# Supplementary material for: Transcriptome analysis of Aspergillus oryzae RIB40 under chemical stress reveals mechanisms of adaptation to fungistatic compounds of lignocellulosic side streams
Source: Biotechnol Biofuels Bioprod. 2025 Aug 8;18:89. doi: 10.1186/s13068-025-02688-5 (PMC12335040; doi:10.1186/s13068-025-02688-5)
Supplement: Supplementary file 2 — Additional file 2: Additional tables to the article. [file 13068_2025_2688_MOESM2_ESM.xlsx]

## Sheet: Table S1
Table S1
Levulinic acid
1 h											24 h
Gene	chr	start	end	length	baseMean	log2FoldChange	lfcSE	pvalue	padj		Gene	chr	start	end	length	baseMean	log2FoldChange	lfcSE	pvalue	padj
AO090010000722	8	1523832	1526088	2256	18064.9	6.67	0.19	3.124e-288	3.616e-284		AO090003000831	2	4331383	4332925	1542	9849.19	7.87	0.18	0	0
AO090005001442	1	2614719	2615968	1249	7544.77	2.23	0.07	3.072e-245	1.778e-241		AO090010000746	8	1450562	1452601	2039	7272.89	-5.61	0.13	0	0
AO090005001280	1	3022637	3023359	722	31918.5	3.01	0.1	3.368e-214	1.3e-210		AO090011000598	7	1517315	1520107	2792	2347.6	5.12	0.13	0	0
AO090003000666	2	3885346	3887151	1805	3885.15	2.33	0.08	1.588e-205	4.594e-202		AO090012000623	4	1591520	1593260	1740	22059.6	10.14	0.26	0	0
AO090701000283	5	1597778	1598704	926	511.23	5.26	0.17	2.227e-203	5.156e-200		AO090012000624	4	1594699	1598460	3761	146972	11.85	0.18	0	0
AO090023000756	3	1978780	1980611	1831	7031.4	1.9	0.06	8.093e-195	1.561e-191		AO090023000599	3	1578633	1579104	471	63317	9.47	0.19	0	0
AO090001000487	2	1230958	1233104	2146	3755.76	2.15	0.07	1.219e-193	2.016e-190		AO090026000494	3	3729524	3731320	1796	34263.1	8.95	0.24	0	0
AO090038000029	6	3583898	3584397	499	1619.56	6.84	0.24	2.902e-184	4.199e-181		AO090120000196	5	3178957	3181001	2044	5448.59	-6.99	0.17	0	0
AO090009000630	1	1680414	1682325	1911	18222.8	2.38	0.08	4.222e-183	5.431e-180		AO090701000752	5	380941	382419	1478	24812.6	10.29	0.25	0	0
AO090701000752	5	380941	382419	1478	12623.6	2.1	0.07	1.778e-178	2.058e-175		AO090009000634	1	1692244	1693446	1202	117360	5.14	0.14	7.269e-282	8.06e-279
AO090012000928	4	2393913	2395406	1493	4100.17	1.9	0.07	1.168e-176	1.229e-173		AO090012000998	4	2585926	2587307	1381	27046.5	5.06	0.15	2.392e-265	2.411e-262
AO090009000016	1	54641	55184	543	505	3.82	0.14	2.872e-174	2.771e-171		AO090701000347	5	1413385	1415021	1636	3749.39	-4.78	0.14	3.668e-259	3.39e-256
AO090038000031	6	3576946	3578745	1799	2288.34	6.49	0.23	3.317e-174	2.954e-171		AO090005001458	1	2566900	2570347	3447	20474.6	-5.21	0.16	3.079e-245	2.626e-242
AO090020000424	6	767689	768583	894	57820.7	6.13	0.22	1.834e-171	1.517e-168		AO090012000626	4	1602265	1603111	846	22383.1	12.08	0.37	1.216e-238	9.635e-236
AO090012000247	4	604544	605108	564	17256.8	5.34	0.2	4.171e-167	3.219e-164		AO090012000809	4	2075512	2076739	1227	21523.6	-3.66	0.11	3.448e-236	2.549e-233
AO090166000087	4	4798825	4800712	1887	2168.24	5.7	0.21	5.146e-167	3.723e-164		AO090009000356	1	948748	951639	2891	79797.6	-5.85	0.18	2.634e-221	1.826e-218
AO090023000467	3	1198894	1200455	1561	43632.9	-2.63	0.1	1.183e-165	8.053e-163		AO090020000573	6	362208	364330	2122	3930.76	-5.82	0.18	3.724e-221	2.429e-218
AO090005000135	1	6079830	6081083	1253	7707.12	1.76	0.06	5.737e-165	3.69e-162		AO090005000125	1	6109651	6110934	1283	12983.5	-5.75	0.19	3.718e-209	2.29e-206
AO090023000033	3	88576	89245	669	2603.4	2.24	0.08	3.319e-164	2.022e-161		AO090003000661	2	3868579	3870542	1963	113641	8.52	0.28	2.573e-204	1.502e-201
AO090005001149	1	3374622	3376029	1407	7521.36	5.93	0.23	4.793e-156	2.774e-153		AO090003000638	2	3816650	3819377	2727	20585.6	-4.95	0.16	4.967e-203	2.754e-200
AO090009000015	1	53558	54571	1013	1530.94	4.19	0.16	2.088e-154	1.151e-151		AO090103000448	8	136273	137557	1284	7967.53	-5.64	0.19	1.27e-202	6.709e-200
AO090701000373	5	1353319	1354741	1422	70428.3	-2.61	0.1	3.394e-153	1.786e-150		AO090020000635	6	205296	206516	1220	2983.25	6.34	0.21	9.707e-202	4.893e-199
AO090102000148	4	4155124	4156375	1251	2088.6	2.29	0.09	2.511e-151	1.264e-148		AO090010000444	8	2197556	2200018	2462	46617.3	4.24	0.14	9.461e-201	4.561e-198
AO090009000129	1	345725	346765	1040	476.82	5.37	0.21	1.811e-150	8.387e-148		AO090020000639	6	199282	200960	1678	2522.55	9.27	0.31	5.572e-195	2.575e-192
AO090023000260	3	669259	670320	1061	793.55	4.98	0.19	1.739e-150	8.387e-148		AO090010000524	8	1989476	1991103	1627	5939.43	-5.28	0.18	2.978e-194	1.321e-191
AO090113000073	5	4226446	4227746	1300	570.93	2.96	0.11	1.091e-148	4.86e-146		AO090009000036	1	103101	103689	588	5286.77	-5.85	0.2	1.805e-183	7.697e-181
AO090012000712	4	1815867	1816886	1019	1838.52	5.32	0.21	9.93e-147	4.258e-144		AO090020000109	6	1530564	1531575	1011	3892.08	5.08	0.18	2.626e-183	1.079e-180
AO090012000132	4	318916	321960	3044	1679.76	3.2	0.13	2.812e-141	1.162e-138		AO090102000473	4	3243572	3244293	721	5083.18	-4.08	0.14	1.826e-182	7.23e-180
AO090102000538	4	3064765	3066544	1779	14722.2	5.35	0.21	1.099e-139	4.387e-137		AO090038000395	6	2622988	2624374	1386	123953	4.33	0.15	3.052e-182	1.167e-179
AO090011000154	7	418656	419745	1089	2351.09	2.37	0.09	1.803e-139	6.957e-137		AO090020000495	6	561891	564533	2642	12093.6	-4.27	0.15	7.93e-179	2.931e-176
AO090003000135	2	2457262	2460057	2795	5225.52	-1.9	0.08	2.688e-138	1.004e-135		AO090038000463	6	2436489	2436964	475	2079.27	9.21	0.33	1.28e-178	4.578e-176
AO090026000833	3	2845886	2848843	2957	2997.66	2.06	0.08	9.965e-138	3.605e-135		AO090023000280	3	724802	726791	1989	1632.61	-5.23	0.18	1.132e-177	3.922e-175
AO090206000077	7	2788988	2790047	1059	3593.25	2.72	0.11	1.325e-137	4.646e-135		AO090003001417	2	5911733	5913030	1297	1416.25	-5.61	0.2	8.53e-177	2.866e-174
AO090026000832	3	2848904	2851961	3057	6408.53	2.94	0.12	2.908e-137	9.9e-135		AO090012000109	4	267771	270241	2470	6770.59	-5.39	0.19	1.688e-175	5.505e-173
AO090023000581	3	1537374	1539054	1680	3544.15	5.27	0.21	3.236e-137	1.07e-134		AO090023000518	3	1350474	1352066	1592	19782.9	-3.14	0.11	2.613e-174	8.278e-172
AO090005000277	1	5696412	5697439	1027	31183.7	-2.32	0.09	9.342e-137	3.004e-134		AO090011000052	7	167015	168338	1323	5959.69	-5.91	0.21	8.916e-172	2.746e-169
AO090005000414	1	5365160	5365661	501	3980.94	5.06	0.21	1.166e-136	3.647e-134		AO090005001411	1	2689450	2690712	1262	12670.2	-5.64	0.2	1.721e-169	5.157e-167
AO090701000129	5	1998363	1999655	1292	4461.25	2.19	0.09	5.55e-136	1.691e-133		AO090026000559	3	3553096	3554390	1294	2789.44	-6.66	0.24	3.552e-166	1.037e-163
AO090012000848	4	2183567	2188153	4586	1683.91	2.12	0.09	1.217e-135	3.614e-133		AO090023000140	3	356160	357504	1344	14426.9	4.26	0.16	1.124e-165	3.195e-163
AO090012000371	4	917722	918142	420	461.56	3.99	0.16	1.521e-135	4.403e-133		AO090005000962	1	3847623	3849625	2002	75421.8	-7.12	0.26	6.985e-163	1.936e-160
AO090011000598	7	1517315	1520107	2792	16749.8	2.3	0.09	2.492e-135	7.037e-133		AO090005001107	1	3485096	3486255	1159	3456.23	7.03	0.26	6.711e-159	1.815e-156
AO090020000048	6	1686334	1687039	705	2992.56	2.36	0.1	5.311e-134	1.464e-131		AO090003000475	2	3367993	3371814	3821	1320.23	-4.33	0.16	8.7e-158	2.297e-155
AO090120000068	5	2840738	2843209	2471	60272.8	4.22	0.17	1.623e-132	4.37e-130		AO090120000370	5	3660114	3661319	1205	3597.47	-4.48	0.17	5.896e-157	1.52e-154
AO090701000709	5	499552	501552	2000	4842.07	1.98	0.08	8.44e-132	2.221e-129		AO090038000061	6	3513149	3514823	1674	3724.49	-7.17	0.27	8.189e-155	2.064e-152
AO090011000885	7	2264418	2265035	617	2895.57	3.88	0.16	1.018e-131	2.62e-129		AO090102000076	4	4345845	4347202	1357	1815.35	-5.13	0.19	2.583e-154	6.366e-152
AO090005001182	1	3294195	3296365	2170	3420.49	1.61	0.07	2.983e-131	7.508e-129		AO090701000359	5	1385153	1386797	1644	47682.9	3.84	0.15	7.376e-154	1.778e-151
AO090009000219	1	593813	595676	1863	7278.04	2.64	0.11	9.01e-131	2.219e-128		AO090005000447	1	5260732	5261816	1084	14498.9	-6.22	0.24	2.247e-153	5.303e-151
AO090026000705	3	3196123	3197192	1069	3734.18	1.82	0.08	7.402e-130	1.785e-127		AO090010000289	8	2607694	2608228	534	2799.09	-5.3	0.2	1.197e-152	2.764e-150
AO090005000886	1	4056449	4058903	2454	10554.6	2.67	0.11	2.291e-129	5.413e-127		AO090009000405	1	1073624	1074930	1306	171493	2.98	0.11	2.539e-152	5.746e-150
AO090026000248	3	4420645	4421851	1206	813.38	2.76	0.11	3.138e-129	7.265e-127		AO090003000547	2	3550023	3551537	1514	542.61	4.98	0.19	1.814e-151	4.024e-149
AO090009000465	1	1224145	1225075	930	1324.83	4.97	0.21	5.787e-128	1.314e-125		AO090120000195	5	3175547	3177031	1484	2276.09	-3.55	0.14	5.297e-150	1.152e-147
AO090701000682	5	576196	578259	2063	8107.9	4.14	0.17	5.91e-128	1.316e-125		AO090011000202	7	524616	525867	1251	118470	7.45	0.29	1.46e-146	3.113e-144
AO090701000318	5	1504420	1506509	2089	4293.76	2.02	0.08	3.79e-126	8.278e-124		AO090138000201	6	3705626	3707696	2070	1180.51	-3.66	0.14	8.321e-146	1.741e-143
AO090009000468	1	1234018	1235040	1022	789.54	3.68	0.16	4.127e-126	8.848e-124		AO090005000121	1	6116727	6119560	2833	2395.74	-3.72	0.15	1.456e-145	2.989e-143
AO090026000179	3	4616230	4616785	555	3850.59	2.83	0.12	2.96e-123	6.229e-121		AO090023000944	3	2488463	2490507	2044	5818.83	-6.55	0.26	4.719e-143	9.514e-141
AO090009000659	1	1762154	1763254	1100	9163.72	1.64	0.07	3.57e-123	7.38e-121		AO090701000738	5	414945	415644	699	1943.62	7.36	0.29	1.268e-141	2.51e-139
AO090009000434	1	1137508	1138493	985	1085.78	2.17	0.09	3.779e-123	7.675e-121		AO090003000077	2	2297826	2299770	1944	20810.8	-7.08	0.28	4.06e-141	7.875e-139
AO090020000314	6	1046383	1047582	1199	15006.7	1.42	0.06	3.873e-123	7.73e-121		AO090005001300	1	2935544	2937309	1765	50569.2	3.99	0.16	4.119e-141	7.875e-139
AO090020000390	6	846724	848625	1901	16700.1	4.48	0.19	1.672e-122	3.28e-120		AO090003001247	2	5485703	5487288	1585	8896.07	-5.75	0.23	7.554e-140	1.42e-137
AO090701000725	5	439915	440965	1050	22337.9	2.33	0.1	1.711e-122	3.301e-120		AO090001000449	2	1138210	1140589	2379	6744.22	-3.91	0.16	1.071e-139	1.98e-137
AO090701000429	5	1208958	1210191	1233	1246.82	3.65	0.16	8.014e-121	1.521e-118		AO090023000799	3	2073297	2073768	471	21132.7	-6.34	0.25	1.793e-138	3.259e-136
AO090023000335	3	858081	858990	909	5275.88	4.74	0.21	1.632e-120	3.048e-118		AO090103000447	8	138211	139807	1596	4298.85	-5.95	0.24	6.875e-137	1.23e-134
AO090009000094	1	271779	272312	533	599.99	4.63	0.2	2.974e-119	5.465e-117		AO090023000318	3	809834	810977	1143	2052.85	8.82	0.36	9.125e-135	1.606e-132
AO090701000047	5	2223761	2226846	3085	2586.83	1.49	0.06	8.702e-119	1.574e-116		AO090003000666	2	3885346	3887151	1805	1109.14	3.2	0.13	6.159e-133	1.067e-130
AO090701000131	5	1993766	1995110	1344	1299.65	1.97	0.09	1.047e-117	1.865e-115		AO090102000152	4	4145489	4147231	1742	3067.3	-3.72	0.15	7.482e-133	1.276e-130
AO090003000751	2	4111870	4113211	1341	1825.56	-2.34	0.1	2.671e-117	4.685e-115		AO090102000514	4	3127614	3128788	1174	1250.4	-4.54	0.19	1.395e-132	2.344e-130
AO090102000026	4	4482255	4483749	1494	1664.41	-1.8	0.08	1.371e-116	2.368e-114		AO090010000592	8	1833927	1835288	1361	662.22	-3.91	0.16	5.018e-132	8.305e-130
AO090003001482	2	6050663	6053467	2804	1962.07	-2.37	0.1	4.22e-115	7.184e-113		AO090026000775	3	3017602	3019486	1884	73300.3	-5.25	0.22	5.363e-132	8.746e-130
AO090009000153	1	413318	414260	942	1015.01	5.6	0.25	1.311e-114	2.199e-112		AO090120000371	5	3661942	3663103	1161	2926.41	-3.39	0.14	1.638e-131	2.633e-129
AO090003001112	2	5121793	5124068	2275	28381.8	-1.67	0.07	1.343e-114	2.22e-112		AO090005000326	1	5590501	5591968	1467	2404.64	-6.8	0.28	3.327e-131	5.27e-129
AO090011000342	7	874862	878504	3642	1661.77	2.41	0.11	2.136e-113	3.482e-111		AO090005001567	1	2232243	2234034	1791	4074.52	3.7	0.15	8.495e-131	1.327e-128
AO090003001032	2	4876447	4877736	1289	5669.52	-2.06	0.09	2.453e-112	3.944e-110		AO090038000471	6	2400020	2405022	5002	33010	-7.06	0.29	1.498e-130	2.308e-128
AO090113000138	5	4372771	4374466	1695	322.04	5.24	0.24	3.899e-110	6.183e-108		AO090012000169	4	402636	403530	894	821.5	7.1	0.29	2.557e-130	3.885e-128
AO090023000688	3	1811685	1812789	1104	4091.8	6.6	0.3	1.238e-109	1.936e-107		AO090001000590	2	1547450	1548328	878	5045.05	-3.95	0.16	1.082e-129	1.622e-127
AO090003000398	2	3149445	3150301	856	26354.9	3.75	0.17	3.472e-109	5.359e-107		AO090005001192	1	3274106	3275198	1092	21940.7	3.4	0.14	2.041e-129	3.018e-127
AO090005000688	1	4613020	4616376	3356	8987.35	-1.62	0.07	1.306e-108	1.99e-106		AO090010000102	8	3154203	3155214	1011	1335.47	-5.97	0.25	9.411e-129	1.373e-126
AO090009000388	1	1038443	1039352	909	825.45	-2.33	0.11	5.882e-108	8.842e-106		AO090026000606	3	3433746	3435916	2170	1917.65	3.16	0.13	1.337e-127	1.925e-125
AO090023000995	3	2630785	2633339	2554	1711.85	-1.8	0.08	1.48e-107	2.196e-105		AO090005001117	1	3450657	3451906	1249	22844.8	3.64	0.15	2.306e-127	3.279e-125
AO090120000504	5	4029357	4030599	1242	931.77	5.78	0.27	4.76e-106	6.975e-104		AO090012000327	4	799848	800525	677	1452.56	-5.93	0.25	2.478e-127	3.479e-125
AO090011000370	7	949388	950269	881	1954.91	-2.57	0.12	1.167e-102	1.689e-100		AO090701000314	5	1517639	1519815	2176	6616.55	-6.83	0.29	8.184e-127	1.134e-124
AO090012000825	4	2125299	2128886	3587	809.63	-2.3	0.11	2.886e-101	4.124e-99		AO090102000471	4	3245224	3245857	633	5094.01	-4.1	0.17	7.849e-126	1.074e-123
AO090005000357	1	5523794	5524556	762	636.47	3.41	0.16	3.044e-100	4.297e-98		AO090001000152	2	341068	342305	1237	1719.05	7.76	0.33	1.155e-125	1.563e-123
AO090023000412	3	1055420	1056278	858	1860.43	3.48	0.17	5.432e-100	7.576e-98		AO090023000488	3	1262485	1264377	1892	1052.04	-3.46	0.15	1.416e-125	1.892e-123
AO090120000396	5	3740549	3742624	2075	49204.7	4.76	0.23	5.691e-100	7.843e-98		AO090701000685	5	568158	569661	1503	11209.2	4.98	0.21	1.885e-125	2.489e-123
AO090009000244	1	651220	656113	4893	10075.1	-1.6	0.08	2.786e-99	3.794e-97		AO090120000112	5	2959173	2959864	691	28028.9	4.97	0.21	1.036e-123	1.351e-121
AO090003000029	2	2174181	2174764	583	2096.24	1.74	0.08	1.875e-98	2.523e-96		AO090005000988	1	3784079	3785499	1420	9913.64	-6.46	0.27	1.121e-123	1.446e-121
AO090701000311	5	1528704	1530734	2030	4023.03	-2.63	0.13	2.381e-98	3.168e-96		AO090005001384	1	2751513	2753127	1614	3955.83	-3.86	0.16	4.231e-123	5.392e-121
AO090102000515	4	3122862	3127140	4278	6557.04	1.29	0.06	3.617e-98	4.758e-96		AO090023000033	3	88576	89245	669	916.18	7.35	0.31	5.295e-123	6.672e-121
AO090038000241	6	3026581	3028129	1548	2139.01	-1.68	0.08	5.076e-98	6.602e-96		AO090011000630	7	1618455	1622275	3820	6286.77	2.9	0.12	9.532e-123	1.188e-120
AO090023000123	3	311996	313254	1258	14970.8	4.13	0.2	2.883e-97	3.708e-95		AO090003000941	2	4644460	4647369	2909	1592.38	-5.05	0.22	3.347e-122	4.123e-120
AO090113000109	5	4310461	4311524	1063	4881.68	3.1	0.15	1.742e-96	2.216e-94		AO090010000020	8	3350173	3350812	639	989.53	-4.37	0.19	6.779e-121	8.261e-119
AO090010000401	8	2303412	2304284	872	333.09	5.49	0.27	3.538e-96	4.452e-94		AO090206000001	7	2587704	2589522	1818	15992.9	4.01	0.17	2.102e-120	2.533e-118
AO090020000479	6	600534	602414	1880	281.29	4.31	0.21	4.121e-96	5.13e-94		AO090026000219	3	4500526	4502171	1645	839.66	-3.61	0.16	2.245e-120	2.676e-118
AO090012000289	4	713504	717124	3620	3808.16	1.8	0.09	9.994e-96	1.231e-93		AO090001000406	2	1014837	1016349	1512	3855.03	4.18	0.18	1.991e-119	2.348e-117
AO090102000559	4	3003698	3006714	3016	6283.4	-1.47	0.07	4.715e-95	5.745e-93		AO090003000050	2	2219966	2222319	2353	2622.05	-5.36	0.23	4.776e-119	5.575e-117
AO090023000854	3	2231041	2232064	1023	18418.8	1.57	0.08	1.409e-94	1.699e-92		AO090020000095	6	1563287	1563848	561	5145.3	-6.97	0.3	5.887e-118	6.8e-116
AO090023000469	3	1204630	1205452	822	3663.19	1.37	0.07	2.368e-94	2.826e-92		AO090011000415	7	1057793	1059707	1914	5903.62	9.97	0.44	1.551e-117	1.773e-115
AO090011000808	7	2057401	2058013	612	175.43	4.56	0.22	8.198e-94	9.684e-92		AO090001000649	2	1713656	1716256	2600	1584.6	-3.19	0.14	1.427e-116	1.614e-114
AO090001000525	2	1367071	1369474	2403	2489.69	1.54	0.08	3.732e-93	4.363e-91		AO090124000068	5	2512468	2514635	2167	726.24	-5.28	0.23	1.758e-116	1.969e-114
AO090120000022	5	2738080	2738971	891	1090.78	4.61	0.23	2.366e-92	2.739e-90		AO090005000323	1	5596544	5598427	1883	798.64	-6.64	0.29	1.874e-116	2.078e-114
AO090020000180	6	1375475	1376703	1228	2492.69	1.62	0.08	4.404e-92	5.048e-90		AO090012000465	4	1160372	1162294	1922	12323.1	-6.57	0.29	8.97e-116	9.848e-114
AO090005000739	1	4451701	4452360	659	26110.3	3.62	0.18	5.012e-92	5.688e-90		AO090120000008	5	2712149	2713808	1659	3396.45	-6.01	0.26	3.089e-115	3.358e-113
AO090003000439	2	3261088	3262015	927	6520.94	3.2	0.16	1.116e-91	1.254e-89		AO090003000984	2	4768669	4769657	988	20229.7	7.24	0.32	4.068e-115	4.379e-113
AO090003000502	2	3438197	3440362	2165	4497.58	1.21	0.06	1.854e-91	2.063e-89		AO090005001084	1	3549772	3552746	2974	7631.61	-4.54	0.2	4.823e-115	5.142e-113
AO090701000598	5	779413	780730	1317	7954.96	-2.55	0.13	4.564e-91	5.032e-89		AO090102000339	4	3604260	3605719	1459	6470.75	8.1	0.36	6.538e-115	6.905e-113
AO090005001147	1	3380017	3381052	1035	12507.5	3.34	0.17	1.593e-90	1.739e-88		AO090020000547	6	423878	424291	413	626.99	-5.28	0.23	7.359e-115	7.698e-113
AO090009000457	1	1198191	1200021	1830	9739.52	-1.85	0.09	2.589e-90	2.785e-88		AO090023000896	3	2345727	2347975	2248	6104.92	5.16	0.23	8.809e-115	9.129e-113
AO090010000533	8	1968500	1969486	986	12940.5	4.88	0.25	2.599e-90	2.785e-88		AO090102000627	4	2835275	2837167	1892	31619.3	3.13	0.14	4.591e-113	4.714e-111
AO090020000703	6	42441	44775	2334	9260.67	-1.84	0.09	4.372e-90	4.643e-88		AO090038000223	6	3075942	3078446	2504	902.12	-5.72	0.26	2.019e-112	2.054e-110
AO090038000173	6	3232509	3233589	1080	4542.95	4.19	0.21	6.934e-90	7.297e-88		AO090011000869	7	2220902	2222027	1125	2448.51	-3.93	0.18	1.453e-111	1.465e-109
AO090701000424	5	1222119	1223072	953	333.39	6.62	0.34	1.193e-89	1.244e-87		AO090003001171	2	5278396	5280020	1624	31090	3.81	0.17	2.981e-111	2.978e-109
AO090001000219	2	518069	518536	467	2565.81	-1.5	0.08	1.839e-89	1.9e-87		AO090003001507	2	6130841	6131798	957	23944.2	-6.27	0.28	9.916e-111	9.818e-109
AO090012000098	4	237693	239568	1875	1386.41	4.68	0.24	2.745e-89	2.812e-87		AO090010000019	8	3351264	3352060	796	1303.65	-3.4	0.15	1.325e-110	1.3e-108
AO090003000483	2	3389474	3391148	1674	2923.5	1.44	0.07	6.715e-89	6.819e-87		AO090005001239	1	3137858	3138299	441	6627.3	7.45	0.34	2.766e-110	2.691e-108
AO090701000824	5	210632	211664	1032	2858.37	-1.7	0.09	1.061e-88	1.068e-86		AO090001000431	2	1083566	1084736	1170	3289.13	-4.68	0.21	5.842e-110	5.633e-108
AO090138000093	6	4000223	4001032	809	1514.49	2.92	0.15	1.576e-88	1.573e-86		AO090023000024	3	65611	65999	388	43805.7	-7.06	0.32	8.79e-110	8.403e-108
AO090011000781	7	1983920	1984976	1056	3052.69	-2.26	0.11	1.857e-88	1.837e-86		AO090038000235	6	3043828	3045226	1398	1757.26	-3.26	0.15	1.814e-109	1.719e-107
AO090138000084	6	4023713	4024182	469	459.54	4.07	0.21	3.052e-88	2.994e-86		AO090023000910	3	2385848	2387890	2042	1701.4	3.11	0.14	6.303e-109	5.923e-107
AO090003001092	2	5063650	5065118	1468	1437.58	2.21	0.11	9.695e-88	9.431e-86		AO090011000513	7	1284916	1286908	1992	4091.52	3.49	0.16	1.237e-108	1.152e-106
AO090023000494	3	1281850	1284688	2838	4902.71	-1.39	0.07	2.284e-87	2.203e-85		AO090012000944	4	2437678	2441206	3528	19460	-5.03	0.23	1.292e-108	1.194e-106
AO090010000445	8	2195493	2196517	1024	13451.1	4.75	0.24	3.153e-87	3.017e-85		AO090001000162	2	369132	370660	1528	11060.8	-3.98	0.18	1.335e-108	1.224e-106
AO090023000832	3	2170598	2172005	1407	1084.21	2.87	0.15	1.021e-86	9.685e-85		AO090102000173	4	4087278	4088668	1390	6607.42	4.08	0.19	5.918e-107	5.379e-105
AO090020000687	6	82961	83637	676	5209.9	3.5	0.18	4.669e-86	4.394e-84		AO090023000467	3	1198894	1200455	1561	74873.9	-4.09	0.19	4.078e-106	3.677e-104
AO090001000750	2	1995552	1996741	1189	4529.48	1.5	0.08	7.911e-86	7.385e-84		AO090023000412	3	1055420	1056278	858	601.14	5.21	0.24	6.674e-106	5.969e-104
AO090003001096	2	5074315	5075566	1251	14992.5	3.15	0.16	9.742e-86	9.022e-84		AO090010000621	8	1764726	1765875	1149	2240.1	-5.91	0.27	1.607e-105	1.426e-103
AO090701000402	5	1279376	1281536	2160	248.79	3.74	0.19	1.454e-85	1.336e-83		AO090011000456	7	1152604	1153381	777	1063.86	2.77	0.13	3.579e-105	3.15e-103
AO090020000492	6	568385	570234	1849	4926.31	-2.47	0.13	5.235e-85	4.772e-83		AO090012000326	4	798668	799154	486	896.96	-6.37	0.3	1.396e-104	1.218e-102
AO090102000058	4	4397323	4400204	2881	536.29	2.25	0.12	1.47e-84	1.329e-82		AO090005001234	1	3148476	3150225	1749	1441.78	2.94	0.14	1.644e-104	1.425e-102
AO090003000124	2	2430575	2431616	1041	9242.05	5.07	0.27	5.017e-84	4.502e-82		AO090005001315	1	2903478	2905672	2194	3820.57	3.07	0.14	1.95e-104	1.676e-102
AO090020000493	6	566387	568008	1621	3861.57	-2.42	0.13	5.48e-84	4.88e-82		AO090012000328	4	802188	806884	4696	15766	-4.92	0.23	4.407e-104	3.759e-102
AO090026000394	3	4002799	4004349	1550	10801	1.97	0.1	1.709e-83	1.511e-81		AO090003001250	2	5491379	5492446	1067	3156.7	3.61	0.17	1.228e-103	1.04e-101
AO090012000399	4	981047	982423	1376	5945.05	2	0.1	3.124e-83	2.739e-81		AO090020000138	6	1467531	1468209	678	588.57	-3.49	0.16	1.052e-102	8.835e-101
AO090102000022	4	4486656	4488658	2002	3869.59	-1.82	0.09	3.54e-83	3.081e-81		AO090701000489	5	1068866	1071845	2979	1374.61	-4.9	0.23	2.038e-102	1.699e-100
AO090003000839	2	4357394	4359605	2211	5188.44	3.11	0.16	4.428e-83	3.825e-81		AO090005000768	1	4368054	4368978	924	921.87	-6.23	0.29	3.206e-102	2.653e-100
AO090012000660	4	1678729	1680412	1683	9502.03	2.14	0.11	4.88e-83	4.185e-81		AO090023000749	3	1959680	1961031	1351	881.43	-4.86	0.23	9.985e-102	8.201e-100
AO090009000168	1	444705	446290	1585	825.37	2.38	0.12	6.951e-83	5.917e-81		AO090010000021	8	3348400	3349933	1533	883.28	-4.52	0.21	1.007e-101	8.21e-100
AO090113000008	5	4067710	4069175	1465	622.88	-3.36	0.18	7.867e-83	6.647e-81		AO090012000166	4	394767	395256	489	1822.87	-6.38	0.3	1.406e-101	1.138e-99
AO090124000043	5	2578738	2579383	645	1287.72	-2.21	0.12	7.997e-83	6.708e-81		AO090012000399	4	981047	982423	1376	1027.14	3.78	0.18	3.777e-101	3.035e-99
AO090010000726	8	1515509	1516844	1335	620.92	3.3	0.17	1.165e-82	9.699e-81		AO090009000362	1	968507	970104	1597	1049.33	3.38	0.16	1.941e-100	1.548e-98
AO090103000133	8	914563	915392	829	1542.07	3.21	0.17	1.318e-82	1.09e-80		AO090003000854	2	4412355	4414723	2368	4018.83	6.17	0.29	2.162e-99	1.712e-97
AO090102000525	4	3095389	3097080	1691	4430.42	2.42	0.13	1.691e-82	1.388e-80		AO090020000332	6	995524	996761	1237	10125.6	-2.83	0.13	2.868e-99	2.256e-97
AO090005001544	1	2307352	2307867	515	1938.32	1.92	0.1	4.253e-82	3.467e-80		AO090026000048	3	4995933	4996896	963	791.88	-6.58	0.31	6.343e-99	4.919e-97
AO090001000213	2	494620	496163	1543	3261.85	-1.39	0.07	4.964e-82	4.018e-80		AO090103000421	8	197963	200845	2882	1953.09	10.93	0.53	6.339e-99	4.919e-97
AO090009000289	1	767044	768241	1197	63121.8	3.54	0.19	5.417e-82	4.355e-80		AO090005000769	1	4365239	4366939	1700	1699.14	-7.16	0.34	9.093e-99	7.003e-97
AO090701000175	5	1872620	1874524	1904	16138.8	-1.55	0.08	1.747e-81	1.395e-79		AO090023000756	3	1978780	1980611	1831	3814.29	3.8	0.18	1.344e-98	1.028e-96
AO090701000841	5	156940	159375	2435	198.18	3.93	0.21	1.856e-81	1.472e-79		AO090003000180	2	2579955	2581524	1569	4473.39	4.68	0.22	2.17e-98	1.648e-96
AO090103000083	8	1045938	1046525	587	552.22	-2.32	0.12	2.029e-81	1.598e-79		AO090023000951	3	2518120	2519556	1436	3212.33	-4.36	0.21	2.773e-98	2.092e-96
AO090005000353	1	5534963	5536792	1829	451.65	-2.46	0.13	2.128e-81	1.665e-79		AO090009000015	1	53558	54571	1013	1140.09	9.92	0.48	4.079e-98	3.056e-96
AO090701000057	5	2193835	2196313	2478	3671.04	1.59	0.08	2.266e-81	1.761e-79		AO090026000794	3	2974288	2976287	1999	6392.52	4.58	0.22	1.131e-97	8.417e-96
AO090005000703	1	4568832	4571376	2544	416.79	-2.37	0.12	3.389e-81	2.616e-79		AO090138000132	6	3893214	3893739	525	8852	-3.2	0.15	1.457e-97	1.077e-95
AO090020000688	6	81898	82725	827	7163.27	3.8	0.2	3.785e-81	2.902e-79		AO090038000281	6	2925321	2927010	1689	13674.5	7.31	0.35	6.14e-97	4.509e-95
AO090005000165	1	5992190	5995613	3423	2203.35	1.91	0.1	1.024e-80	7.797e-79		AO090672000001	3	2666763	2667659	896	9960.85	-4.01	0.19	6.678e-97	4.872e-95
AO090103000134	8	913286	914138	852	1914.54	-2.34	0.12	1.093e-80	8.272e-79		AO090011000203	7	527348	528182	834	1432.69	5.08	0.24	7.373e-97	5.344e-95
AO090005001652	1	2003854	2005030	1176	8038.13	2.18	0.12	1.663e-80	1.25e-78		AO090005000228	1	5830465	5832366	1901	6525.82	-6.44	0.31	1.793e-96	1.291e-94
AO090010000350	8	2421028	2425025	3997	3853.08	3.41	0.18	3.319e-80	2.479e-78		AO090010000176	8	2947434	2948525	1091	1369.52	-6.01	0.29	2.761e-96	1.975e-94
AO090020000495	6	561891	564533	2642	1750.23	-2.52	0.13	3.702e-80	2.747e-78		AO090020000339	6	982810	984539	1729	1541.88	3.85	0.19	2.917e-96	2.073e-94
AO090102000497	4	3178374	3180484	2110	5793.08	1.83	0.1	5.149e-80	3.796e-78		AO090166000076	4	4773025	4774908	1883	4731.59	5.84	0.28	3.016e-96	2.13e-94
AO090001000239	2	584615	585335	720	557.5	3.9	0.21	6.301e-80	4.616e-78		AO090020000618	6	246783	248297	1514	3146.11	3.62	0.18	4.11e-96	2.885e-94
AO090003000661	2	3868579	3870542	1963	389163	3.31	0.18	9.566e-80	6.964e-78		AO090005000248	1	5777060	5778735	1675	926.65	-5.59	0.27	6.358e-96	4.434e-94
AO090003000972	2	4727817	4730261	2444	15362.1	-1.28	0.07	2.604e-79	1.884e-77		AO090038000122	6	3354541	3356203	1662	718.73	-6.51	0.32	1.866e-95	1.293e-93
AO090001000293	2	726482	734003	7521	979.42	-1.87	0.1	5.164e-79	3.713e-77		AO090011000352	7	903352	905295	1943	9904.14	-6.29	0.31	2.56e-95	1.763e-93
AO090011000884	7	2263768	2264323	555	3742.86	3.8	0.2	8.008e-79	5.723e-77		AO090010000471	8	2133405	2134906	1501	5797.37	2.47	0.12	3.618e-95	2.477e-93
AO090012000227	4	565052	565997	945	776.59	-2	0.11	1.354e-78	9.616e-77		AO090023000099	3	247704	249339	1635	6236.94	2.55	0.12	3.731e-95	2.538e-93
AO090102000290	4	3740533	3741723	1190	3657.54	2.51	0.13	1.385e-78	9.778e-77		AO090023000696	3	1836335	1837499	1164	10349.7	-2.36	0.11	1.889e-94	1.277e-92
AO090003000741	2	4079169	4081460	2291	3078.02	-2.07	0.11	3.493e-78	2.451e-76		AO090012000948	4	2466555	2467966	1411	18190.8	2.77	0.14	8.761e-94	5.888e-92
AO090012000129	4	312120	313055	935	5579.36	3.2	0.17	9.393e-78	6.55e-76		AO090701000246	5	1693893	1694926	1033	1590.84	-5.45	0.27	3.5e-93	2.338e-91
AO090020000603	6	295044	296856	1812	5181.38	3.46	0.19	1.469e-77	1.018e-75		AO090012000265	4	644701	647618	2917	2107.01	-2.05	0.1	3.709e-93	2.463e-91
AO090038000025	6	3598100	3600400	2300	654.09	-2.43	0.13	3.008e-76	2.072e-74		AO090103000449	8	134498	135162	664	3275.16	-5.64	0.28	1.289e-92	8.508e-91
AO090011000374	7	954494	955450	956	2728.44	-3.07	0.17	7.834e-76	5.366e-74		AO090023000923	3	2423402	2424848	1446	85449.2	8.41	0.42	2.067e-92	1.356e-90
AO090001000193	2	439438	444011	4573	2598.38	-1.99	0.11	8.687e-76	5.915e-74		AO090023000095	3	240360	241809	1449	1884.53	-3.6	0.18	3.106e-92	2.026e-90
AO090026000284	3	4312188	4314513	2325	10627.1	1.88	0.1	1.138e-75	7.703e-74		AO090701000100	5	2091887	2094141	2254	2859.84	3.44	0.17	3.295e-92	2.137e-90
AO090701000041	5	2246278	2248606	2328	10015.8	1.87	0.1	3.952e-75	2.66e-73		AO090012000324	4	797669	798111	442	607.28	-5.94	0.29	1.092e-91	7.041e-90
AO090023000501	3	1307530	1308153	623	897.47	1.75	0.1	4.062e-75	2.718e-73		AO090005000740	1	4445942	4448651	2709	5179.65	-6.62	0.33	5.919e-91	3.794e-89
AO090005000631	1	4767004	4767808	804	6809.34	4.47	0.25	5.022e-75	3.341e-73		AO090038000460	6	2441173	2444006	2833	732.98	-5.2	0.26	7.368e-91	4.695e-89
AO090003000477	2	3377601	3380260	2659	10012.8	1.75	0.1	5.617e-75	3.716e-73		AO090003001482	2	6050663	6053467	2804	1672.33	7.78	0.39	7.898e-91	5.005e-89
AO090012000562	4	1435747	1436240	493	997.17	-2.66	0.15	1.162e-74	7.64e-73		AO090003000548	2	3552362	3553172	810	980.9	4.53	0.23	1.205e-90	7.59e-89
AO090003000644	2	3825098	3826367	1269	5545.12	3.18	0.18	2.539e-74	1.66e-72		AO090103000134	8	913286	914138	852	6496.57	-3.17	0.16	1.259e-90	7.886e-89
AO090020000351	6	955157	956970	1813	8898.53	-2.53	0.14	2.561e-74	1.665e-72		AO090011000917	7	2392786	2395052	2266	2838.08	-3.82	0.19	2.544e-90	1.585e-88
AO090020000615	6	253883	254804	921	416.87	4.25	0.24	3.421e-74	2.213e-72		AO090005000455	1	5241303	5243177	1874	8708.51	5.76	0.29	6.343e-90	3.929e-88
AO090005001339	1	2846333	2846826	493	1099.49	3.68	0.2	8.617e-74	5.542e-72		AO090020000686	6	84812	86202	1390	369.4	4.2	0.21	8.168e-90	5.032e-88
AO090005001529	1	2350599	2351646	1047	4334.02	3.27	0.18	9.808e-74	6.273e-72		AO090011000744	7	1901070	1902838	1768	52695.9	-6.52	0.33	1.371e-89	8.398e-88
AO090102000255	4	3860625	3862328	1703	4208.27	2.78	0.15	1.405e-73	8.934e-72		AO090003001418	2	5913150	5913626	476	453.56	-5.51	0.28	1.53e-89	9.324e-88
AO090003000851	2	4402621	4403654	1033	475.39	-2.83	0.16	1.497e-73	9.466e-72		AO090103000132	8	915979	917547	1568	1535.29	-2.43	0.12	2.018e-89	1.223e-87
AO090012000809	4	2075512	2076739	1227	4789.36	-3.01	0.17	1.764e-73	1.11e-71		AO090010000391	8	2315613	2317527	1914	1275.14	-3.64	0.18	2.256e-89	1.36e-87
AO090012000949	4	2468301	2469918	1617	1833.23	2.74	0.15	6.081e-73	3.805e-71		AO090701000363	5	1377011	1377797	786	1221.24	-5.59	0.28	2.507e-89	1.503e-87
AO090701000235	5	1720426	1722032	1606	7977.73	2.44	0.14	6.429e-73	4.001e-71		AO090020000170	6	1390910	1392663	1753	3488.99	-3.07	0.15	9.628e-89	5.74e-87
AO090005001315	1	2903478	2905672	2194	12134	2.67	0.15	7.763e-73	4.806e-71		AO090026000639	3	3355620	3356740	1120	7319.33	-4.17	0.21	1.367e-88	8.108e-87
AO090010000211	8	2838795	2840190	1395	3785.57	1.96	0.11	9.509e-73	5.855e-71		AO090011000540	7	1355293	1358565	3272	20351	-3.14	0.16	4.992e-88	2.944e-86
AO090009000135	1	366365	368033	1668	339.64	8.41	0.5	9.652e-73	5.912e-71		AO090009000294	1	783272	784877	1605	3194.33	2.83	0.14	7.015e-88	4.116e-86
AO090005001084	1	3549772	3552746	2974	550.2	-2.66	0.15	1.31e-72	7.984e-71		AO090023000348	3	886008	887791	1783	794.55	-3.48	0.18	2.323e-87	1.356e-85
AO090026000714	3	3168019	3169352	1333	2867.37	-1.88	0.11	1.948e-72	1.181e-70		AO090012000193	4	477324	478413	1089	7250.16	-4.68	0.24	2.381e-87	1.383e-85
AO090102000413	4	3399726	3401147	1421	1745.85	-2.03	0.11	6.673e-72	4.024e-70		AO090012000001	4	272	2039	1767	1722.13	-6.67	0.34	3.152e-87	1.82e-85
AO090005001568	1	2230377	2231741	1364	4003.84	1.59	0.09	7.309e-72	4.384e-70		AO090003001411	2	5895583	5897322	1739	818.93	-5.99	0.3	3.251e-87	1.868e-85
AO090010000505	8	2038794	2039826	1032	9635.04	1.47	0.08	9.781e-72	5.837e-70		AO090102000360	4	3550577	3551808	1231	131469	3.81	0.19	3.404e-87	1.946e-85
AO090005000449	1	5253044	5254970	1926	207.62	5.24	0.3	1.058e-71	6.279e-70		AO090001000625	2	1634828	1637037	2209	649.77	-5.93	0.3	7.732e-87	4.397e-85
AO090011000910	7	2375879	2377979	2100	609.89	-2.73	0.15	2.64e-71	1.559e-69		AO090005000246	1	5780085	5781956	1871	3032.5	-4.68	0.24	1.29e-86	7.3e-85
AO090005000497	1	5120446	5121520	1074	1917.08	3.24	0.18	2.898e-71	1.703e-69		AO090001000383	2	965090	966435	1345	1501.79	3.76	0.19	3.084e-86	1.736e-84
AO090012000671	4	1707949	1709107	1158	1751.45	-2.72	0.15	3.8e-71	2.221e-69		AO090003000477	2	3377601	3380260	2659	3284.81	2.71	0.14	1.096e-85	6.137e-84
AO090023001002	3	2644965	2645593	628	4961.03	1.78	0.1	6.546e-71	3.808e-69		AO090026000394	3	4002799	4004349	1550	2077.88	4.08	0.21	1.259e-85	7.017e-84
AO090113000132	5	4362181	4362684	503	3285.64	-2.64	0.15	7.396e-71	4.281e-69		AO090010000082	8	3198343	3199859	1516	1150.66	-3.05	0.16	1.366e-85	7.576e-84
AO090003001165	2	5267320	5268920	1600	33743.4	2.22	0.13	1.21e-70	6.969e-69		AO090023000919	3	2409082	2411066	1984	9004.52	-5.96	0.31	1.447e-85	7.984e-84
AO090023000443	3	1125762	1127004	1242	3444.82	3.25	0.18	1.448e-70	8.3e-69		AO090103000206	8	753177	754181	1004	725.26	7.5	0.39	1.52e-85	8.342e-84
AO090005000099	1	6176450	6177869	1419	2059.26	2.48	0.14	2.164e-70	1.234e-68		AO090003001504	2	6119409	6120144	735	567.69	-3.6	0.19	1.585e-85	8.66e-84
AO090120000045	5	2788382	2790118	1736	1720.68	-2.44	0.14	2.287e-70	1.298e-68		AO090026000050	3	4989985	4992080	2095	643.21	-6.1	0.31	1.895e-85	1.03e-83
AO090023000646	3	1695636	1697414	1778	1201.95	2.54	0.14	2.707e-70	1.529e-68		AO090701000838	5	167107	168038	931	1353.92	-4.8	0.25	3.12e-85	1.687e-83
AO090138000059	6	4072491	4073171	680	1008.62	3.9	0.22	3.148e-70	1.769e-68		AO090103000105	8	997487	998744	1257	3474.2	-6.19	0.32	8.093e-85	4.356e-83
AO090001000598	2	1563663	1564519	856	1237.62	-3.01	0.17	4.396e-70	2.458e-68		AO090005000630	1	4770131	4772059	1928	4408.53	3.24	0.17	2.736e-84	1.466e-82
AO090005000702	1	4571429	4573372	1943	475.1	-2.28	0.13	4.464e-70	2.484e-68		AO090103000025	8	1203033	1204803	1770	7771.93	-4.55	0.24	2.936e-84	1.565e-82
AO090120000287	5	3418874	3421231	2357	3630.08	-2.28	0.13	4.944e-70	2.738e-68		AO090026000183	3	4606561	4607388	827	935.95	4.05	0.21	3.849e-84	2.042e-82
AO090011000323	7	817416	818888	1472	5916.19	1.98	0.11	6.377e-70	3.515e-68		AO090026000187	3	4594841	4597160	2319	3401.8	-6.55	0.34	6.757e-84	3.568e-82
AO090005001212	1	3216747	3218555	1808	6084.86	-1.23	0.07	6.51e-70	3.572e-68		AO090003001259	2	5515531	5517736	2205	6975.12	-6.61	0.34	8.369e-84	4.398e-82
AO090012000452	4	1134660	1136178	1518	6127.41	3.01	0.17	8.499e-70	4.641e-68		AO090001000224	2	540351	541810	1459	15441.2	4.17	0.22	2.267e-83	1.186e-81
AO090011000206	7	534119	536390	2271	187.64	2.83	0.16	1.108e-69	6.021e-68		AO090023000383	3	984890	986294	1404	305	6.12	0.32	2.698e-83	1.405e-81
AO090011000922	7	2409945	2413810	3865	2353.44	-2.68	0.15	1.278e-69	6.912e-68		AO090026000826	3	2874119	2876420	2301	12808.5	-5.96	0.31	2.986e-83	1.547e-81
AO090020000345	6	968979	970552	1573	4866.19	1.03	0.06	1.817e-69	9.784e-68		AO090003000211	2	2652999	2654295	1296	15463.3	-4.65	0.24	1.034e-82	5.336e-81
AO090120000305	5	3484498	3487238	2740	6133.79	1.38	0.08	1.929e-69	1.034e-67		AO090011000649	7	1685837	1687535	1698	2794.3	9.63	0.51	1.167e-82	5.99e-81
AO090026000787	3	2994712	2995786	1074	1075.91	2.71	0.15	2.035e-69	1.086e-67		AO090026000066	3	4951340	4954462	3122	901.42	3.56	0.19	1.194e-82	6.102e-81
AO090003000866	2	4443211	4446407	3196	2867.06	-1.56	0.09	2.546e-69	1.352e-67		AO090005000743	1	4441049	4443004	1955	8547.18	-6.7	0.35	1.549e-82	7.882e-81
AO090005001118	1	3448059	3449934	1875	5037.42	1.15	0.07	2.861e-69	1.512e-67		AO090005000767	1	4369042	4370083	1041	1098.51	-6.01	0.32	2.871e-82	1.454e-80
AO090010000541	8	1950287	1951081	794	5323.33	3.64	0.21	3.335e-69	1.755e-67		AO090005000476	1	5177363	5179310	1947	417.05	-3.98	0.21	2.934e-82	1.479e-80
AO090023000783	3	2036138	2037122	984	447.43	-2.42	0.14	3.363e-69	1.761e-67		AO090102000606	4	2885717	2886542	825	2805.22	1.99	0.1	3.022e-82	1.516e-80
AO090102000388	4	3466271	3468049	1778	34268.8	3.65	0.21	4.977e-69	2.595e-67		AO090001000358	2	895955	897850	1895	5708.45	4.95	0.26	3.171e-82	1.584e-80
AO090701000127	5	2001444	2001814	370	2034.78	2.41	0.14	5.853e-68	3.038e-66		AO090005000337	1	5568360	5570541	2181	679.83	-2.88	0.15	3.574e-82	1.777e-80
AO090103000046	8	1134419	1136377	1958	522.29	-1.81	0.1	1.251e-67	6.467e-66		AO090012000843	4	2172232	2172655	423	3757.66	-2.71	0.14	1.393e-81	6.898e-80
AO090003000703	2	3991490	3992066	576	1427.17	-2.5	0.14	1.555e-67	8.001e-66		AO090009000049	1	130570	132170	1600	5476.43	-5.23	0.28	1.881e-81	9.27e-80
AO090026000638	3	3357298	3358506	1208	1322.67	1.83	0.11	1.6e-67	8.194e-66		AO090010000679	8	1627893	1628574	681	1583.55	-4.65	0.24	3.062e-81	1.502e-79
AO090102000173	4	4087278	4088668	1390	5751.57	2.72	0.16	1.04e-66	5.305e-65		AO090026000180	3	4611323	4614763	3440	5396.42	-3.34	0.18	3.843e-81	1.878e-79
AO090009000055	1	159675	164008	4333	2921.25	1.72	0.1	1.198e-66	6.084e-65		AO090001000265	2	659393	662514	3121	1403.24	3.98	0.21	5.28e-81	2.568e-79
AO090038000463	6	2436489	2436964	475	226.52	2.66	0.16	6.28e-66	3.175e-64		AO090012000418	4	1031888	1034730	2842	1911.82	3.9	0.21	6.554e-81	3.174e-79
AO090023000528	3	1386058	1400399	14341	3019.87	-1.89	0.11	6.414e-66	3.228e-64		AO090023000141	3	357872	359126	1254	1688.76	5.2	0.28	1.038e-80	5.003e-79
AO090005001250	1	3104427	3107425	2998	3363.13	-1.39	0.08	1.122e-65	5.625e-64		AO090023000602	3	1585266	1587665	2399	30240.7	-4.3	0.23	1.337e-80	6.417e-79
AO090011000221	7	567036	568429	1393	678.53	1.96	0.12	1.495e-65	7.46e-64		AO090012000555	4	1408184	1409681	1497	1347.22	-3.61	0.19	2.116e-80	1.012e-78
AO090005001451	1	2597201	2598071	870	1930.19	1.45	0.09	1.812e-65	9.004e-64		AO090038000062	6	3504833	3511599	6766	576	-6.33	0.34	3.742e-80	1.781e-78
AO090103000220	8	709556	712315	2759	199.26	4.39	0.26	2.068e-65	1.023e-63		AO090003000218	2	2666260	2667587	1327	1013.75	-2.76	0.15	8.502e-80	4.029e-78
AO090005000086	1	6205403	6206688	1285	9488.51	2.02	0.12	3.147e-65	1.55e-63		AO090103000450	8	131939	132993	1054	7455.84	-7.03	0.38	8.888e-80	4.194e-78
AO090012000888	4	2301906	2302770	864	321.22	-2.55	0.15	3.459e-65	1.697e-63		AO090001000073	2	164912	165830	918	789.03	-6.34	0.34	9.858e-80	4.632e-78
AO090003000023	2	2150778	2154484	3706	2006.67	-2	0.12	3.542e-65	1.73e-63		AO090120000106	5	2945022	2946786	1764	19019	-4.62	0.25	1.672e-79	7.824e-78
AO090010000754	8	1434359	1434980	621	1797.27	1.17	0.07	5.254e-65	2.556e-63		AO090005000148	1	6042738	6043569	831	610.49	-6.84	0.37	1.809e-79	8.427e-78
AO090026000803	3	2944973	2946686	1713	207.51	2.75	0.16	7.462e-65	3.614e-63		AO090011000292	7	743779	745278	1499	3946	3.54	0.19	2.649e-79	1.229e-77
AO090011000614	7	1573459	1574580	1121	5209.98	-2.16	0.13	7.658e-65	3.694e-63		AO090005000456	1	5236847	5238286	1439	16222.7	3.92	0.21	5.718e-79	2.642e-77
AO090103000396	8	260365	263125	2760	778.11	2.97	0.18	9.772e-65	4.694e-63		AO090102000470	4	3245946	3247785	1839	11946.8	-3.9	0.21	5.977e-79	2.75e-77
AO090005001296	1	2945542	2947503	1961	1400.37	1.62	0.1	1.166e-64	5.58e-63		AO090005000706	1	4560902	4562450	1548	1205.35	3.08	0.16	6.074e-79	2.783e-77
AO090102000470	4	3245946	3247785	1839	1590.8	-1.99	0.12	1.898e-64	9.043e-63		AO090012000029	4	60880	62392	1512	6849.31	-6.68	0.36	1.008e-78	4.599e-77
AO090003000761	2	4139638	4140743	1105	470.58	2.06	0.12	2.189e-64	1.038e-62		AO090011000195	7	502760	503368	608	11704.3	-6.45	0.35	1.107e-78	5.03e-77
AO090701000599	5	777342	778599	1257	269.26	-3.1	0.18	2.385e-64	1.127e-62		AO090009000063	1	179199	180216	1017	4038.67	-2.96	0.16	1.801e-78	8.154e-77
AO090003001260	2	5519587	5521145	1558	640.51	-3.11	0.19	2.47e-64	1.162e-62		AO090103000036	8	1168608	1170328	1720	497.69	-3.37	0.18	4.781e-78	2.155e-76
AO090009000314	1	837656	839475	1819	22439	-2.85	0.17	2.73e-64	1.28e-62		AO090023000837	3	2184550	2187077	2527	124779	2.65	0.14	8.326e-78	3.738e-76
AO090003000481	2	3384500	3386955	2455	13601.7	2.65	0.16	3.435e-64	1.603e-62		AO090003000070	2	2280288	2281412	1124	4016.71	2.3	0.12	1.106e-77	4.945e-76
AO090011000515	7	1290405	1296056	5651	3265.62	-1.32	0.08	4.205e-64	1.955e-62		AO090003001007	2	4823588	4824803	1215	898.02	5.67	0.31	1.985e-77	8.84e-76
AO090038000255	6	2993413	2995831	2418	1635.3	-2.3	0.14	6.924e-64	3.206e-62		AO090026000217	3	4503873	4505862	1989	866.64	-3.88	0.21	2.433e-77	1.079e-75
AO090010000644	8	1708315	1709569	1254	108290	-1.88	0.11	1.104e-63	5.094e-62		AO090038000357	6	2733877	2735348	1471	37845.8	3.03	0.16	2.808e-77	1.241e-75
AO090011000553	7	1395770	1397527	1757	5469.6	-1.47	0.09	1.246e-63	5.723e-62		AO090009000682	1	1831188	1832448	1260	3689.24	3.42	0.19	3.042e-77	1.339e-75
AO090003000047	2	2213453	2214995	1542	1656.24	1.92	0.11	1.454e-63	6.651e-62		AO090020000216	6	1282636	1284253	1617	18609.7	-6.29	0.34	5.292e-77	2.32e-75
AO090023000896	3	2345727	2347975	2248	24494.8	2.23	0.13	2.394e-63	1.091e-61		AO090012000378	4	931081	931836	755	1895.56	-3.43	0.19	8.656e-77	3.779e-75
AO090023000604	3	1590174	1590927	753	2713.04	1.57	0.09	2.53e-63	1.148e-61		AO090010000463	8	2156268	2157582	1314	48647.1	4.13	0.22	8.817e-77	3.834e-75
AO090103000347	8	379723	385023	5300	8785.57	-1.33	0.08	3.217e-63	1.455e-61		AO090023000450	3	1148971	1150552	1581	709.52	-5.14	0.28	1.101e-76	4.771e-75
AO090011000848	7	2170269	2171322	1053	3359.63	-2.58	0.16	5.922e-63	2.667e-61		AO090023000893	3	2337724	2339115	1391	7052.79	2.11	0.11	3.093e-76	1.335e-74
AO090001000310	2	787236	788442	1206	399.93	4.07	0.25	1.02e-62	4.575e-61		AO090020000337	6	987476	988325	849	712.32	3.62	0.2	7.173e-76	3.083e-74
AO090003000482	2	3388363	3389340	977	1229.1	1.25	0.08	2.425e-62	1.084e-60		AO090701000684	5	570196	573010	2814	1524.06	2.58	0.14	7.38e-76	3.16e-74
AO090003000243	2	2738232	2739812	1580	3480.74	-1.87	0.11	3.579e-62	1.594e-60		AO090026000267	3	4353179	4354066	887	27572.3	3.22	0.18	9.832e-76	4.193e-74
AO090001000356	2	890274	891599	1325	1687.4	1.88	0.11	3.785e-62	1.679e-60		AO090011000447	7	1128937	1131777	2840	3964.66	-2.69	0.15	1.117e-75	4.745e-74
AO090026000697	3	3214545	3215331	786	2085.98	2.12	0.13	5.4e-62	2.386e-60		AO090003000212	2	2654470	2655172	702	4119.41	-5.12	0.28	1.452e-75	6.146e-74
AO090020000666	6	137691	138781	1090	132.61	3.16	0.19	7.739e-62	3.406e-60		AO090003001248	2	5487772	5489178	1406	2915	-5.11	0.28	2.374e-75	1.001e-73
AO090012000230	4	568989	571664	2675	6133.9	-1.22	0.07	1.144e-61	5.017e-60		AO090009000022	1	68906	70742	1836	1788.01	-3.4	0.19	3.269e-75	1.373e-73
AO090038000427	6	2531303	2531951	648	2913.84	2.42	0.15	1.263e-61	5.515e-60		AO090005000320	1	5602046	5603663	1617	733.39	-5.75	0.32	1.054e-74	4.409e-73
AO090701000417	5	1242794	1244723	1929	280.63	-3.41	0.21	1.328e-61	5.78e-60		AO090003001046	2	4904964	4906425	1461	5513.18	3.78	0.21	1.41e-74	5.88e-73
AO090005000035	1	6341733	6342686	953	706.04	-2.64	0.16	1.848e-61	8.011e-60		AO090001000549	2	1431881	1433768	1887	8105.73	-4.51	0.25	1.462e-74	6.072e-73
AO090023000413	3	1056739	1057169	430	423.07	-3.29	0.2	2.945e-61	1.272e-59		AO090005001211	1	3221746	3223128	1382	1699.55	4.02	0.22	1.654e-74	6.842e-73
AO090003001036	2	4885880	4887257	1377	1073.24	-1.52	0.09	3.101e-61	1.334e-59		AO090011000198	7	508648	511435	2787	461.93	-4.44	0.24	1.783e-74	7.348e-73
AO090010000363	8	2387961	2388837	876	887.05	3.08	0.19	4.985e-61	2.137e-59		AO090005000638	1	4750251	4751202	951	9120.79	-4.41	0.24	2.596e-74	1.066e-72
AO090020000091	6	1574227	1578187	3960	2579.69	1.56	0.1	6.037e-61	2.579e-59		AO090012000751	4	1908030	1909209	1179	2564.76	-6.83	0.38	2.668e-74	1.092e-72
AO090102000065	4	4377099	4378767	1668	3546.74	2.37	0.14	8.129e-61	3.459e-59		AO090005001647	1	2024296	2026083	1787	5182.48	-4.37	0.24	3.528e-74	1.438e-72
AO090023000234	3	588192	593424	5232	1128.82	-1.35	0.08	1.106e-60	4.689e-59		AO090011000066	7	200099	201653	1554	806.61	-2.53	0.14	4.213e-74	1.711e-72
AO090003000045	2	2211195	2211962	767	2235.61	-3.43	0.21	1.211e-60	5.115e-59		AO090206000077	7	2788988	2790047	1059	1265.94	2.47	0.14	4.821e-74	1.951e-72
AO090011000484	7	1210783	1211395	612	5595.9	1.22	0.07	1.409e-60	5.93e-59		AO090103000145	8	891472	893246	1774	5419.96	-6.7	0.37	5.214e-74	2.102e-72
AO090005000575	1	4933521	4934253	732	1321.33	1.2	0.07	1.858e-60	7.791e-59		AO090003000163	2	2541052	2541634	582	1004.77	2.96	0.16	5.292e-74	2.126e-72
AO090038000078	6	3474040	3475541	1501	692.73	5.62	0.35	2.08e-60	8.691e-59		AO090103000359	8	337853	338867	1014	866.05	-5.08	0.28	8.599e-74	3.442e-72
AO090113000051	5	4168109	4168465	356	6211.17	-1.28	0.08	2.638e-60	1.098e-58		AO090026000149	3	4696779	4704262	7483	593.21	-3.59	0.2	9.642e-74	3.846e-72
AO090010000708	8	1552451	1553339	888	301.8	3.97	0.25	3.021e-60	1.253e-58		AO090005001442	1	2614719	2615968	1249	2123.08	3.35	0.19	1.174e-73	4.667e-72
AO090010000448	8	2191732	2192368	636	10553.3	3.48	0.22	3.449e-60	1.426e-58		AO090026000481	3	3765117	3765647	530	2232.96	-2.47	0.14	1.326e-73	5.252e-72
AO090103000108	8	991280	992031	751	196.87	4.06	0.25	9.571e-60	3.943e-58		AO090011000152	7	414921	415990	1069	741.21	8.92	0.5	1.652e-73	6.519e-72
AO090124000015	5	2646192	2647461	1269	525.65	4.54	0.28	1.255e-59	5.153e-58		AO090005000217	1	5863879	5865484	1605	2639.79	-6.3	0.35	2.664e-73	1.048e-71
AO090009000200	1	535745	537161	1416	1421.14	1.36	0.08	1.342e-59	5.491e-58		AO090005001308	1	2923396	2924508	1112	719.42	-5.01	0.28	3.13e-73	1.226e-71
AO090120000300	5	3468953	3473718	4765	3959.93	-1.25	0.08	2.259e-59	9.207e-58		AO090012000996	4	2582273	2583570	1297	3976.32	2.62	0.15	6.394e-73	2.497e-71
AO090005001430	1	2632455	2633887	1432	6147.82	1.82	0.11	2.288e-59	9.294e-58		AO090003001505	2	6120336	6121001	665	501.86	-3.47	0.19	8.879e-73	3.455e-71
AO090003000794	2	4220030	4221029	999	364.28	-2.34	0.14	2.39e-59	9.64e-58		AO090012000376	4	928073	929659	1586	1014.32	-6.61	0.37	9.357e-73	3.628e-71
AO090011000231	7	592016	593680	1664	3410.34	-2.57	0.16	2.386e-59	9.64e-58		AO090020000403	6	814773	817836	3063	219645	2.78	0.16	1.201e-72	4.639e-71
AO090038000235	6	3043828	3045226	1398	555.55	-2.57	0.16	2.676e-59	1.076e-57		AO090011000417	7	1062197	1063548	1351	577.9	8.93	0.5	2.294e-72	8.834e-71
AO090003000753	2	4116149	4117666	1517	1369.63	-1.97	0.12	2.717e-59	1.088e-57		AO090023000804	3	2092100	2092843	743	390.06	-5.58	0.31	2.426e-72	9.308e-71
AO090003000154	2	2509335	2511109	1774	2133.08	1.43	0.09	2.92e-59	1.166e-57		AO090026000131	3	4750602	4752566	1964	980.97	-5.44	0.31	2.7e-72	1.032e-70
AO090009000634	1	1692244	1693446	1202	239896	2.73	0.17	4.376e-59	1.741e-57		AO090005001561	1	2247458	2248740	1282	5099.52	2.63	0.15	2.731e-72	1.041e-70
AO090011000368	7	945779	947110	1331	3308.72	-2.02	0.13	4.851e-59	1.923e-57		AO090003000205	2	2641669	2643260	1591	19638.4	7.15	0.4	3.4e-72	1.291e-70
AO090005000587	1	4892902	4893748	846	258.24	3.06	0.19	9.723e-59	3.841e-57		AO090011000747	7	1911699	1914721	3022	3290.4	-3.85	0.22	4.245e-72	1.606e-70
AO090023000908	3	2379593	2380897	1304	3658.7	1.1	0.07	1.01e-58	3.976e-57		AO090102000067	4	4373977	4375135	1158	821.64	-7.57	0.43	5.594e-72	2.11e-70
AO090011000040	7	109145	115780	6635	738.54	-2.82	0.18	1.019e-58	3.999e-57		AO090038000416	6	2554186	2555322	1136	781.34	-3.61	0.2	5.725e-72	2.152e-70
AO090113000012	5	4074419	4076444	2025	1357.9	-1.54	0.1	1.528e-58	5.976e-57		AO090701000388	5	1321172	1321916	744	1313.69	-4	0.22	5.803e-72	2.174e-70
AO090011000132	7	366419	367441	1022	1162.03	3.09	0.19	1.828e-58	7.126e-57		AO090005000815	1	4235436	4236361	925	3723.38	-2.74	0.15	7.777e-72	2.904e-70
AO090012000996	4	2582273	2583570	1297	6992.57	1.57	0.1	1.872e-58	7.272e-57		AO090005001282	1	3012957	3015081	2124	25108.3	-3.23	0.18	9.433e-72	3.51e-70
AO090011000209	7	544257	545169	912	557.98	2.95	0.18	1.953e-58	7.563e-57		AO090124000067	5	2515131	2516898	1767	782.32	-3.97	0.22	1.209e-71	4.486e-70
AO090023000273	3	711630	712632	1002	753.13	1.95	0.12	2.902e-58	1.12e-56		AO090010000555	8	1921427	1922220	793	677.61	-4.87	0.27	2.114e-71	7.813e-70
AO090038000171	6	3235133	3236563	1430	266.24	-4.25	0.27	4.753e-58	1.828e-56		AO090138000122	6	3934331	3935188	857	1110.61	-5.59	0.32	2.623e-71	9.664e-70
AO090023000645	3	1691827	1694583	2756	18946.1	-1.14	0.07	6.163e-58	2.362e-56		AO090010000556	8	1920179	1921255	1076	614.08	-4.82	0.27	2.929e-71	1.076e-69
AO090103000085	8	1041149	1043178	2029	2114.55	-3.34	0.21	9.03e-58	3.45e-56		AO090003001390	2	5850804	5853273	2469	12219.6	2.63	0.15	3.347e-71	1.225e-69
AO090120000479	5	3969886	3971651	1765	3991.84	1.08	0.07	1.094e-57	4.167e-56		AO090102000095	4	4303451	4304174	723	928.06	-4.58	0.26	3.659e-71	1.335e-69
AO090009000472	1	1243383	1244643	1260	3767.91	1.3	0.08	1.409e-57	5.348e-56		AO090003001484	2	6061575	6062211	636	1832.64	4.74	0.27	4.687e-71	1.704e-69
AO090102000418	4	3388156	3390622	2466	812.44	1.5	0.09	1.693e-57	6.404e-56		AO090005000022	1	6364313	6365813	1500	1878.91	3.07	0.17	4.881e-71	1.769e-69
AO090012000706	4	1795057	1796705	1648	347.18	-3.28	0.21	2.277e-57	8.586e-56		AO090003001496	2	6091477	6092379	902	8661.38	5.73	0.32	6.068e-71	2.192e-69
AO090701000575	5	829295	830093	798	1047.94	-1.5	0.09	2.441e-57	9.175e-56		AO090003000571	2	3618149	3620453	2304	9444.17	2.25	0.13	6.906e-71	2.486e-69
AO090011000306	7	777628	779211	1583	464.41	-2.24	0.14	2.582e-57	9.671e-56		AO090701000172	5	1882361	1884417	2056	4400.86	3.12	0.18	1.77e-70	6.352e-69
AO090003000222	2	2678883	2682096	3213	3852.17	1.36	0.09	2.625e-57	9.803e-56		AO090103000146	8	889375	891134	1759	1450.07	-4.03	0.23	2.679e-70	9.583e-69
AO090001000716	2	1897445	1899066	1621	7253.56	2.85	0.18	2.969e-57	1.105e-55		AO090011000538	7	1345923	1347711	1788	8367.4	-3.1	0.18	3.044e-70	1.085e-68
AO090026000158	3	4672378	4674592	2214	1141.7	-1.98	0.13	3.949e-57	1.465e-55		AO090005000031	1	6349785	6351099	1314	4251.42	2.34	0.13	4.303e-70	1.529e-68
AO090026000719	3	3156914	3158751	1837	5058.3	1.91	0.12	4.396e-57	1.626e-55		AO090003000629	2	3785232	3789195	3963	4409.57	2.69	0.15	7.629e-70	2.703e-68
AO090011000617	7	1579028	1582541	3513	12618.6	1.64	0.1	4.9e-57	1.806e-55		AO090120000052	5	2797912	2801326	3414	25773.2	-4.16	0.24	8.152e-70	2.879e-68
AO090026000391	3	4007247	4008620	1373	1236.72	1.4	0.09	5.756e-57	2.115e-55		AO090026000278	3	4327615	4329604	1989	1071.5	-2.65	0.15	8.643e-70	3.043e-68
AO090005000804	1	4263257	4265819	2562	2134.64	2.49	0.16	5.915e-57	2.167e-55		AO090003000023	2	2150778	2154484	3706	8821.07	-3.22	0.18	3.044e-69	1.068e-67
AO090120000135	5	3017245	3018632	1387	3331.81	2.1	0.13	8.933e-57	3.262e-55		AO090003001357	2	5774503	5775202	699	340.7	3.63	0.21	3.506e-69	1.227e-67
AO090102000190	4	4045292	4045890	598	36958	-3.12	0.2	1.243e-56	4.525e-55		AO090012000877	4	2278953	2280155	1202	6740.82	3.03	0.17	3.765e-69	1.313e-67
AO090011000900	7	2328467	2330761	2294	1251.24	-1.29	0.08	1.357e-56	4.925e-55		AO090103000082	8	1047816	1049618	1802	1541.13	2.72	0.16	9.531e-69	3.313e-67
AO090005001453	1	2587041	2588300	1259	1053.07	-3.18	0.2	1.726e-56	6.225e-55		AO090026000842	3	2812159	2813899	1740	11853.9	2.15	0.12	1.47e-68	5.095e-67
AO090009000588	1	1558693	1560034	1341	208.12	-3.03	0.19	1.721e-56	6.225e-55		AO090010000208	8	2843739	2846485	2746	2365.19	-1.98	0.11	2.368e-68	8.18e-67
AO090010000208	8	2843739	2846485	2746	1072.67	-1.51	0.1	2.173e-56	7.812e-55		AO090103000376	8	300092	303453	3361	885.58	-2.48	0.14	3.128e-68	1.077e-66
AO090001000164	2	372876	373462	586	34326	3.61	0.23	2.28e-56	8.162e-55		AO090023000728	3	1915635	1917205	1570	2104.57	4.33	0.25	4.491e-68	1.542e-66
AO090005000354	1	5532500	5534039	1539	1616.03	-1.27	0.08	2.284e-56	8.162e-55		AO090001000378	2	951563	952488	925	2940.58	1.89	0.11	5.068e-68	1.734e-66
AO090124000047	5	2570943	2572695	1752	3666.36	-2.24	0.14	2.657e-56	9.465e-55		AO090005000262	1	5738257	5739966	1709	587.83	-3.43	0.2	5.156e-68	1.759e-66
AO090011000446	7	1126660	1127925	1265	3240.74	-2.51	0.16	2.875e-56	1.021e-54		AO090102000047	4	4426372	4428829	2457	671.84	-5.24	0.3	8.778e-68	2.986e-66
AO090005001312	1	2915894	2917454	1560	9614.98	2.35	0.15	2.903e-56	1.028e-54		AO090023000722	3	1903557	1904812	1255	2417.25	-3.68	0.21	1.066e-67	3.614e-66
AO090023000977	3	2583567	2584961	1394	19865.5	1.02	0.07	3.589e-56	1.267e-54		AO090011000236	7	605269	605809	540	1285.26	-6.59	0.38	1.248e-67	4.218e-66
AO090102000613	4	2871824	2874692	2868	1764.71	1.83	0.12	3.612e-56	1.271e-54		AO090005001074	1	3577456	3578625	1169	435.9	7.08	0.41	1.95e-67	6.573e-66
AO090102000167	4	4107276	4107683	407	737.38	2.08	0.13	3.754e-56	1.317e-54		AO090011000588	7	1491049	1492083	1034	31889.6	4.83	0.28	2.276e-67	7.647e-66
AO090011000687	7	1766535	1767654	1119	856.71	1.6	0.1	4.835e-56	1.691e-54		AO090003000210	2	2650980	2652488	1508	17522.4	-5.05	0.29	3.971e-67	1.33e-65
AO090023000526	3	1380308	1382269	1961	1861.83	1.12	0.07	1.009e-55	3.517e-54		AO090023000399	3	1022502	1024795	2293	877.2	-7.16	0.42	4.977e-67	1.662e-65
AO090009000066	1	186297	187301	1004	788.05	-2.14	0.14	1.056e-55	3.669e-54		AO090102000483	4	3217559	3219762	2203	7435.31	-5.76	0.34	5.278e-67	1.758e-65
AO090005001525	1	2365470	2366864	1394	2281.05	-1.97	0.13	1.213e-55	4.204e-54		AO090003000261	2	2785342	2786628	1286	23758.2	-7.01	0.41	5.609e-67	1.862e-65
AO090023001009	3	2654074	2654654	580	19768.6	1.44	0.09	2.007e-55	6.935e-54		AO090023000469	3	1204630	1205452	822	1718.02	2.46	0.14	6.533e-67	2.162e-65
AO090023000857	3	2237413	2238653	1240	5114.74	2.35	0.15	2.27e-55	7.82e-54		AO090005000562	1	4955724	4956447	723	908.45	-5.55	0.32	6.69e-67	2.208e-65
AO090026000778	3	3010432	3013441	3009	1373.35	2.9	0.19	2.74e-55	9.412e-54		AO090020000347	6	966907	967893	986	2118.57	3.89	0.23	1.205e-66	3.965e-65
AO090026000173	3	4632632	4634063	1431	840.56	-1.8	0.12	3.486e-55	1.194e-53		AO090005000159	1	6007121	6008211	1090	1090.92	2.63	0.15	1.354e-66	4.442e-65
AO090011000275	7	706504	707971	1467	2283.16	3.46	0.22	4.233e-55	1.445e-53		AO090005001451	1	2597201	2598071	870	1559.85	2.31	0.14	1.752e-66	5.73e-65
AO090001000031	2	69826	71482	1656	257.65	-2.77	0.18	5.268e-55	1.794e-53		AO090124000079	5	2488107	2489440	1333	16778.5	2.52	0.15	2.099e-66	6.845e-65
AO090020000072	6	1621755	1623534	1779	2581.85	-1.17	0.08	5.74e-55	1.949e-53		AO090012000065	4	148343	150170	1827	927.85	-6.51	0.38	2.186e-66	7.108e-65
AO090005001074	1	3577456	3578625	1169	1266.16	1.51	0.1	9.349e-55	3.165e-53		AO090003000055	2	2234548	2236118	1570	113222	2.4	0.14	2.787e-66	9.035e-65
AO090001000184	2	421593	422928	1335	1691.41	-2.78	0.18	9.46e-55	3.193e-53		AO090038000569	6	2112185	2113034	849	52350.8	-5.03	0.29	3.04e-66	9.827e-65
AO090011000378	7	960278	965073	4795	1998.11	-1.53	0.1	1.26e-54	4.239e-53		AO090009000410	1	1082193	1084068	1875	1474.79	-3.81	0.22	3.116e-66	1.005e-64
AO090009000568	1	1494693	1496210	1517	5361.98	-1.53	0.1	1.328e-54	4.455e-53		AO090010000714	8	1540591	1541935	1344	374.2	5.87	0.35	8.499e-66	2.732e-64
AO090005000852	1	4134194	4135088	894	573.79	-2.26	0.15	1.443e-54	4.829e-53		AO090026000111	3	4801558	4806432	4874	1105.32	-4.65	0.27	1.084e-65	3.473e-64
AO090001000295	2	753676	756269	2593	2635.77	-1.05	0.07	1.839e-54	6.135e-53		AO090003001082	2	5030094	5030915	821	7590.73	2.24	0.13	2.471e-65	7.895e-64
AO090701000344	5	1427848	1429109	1261	3086.55	-2.06	0.13	1.846e-54	6.141e-53		AO090005000423	1	5340468	5341268	800	456.11	-5.51	0.33	2.665e-65	8.491e-64
AO090701000190	5	1831772	1833587	1815	896.43	2.2	0.14	1.874e-54	6.215e-53		AO090005000019	1	6369857	6371850	1993	553.87	-5.63	0.33	3.337e-65	1.06e-63
AO090206000060	7	2737850	2739801	1951	3881.23	-1.63	0.11	1.995e-54	6.599e-53		AO090001000381	2	957547	960460	2913	2807	-4.01	0.24	3.634e-65	1.151e-63
AO090003000915	2	4573771	4580137	6366	2464.43	-1.02	0.07	2.72e-54	8.971e-53		AO090023000614	3	1611514	1613421	1907	17255	-3.6	0.21	4.612e-65	1.457e-63
AO090120000042	5	2782163	2783089	926	4432.69	-1.3	0.08	2.808e-54	9.233e-53		AO090020000314	6	1046383	1047582	1199	7761.28	2.82	0.17	6.296e-65	1.983e-63
AO090005000860	1	4120292	4121438	1146	865.4	-1.59	0.1	2.903e-54	9.52e-53		AO090113000012	5	4074419	4076444	2025	3930.04	-1.91	0.11	9.88e-65	3.104e-63
AO090009000294	1	783272	784877	1605	3551.5	2.07	0.13	2.92e-54	9.55e-53		AO090003001112	2	5121793	5124068	2275	65725.9	-2.43	0.14	1.422e-64	4.455e-63
AO090023000200	3	500033	501327	1294	1126.64	2.86	0.19	4.386e-54	1.43e-52		AO090003000704	2	3995054	3995516	462	1801.54	-2.7	0.16	1.559e-64	4.87e-63
AO090020000109	6	1530564	1531575	1011	4090.04	2.51	0.16	5.747e-54	1.869e-52		AO090001000717	2	1906296	1910386	4090	75800.6	-3.79	0.23	2.052e-64	6.392e-63
AO090102000025	4	4484684	4485086	402	324.28	-2.08	0.14	5.858e-54	1.899e-52		AO090020000180	6	1375475	1376703	1228	2758.38	1.87	0.11	2.407e-64	7.475e-63
AO090003000043	2	2203902	2206473	2571	9787.2	3.61	0.24	6.001e-54	1.94e-52		AO090103000469	8	88776	90457	1681	939	-2.57	0.15	2.546e-64	7.888e-63
AO090003001127	2	5177766	5178961	1195	938.88	-1.66	0.11	9.506e-54	3.065e-52		AO090011000845	7	2162100	2163639	1539	2552.43	2.3	0.14	2.764e-64	8.537e-63
AO090012000395	4	973701	974882	1181	679.35	2.81	0.18	9.936e-54	3.195e-52		AO090012000154	4	368755	369912	1157	8069.67	-2.06	0.12	3.084e-64	9.498e-63
AO090023000021	3	55158	56100	942	2261.39	3.37	0.22	1.268e-53	4.068e-52		AO090138000173	6	3776680	3780007	3327	545.02	-3.03	0.18	3.378e-64	1.038e-62
AO090010000740	8	1475378	1476552	1174	303.05	-3.78	0.25	1.284e-53	4.106e-52		AO090011000413	7	1053885	1055459	1574	1344.88	6.33	0.38	4.114e-64	1.26e-62
AO090701000893	5	35210	37247	2037	521.32	-3.04	0.2	1.326e-53	4.228e-52		AO090005000758	1	4411837	4412601	764	1050.71	2.98	0.18	5.225e-64	1.596e-62
AO090102000079	4	4332954	4334676	1722	2154.01	-1.79	0.12	1.465e-53	4.659e-52		AO090005000100	1	6174735	6175231	496	1276.12	1.98	0.12	6.353e-64	1.935e-62
AO090001000131	2	295916	296525	609	1325.53	-2.33	0.15	2.159e-53	6.83e-52		AO090010000742	8	1469325	1473191	3866	741.21	-4.73	0.28	8.859e-64	2.691e-62
AO090005001564	1	2241722	2243340	1618	1135.93	-1.83	0.12	2.154e-53	6.83e-52		AO090012000607	4	1546015	1548935	2920	670.74	-2.23	0.13	1.459e-63	4.42e-62
AO090113000146	5	4392509	4394058	1549	292.86	-2.82	0.18	2.192e-53	6.913e-52		AO090023000026	3	71756	73440	1684	1212.22	-6.54	0.39	1.848e-63	5.585e-62
AO090005000358	1	5521642	5522854	1212	501.16	1.94	0.13	2.589e-53	8.143e-52		AO090003000513	2	3460236	3460939	703	951.08	2.27	0.14	2.091e-63	6.302e-62
AO090011000302	7	761830	762769	939	2812.78	-3.09	0.2	3.088e-53	9.689e-52		AO090010000667	8	1652574	1653568	994	8321.79	7.15	0.43	2.645e-63	7.949e-62
AO090003000118	2	2406941	2410779	3838	3571.38	-1.25	0.08	3.448e-53	1.079e-51		AO090005000324	1	5594014	5595659	1645	437.28	-6.94	0.42	2.686e-63	8.05e-62
AO090003000910	2	4560635	4561064	429	481.44	-3.16	0.21	3.629e-53	1.132e-51		AO090003001421	2	5921564	5924717	3153	1299.26	-3.32	0.2	2.718e-63	8.125e-62
AO090023000687	3	1806771	1807770	999	4579.8	2.7	0.18	3.741e-53	1.164e-51		AO090005000085	1	6207315	6208222	907	2163.25	2.07	0.12	3.139e-63	9.359e-62
AO090003000364	2	3069324	3071752	2428	5846.18	1.53	0.1	3.979e-53	1.235e-51		AO090011000024	7	64681	66201	1520	323.41	-3.46	0.21	3.181e-63	9.457e-62
AO090701000669	5	613479	615033	1554	833.57	2.32	0.15	4.286e-53	1.327e-51		AO090012000565	4	1438780	1440792	2012	10385.6	5.1	0.31	7.088e-63	2.102e-61
AO090120000273	5	3393882	3394567	685	1722.99	1.19	0.08	4.77e-53	1.472e-51		AO090020000195	6	1328277	1329923	1646	1317.15	3.1	0.19	7.769e-63	2.297e-61
AO090012000701	4	1778987	1779944	957	805.87	-2.58	0.17	5.384e-53	1.657e-51		AO090020000151	6	1430584	1433569	2985	1230.34	-3.55	0.21	8.414e-63	2.481e-61
AO090001000431	2	1083566	1084736	1170	1233.9	-2.82	0.19	5.524e-53	1.696e-51		AO090020000267	6	1154679	1156618	1939	583.6	-4.7	0.28	9.228e-63	2.714e-61
AO090012000513	4	1306751	1308830	2079	977.41	-1.5	0.1	9.601e-53	2.94e-51		AO090010000350	8	2421028	2425025	3997	699.84	5.93	0.36	1.22e-62	3.579e-61
AO090003000413	2	3182416	3185385	2969	1773.17	1.63	0.11	1.746e-52	5.333e-51		AO090010000593	8	1831025	1833135	2110	575.75	-5.03	0.3	1.443e-62	4.223e-61
AO090005000639	1	4743500	4745303	1803	3582.27	-1.08	0.07	1.99e-52	6.063e-51		AO090001000509	2	1308567	1312121	3554	9296.02	-2.65	0.16	1.704e-62	4.971e-61
AO090206000080	7	2796991	2799027	2036	3306.45	-3.29	0.22	2.249e-52	6.832e-51		AO090005001309	1	2922573	2923218	645	450.88	-5.02	0.3	1.862e-62	5.419e-61
AO090012000314	4	773451	773982	531	761.18	-3.36	0.22	2.358e-52	7.147e-51		AO090003001413	2	5901449	5902883	1434	3607.51	-3.49	0.21	1.875e-62	5.442e-61
AO090011000920	7	2403696	2404810	1114	2551.6	2.75	0.18	2.497e-52	7.528e-51		AO090102000335	4	3635238	3636108	870	4436.23	3.66	0.22	2.378e-62	6.884e-61
AO090102000063	4	4383607	4384529	922	112.54	4.58	0.31	2.492e-52	7.528e-51		AO090003000497	2	3427034	3428538	1504	1406.84	-3.34	0.2	3.322e-62	9.594e-61
AO090003000241	2	2733174	2734189	1015	20164.5	2.2	0.15	3.319e-52	9.98e-51		AO090102000190	4	4045292	4045890	598	1940.4	-3.33	0.2	5.159e-62	1.486e-60
AO090005000482	1	5155981	5158057	2076	236.87	2.48	0.16	3.379e-52	1.013e-50		AO090026000555	3	3563606	3565164	1558	1360.9	-2.97	0.18	6.226e-62	1.789e-60
AO090001000110	2	251039	251442	403	4025.68	-1.56	0.1	3.776e-52	1.13e-50		AO090001000200	2	461689	463782	2093	1263.56	-4.67	0.28	2.379e-61	6.815e-60
AO090005000828	1	4201334	4203068	1734	4481.48	2.62	0.17	4.054e-52	1.21e-50		AO090026000443	3	3873934	3874939	1005	1360.29	-2.57	0.16	2.42e-61	6.917e-60
AO090023000011	3	29812	31114	1302	435.21	2.45	0.16	4.313e-52	1.283e-50		AO090005001231	1	3161692	3166027	4335	854.94	2.97	0.18	2.622e-61	7.474e-60
AO090003000495	2	3420889	3423157	2268	2198.46	-2.85	0.19	5.288e-52	1.57e-50		AO090003000823	2	4306187	4307275	1088	1190.52	-4.71	0.29	3.013e-61	8.568e-60
AO090102000535	4	3073174	3073808	634	2381.1	1.72	0.11	5.953e-52	1.763e-50		AO090020000289	6	1101041	1103538	2497	10198.9	-7.13	0.44	4.134e-61	1.172e-59
AO090003001129	2	5184089	5185286	1197	2102.48	-1.82	0.12	5.992e-52	1.769e-50		AO090026000648	3	3335122	3335802	680	5543.9	-3.33	0.2	6.213e-61	1.758e-59
AO090011000716	7	1832219	1833243	1024	1389.34	1.38	0.09	8.328e-52	2.453e-50		AO090026000651	3	3329752	3331004	1252	22117.2	2.65	0.16	1.03e-60	2.905e-59
AO090003000207	2	2646939	2647407	468	1391.4	3	0.2	9.322e-52	2.739e-50		AO090005001321	1	2882542	2883343	801	805.56	-3.04	0.19	1.366e-60	3.843e-59
AO090120000424	5	3817178	3818880	1702	4643.38	1.62	0.11	9.766e-52	2.862e-50		AO090026000520	3	3665243	3667193	1950	10037	2.41	0.15	2.253e-60	6.326e-59
AO090103000206	8	753177	754181	1004	3373.12	-2.97	0.2	1.101e-51	3.219e-50		AO090102000476	4	3238855	3241116	2261	5160.9	2.94	0.18	2.636e-60	7.382e-59
AO090005001358	1	2802412	2803666	1254	103.38	3.22	0.22	1.121e-51	3.269e-50		AO090010000669	8	1648055	1648879	824	1118.46	-2.44	0.15	3.622e-60	1.012e-58
AO090011000620	7	1590170	1592000	1830	1543.53	-1.96	0.13	1.379e-51	4.01e-50		AO090009000443	1	1157159	1158333	1174	471.57	-3.06	0.19	3.877e-60	1.08e-58
AO090102000092	4	4309554	4310337	783	1074.6	-2.47	0.16	1.723e-51	4.999e-50		AO090026000299	3	4268080	4269578	1498	238.06	4.1	0.25	4.629e-60	1.287e-58
AO090020000170	6	1390910	1392663	1753	1272.56	-2.63	0.18	1.743e-51	5.045e-50		AO090023000004	3	7650	8039	389	1275.48	-7.3	0.45	5.179e-60	1.436e-58
AO090009000366	1	976886	977930	1044	4349.93	-1.28	0.09	1.798e-51	5.189e-50		AO090023000949	3	2509741	2510691	950	400.02	3.88	0.24	6.976e-60	1.929e-58
AO090011000780	7	1981892	1983197	1305	2164.34	1.53	0.1	2.086e-51	5.993e-50		AO090001000559	2	1464145	1465163	1018	1240.3	2.89	0.18	7.209e-60	1.989e-58
AO090103000082	8	1047816	1049618	1802	7043.85	1.71	0.11	2.13e-51	6.102e-50		AO090001000611	2	1597568	1598897	1329	4641.13	-3.14	0.19	7.37e-60	2.028e-58
AO090020000105	6	1540122	1543173	3051	10954.1	-1.05	0.07	2.76e-51	7.889e-50		AO090026000663	3	3288779	3290972	2193	3497.69	1.8	0.11	8.578e-60	2.354e-58
AO090010000755	8	1432293	1434152	1859	1320.04	2.73	0.18	2.769e-51	7.894e-50		AO090003000090	2	2327788	2328830	1042	228518	3.44	0.21	1.125e-59	3.081e-58
AO090012000777	4	1999604	2002845	3241	1369.13	1.4	0.09	2.829e-51	8.048e-50		AO090166000096	4	4821983	4822896	913	839.18	-2.24	0.14	2.728e-59	7.452e-58
AO090026000455	3	3840928	3843173	2245	1538.84	-1.19	0.08	3.339e-51	9.475e-50		AO090103000287	8	532763	533750	987	939.64	-3.96	0.25	2.804e-59	7.641e-58
AO090138000056	6	4079037	4080024	987	928.63	2.23	0.15	3.472e-51	9.826e-50		AO090003001441	2	5965868	5968140	2272	666.7	-4.58	0.28	2.835e-59	7.706e-58
AO090166000070	4	4750013	4751660	1647	7705.76	2.32	0.16	3.505e-51	9.896e-50		AO090138000151	6	3836246	3838634	2388	839.05	-3.81	0.24	3.321e-59	9.003e-58
AO090010000615	8	1784111	1785816	1705	892.32	-2.19	0.15	3.868e-51	1.089e-49		AO090120000075	5	2855234	2856742	1508	666.01	-2.7	0.17	3.962e-59	1.071e-57
AO090102000567	4	2986912	2987947	1035	3161.7	1.12	0.08	4.081e-51	1.147e-49		AO090005001008	1	3735478	3736696	1218	1791.38	2.36	0.15	4.144e-59	1.118e-57
AO090020000131	6	1485246	1487313	2067	2468.22	1.31	0.09	4.547e-51	1.272e-49		AO090701000630	5	706048	707741	1693	387.94	-5.7	0.36	4.204e-59	1.131e-57
AO090026000183	3	4606561	4607388	827	3789.43	1.9	0.13	4.548e-51	1.272e-49		AO090012000341	4	835158	836200	1042	322.91	-6.1	0.38	4.655e-59	1.25e-57
AO090120000241	5	3312490	3314850	2360	1119.14	2.39	0.16	5.303e-51	1.479e-49		AO090023000098	3	245426	247033	1607	440.75	2.64	0.16	5.006e-59	1.341e-57
AO090023000754	3	1973057	1974733	1676	5613.37	-1.37	0.09	5.815e-51	1.618e-49		AO090009000016	1	54641	55184	543	495.53	9.29	0.59	7.669e-59	2.049e-57
AO090038000224	6	3070619	3072633	2014	14100.6	1.26	0.08	6.917e-51	1.92e-49		AO090009000589	1	1561731	1563083	1352	947.48	4.26	0.27	1.036e-58	2.761e-57
AO090010000381	8	2334818	2336089	1271	1553.33	-3.3	0.22	7.046e-51	1.951e-49		AO090009000302	1	801886	803423	1537	289.71	2.72	0.17	1.191e-58	3.167e-57
AO090102000640	4	2799807	2801328	1521	1440.23	-1.5	0.1	7.507e-51	2.074e-49		AO090012000217	4	540303	541488	1185	4946.32	-3.21	0.2	1.276e-58	3.384e-57
AO090103000390	8	271040	272481	1441	780.92	-2.12	0.14	7.935e-51	2.187e-49		AO090011000524	7	1321444	1322609	1165	857.33	-3.51	0.22	1.472e-58	3.895e-57
AO090005000246	1	5780085	5781956	1871	273.17	-3.93	0.27	8.773e-51	2.412e-49		AO090023000717	3	1890252	1892712	2460	2554.58	-3.05	0.19	1.537e-58	4.058e-57
AO090023000996	3	2634279	2635902	1623	3408.65	1.1	0.07	1.077e-50	2.955e-49		AO090012000137	4	334018	335556	1538	19669.6	-5.92	0.37	1.647e-58	4.338e-57
AO090012000783	4	2016066	2017197	1131	8730.42	1.13	0.08	1.14e-50	3.119e-49		AO090005000534	1	5029090	5030560	1470	4059.64	-4.18	0.26	1.663e-58	4.369e-57
AO090011000460	7	1164722	1166180	1458	662.29	-1.52	0.1	1.272e-50	3.474e-49		AO090005001050	1	3635029	3635836	807	5229.58	-6.94	0.44	2.347e-58	6.152e-57
AO090020000070	6	1629667	1632099	2432	925.33	1.46	0.1	1.379e-50	3.755e-49		AO090003000081	2	2308459	2309829	1370	2964.67	2.98	0.19	2.41e-58	6.303e-57
AO090001000707	2	1873701	1875566	1865	14487.9	-1.23	0.08	1.524e-50	4.141e-49		AO090038000042	6	3554902	3557100	2198	538.76	-6.38	0.4	3.177e-58	8.29e-57
AO090023000472	3	1211453	1214887	3434	6452.37	1.15	0.08	1.913e-50	5.185e-49		AO090102000092	4	4309554	4310337	783	16233.8	-4.05	0.25	3.581e-58	9.323e-57
AO090001000178	2	402942	406784	3842	2180.53	1.34	0.09	2.113e-50	5.716e-49		AO090103000445	8	141826	144991	3165	4316.76	-2	0.13	3.776e-58	9.806e-57
AO090102000392	4	3451905	3454629	2724	2282.57	1.61	0.11	3.403e-50	9.183e-49		AO090103000391	8	269953	270709	756	481.75	-3.54	0.22	5.424e-58	1.405e-56
AO090012000551	4	1401812	1403037	1225	13221.6	3.08	0.21	3.562e-50	9.589e-49		AO090001000327	2	833655	835238	1583	10295.8	2.27	0.14	8.048e-58	2.08e-56
AO090023000497	3	1295708	1297190	1482	697.25	-1.45	0.1	3.61e-50	9.695e-49		AO090010000032	8	3322996	3323953	957	401.95	4.4	0.28	8.464e-58	2.183e-56
AO090701000450	5	1158645	1161499	2854	434.68	2.36	0.16	4.481e-50	1.201e-48		AO090103000465	8	101827	102528	701	5930.78	-4.03	0.25	1.204e-57	3.097e-56
AO090023000319	3	812227	813046	819	1770.91	1.82	0.12	4.793e-50	1.278e-48		AO090010000615	8	1784111	1785816	1705	592.3	3.29	0.21	1.821e-57	4.673e-56
AO090102000152	4	4145489	4147231	1742	652.73	-2.31	0.16	4.783e-50	1.278e-48		AO090026000049	3	4992414	4994285	1871	517.36	-7.58	0.48	1.863e-57	4.771e-56
AO090005001300	1	2935544	2937309	1765	86846.2	1.88	0.13	6.361e-50	1.693e-48		AO090003001097	2	5076198	5080650	4452	4558.38	2.63	0.17	2.133e-57	5.45e-56
AO090003000941	2	4644460	4647369	2909	185.5	-3.34	0.23	9.02e-50	2.395e-48		AO090005000144	1	6051137	6053879	2742	486.39	-3.13	0.2	2.413e-57	6.152e-56
AO090113000007	5	4062870	4066616	3746	5101.91	-2.84	0.19	9.204e-50	2.438e-48		AO090003001501	2	6113124	6114564	1440	2233.92	-3.41	0.22	2.681e-57	6.818e-56
AO090012000966	4	2505507	2507496	1989	1563.16	-1.59	0.11	1.09e-49	2.88e-48		AO090003000932	2	4625009	4626041	1032	1113.16	-4.17	0.26	3.134e-57	7.954e-56
AO090102000581	4	2955312	2960061	4749	5260.03	-1.42	0.1	1.164e-49	3.07e-48		AO090020000085	6	1591187	1592607	1420	1823.17	2.42	0.15	3.363e-57	8.514e-56
AO090020000191	6	1340355	1341156	801	2580.99	2.85	0.19	2.249e-49	5.918e-48		AO090003000044	2	2207340	2209411	2071	1778.34	-2.9	0.18	6.927e-57	1.75e-55
AO090038000469	6	2409128	2412762	3634	477.01	3.05	0.21	2.408e-49	6.32e-48		AO090103000470	8	87959	88579	620	441.22	-2.78	0.18	9.59e-57	2.417e-55
AO090005001238	1	3139514	3141933	2419	7079.09	-1.62	0.11	2.43e-49	6.363e-48		AO090001000269	2	675347	677824	2477	884.84	-7.19	0.46	1.051e-56	2.643e-55
AO090120000081	5	2867533	2869693	2160	1227.05	-1.46	0.1	2.828e-49	7.39e-48		AO090005000274	1	5705933	5708245	2312	8998.57	2.67	0.17	1.059e-56	2.656e-55
AO090120000364	5	3651335	3652679	1344	2163.63	1.69	0.12	3.777e-49	9.848e-48		AO090005000166	1	5986432	5988381	1949	4065.17	4.76	0.3	1.061e-56	2.656e-55
AO090010000361	8	2389491	2390748	1257	3693.55	3.33	0.23	4.838e-49	1.259e-47		AO090012000174	4	424042	424507	465	13353.5	4.85	0.31	1.686e-56	4.21e-55
AO090003000206	2	2645270	2646710	1440	2921.54	2.6	0.18	5.535e-49	1.437e-47		AO090003000260	2	2783669	2784933	1264	261.19	-4.66	0.3	2.449e-56	6.103e-55
AO090003000318	2	2960960	2963610	2650	87.39	3.6	0.25	9.212e-49	2.386e-47		AO090003000135	2	2457262	2460057	2795	7580.92	-1.95	0.12	2.989e-56	7.432e-55
AO090010000613	8	1786599	1787678	1079	1369.61	-1.73	0.12	9.474e-49	2.448e-47		AO090005001307	1	2924588	2925457	869	381.73	-5.28	0.34	3.347e-56	8.303e-55
AO090026000571	3	3520950	3523224	2274	9106.21	1.9	0.13	1.117e-48	2.881e-47		AO090003000162	2	2540387	2540994	607	652.24	3.06	0.2	3.535e-56	8.75e-55
AO090701000128	5	1999942	2000828	886	910.44	-1.52	0.1	1.238e-48	3.184e-47		AO090020000610	6	277533	279115	1582	609.44	-3.53	0.23	4.102e-56	1.013e-54
AO090003000006	2	2114679	2115480	801	2877.23	-1.42	0.1	1.362e-48	3.495e-47		AO090023000783	3	2036138	2037122	984	1120.81	-3.36	0.22	4.544e-56	1.12e-54
AO090102000339	4	3604260	3605719	1459	19606	2.95	0.2	1.409e-48	3.608e-47		AO090701000470	5	1115066	1116218	1152	3620.61	-4.26	0.27	5.779e-56	1.421e-54
AO090103000214	8	727593	729496	1903	720.82	4.49	0.31	1.468e-48	3.752e-47		AO090102000284	4	3753040	3753836	796	495.74	-5.75	0.37	7.702e-56	1.889e-54
AO090102000389	4	3460242	3464337	4095	14580.7	2.47	0.17	1.503e-48	3.832e-47		AO090005001041	1	3652535	3653801	1266	306.81	-3.45	0.22	7.828e-56	1.916e-54
AO090701000081	5	2139322	2140986	1664	1988.25	1.12	0.08	1.593e-48	4.052e-47		AO090701000214	5	1770998	1772351	1353	17399.7	2.14	0.14	8.002e-56	1.955e-54
AO090026000661	3	3292675	3295581	2906	1845.68	1.55	0.11	1.614e-48	4.097e-47		AO090003000703	2	3991490	3992066	576	2093.57	-2.59	0.17	8.071e-56	1.967e-54
AO090011000641	7	1652983	1653736	753	1479.03	-1.63	0.11	1.841e-48	4.663e-47		AO090005001148	1	3376496	3378526	2030	2309.76	1.9	0.12	9.082e-56	2.209e-54
AO090010000127	8	3065706	3066813	1107	277.39	2.65	0.18	1.954e-48	4.939e-47		AO090120000232	5	3286237	3288012	1775	14159.6	-3.05	0.2	1.209e-55	2.933e-54
AO090102000503	4	3152467	3155502	3035	2388.89	-1.42	0.1	2.635e-48	6.646e-47		AO090103000336	8	416175	417501	1326	272.45	-6.16	0.4	1.264e-55	3.06e-54
AO090003001249	2	5490149	5491040	891	1250.45	1.83	0.13	3.358e-48	8.45e-47		AO090701000108	5	2078639	2080786	2147	1020.12	1.78	0.11	1.558e-55	3.764e-54
AO090005000628	1	4778217	4778738	521	1936.59	-1.32	0.09	3.734e-48	9.375e-47		AO090020000636	6	202992	204996	2004	830.84	2.27	0.15	2.051e-55	4.945e-54
AO090005000902	1	4011451	4012372	921	697.74	-1.48	0.1	3.941e-48	9.873e-47		AO090010000770	8	1388670	1389531	861	6030.41	-3.19	0.21	2.143e-55	5.156e-54
AO090005000779	1	4340857	4342070	1213	975.63	-1.32	0.09	4.011e-48	1.003e-46		AO090038000233	6	3048337	3049957	1620	3700.02	-4.28	0.28	2.363e-55	5.672e-54
AO090001000377	2	949290	951115	1825	8774.1	2	0.14	4.128e-48	1.03e-46		AO090038000123	6	3352211	3353123	912	355.22	-3.96	0.26	2.856e-55	6.839e-54
AO090020000624	6	229289	230493	1204	1252.87	-1.68	0.12	4.488e-48	1.117e-46		AO090011000034	7	93303	94993	1690	933.15	-4.65	0.3	3.143e-55	7.512e-54
AO090005001321	1	2882542	2883343	801	538.14	-3.11	0.22	5.24e-48	1.302e-46		AO090010000525	8	1984447	1986572	2125	657.34	-6.39	0.41	3.344e-55	7.975e-54
AO090020000355	6	945718	946105	387	498.97	-1.84	0.13	5.333e-48	1.322e-46		AO090010000472	8	2127442	2131258	3816	31784.6	2.78	0.18	4.988e-55	1.187e-53
AO090038000167	6	3241468	3243097	1629	637.81	2.71	0.19	5.475e-48	1.354e-46		AO090005001141	1	3393709	3394456	747	1298.86	-2.71	0.18	6.548e-55	1.555e-53
AO090003000752	2	4114203	4115211	1008	1817.35	-2.53	0.18	8.138e-48	2.009e-46		AO090012000051	4	113983	116038	2055	2056.72	2.55	0.17	7.066e-55	1.674e-53
AO090009000456	1	1188730	1192227	3497	3346.62	-2.16	0.15	9.162e-48	2.257e-46		AO090003000925	2	4607544	4607983	439	1348.93	2.27	0.15	1.043e-54	2.463e-53
AO090003000545	2	3543204	3545258	2054	7743.51	1.76	0.12	1.025e-47	2.519e-46		AO090011000397	7	1016254	1017416	1162	458.86	-2.49	0.16	1.044e-54	2.463e-53
AO090102000592	4	2919873	2921100	1227	1691.63	1.55	0.11	1.072e-47	2.63e-46		AO090003000992	2	4788660	4790338	1678	3157.61	1.92	0.12	1.331e-54	3.133e-53
AO090009000496	1	1316981	1319950	2969	4205.82	2.19	0.15	1.148e-47	2.81e-46		AO090003000611	2	3734901	3736510	1609	5745.18	3.29	0.21	2.841e-54	6.676e-53
AO090005000457	1	5233872	5236079	2207	9409.03	-1.25	0.09	1.16e-47	2.833e-46		AO090138000085	6	4021666	4022734	1068	688.69	-2.73	0.18	4.129e-54	9.68e-53
AO090009000383	1	1025444	1026442	998	1358	-1.99	0.14	1.77e-47	4.315e-46		AO090005000445	1	5268297	5269477	1180	597.32	2.2	0.14	8.626e-54	2.018e-52
AO090003001430	2	5945257	5946531	1274	2895.24	-1.77	0.12	1.842e-47	4.48e-46		AO090023000287	3	736684	738917	2233	307.79	-4.4	0.29	8.791e-54	2.052e-52
AO090011000679	7	1744590	1746152	1562	25726.6	2.6	0.18	1.846e-47	4.48e-46		AO090102000121	4	4223579	4224738	1159	2542.97	1.93	0.13	8.93e-54	2.08e-52
AO090009000709	1	1887901	1892822	4921	6459.82	1.07	0.07	2.191e-47	5.306e-46		AO090003000761	2	4139638	4140743	1105	278.19	3.36	0.22	1.116e-53	2.594e-52
AO090001000681	2	1795486	1797997	2511	3521.23	-1.67	0.12	2.517e-47	6.083e-46		AO090012000035	4	73323	75804	2481	869.65	-6.77	0.45	1.144e-53	2.654e-52
AO090020000419	6	782991	783405	414	663.6	1.84	0.13	2.553e-47	6.158e-46		AO090009000202	1	540637	541744	1107	4543.18	2.64	0.17	1.242e-53	2.875e-52
AO090206000064	7	2751836	2755172	3336	1240.7	-1.23	0.09	2.693e-47	6.482e-46		AO090012000502	4	1268401	1273189	4788	6578.58	2.37	0.16	1.246e-53	2.878e-52
AO090003001250	2	5491379	5492446	1067	3951.25	2.62	0.18	3.047e-47	7.317e-46		AO090020000068	6	1635824	1636502	678	1937.03	-1.58	0.1	1.383e-53	3.188e-52
AO090005000941	1	3908941	3909738	797	1872.74	1.44	0.1	3.238e-47	7.761e-46		AO090701000411	5	1255292	1256738	1446	293.92	-5.26	0.34	1.426e-53	3.282e-52
AO090009000589	1	1561731	1563083	1352	5490.64	1.24	0.09	4.704e-47	1.123e-45		AO090113000029	5	4112906	4114971	2065	467.39	-5.14	0.34	1.693e-53	3.888e-52
AO090010000153	8	3002270	3002912	642	2659.51	1.6	0.11	5.002e-47	1.191e-45		AO090023000123	3	311996	313254	1258	3109.16	3.54	0.23	1.954e-53	4.478e-52
AO090020000430	6	745298	752735	7437	5340.49	-1.72	0.12	5.327e-47	1.266e-45		AO090023000758	3	1983555	1986086	2531	3325.48	2.77	0.18	2.269e-53	5.187e-52
AO090102000639	4	2802025	2805374	3349	16989.6	-1.65	0.12	5.386e-47	1.278e-45		AO090010000745	8	1455370	1457664	2294	1427.36	-6.6	0.44	2.5e-53	5.705e-52
AO090005001411	1	2689450	2690712	1262	450.32	-1.74	0.12	5.951e-47	1.409e-45		AO090003000979	2	4753263	4755066	1803	4674.36	3.44	0.23	2.529e-53	5.758e-52
AO090023000862	3	2250973	2252258	1285	4106.26	-1.24	0.09	7.761e-47	1.834e-45		AO090010000475	8	2118368	2119363	995	13771.3	2.15	0.14	2.546e-53	5.786e-52
AO090026000613	3	3419845	3422529	2684	19873.8	2.08	0.15	7.938e-47	1.871e-45		AO090701000468	5	1119324	1119924	600	236.64	-3.21	0.21	2.629e-53	5.962e-52
AO090003000250	2	2755413	2756292	879	643.86	2.9	0.2	8.799e-47	2.07e-45		AO090003001016	2	4840255	4843027	2772	474.67	-3.05	0.2	2.689e-53	6.085e-52
AO090120000006	5	2705448	2706246	798	800.89	1.72	0.12	9.55e-47	2.242e-45		AO090012000793	4	2039460	2040501	1041	2836.75	-2.86	0.19	2.851e-53	6.438e-52
AO090001000559	2	1464145	1465163	1018	1423.37	1.21	0.09	1.131e-46	2.651e-45		AO090010000751	8	1440217	1442018	1801	298.57	-6.3	0.42	3.383e-53	7.624e-52
AO090038000057	6	3518469	3520127	1658	561.16	-1.49	0.1	1.319e-46	3.085e-45		AO090001000454	2	1158936	1160247	1311	2243.89	2.77	0.18	3.827e-53	8.607e-52
AO090005001317	1	2897220	2898834	1614	754.97	-1.74	0.12	1.484e-46	3.463e-45		AO090011000101	7	288915	291007	2092	466.18	-2.49	0.16	4.072e-53	9.121e-52
AO090011000607	7	1546398	1547376	978	1571.55	1.33	0.09	1.504e-46	3.503e-45		AO090011000300	7	758270	759664	1394	8699.15	-4.81	0.32	4.067e-53	9.121e-52
AO090009000360	1	962320	965368	3048	2377.77	1.26	0.09	1.518e-46	3.528e-45		AO090011000414	7	1055929	1057050	1121	142632	5.19	0.34	4.964e-53	1.11e-51
AO090102000539	4	3061004	3062483	1479	6354.52	2.31	0.16	1.734e-46	4.022e-45		AO090023000641	3	1680885	1683038	2153	2523.9	2.44	0.16	6.852e-53	1.529e-51
AO090011000197	7	507062	508115	1053	191.52	-3.44	0.24	1.844e-46	4.269e-45		AO090003000908	2	4554350	4555646	1296	2971.5	-5.28	0.35	9.116e-53	2.03e-51
AO090120000182	5	3141692	3143984	2292	1350.18	-2.42	0.17	2.068e-46	4.779e-45		AO090001000498	2	1281492	1281985	493	4896.34	1.94	0.13	1.057e-52	2.348e-51
AO090026000246	3	4425766	4428187	2421	334.34	2.15	0.15	2.181e-46	5.03e-45		AO090026000264	3	4361047	4361962	915	1480.44	1.95	0.13	1.158e-52	2.569e-51
AO090005000588	1	4890609	4892360	1751	26990.9	1.97	0.14	2.722e-46	6.264e-45		AO090026000279	3	4324590	4325671	1081	671.6	-2.77	0.18	1.183e-52	2.618e-51
AO090120000214	5	3224910	3225727	817	610.6	-2.36	0.17	2.821e-46	6.478e-45		AO090003000855	2	4417550	4420419	2869	1731.93	2.04	0.13	1.315e-52	2.906e-51
AO090011000766	7	1954072	1957071	2999	851.67	1.74	0.12	2.944e-46	6.749e-45		AO090023000500	3	1306203	1307211	1008	14400.8	-1.8	0.12	1.372e-52	3.025e-51
AO090009000711	1	1896522	1897674	1152	13151.1	1	0.07	3.079e-46	7.045e-45		AO090012000323	4	796608	797241	633	625.74	-4.99	0.33	1.4e-52	3.08e-51
AO090010000461	8	2159511	2160288	777	408.97	2.24	0.16	3.149e-46	7.19e-45		AO090012000656	4	1672054	1672740	686	783.55	-4.09	0.27	1.576e-52	3.462e-51
AO090009000145	1	390656	394219	3563	983.03	-1.3	0.09	3.53e-46	8.045e-45		AO090005000042	1	6324100	6324892	792	1247.73	-6.53	0.43	1.728e-52	3.779e-51
AO090120000145	5	3039209	3040211	1002	2637.19	1.42	0.1	3.653e-46	8.308e-45		AO090026000141	3	4723401	4725125	1724	5616.73	3.03	0.2	1.726e-52	3.779e-51
AO090003000390	2	3131269	3132178	909	797.24	2.41	0.17	4.287e-46	9.73e-45		AO090023000358	3	915537	917375	1838	593.75	-6.79	0.45	1.858e-52	4.057e-51
AO090001000484	2	1222574	1225064	2490	6988.34	1.9	0.13	4.543e-46	1.029e-44		AO090003000241	2	2733174	2734189	1015	6170.54	2.68	0.18	2.502e-52	5.452e-51
AO090103000008	8	1255998	1257434	1436	5944.2	1.3	0.09	5.424e-46	1.224e-44		AO090701000178	5	1866476	1866950	474	252.82	-5.07	0.34	2.853e-52	6.203e-51
AO090026000526	3	3641592	3643133	1541	953.14	-1.77	0.13	5.485e-46	1.235e-44		AO090011000870	7	2223308	2225253	1945	10320.6	-4.68	0.31	2.939e-52	6.378e-51
AO090026000141	3	4723401	4725125	1724	11735.7	2.12	0.15	5.637e-46	1.267e-44		AO090005000828	1	4201334	4203068	1734	1051.69	7.23	0.48	3.55e-52	7.688e-51
AO090701000602	5	768214	769613	1399	6622.71	-2.16	0.15	6.934e-46	1.556e-44		AO090009000472	1	1243383	1244643	1260	3634.63	1.71	0.11	3.756e-52	8.12e-51
AO090005001159	1	3339887	3344115	4228	621.92	-2.35	0.17	7.655e-46	1.714e-44		AO090701000026	5	2282355	2283573	1218	5280.41	1.63	0.11	4.02e-52	8.674e-51
AO090038000629	6	1950014	1951045	1031	294.33	-2.14	0.15	8.75e-46	1.955e-44		AO090701000042	5	2242824	2245541	2717	1017.2	-2.62	0.17	4.034e-52	8.687e-51
AO090701000220	5	1756777	1758672	1895	8580.23	-1.41	0.1	8.797e-46	1.962e-44		AO090009000628	1	1673706	1675731	2025	5855.12	-4.26	0.28	9.462e-52	2.033e-50
AO090003000611	2	3734901	3736510	1609	9957.78	-1.57	0.11	9.777e-46	2.176e-44		AO090011000717	7	1834394	1835484	1090	3409.24	2.09	0.14	1.039e-51	2.229e-50
AO090138000060	6	4071513	4072193	680	396.02	2.29	0.16	1.05e-45	2.333e-44		AO090011000509	7	1274484	1277064	2580	829.07	2.34	0.16	1.173e-51	2.512e-50
AO090005000796	1	4289523	4292598	3075	6894.41	1.64	0.12	1.267e-45	2.809e-44		AO090010000563	8	1904165	1904978	813	1598.29	-3.31	0.22	1.326e-51	2.833e-50
AO090103000283	8	541772	543836	2064	1218.67	-1.57	0.11	1.34e-45	2.966e-44		AO090003001322	2	5676231	5677630	1399	249047	3.15	0.21	1.496e-51	3.191e-50
AO090005000216	1	5865825	5866545	720	505.55	2.7	0.19	1.416e-45	3.128e-44		AO090001000606	2	1586107	1586588	481	526.2	-6.3	0.42	1.839e-51	3.914e-50
AO090001000177	2	399567	400542	975	2447.58	1.75	0.12	1.435e-45	3.163e-44		AO090005000742	1	4443502	4445168	1666	2091.52	-4.75	0.32	1.986e-51	4.219e-50
AO090009000285	1	752561	753712	1151	1109.36	-1.56	0.11	1.637e-45	3.602e-44		AO090003000416	2	3192510	3193665	1155	1999.16	-1.69	0.11	2.054e-51	4.355e-50
AO090003000996	2	4797812	4799495	1683	4637.86	1.55	0.11	1.938e-45	4.257e-44		AO090020000042	6	1701972	1703056	1084	3638.7	-2.29	0.15	2.081e-51	4.403e-50
AO090012000593	4	1506388	1506838	450	1162.17	1.84	0.13	2.184e-45	4.788e-44		AO090026000640	3	3354454	3355311	857	1378.63	-3.05	0.2	2.28e-51	4.815e-50
AO090003001184	2	5316696	5318040	1344	918.91	2.27	0.16	2.34e-45	5.12e-44		AO090005000888	1	4049968	4051275	1307	16273.2	2.4	0.16	2.719e-51	5.732e-50
AO090020000209	6	1297395	1298937	1542	1890.16	-1.41	0.1	2.8e-45	6.115e-44		AO090001000325	2	827985	829066	1081	1658.43	-2.03	0.14	3.052e-51	6.422e-50
AO090012000998	4	2585926	2587307	1381	33861.8	2.7	0.19	3.163e-45	6.896e-44		AO090005001509	1	2423672	2424644	972	25857.9	1.76	0.12	3.195e-51	6.711e-50
AO090001000151	2	337630	338779	1149	155.16	-2.76	0.2	3.241e-45	7.051e-44		AO090005000446	1	5265059	5267163	2104	8342.75	-4.96	0.33	4.431e-51	9.288e-50
AO090012000054	4	125035	127895	2860	1675.86	-1.05	0.07	3.32e-45	7.21e-44		AO090010000532	8	1971779	1972487	708	1032.05	-3.72	0.25	4.522e-51	9.461e-50
AO090012000119	4	292256	293167	911	4768.19	-1.18	0.08	3.557e-45	7.711e-44		AO090011000610	7	1566405	1568218	1813	5260.43	-1.69	0.11	4.552e-51	9.506e-50
AO090010000444	8	2197556	2200018	2462	28318.2	3.16	0.23	3.758e-45	8.132e-44		AO090009000068	1	193648	195604	1956	832.2	-2.41	0.16	6.412e-51	1.337e-49
AO090001000555	2	1452923	1454299	1376	1410.77	-1.45	0.1	3.768e-45	8.138e-44		AO090001000285	2	711105	713417	2312	979.26	-6.64	0.45	7.221e-51	1.502e-49
AO090701000273	5	1621931	1623768	1837	5227.61	2.5	0.18	4.035e-45	8.698e-44		AO090012000044	4	93633	94746	1113	1245.08	-4.2	0.28	7.759e-51	1.611e-49
AO090138000085	6	4021666	4022734	1068	274.33	-2.15	0.15	4.737e-45	1.019e-43		AO090012000434	4	1085107	1086329	1222	5907.43	2.18	0.15	8.035e-51	1.665e-49
AO090003000324	2	2976177	2976837	660	1619.73	1.1	0.08	4.857e-45	1.043e-43		AO090005000135	1	6079830	6081083	1253	2164.3	3.17	0.21	8.154e-51	1.687e-49
AO090102000024	4	4485159	4485947	788	424.48	-2.24	0.16	5.142e-45	1.102e-43		AO090001000418	2	1056617	1058071	1454	432.71	2.63	0.18	9.871e-51	2.038e-49
AO090012000208	4	522399	523438	1039	4201.35	2.03	0.15	5.837e-45	1.249e-43		AO090011000396	7	1015034	1016150	1116	420.98	-2.56	0.17	1.113e-50	2.293e-49
AO090011000054	7	172062	173574	1512	171.4	-2.96	0.21	6.537e-45	1.396e-43		AO090701000069	5	2164456	2164873	417	1163.76	2.19	0.15	1.229e-50	2.528e-49
AO090038000626	6	1959606	1962995	3389	8306.9	-2.36	0.17	7.607e-45	1.622e-43		AO090009000551	1	1449468	1452382	2914	547.3	-3.32	0.22	1.253e-50	2.572e-49
AO090012000111	4	275453	276886	1433	181.29	-2.73	0.2	8.525e-45	1.814e-43		AO090009000388	1	1038443	1039352	909	1444.11	-3.08	0.21	1.602e-50	3.283e-49
AO090026000056	3	4976921	4978419	1498	516.92	-1.69	0.12	8.804e-45	1.87e-43		AO090120000224	5	3260457	3262358	1901	8255.91	2.88	0.2	1.629e-50	3.334e-49
AO090026000487	3	3747188	3748389	1201	5805.96	2.05	0.15	9.029e-45	1.914e-43		AO090003000354	2	3046012	3047591	1579	60399.3	-4.64	0.31	1.663e-50	3.395e-49
AO090102000410	4	3404389	3406567	2178	248.53	-2.89	0.21	9.178e-45	1.942e-43		AO090023000600	3	1582499	1583453	954	1745.33	-2.58	0.17	1.795e-50	3.659e-49
AO090120000387	5	3704899	3706141	1242	939.8	1.69	0.12	9.311e-45	1.967e-43		AO090012000033	4	69146	70558	1412	1077.52	-5.49	0.37	2.623e-50	5.338e-49
AO090001000549	2	1431881	1433768	1887	1529.78	-1.57	0.11	1.031e-44	2.173e-43		AO090005000313	1	5612118	5613597	1479	286.31	4.41	0.3	2.659e-50	5.4e-49
AO090003000779	2	4191134	4191565	431	586.06	2.33	0.17	1.034e-44	2.177e-43		AO090001000528	2	1380092	1384033	3941	487.79	-3.05	0.21	3.143e-50	6.372e-49
AO090011000118	7	333522	334029	507	168.4	-3.3	0.24	1.425e-44	2.994e-43		AO090011000275	7	706504	707971	1467	220.2	5.34	0.36	3.647e-50	7.379e-49
AO090005000977	1	3816856	3818584	1728	2807.46	1.37	0.1	1.925e-44	4.021e-43		AO090023000532	3	1412750	1415597	2847	340.05	2.99	0.2	4.478e-50	9.045e-49
AO090010000085	8	3185619	3188404	2785	237.76	2.55	0.18	1.924e-44	4.021e-43		AO090003000256	2	2774469	2775053	584	2264.01	-3.06	0.21	4.811e-50	9.7e-49
AO090003000980	2	4757841	4759676	1835	16968.9	2.29	0.17	1.935e-44	4.029e-43		AO090003000912	2	4564308	4565780	1472	751.32	2.96	0.2	4.876e-50	9.812e-49
AO090020000558	6	405771	406790	1019	4584.91	-2.45	0.18	1.932e-44	4.029e-43		AO090012000622	4	1590535	1590956	421	437.93	2.95	0.2	4.988e-50	1.002e-48
AO090003000624	2	3766104	3769024	2920	506.7	2.12	0.15	2.036e-44	4.232e-43		AO090012000334	4	818428	819116	688	9748.56	3.91	0.27	5.542e-50	1.111e-48
AO090701000225	5	1741451	1742471	1020	5913.56	1.02	0.07	2.305e-44	4.781e-43		AO090020000489	6	576757	577342	585	1804.44	2.31	0.16	5.655e-50	1.132e-48
AO090011000838	7	2132591	2139573	6982	29813.2	2.32	0.17	2.447e-44	5.067e-43		AO090003000424	2	3215486	3216998	1512	119.48	5.72	0.39	6.558e-50	1.31e-48
AO090012000768	4	1967507	1969089	1582	4286.53	1.75	0.13	2.847e-44	5.884e-43		AO090011000297	7	753875	754691	816	1050.31	-6.23	0.43	6.662e-50	1.329e-48
AO090701000226	5	1738879	1740999	2120	2651.1	1.16	0.08	3.071e-44	6.336e-43		AO090038000543	6	2181709	2193034	11325	809.62	-3.13	0.21	9.493e-50	1.89e-48
AO090010000517	8	2013757	2015098	1341	1648.19	1.25	0.09	3.209e-44	6.609e-43		AO090005001631	1	2070577	2071469	892	915.32	2.2	0.15	1.156e-49	2.298e-48
AO090701000069	5	2164456	2164873	417	1637.64	1.9	0.14	3.277e-44	6.738e-43		AO090012000625	4	1600135	1600478	343	6786.16	14.09	0.99	1.195e-49	2.371e-48
AO090005001143	1	3385666	3386315	649	1054.02	2.55	0.18	3.49e-44	7.164e-43		AO090005001072	1	3580138	3582493	2355	1391.21	2.23	0.15	1.374e-49	2.721e-48
AO090020000179	6	1376707	1377247	540	1352.7	-1.85	0.13	3.784e-44	7.754e-43		AO090001000475	2	1206736	1207327	591	971.19	-3.24	0.22	1.543e-49	3.051e-48
AO090012000853	4	2198484	2199972	1488	12583.8	-1.03	0.07	3.794e-44	7.759e-43		AO090166000077	4	4775113	4777699	2586	402.16	5.03	0.34	1.654e-49	3.264e-48
AO090102000570	4	2982074	2983221	1147	671.98	1.53	0.11	4.003e-44	8.173e-43		AO090701000127	5	2001444	2001814	370	1494.86	2.24	0.15	1.977e-49	3.894e-48
AO090012000233	4	575296	575716	420	1285.14	-2.92	0.21	4.267e-44	8.696e-43		AO090020000438	6	702139	703010	871	3920.67	-4.69	0.32	2.089e-49	4.107e-48
AO090120000324	5	3552323	3553795	1472	2220.67	1.07	0.08	5.62e-44	1.143e-42		AO090003000580	2	3643080	3644841	1761	378.72	-5.48	0.38	2.427e-49	4.764e-48
AO090120000052	5	2797912	2801326	3414	2175.14	-2.14	0.16	5.904e-44	1.199e-42		AO090020000493	6	566387	568008	1621	7983.16	-2.33	0.16	3.175e-49	6.22e-48
AO090001000560	2	1465645	1467483	1838	1968.75	1.16	0.08	5.953e-44	1.207e-42		AO090001000675	2	1777626	1778875	1249	3860.16	2.53	0.17	4.166e-49	8.148e-48
AO090113000134	5	4364760	4365536	776	143.23	3.17	0.23	6.039e-44	1.222e-42		AO090701000449	5	1162731	1164498	1767	723.1	-5.34	0.37	4.304e-49	8.403e-48
AO090003000548	2	3552362	3553172	810	652.65	1.26	0.09	7.19e-44	1.453e-42		AO090012000389	4	954749	957837	3088	1418.75	-3.88	0.27	5.553e-49	1.082e-47
AO090003000220	2	2672987	2674484	1497	340.64	-1.86	0.14	7.647e-44	1.542e-42		AO090001000615	2	1611644	1613466	1822	654.38	2.1	0.14	5.748e-49	1.118e-47
AO090012000511	4	1302024	1305927	3903	4272.43	1.72	0.13	8.531e-44	1.717e-42		AO090009000188	1	504154	505173	1019	2084.49	1.63	0.11	6.45e-49	1.253e-47
AO090120000439	5	3857558	3859728	2170	3703.46	1.21	0.09	8.687e-44	1.746e-42		AO090001000087	2	196301	198194	1893	613.41	-5.94	0.41	6.725e-49	1.304e-47
AO090005000773	1	4355869	4357339	1470	1228.6	-1.85	0.13	1.1e-43	2.206e-42		AO090003001431	2	5947616	5949051	1435	772.86	-4.22	0.29	8.214e-49	1.59e-47
AO090001000551	2	1438715	1442873	4158	3500.07	-1.13	0.08	1.117e-43	2.238e-42		AO090011000119	7	338251	339073	822	200769	-6.16	0.43	1.02e-48	1.971e-47
AO090701000293	5	1569507	1572798	3291	582.36	2.51	0.18	1.32e-43	2.635e-42		AO090011000768	7	1958435	1959908	1473	989.9	2.29	0.16	1.092e-48	2.107e-47
AO090003000246	2	2743915	2745459	1544	968.01	-1.57	0.11	1.439e-43	2.866e-42		AO090020000499	6	552760	554986	2226	663.33	-3.12	0.22	1.156e-48	2.225e-47
AO090011000204	7	529787	531828	2041	1919.9	1.25	0.09	1.522e-43	3.028e-42		AO090701000082	5	2138431	2139139	708	655.47	2.56	0.18	1.687e-48	3.242e-47
AO090103000084	8	1045032	1045501	469	293.48	-2.24	0.16	1.552e-43	3.081e-42		AO090003001308	2	5638143	5639931	1788	476.92	-5.7	0.4	2.212e-48	4.244e-47
AO090026000590	3	3472640	3477210	4570	3990.05	-1	0.07	1.574e-43	3.121e-42		AO090012000673	4	1710829	1712196	1367	967.31	2.78	0.19	2.69e-48	5.151e-47
AO090020000459	6	649035	651767	2732	702.86	3.63	0.27	1.665e-43	3.295e-42		AO090003000582	2	3647193	3647906	713	2132.51	1.59	0.11	2.724e-48	5.207e-47
AO090012000610	4	1554753	1558430	3677	6133.58	1.79	0.13	1.682e-43	3.323e-42		AO090005000886	1	4056449	4058903	2454	4926.14	3.13	0.22	2.81e-48	5.364e-47
AO090011000839	7	2140460	2144265	3805	4506.15	-1.29	0.09	1.959e-43	3.864e-42		AO090003001508	2	6133255	6134958	1703	3288.77	-2.03	0.14	3.72e-48	7.087e-47
AO090005000303	1	5639843	5640338	495	654	1.85	0.14	3.466e-43	6.824e-42		AO090011000613	7	1571207	1572219	1012	479.45	-4.12	0.29	4.003e-48	7.613e-47
AO090012000481	4	1194278	1195496	1218	92.9	4.85	0.36	4.804e-43	9.426e-42		AO090003001141	2	5217640	5218279	639	2780.35	1.9	0.13	4.026e-48	7.644e-47
AO090005001183	1	3291750	3293338	1588	2951.72	-2.75	0.2	5.294e-43	1.037e-41		AO090009000298	1	794135	795055	920	4722.89	-3.79	0.26	4.661e-48	8.834e-47
AO090120000350	5	3623775	3626392	2617	5338.3	2.13	0.16	5.305e-43	1.037e-41		AO090026000284	3	4312188	4314513	2325	3528.22	2.8	0.2	5.356e-48	1.013e-46
AO090009000637	1	1699448	1701480	2032	1860.05	1.94	0.14	5.772e-43	1.127e-41		AO090005000409	1	5378305	5379674	1369	35333.9	1.88	0.13	6.117e-48	1.156e-46
AO090003000807	2	4246656	4249334	2678	3851.35	1.04	0.08	5.838e-43	1.138e-41		AO090701000540	5	923727	924637	910	214.75	-5.07	0.35	6.139e-48	1.158e-46
AO090026000805	3	2939757	2941140	1383	460.42	-2.33	0.17	7.554e-43	1.47e-41		AO090003001204	2	5368637	5369948	1311	4490.1	-3.19	0.22	7.868e-48	1.481e-46
AO090005000158	1	6009138	6010271	1133	1158.92	-1.53	0.11	8.819e-43	1.713e-41		AO090010000705	8	1558906	1559820	914	1010.87	4.86	0.34	9.241e-48	1.737e-46
AO090103000026	8	1200297	1202542	2245	1633.05	-2.61	0.19	9.166e-43	1.777e-41		AO090005000200	1	5903070	5904240	1170	250.41	-4.39	0.31	1.056e-47	1.981e-46
AO090023000700	3	1848064	1850182	2118	608.73	2.45	0.18	9.453e-43	1.83e-41		AO090005001450	1	2598609	2599598	989	5339.61	2.31	0.16	1.08e-47	2.023e-46
AO090005001203	1	3242014	3244640	2626	2939.38	1.11	0.08	1.48e-42	2.86e-41		AO090012000440	4	1098150	1101730	3580	276.33	-3.38	0.24	1.11e-47	2.075e-46
AO090701000359	5	1385153	1386797	1644	48101.6	2.27	0.17	1.585e-42	3.059e-41		AO090102000441	4	3338329	3341421	3092	762.54	-4.14	0.29	1.111e-47	2.075e-46
AO090005000091	1	6198939	6200560	1621	5093.83	1.25	0.09	1.68e-42	3.235e-41		AO090009000310	1	828300	828927	627	1099.41	2.01	0.14	1.241e-47	2.314e-46
AO090001000241	2	589573	590911	1338	2328.02	-1.4	0.1	1.732e-42	3.331e-41		AO090023000697	3	1842459	1844102	1643	18951.3	-2.38	0.17	1.362e-47	2.534e-46
AO090012000235	4	578206	579384	1178	152.7	-3.25	0.24	1.81e-42	3.475e-41		AO090005000781	1	4337994	4339184	1190	1238.06	2.03	0.14	1.414e-47	2.626e-46
AO090010000612	8	1787804	1788572	768	1069.34	-3.04	0.23	1.852e-42	3.549e-41		AO090103000339	8	406630	407329	699	4582.48	3.35	0.23	1.541e-47	2.858e-46
AO090038000026	6	3595709	3597160	1451	381.07	-1.7	0.13	1.981e-42	3.791e-41		AO090023000483	3	1238035	1244821	6786	5887.42	3.26	0.23	1.584e-47	2.932e-46
AO090011000654	7	1698088	1699624	1536	3109.39	-2.86	0.21	2.606e-42	4.978e-41		AO090012000359	4	885577	886539	962	294.03	-4.23	0.3	1.667e-47	3.08e-46
AO090026000009	3	5092129	5098753	6624	2028.28	-1.38	0.1	2.88e-42	5.492e-41		AO090023000781	3	2029881	2034078	4197	2683.99	1.86	0.13	1.924e-47	3.55e-46
AO090012000304	4	756961	759910	2949	787.59	1.88	0.14	3.429e-42	6.529e-41		AO090003000805	2	4242026	4243091	1065	34247.1	3.19	0.22	2.089e-47	3.849e-46
AO090026000740	3	3095413	3096310	897	208.85	-3.26	0.24	3.967e-42	7.54e-41		AO090012000197	4	483634	489237	5603	2440.66	1.94	0.14	2.6e-47	4.781e-46
AO090009000696	1	1860567	1862769	2202	4905.47	-1.79	0.13	5.151e-42	9.775e-41		AO090012000704	4	1785548	1788679	3131	266.85	-3.42	0.24	2.813e-47	5.164e-46
AO090701000839	5	162132	165191	3059	9991.04	-2.09	0.16	5.885e-42	1.115e-40		AO090005000086	1	6205403	6206688	1285	3943.81	2.29	0.16	2.828e-47	5.184e-46
AO090005001569	1	2227830	2229772	1942	1557.21	1	0.07	5.964e-42	1.128e-40		AO090001000508	2	1306015	1307465	1450	186.01	5.52	0.39	3.461e-47	6.333e-46
AO090010000026	8	3338837	3339668	831	726.93	-2.01	0.15	7.093e-42	1.339e-40		AO090010000101	8	3156643	3158679	2036	1074.35	-5.37	0.38	3.618e-47	6.609e-46
AO090023000990	3	2615604	2618870	3266	2723.47	-1.02	0.08	7.323e-42	1.381e-40		AO090005001077	1	3572382	3573214	832	8197.82	2.16	0.15	3.86e-47	7.041e-46
AO090026000553	3	3567519	3571389	3870	3735.23	-1.29	0.1	7.665e-42	1.443e-40		AO090120000372	5	3663311	3664403	1092	1667.35	-4.4	0.31	4.334e-47	7.892e-46
AO090701000840	5	159733	160697	964	5762.5	-1.93	0.14	8.038e-42	1.511e-40		AO090026000298	3	4271431	4272027	596	1023.88	3.53	0.25	4.705e-47	8.553e-46
AO090003001232	2	5447352	5449826	2474	5740.34	1.19	0.09	8.321e-42	1.561e-40		AO090102000361	4	3546840	3549185	2345	16354.7	-2.17	0.15	5.387e-47	9.777e-46
AO090011000045	7	149758	151615	1857	408.56	-1.84	0.14	9.901e-42	1.855e-40		AO090038000180	6	3212632	3214483	1851	1533.98	-6.77	0.48	6.083e-47	1.102e-45
AO090012000212	4	532710	533802	1092	1085.3	1.91	0.14	1.058e-41	1.978e-40		AO090012000641	4	1633115	1634327	1212	2267.8	1.93	0.14	7.064e-47	1.278e-45
AO090003000070	2	2280288	2281412	1124	5934.78	1.26	0.09	1.1e-41	2.054e-40		AO090023000996	3	2634279	2635902	1623	1995.65	2.18	0.15	7.353e-47	1.328e-45
AO090701000432	5	1203704	1204321	617	186.31	2.43	0.18	1.142e-41	2.129e-40		AO090009000018	1	62127	64279	2152	187.58	-4.22	0.3	7.988e-47	1.44e-45
AO090003000847	2	4398827	4399529	702	9968.22	3.11	0.23	1.22e-41	2.27e-40		AO090001000293	2	726482	734003	7521	6255.11	-2.94	0.21	9.221e-47	1.66e-45
AO090012000977	4	2533755	2534558	803	4352.11	2.85	0.21	1.247e-41	2.318e-40		AO090009000411	1	1084489	1085115	626	713.65	-4.17	0.29	9.817e-47	1.764e-45
AO090011000640	7	1652300	1652731	431	767.42	-1.7	0.13	1.341e-41	2.487e-40		AO090138000135	6	3873393	3874820	1427	1690.03	-2.1	0.15	1.035e-46	1.857e-45
AO090124000085	5	2464928	2467260	2332	6202.73	1	0.07	1.375e-41	2.547e-40		AO090009000123	1	332658	334589	1931	438.29	6.5	0.46	1.04e-46	1.862e-45
AO090138000043	6	4103908	4104361	453	2823.27	1.49	0.11	1.387e-41	2.564e-40		AO090005001124	1	3433559	3435188	1629	3655.05	1.67	0.12	1.254e-46	2.242e-45
AO090005000302	1	5640399	5641372	973	1206.27	1.98	0.15	1.577e-41	2.911e-40		AO090005001272	1	3049906	3050390	484	1137.41	1.97	0.14	1.297e-46	2.316e-45
AO090010000155	8	2997911	2999451	1540	159	3.05	0.23	1.938e-41	3.572e-40		AO090003000839	2	4357394	4359605	2211	2369.93	1.85	0.13	1.314e-46	2.343e-45
AO090120000499	5	4018184	4018792	608	1406.4	2.22	0.17	2.018e-41	3.714e-40		AO090020000053	6	1675665	1676790	1125	1211.31	2.71	0.19	2.038e-46	3.628e-45
AO090010000707	8	1553853	1554618	765	182.81	3.36	0.25	2.304e-41	4.233e-40		AO090005000909	1	3990195	3992690	2495	1508.85	-6.65	0.47	2.057e-46	3.655e-45
AO090103000030	8	1183618	1185478	1860	2000.11	2.13	0.16	2.549e-41	4.677e-40		AO090023000397	3	1018004	1021364	3360	885.65	-6.87	0.49	2.204e-46	3.91e-45
AO090003000900	2	4532570	4533231	661	1150.44	1.13	0.09	2.569e-41	4.706e-40		AO090103000420	8	201884	205870	3986	902.27	-3.59	0.25	2.809e-46	4.975e-45
AO090010000490	8	2076587	2077483	896	389.22	-1.62	0.12	2.794e-41	5.11e-40		AO090038000224	6	3070619	3072633	2014	6661.22	2.25	0.16	2.861e-46	5.06e-45
AO090102000166	4	4108474	4115764	7290	2869.27	2.45	0.18	3.547e-41	6.466e-40		AO090020000685	6	86415	87761	1346	127.96	4.86	0.34	2.93e-46	5.174e-45
AO090102000111	4	4248306	4249266	960	3771.27	-1.02	0.08	3.804e-41	6.924e-40		AO090020000546	6	424852	425281	429	202.68	-3.62	0.26	2.975e-46	5.246e-45
AO090003000316	2	2950014	2952786	2772	5064.8	2.05	0.15	4.869e-41	8.848e-40		AO090003000460	2	3319299	3321103	1804	2263.6	-4.08	0.29	3.162e-46	5.566e-45
AO090026000411	3	3959227	3961171	1944	69.69	3.68	0.28	5.762e-41	1.046e-39		AO090038000108	6	3392481	3393699	1218	17437.2	-5.55	0.39	3.615e-46	6.353e-45
AO090102000514	4	3127614	3128788	1174	587.64	-2.96	0.22	5.84e-41	1.058e-39		AO090011000650	7	1689893	1691174	1281	15287.7	-2.55	0.18	3.666e-46	6.433e-45
AO090102000650	4	2768811	2769723	912	2444.77	-1.67	0.13	6.125e-41	1.108e-39		AO090038000629	6	1950014	1951045	1031	1034.51	-3.2	0.23	4.216e-46	7.386e-45
AO090001000663	2	1743749	1747931	4182	6853.1	1.11	0.08	6.269e-41	1.132e-39		AO090010000660	8	1669304	1671555	2251	377.47	-2.28	0.16	4.869e-46	8.517e-45
AO090009000211	1	566449	568389	1940	8754.02	-2.15	0.16	8.409e-41	1.516e-39		AO090010000704	8	1562114	1562841	727	427.09	-5.78	0.41	4.879e-46	8.52e-45
AO090023000909	3	2382527	2385104	2577	5562.56	1.52	0.12	8.548e-41	1.539e-39		AO090005000616	1	4819500	4820758	1258	1689.01	2.45	0.17	5.309e-46	9.256e-45
AO090020000285	6	1109916	1110786	870	1211.86	1.51	0.11	1.059e-40	1.903e-39		AO090026000084	3	4894384	4895224	840	632.31	5.14	0.37	5.692e-46	9.909e-45
AO090103000128	8	927235	929356	2121	142.28	3.9	0.3	1.204e-40	2.162e-39		AO090026000252	3	4408510	4409964	1454	1654.64	-2.63	0.19	6.193e-46	1.076e-44
AO090038000248	6	3012042	3013305	1263	1197.21	1.13	0.09	1.308e-40	2.344e-39		AO090012000549	4	1397413	1398583	1170	1127.57	2.03	0.14	6.259e-46	1.086e-44
AO090166000075	4	4771448	4772705	1257	227.9	-3.23	0.25	1.425e-40	2.55e-39		AO090001000463	2	1177365	1178493	1128	2594.27	-4.56	0.32	6.553e-46	1.135e-44
AO090003000465	2	3336935	3338526	1591	289.3	2.44	0.19	1.461e-40	2.61e-39		AO090005000439	1	5284180	5287154	2974	8322.03	-3.48	0.25	6.565e-46	1.136e-44
AO090001000486	2	1228958	1230163	1205	2721.64	1.18	0.09	1.804e-40	3.218e-39		AO090003001255	2	5505612	5506316	704	3338.47	2.14	0.15	7.341e-46	1.268e-44
AO090005001302	1	2931666	2933258	1592	51600	1.26	0.1	1.859e-40	3.311e-39		AO090005001275	1	3042552	3043800	1248	597.52	2.17	0.15	7.506e-46	1.294e-44
AO090023000870	3	2272631	2274248	1617	3527.23	1.66	0.13	1.865e-40	3.316e-39		AO090005000321	1	5599296	5601366	2070	416.78	-7.12	0.51	7.545e-46	1.299e-44
AO090010000476	8	2116368	2117433	1065	1322.51	1.41	0.11	1.911e-40	3.393e-39		AO090011000215	7	558775	559742	967	20385.5	3.33	0.24	7.943e-46	1.366e-44
AO090011000066	7	200099	201653	1554	381.86	-2.81	0.21	2.264e-40	4.013e-39		AO090166000060	4	4717569	4720497	2928	4670.81	-2.75	0.2	8.409e-46	1.443e-44
AO090023000099	3	247704	249339	1635	18909.3	1.23	0.09	2.33e-40	4.125e-39		AO090001000507	2	1303884	1305224	1340	153.57	4.3	0.31	8.757e-46	1.501e-44
AO090023000625	3	1640663	1641268	605	480.64	2.4	0.18	2.361e-40	4.173e-39		AO090001000484	2	1222574	1225064	2490	5081.98	3.05	0.22	9.652e-46	1.652e-44
AO090005001295	1	2949731	2950845	1114	2666.24	-1.7	0.13	2.93e-40	5.171e-39		AO090005000833	1	4188541	4190217	1676	700.17	2.34	0.17	1.276e-45	2.18e-44
AO090102000052	4	4411927	4412752	825	443.66	-2.02	0.15	3.011e-40	5.305e-39		AO090003000357	2	3052342	3054848	2506	1202.6	-1.9	0.14	1.577e-45	2.69e-44
AO090026000083	3	4896326	4898755	2429	165.23	-4.31	0.33	3.249e-40	5.716e-39		AO090113000103	5	4295947	4300853	4906	4586.39	-4.55	0.33	1.986e-45	3.382e-44
AO090020000336	6	989376	989865	489	510.65	-1.89	0.14	3.447e-40	6.054e-39		AO090026000137	3	4732669	4733354	685	2027.67	-3.08	0.22	2.083e-45	3.543e-44
AO090012000571	4	1451772	1452689	917	1032.52	2	0.15	4.98e-40	8.721e-39		AO090003001440	2	5963354	5965290	1936	437.16	-4.88	0.35	2.092e-45	3.553e-44
AO090003000759	2	4134560	4135273	713	102.15	3.39	0.26	6.024e-40	1.053e-38		AO090138000169	6	3790683	3792123	1440	898.47	-2.69	0.19	2.474e-45	4.195e-44
AO090103000212	8	743459	744432	973	5438.56	-1.86	0.14	7.683e-40	1.341e-38		AO090023000425	3	1088259	1089965	1706	459.3	-7.13	0.52	2.811e-45	4.76e-44
AO090005001515	1	2405619	2406116	497	2965.45	-1.35	0.1	8.237e-40	1.436e-38		AO090124000083	5	2476608	2482302	5694	19060.2	1.74	0.12	2.921e-45	4.938e-44
AO090001000415	2	1051300	1052636	1336	21637.3	2.51	0.19	8.345e-40	1.453e-38		AO090009000395	1	1051442	1051897	455	25869.4	3.15	0.23	2.96e-45	4.997e-44
AO090020000458	6	657374	658309	935	1014.34	1.29	0.1	8.383e-40	1.457e-38		AO090005000903	1	4008029	4009164	1135	299.86	-4.5	0.32	3.204e-45	5.399e-44
AO090023000570	3	1503688	1504524	836	17848.6	2.31	0.18	8.906e-40	1.546e-38		AO090001000500	2	1283602	1285534	1932	2572.06	2.27	0.16	3.521e-45	5.925e-44
AO090701000206	5	1790572	1792253	1681	18956.3	-3.03	0.23	9.141e-40	1.584e-38		AO090026000530	3	3629549	3631403	1854	1400.84	-2.77	0.2	3.825e-45	6.427e-44
AO090005001244	1	3124625	3126639	2014	2643.05	1.98	0.15	9.179e-40	1.588e-38		AO090701000761	5	355060	356462	1402	2157.32	2.51	0.18	4.361e-45	7.316e-44
AO090005001044	1	3644866	3646019	1153	8864.17	-2.65	0.2	9.431e-40	1.629e-38		AO090012000293	4	726040	726749	709	2063.5	-1.92	0.14	4.494e-45	7.528e-44
AO090011000068	7	203318	205072	1754	578.62	-2.52	0.19	9.667e-40	1.668e-38		AO090003000709	2	4005037	4005814	777	562.98	-3.42	0.25	4.565e-45	7.635e-44
AO090011000931	7	2448955	2450095	1140	7204.03	1.34	0.1	9.704e-40	1.672e-38		AO090020000699	6	50951	51983	1032	1528.92	-4	0.29	5.961e-45	9.955e-44
AO090003000391	2	3132299	3132716	417	339.64	2.74	0.21	1.003e-39	1.725e-38		AO090023000674	3	1771694	1772500	806	1848.34	-3.88	0.28	6.311e-45	1.052e-43
AO090011000756	7	1933988	1934711	723	2708.34	1.04	0.08	1.062e-39	1.824e-38		AO090120000102	5	2935968	2938227	2259	2040.19	-6.16	0.44	6.513e-45	1.084e-43
AO090010000079	8	3204315	3204834	519	1717.47	3.01	0.23	1.279e-39	2.193e-38		AO090038000494	6	2344139	2345683	1544	1613.48	-2.22	0.16	7.175e-45	1.193e-43
AO090005000546	1	4992687	4993734	1047	1103.85	-1.7	0.13	1.3e-39	2.226e-38		AO090003001081	2	5027834	5029539	1705	4760.79	-3.23	0.23	9.037e-45	1.5e-43
AO090026000716	3	3164362	3166031	1669	1597.81	-1.39	0.11	1.49e-39	2.541e-38		AO090020000301	6	1072143	1074393	2250	1323	-2.77	0.2	1.029e-44	1.706e-43
AO090038000582	6	2080719	2082679	1960	6848.27	1.84	0.14	1.491e-39	2.541e-38		AO090020000404	6	812003	813228	1225	797.85	2.57	0.19	1.047e-44	1.733e-43
AO090010000462	8	2157886	2159242	1356	1605.84	1.86	0.14	1.56e-39	2.655e-38		AO090012000097	4	234268	237570	3302	7138.7	-6.2	0.45	1.34e-44	2.215e-43
AO090023000592	3	1567352	1568399	1047	5226.56	2.03	0.16	1.617e-39	2.749e-38		AO090011000156	7	422422	424448	2026	727.28	-3.13	0.23	1.444e-44	2.383e-43
AO090009000436	1	1140116	1141218	1102	957.71	1.32	0.1	1.628e-39	2.764e-38		AO090012000034	4	71301	72969	1668	2947.7	-6.01	0.44	1.505e-44	2.48e-43
AO090023000811	3	2111397	2112660	1263	7442.61	-1.2	0.09	1.689e-39	2.863e-38		AO090023000800	3	2075404	2077240	1836	1156	-2.25	0.16	2.537e-44	4.174e-43
AO090701000193	5	1820331	1821984	1653	7377.4	1.59	0.12	1.778e-39	3.008e-38		AO090023000384	3	987988	989228	1240	153.95	6.41	0.47	2.573e-44	4.227e-43
AO090011000720	7	1845218	1846824	1606	1359.9	1.44	0.11	1.945e-39	3.287e-38		AO090138000150	6	3839123	3840451	1328	570.43	-4.02	0.29	2.646e-44	4.34e-43
AO090138000024	6	4145418	4148850	3432	3458.12	2.93	0.23	1.997e-39	3.37e-38		AO090120000287	5	3418874	3421231	2357	25958.5	-2.7	0.2	2.751e-44	4.506e-43
AO090120000256	5	3350388	3351030	642	57725.6	2.25	0.17	2.02e-39	3.404e-38		AO090005001361	1	2793667	2794950	1283	7243.7	2.16	0.16	4.054e-44	6.63e-43
AO090010000089	8	3180297	3180850	553	872.68	-2.96	0.23	2.033e-39	3.421e-38		AO090701000101	5	2090631	2091597	966	8746.06	5.03	0.37	4.238e-44	6.92e-43
AO090003000791	2	4214557	4214960	403	813.15	1.19	0.09	2.067e-39	3.474e-38		AO090102000137	4	4186431	4189110	2679	1651.47	-2.6	0.19	4.665e-44	7.608e-43
AO090023000591	3	1564577	1565772	1195	1032.62	1.87	0.14	2.183e-39	3.662e-38		AO090003001444	2	5972838	5973648	810	1590.54	-3.51	0.26	4.964e-44	8.084e-43
AO090005000060	1	6274952	6276959	2007	263.64	-3.35	0.26	2.244e-39	3.759e-38		AO090009000071	1	201611	211057	9446	1044.16	-1.6	0.12	5.174e-44	8.412e-43
AO090023000461	3	1181756	1184245	2489	402.03	-1.53	0.12	2.344e-39	3.921e-38		AO090005000575	1	4933521	4934253	732	669.69	1.83	0.13	5.379e-44	8.733e-43
AO090003001320	2	5670011	5670476	465	1058.44	2.66	0.21	2.738e-39	4.567e-38		AO090001000539	2	1407714	1408257	543	1694.1	-3.13	0.23	5.456e-44	8.845e-43
AO090001000404	2	1011666	1013175	1509	532.36	-2.44	0.19	3.021e-39	5.031e-38		AO090026000110	3	4806735	4807329	594	310.9	-4.07	0.3	6.542e-44	1.059e-42
AO090102000483	4	3217559	3219762	2203	387.29	-2.42	0.19	3.316e-39	5.516e-38		AO090023000899	3	2353868	2355585	1717	2516.52	2.83	0.21	6.598e-44	1.067e-42
AO090102000102	4	4266299	4269443	3144	3405.96	1.14	0.09	3.623e-39	6.017e-38		AO090012000298	4	738035	740361	2326	1613.29	-1.72	0.12	7.512e-44	1.213e-42
AO090001000500	2	1283602	1285534	1932	3089.64	1.59	0.12	4.515e-39	7.487e-38		AO090012000800	4	2055996	2056869	873	945.64	4.52	0.33	8.277e-44	1.334e-42
AO090005001196	1	3263249	3264561	1312	1718.35	1.96	0.15	5.08e-39	8.413e-38		AO090701000581	5	812898	814532	1634	360.16	-2.76	0.2	8.751e-44	1.408e-42
AO090038000329	6	2796733	2797832	1099	79.17	4.78	0.38	5.828e-39	9.623e-38		AO090010000404	8	2287046	2293808	6762	788.35	-5.04	0.37	9.058e-44	1.456e-42
AO090001000136	2	304522	305617	1095	108.21	3.85	0.3	6.103e-39	1.006e-37		AO090026000053	3	4984379	4986166	1787	595.52	-6.37	0.47	1.132e-43	1.816e-42
AO090113000107	5	4307773	4308910	1137	215.15	-2.21	0.17	6.215e-39	1.023e-37		AO090701000315	5	1516107	1517289	1182	421.17	-7.39	0.55	1.406e-43	2.253e-42
AO090023000409	3	1047107	1048546	1439	213.48	-3.26	0.25	6.725e-39	1.106e-37		AO090120000182	5	3141692	3143984	2292	6287.07	-4.01	0.29	1.418e-43	2.27e-42
AO090038000281	6	2925321	2927010	1689	24950.7	2.78	0.22	7.587e-39	1.246e-37		AO090010000648	8	1699504	1700493	989	413.34	-3.46	0.25	1.684e-43	2.691e-42
AO090020000145	6	1446527	1448732	2205	2516.69	-1.56	0.12	7.933e-39	1.301e-37		AO090009000116	1	319628	321145	1517	281.84	-6.01	0.44	1.79e-43	2.855e-42
AO090003000453	2	3301613	3304925	3312	1356.3	-1.39	0.11	7.991e-39	1.308e-37		AO090102000632	4	2822332	2824156	1824	4858.08	2.18	0.16	1.815e-43	2.891e-42
AO090020000470	6	630841	631453	612	161.59	2.76	0.21	8.606e-39	1.407e-37		AO090003000825	2	4313997	4316154	2157	3136.5	-6.06	0.45	2.013e-43	3.203e-42
AO090005001000	1	3752018	3754997	2979	3666.12	-1.81	0.14	9.778e-39	1.594e-37		AO090026000843	3	2810960	2811692	732	2120.19	1.88	0.14	2.152e-43	3.42e-42
AO090009000101	1	285414	286608	1194	1161.92	-1.99	0.15	9.846e-39	1.603e-37		AO090102000089	4	4314014	4314890	876	528.7	-6.63	0.49	2.198e-43	3.487e-42
AO090026000057	3	4973404	4975744	2340	3554.16	-2.17	0.17	1.002e-38	1.629e-37		AO090102000573	4	2976720	2978178	1458	2977.67	2.22	0.16	2.256e-43	3.573e-42
AO090026000219	3	4500526	4502171	1645	318.83	-2.88	0.22	1.027e-38	1.667e-37		AO090026000641	3	3352911	3354160	1249	4208.47	-3.91	0.29	2.297e-43	3.634e-42
AO090011000425	7	1082410	1083379	969	3556.97	-2.34	0.18	1.071e-38	1.736e-37		AO090026000538	3	3606220	3606710	490	1725.89	1.57	0.11	2.705e-43	4.274e-42
AO090102000473	4	3243572	3244293	721	637.29	-1.84	0.14	1.128e-38	1.827e-37		AO090011000580	7	1469679	1470135	456	8403.47	1.59	0.12	3.378e-43	5.329e-42
AO090102000545	4	3037794	3044445	6651	939.37	-1.16	0.09	1.233e-38	1.993e-37		AO090003001497	2	6093477	6096064	2587	758.42	4.62	0.34	3.477e-43	5.477e-42
AO090701000577	5	824574	825528	954	7932.35	1.78	0.14	1.45e-38	2.337e-37		AO090038000193	6	3171090	3172236	1146	366.81	-2.41	0.18	3.497e-43	5.5e-42
AO090011000602	7	1532824	1534458	1634	1185.11	-1.46	0.11	1.456e-38	2.344e-37		AO090009000086	1	249087	250629	1542	208.2	-4.25	0.31	3.527e-43	5.54e-42
AO090001000594	2	1554080	1555209	1129	596.36	1.7	0.13	1.892e-38	3.042e-37		AO090102000604	4	2891645	2893091	1446	588.96	2.59	0.19	4.021e-43	6.308e-42
AO090020000024	6	1766484	1768110	1626	4145.53	1.43	0.11	2.189e-38	3.51e-37		AO090701000187	5	1845289	1847013	1724	867.21	1.74	0.13	4.029e-43	6.31e-42
AO090701000399	5	1290521	1291505	984	1165.99	-3.21	0.25	2.218e-38	3.551e-37		AO090023000667	3	1753570	1755130	1560	2659.71	2.32	0.17	5.042e-43	7.885e-42
AO090103000469	8	88776	90457	1681	218.63	-1.98	0.15	2.364e-38	3.78e-37		AO090701000541	5	917728	922647	4919	487.62	-2.59	0.19	5.866e-43	9.162e-42
AO090010000120	8	3087593	3088812	1219	888.74	1.56	0.12	2.477e-38	3.955e-37		AO090012000796	4	2044765	2046675	1910	4847.55	2.11	0.16	6.726e-43	1.049e-41
AO090012000097	4	234268	237570	3302	120.82	3.27	0.26	2.992e-38	4.77e-37		AO090102000295	4	3729706	3730412	706	645.14	2.06	0.15	6.787e-43	1.057e-41
AO090011000024	7	64681	66201	1520	140.72	-3.91	0.31	3.109e-38	4.95e-37		AO090023000870	3	2272631	2274248	1617	1612.41	1.91	0.14	6.797e-43	1.057e-41
AO090011000649	7	1685837	1687535	1698	12819.2	-2.1	0.16	3.184e-38	5.063e-37		AO090120000493	5	4010202	4011331	1129	17007.5	2.69	0.2	7.14e-43	1.109e-41
AO090120000264	5	3372470	3373548	1078	29753.4	1.77	0.14	3.307e-38	5.251e-37		AO090113000044	5	4149378	4150816	1438	195.19	-3.58	0.26	8.39e-43	1.301e-41
AO090166000060	4	4717569	4720497	2928	1558.36	-2.36	0.18	3.337e-38	5.291e-37		AO090020000492	6	568385	570234	1849	11017	-2.54	0.19	8.657e-43	1.341e-41
AO090001000166	2	376220	376808	588	882.29	2.81	0.22	3.919e-38	6.206e-37		AO090005000818	1	4229513	4230260	747	2643.68	-5.16	0.38	1.014e-42	1.568e-41
AO090005001365	1	2784643	2786539	1896	120.98	3.9	0.31	4.058e-38	6.417e-37		AO090009000014	1	50559	51939	1380	751.48	1.99	0.15	1.139e-42	1.759e-41
AO090003000576	2	3633641	3635090	1449	155.71	3.76	0.3	4.567e-38	7.212e-37		AO090023000632	3	1662137	1662795	658	2376.23	1.67	0.12	1.199e-42	1.848e-41
AO090005001230	1	3166942	3169138	2196	24502.5	1.75	0.14	4.759e-38	7.505e-37		AO090011000626	7	1613663	1614053	390	31113.2	3.27	0.24	1.536e-42	2.366e-41
AO090038000058	6	3517024	3518145	1121	452.03	-2.61	0.2	4.833e-38	7.611e-37		AO090003000828	2	4321124	4324399	3275	1592.36	1.8	0.13	1.705e-42	2.623e-41
AO090020000138	6	1467531	1468209	678	188.07	-2.2	0.17	4.986e-38	7.842e-37		AO090001000464	2	1178921	1180154	1233	2908.59	-5.22	0.39	1.894e-42	2.909e-41
AO090113000108	5	4309483	4310161	678	179.47	-2.38	0.19	5.035e-38	7.908e-37		AO090010000315	8	2501807	2502755	948	383.93	-2.61	0.19	1.962e-42	3.01e-41
AO090026000761	3	3050692	3052476	1784	472.21	-2.41	0.19	5.181e-38	8.116e-37		AO090023000133	3	339614	340259	645	2602.57	2.2	0.16	2.506e-42	3.839e-41
AO090026000498	3	3718897	3722748	3851	4719.04	1.29	0.1	5.314e-38	8.313e-37		AO090005001564	1	2241722	2243340	1618	4007.77	-2.7	0.2	2.548e-42	3.898e-41
AO090010000592	8	1833927	1835288	1361	402.01	-3.54	0.28	5.932e-38	9.267e-37		AO090701000046	5	2229104	2230385	1281	26256.5	-5.52	0.41	2.837e-42	4.334e-41
AO090124000050	5	2564443	2566787	2344	1456.68	-1.53	0.12	6.901e-38	1.077e-36		AO090011000558	7	1410715	1412803	2088	687.37	-3.52	0.26	3.197e-42	4.876e-41
AO090010000470	8	2136403	2138174	1771	461.29	2.58	0.2	7.798e-38	1.215e-36		AO090023000946	3	2501097	2503062	1965	1780.15	-3.29	0.25	3.513e-42	5.351e-41
AO090011000205	7	532193	533600	1407	260.37	2.68	0.21	9.159e-38	1.425e-36		AO090005000436	1	5292831	5294348	1517	15854.9	2.4	0.18	3.75e-42	5.704e-41
AO090011000747	7	1911699	1914721	3022	345.13	-3.7	0.29	9.195e-38	1.429e-36		AO090020000533	6	457557	458887	1330	527.29	4.31	0.32	4.083e-42	6.202e-41
AO090038000085	6	3456959	3457867	908	255.63	-1.79	0.14	9.313e-38	1.445e-36		AO090003000980	2	4757841	4759676	1835	8545.93	2.3	0.17	4.334e-42	6.574e-41
AO090011000436	7	1107293	1110120	2827	1259.33	-1.32	0.1	9.445e-38	1.464e-36		AO090701000543	5	912054	912782	728	25949.1	2.53	0.19	4.878e-42	7.39e-41
AO090005000114	1	6141605	6143522	1917	33279.7	-2.63	0.21	1.008e-37	1.561e-36		AO090701000325	5	1488050	1489849	1799	252.74	-4.55	0.34	5.64e-42	8.52e-41
AO090026000421	3	3934312	3935234	922	1454.64	1.06	0.08	1.033e-37	1.597e-36		AO090701000605	5	762129	763295	1166	713.07	-3.15	0.24	5.638e-42	8.52e-41
AO090005000420	1	5346773	5348409	1636	909.24	-2.59	0.2	1.253e-37	1.935e-36		AO090011000693	7	1785854	1787069	1215	267.23	-2.84	0.21	6.91e-42	1.043e-40
AO090010000098	8	3162203	3163294	1091	440.53	1.53	0.12	1.3e-37	2.004e-36		AO090020000602	6	298708	299958	1250	1514.93	1.95	0.15	7.382e-42	1.112e-40
AO090120000338	5	3584877	3585812	935	2470.8	1.2	0.09	1.323e-37	2.037e-36		AO090023000752	3	1967553	1969721	2168	1605.81	2.54	0.19	8.348e-42	1.256e-40
AO090020000667	6	134651	136446	1795	3494.08	1.27	0.1	1.333e-37	2.05e-36		AO090003001363	2	5786826	5787987	1161	546.39	-3.57	0.27	8.756e-42	1.316e-40
AO090009000682	1	1831188	1832448	1260	8756.71	1.32	0.1	1.355e-37	2.08e-36		AO090011000751	7	1922002	1923087	1085	165.08	4.92	0.37	8.957e-42	1.344e-40
AO090005001380	1	2758563	2760389	1826	360.38	-2.51	0.2	1.369e-37	2.099e-36		AO090005000995	1	3762449	3763790	1341	3643.63	2.24	0.17	1.003e-41	1.503e-40
AO090023000293	3	750900	752330	1430	140.66	-2.7	0.21	1.389e-37	2.126e-36		AO090026000207	3	4525919	4527764	1845	10603.6	-5.18	0.39	1.325e-41	1.983e-40
AO090026000708	3	3183583	3184022	439	58505.1	2.17	0.17	1.402e-37	2.144e-36		AO090012000562	4	1435747	1436240	493	1696.11	-1.96	0.15	1.363e-41	2.037e-40
AO090012000502	4	1268401	1273189	4788	14317.8	1.63	0.13	1.574e-37	2.403e-36		AO090011000431	7	1093009	1093611	602	956.4	-2.43	0.18	1.557e-41	2.323e-40
AO090038000215	6	3088887	3089673	786	213.47	2.31	0.18	1.627e-37	2.481e-36		AO090005000684	1	4629699	4631547	1848	635.15	-1.8	0.13	1.632e-41	2.432e-40
AO090026000133	3	4744673	4746840	2167	1971.6	1.54	0.12	1.872e-37	2.851e-36		AO090120000412	5	3787457	3788210	753	2192.35	1.65	0.12	1.684e-41	2.507e-40
AO090020000415	6	790125	792385	2260	28709.4	1.81	0.14	2.028e-37	3.084e-36		AO090001000175	2	393029	394902	1873	210.19	-3.7	0.28	1.84e-41	2.735e-40
AO090009000369	1	991255	993591	2336	3784.89	-1.55	0.12	2.17e-37	3.297e-36		AO090009000485	1	1284285	1285394	1109	35189.8	2.55	0.19	2.052e-41	3.046e-40
AO090003000876	2	4464880	4466788	1908	3845.49	-2.74	0.22	2.205e-37	3.345e-36		AO090001000704	2	1860081	1861875	1794	358.29	2.22	0.17	2.533e-41	3.755e-40
AO090011000876	7	2245721	2247905	2184	13057.7	2.24	0.18	2.449e-37	3.711e-36		AO090023000815	3	2122803	2123302	499	1461.78	1.76	0.13	2.647e-41	3.919e-40
AO090005001272	1	3049906	3050390	484	1343.83	1.23	0.1	2.46e-37	3.722e-36		AO090005000122	1	6114680	6116107	1427	1601.21	-4.69	0.35	3.019e-41	4.463e-40
AO090005001355	1	2810016	2810485	469	7159.21	3.19	0.25	2.484e-37	3.754e-36		AO090003001556	2	6254239	6256001	1762	696.13	-3.19	0.24	3.204e-41	4.731e-40
AO090001000736	2	1965929	1968185	2256	1729.07	1.23	0.1	2.509e-37	3.782e-36		AO090011000648	7	1683075	1684180	1105	4777.22	1.7	0.13	3.5e-41	5.161e-40
AO090010000534	8	1966397	1968178	1781	10183.8	-3.51	0.28	2.507e-37	3.782e-36		AO090001000298	2	765734	767437	1703	1893.57	-2.96	0.22	3.515e-41	5.177e-40
AO090009000446	1	1163106	1164254	1148	2247.22	-1.73	0.14	2.569e-37	3.867e-36		AO090023000856	3	2235942	2237061	1119	3737.36	2.18	0.16	3.727e-41	5.481e-40
AO090701000306	5	1539856	1540996	1140	1294.94	1.75	0.14	2.666e-37	4.008e-36		AO090003000129	2	2441781	2443721	1940	889.04	-3.84	0.29	3.938e-41	5.784e-40
AO090026000393	3	4004698	4005151	453	1034.95	1.34	0.11	2.753e-37	4.133e-36		AO090005000599	1	4859026	4861280	2254	7941.28	-2.77	0.21	4.433e-41	6.502e-40
AO090003000384	2	3118311	3120042	1731	5133.73	-3.32	0.26	2.774e-37	4.159e-36		AO090023000812	3	2113597	2115132	1535	694.29	2.38	0.18	4.494e-41	6.583e-40
AO090001000587	2	1539427	1541233	1806	1762.32	1.36	0.11	2.971e-37	4.449e-36		AO090003000706	2	3996810	4000132	3322	3091.12	-3.02	0.23	5.512e-41	8.063e-40
AO090020000434	6	735986	736660	674	202.45	2.67	0.21	3.331e-37	4.982e-36		AO090166000107	4	4848412	4850099	1687	328.09	2.54	0.19	5.573e-41	8.142e-40
AO090102000119	4	4229692	4230749	1057	657.95	1.56	0.12	3.537e-37	5.284e-36		AO090026000423	3	3930429	3931261	832	2089.21	1.64	0.12	5.892e-41	8.597e-40
AO090026000794	3	2974288	2976287	1999	6735.28	2.23	0.18	3.916e-37	5.842e-36		AO090003001024	2	4861466	4862804	1338	1026.36	1.94	0.15	5.911e-41	8.614e-40
AO090701000307	5	1536836	1539010	2174	2490.01	-2.9	0.23	4.54e-37	6.763e-36		AO090023000825	3	2151860	2153788	1928	764.28	2.11	0.16	6.4e-41	9.313e-40
AO090005000818	1	4229513	4230260	747	508.84	-2.74	0.22	5.517e-37	8.21e-36		AO090003001350	2	5753336	5754549	1213	799.25	2.24	0.17	7.615e-41	1.107e-39
AO090206000105	7	2858104	2859132	1028	1659.77	-1.04	0.08	6.043e-37	8.98e-36		AO090026000484	3	3755097	3757826	2729	346.32	-4.93	0.37	9.546e-41	1.386e-39
AO090009000121	1	329299	329902	603	173.18	2.58	0.21	6.308e-37	9.361e-36		AO090113000133	5	4362812	4363407	595	276.1	-4.72	0.36	1.068e-40	1.548e-39
AO090003001061	2	4949645	4951106	1461	908.87	1.1	0.09	6.554e-37	9.714e-36		AO090009000467	1	1231238	1231829	591	432.1	-2.89	0.22	1.149e-40	1.663e-39
AO090003000371	2	3088251	3090106	1855	4504.97	1.17	0.09	6.836e-37	1.011e-35		AO090023000012	3	32361	35300	2939	770.78	-5.62	0.43	1.249e-40	1.806e-39
AO090020000438	6	702139	703010	871	366.83	-2.08	0.17	6.841e-37	1.011e-35		AO090020000583	6	342362	343160	798	672.58	1.97	0.15	1.321e-40	1.908e-39
AO090103000029	8	1186828	1190085	3257	1482.65	-1.03	0.08	7.05e-37	1.041e-35		AO090026000138	3	4729842	4731723	1881	3994.51	2.31	0.18	1.636e-40	2.359e-39
AO090020000025	6	1761973	1765836	3863	10487.8	-1.19	0.1	7.27e-37	1.072e-35		AO090011000376	7	957160	959545	2385	11884.8	1.92	0.15	1.854e-40	2.67e-39
AO090001000590	2	1547450	1548328	878	1789.58	-2.87	0.23	7.285e-37	1.073e-35		AO090701000133	5	1985686	1986578	892	517.23	2.13	0.16	2.377e-40	3.418e-39
AO090005000830	1	4193081	4195329	2248	3253.35	1.74	0.14	8.063e-37	1.186e-35		AO090102000245	4	3885021	3886305	1284	2165.55	-2.12	0.16	2.466e-40	3.542e-39
AO090026000481	3	3765117	3765647	530	1399.78	-1.39	0.11	8.311e-37	1.221e-35		AO090003000277	2	2835182	2836071	889	2888.04	-6.36	0.49	2.54e-40	3.644e-39
AO090003000236	2	2714096	2715358	1262	6566.28	1.75	0.14	8.712e-37	1.278e-35		AO090005001102	1	3501869	3503197	1328	4629.81	-2.77	0.21	2.582e-40	3.699e-39
AO090023000153	3	386018	387056	1038	127.44	4.04	0.33	8.834e-37	1.294e-35		AO090701000658	5	636899	638603	1704	1559.16	-2.9	0.22	2.593e-40	3.71e-39
AO090023000439	3	1118639	1119115	476	72.78	3.6	0.29	9.551e-37	1.398e-35		AO090001000413	2	1041976	1042643	667	26154.5	2.63	0.2	2.666e-40	3.81e-39
AO090011000451	7	1143430	1145410	1980	78.77	3.3	0.27	9.816e-37	1.435e-35		AO090026000166	3	4651131	4651731	600	1044.8	1.91	0.15	2.782e-40	3.97e-39
AO090011000381	7	973978	975500	1522	6911.88	1.97	0.16	1.029e-36	1.503e-35		AO090038000422	6	2540190	2542458	2268	156	-4.98	0.38	3.94e-40	5.616e-39
AO090005001567	1	2232243	2234034	1791	6102.88	1.41	0.11	1.046e-36	1.526e-35		AO090003000141	2	2471487	2472159	672	3560.37	1.36	0.1	4.166e-40	5.93e-39
AO090120000341	5	3598112	3599489	1377	5459.85	-1.83	0.15	1.163e-36	1.693e-35		AO090120000306	5	3490171	3490726	555	1100.94	1.78	0.14	4.317e-40	6.138e-39
AO090166000123	4	4877902	4883545	5643	426.17	-2.58	0.21	1.248e-36	1.815e-35		AO090012000839	4	2157009	2158162	1153	249.18	-6.2	0.48	4.562e-40	6.477e-39
AO090003001484	2	6061575	6062211	636	437.08	1.88	0.15	1.337e-36	1.942e-35		AO090120000076	5	2857599	2858262	663	553.96	-2.44	0.19	4.758e-40	6.747e-39
AO090011000447	7	1128937	1131777	2840	1661.79	-2.96	0.24	1.407e-36	2.042e-35		AO090311000002	6	1880387	1883542	3155	2699.9	1.52	0.12	4.819e-40	6.825e-39
AO090009000214	1	580511	580916	405	379.03	-1.71	0.14	1.535e-36	2.223e-35		AO090102000091	4	4310588	4312079	1491	1389.14	-2.85	0.22	5.096e-40	7.208e-39
AO090113000104	5	4301468	4302647	1179	3319.65	1.73	0.14	1.602e-36	2.318e-35		AO090009000165	1	438416	439781	1365	108.69	4.56	0.35	6.577e-40	9.291e-39
AO090026000293	3	4278704	4280228	1524	3683.4	1.37	0.11	1.822e-36	2.63e-35		AO090005000799	1	4275162	4278951	3789	441.37	-5.26	0.4	7.269e-40	1.026e-38
AO090020000384	6	867109	868475	1366	1057.82	-1.43	0.11	2.029e-36	2.922e-35		AO090102000404	4	3419403	3420002	599	375.33	-3.54	0.27	7.353e-40	1.036e-38
AO090023000127	3	320581	322624	2043	9491.72	1.85	0.15	2.066e-36	2.97e-35		AO090010000173	8	2951546	2952182	636	718.48	-5.38	0.41	7.49e-40	1.054e-38
AO090026000292	3	4280668	4282360	1692	1989.8	-2.37	0.19	2.55e-36	3.658e-35		AO090012000479	4	1189668	1190526	858	428.9	2.94	0.23	7.84e-40	1.102e-38
AO090003000356	2	3049423	3051524	2101	4272.52	-3.3	0.27	2.698e-36	3.866e-35		AO090026000345	3	4125810	4127479	1669	456.1	2.01	0.15	1.022e-39	1.435e-38
AO090011000232	7	594464	595391	927	1755.29	-2.27	0.18	2.802e-36	4.009e-35		AO090138000007	6	4174742	4176494	1752	218.78	-5.11	0.39	1.048e-39	1.47e-38
AO090701000310	5	1531430	1532984	1554	5556.21	1.63	0.13	3.197e-36	4.569e-35		AO090012000525	4	1338547	1341370	2823	14002.5	-2.5	0.19	1.139e-39	1.594e-38
AO090023000944	3	2488463	2490507	2044	205.32	-2.41	0.19	3.338e-36	4.765e-35		AO090012000742	4	1889878	1890504	626	264.33	-5.1	0.39	1.331e-39	1.861e-38
AO090023000506	3	1323762	1325539	1777	642.06	-1.88	0.15	4.091e-36	5.825e-35		AO090012000579	4	1467802	1469746	1944	674.93	-4.94	0.38	1.409e-39	1.968e-38
AO090010000119	8	3090061	3091720	1659	8277.57	-2.08	0.17	5.154e-36	7.329e-35		AO090001000275	2	685609	687413	1804	310.11	3.27	0.25	1.49e-39	2.078e-38
AO090124000077	5	2491862	2494867	3005	4831.97	1.39	0.11	5.285e-36	7.507e-35		AO090011000036	7	98544	100674	2130	1577.77	-5.12	0.39	1.496e-39	2.083e-38
AO090011000211	7	547973	548882	909	161.12	1.82	0.15	5.732e-36	8.132e-35		AO090009000289	1	767044	768241	1197	6330.84	2.91	0.22	1.642e-39	2.285e-38
AO090009000646	1	1724292	1726969	2677	3054.73	-1.46	0.12	6.061e-36	8.588e-35		AO090003000679	2	3928821	3929414	593	47546.1	2.59	0.2	1.651e-39	2.295e-38
AO090003000844	2	4384473	4388581	4108	712.7	-2.07	0.17	6.187e-36	8.755e-35		AO090020000611	6	271592	274965	3373	2324.78	-2.93	0.23	1.683e-39	2.336e-38
AO090001000657	2	1729417	1731726	2309	20003.9	2.39	0.19	6.237e-36	8.815e-35		AO090012000354	4	872957	876667	3710	964.15	-2.61	0.2	1.7e-39	2.356e-38
AO090020000608	6	281827	282520	693	3535.29	1.91	0.15	6.605e-36	9.325e-35		AO090010000481	8	2105724	2106491	767	17571.3	2.05	0.16	1.711e-39	2.368e-38
AO090012000370	4	912112	913728	1616	429.42	-3.49	0.28	7.418e-36	1.046e-34		AO090103000095	8	1018238	1019863	1625	6962.85	-5.22	0.4	2.041e-39	2.823e-38
AO090003000967	2	4714016	4716498	2482	2916.49	1.56	0.13	7.454e-36	1.05e-34		AO090001000311	2	790971	794672	3701	578.31	-2.97	0.23	2.182e-39	3.014e-38
AO090003000515	2	3464406	3466246	1840	68.29	3.84	0.31	7.621e-36	1.072e-34		AO090003000144	2	2475741	2477840	2099	3110.99	2.77	0.21	2.886e-39	3.981e-38
AO090023000761	3	1991493	1993488	1995	1255.09	1.24	0.1	8.186e-36	1.15e-34		AO090701000206	5	1790572	1792253	1681	17281.9	3.42	0.27	4.695e-39	6.468e-38
AO090020000317	6	1039430	1042474	3044	913.03	-1.72	0.14	8.303e-36	1.165e-34		AO090003000705	2	3995822	3996360	538	2576.42	-2.49	0.19	4.84e-39	6.659e-38
AO090023000245	3	620827	622601	1774	10076.8	-1.75	0.14	9.008e-36	1.262e-34		AO090010000755	8	1432293	1434152	1859	1124.68	2.42	0.19	4.986e-39	6.851e-38
AO090003001020	2	4851668	4853564	1896	2000.96	1.77	0.14	9.491e-36	1.328e-34		AO090005000411	1	5371850	5373110	1260	1267.14	2.37	0.18	5.105e-39	7.006e-38
AO090038000135	6	3333030	3333852	822	725.31	-1.3	0.11	1.03e-35	1.439e-34		AO090701000780	5	312315	314638	2323	13950.6	-1.89	0.15	5.687e-39	7.795e-38
AO090001000363	2	916925	918931	2006	11300.9	-1.47	0.12	1.101e-35	1.535e-34		AO090005001028	1	3692032	3693746	1714	6344.02	-3.67	0.29	5.728e-39	7.842e-38
AO090005000427	1	5330925	5331818	893	497.37	-1.29	0.1	1.111e-35	1.547e-34		AO090120000194	5	3171652	3173400	1748	1855.47	1.4	0.11	5.969e-39	8.162e-38
AO090103000076	8	1060892	1061642	750	264.14	2.45	0.2	1.294e-35	1.794e-34		AO090012000332	4	815843	817489	1646	652.86	-2.17	0.17	6.235e-39	8.515e-38
AO090120000484	5	3984594	3987565	2971	7002.3	1.18	0.1	1.373e-35	1.901e-34		AO090102000125	4	4214534	4215763	1229	2675.25	-4.06	0.32	7.015e-39	9.568e-38
AO090023000349	3	890287	891557	1270	1229.42	-1.84	0.15	1.38e-35	1.909e-34		AO090011000901	7	2335633	2337179	1546	41859.9	1.68	0.13	1.025e-38	1.396e-37
AO090011000869	7	2220902	2222027	1125	1176.35	-3.32	0.27	1.397e-35	1.929e-34		AO090011000620	7	1590170	1592000	1830	3272.06	-3.21	0.25	1.198e-38	1.63e-37
AO090001000194	2	445067	445812	745	4255.03	2.25	0.18	1.416e-35	1.953e-34		AO090011000818	7	2078778	2079732	954	5967.13	-3.92	0.31	1.204e-38	1.637e-37
AO090038000274	6	2945242	2947302	2060	1918.41	1.18	0.1	1.548e-35	2.133e-34		AO090020000225	6	1257461	1259017	1556	438.63	-3.04	0.24	1.22e-38	1.656e-37
AO090012000581	4	1476617	1478942	2325	10972.8	1.38	0.11	1.592e-35	2.191e-34		AO090701000110	5	2070248	2071685	1437	2839.15	-1.61	0.12	1.232e-38	1.67e-37
AO090001000619	2	1619678	1621352	1674	894.04	-2	0.16	1.737e-35	2.386e-34		AO090003000514	2	3461381	3463435	2054	1546.54	2.04	0.16	1.25e-38	1.692e-37
AO090102000540	4	3057689	3060610	2921	8339.02	-1.26	0.1	1.742e-35	2.39e-34		AO090012000294	4	726810	729139	2329	1175.03	-2.34	0.18	1.285e-38	1.738e-37
AO090120000303	5	3481500	3482231	731	508.43	1.72	0.14	1.818e-35	2.491e-34		AO090011000060	7	182418	183785	1367	181.68	4.43	0.35	1.368e-38	1.848e-37
AO090038000234	6	3045457	3047182	1725	116.62	-3.03	0.25	1.967e-35	2.691e-34		AO090102000119	4	4229692	4230749	1057	1004.63	2.2	0.17	1.613e-38	2.176e-37
AO090005001337	1	2850096	2850512	416	548.5	1.39	0.11	2.005e-35	2.741e-34		AO090701000311	5	1528704	1530734	2030	3261.83	-3.54	0.28	1.655e-38	2.23e-37
AO090120000384	5	3695954	3697915	1961	2299.43	1.88	0.15	2.149e-35	2.934e-34		AO090003001359	2	5777168	5777645	477	122.97	3.5	0.27	2.199e-38	2.959e-37
AO090010000349	8	2426468	2429772	3304	203.4	4.38	0.36	2.209e-35	3.012e-34		AO090003000175	2	2570991	2572006	1015	10582.9	-5.6	0.44	2.422e-38	3.255e-37
AO090026000457	3	3835736	3836348	612	1716.34	1.26	0.1	2.218e-35	3.02e-34		AO090120000110	5	2954622	2955539	917	3440.21	2.24	0.17	2.745e-38	3.685e-37
AO090701000601	5	770098	774234	4136	3823.81	-2.89	0.24	2.462e-35	3.346e-34		AO090005000693	1	4597123	4598542	1419	624.69	-4.6	0.36	2.769e-38	3.713e-37
AO090010000032	8	3322996	3323953	957	1152.42	1.93	0.16	2.518e-35	3.418e-34		AO090010000623	8	1759262	1761736	2474	2070.2	3.17	0.25	2.82e-38	3.777e-37
AO090701000657	5	639210	639906	696	3188.71	1.68	0.14	2.552e-35	3.46e-34		AO090023000755	3	1975229	1975674	445	1568.35	1.84	0.14	2.985e-38	3.993e-37
AO090010000375	8	2347148	2348633	1485	700.85	-1.6	0.13	2.613e-35	3.538e-34		AO090012000690	4	1752739	1755562	2823	2405.16	2.5	0.2	3.472e-38	4.639e-37
AO090012000585	4	1488814	1489654	840	4590.08	1.81	0.15	2.633e-35	3.56e-34		AO090003001500	2	6102593	6110178	7585	7966.23	2.48	0.19	3.604e-38	4.809e-37
AO090103000018	8	1227420	1229265	1845	1232.98	-1.79	0.15	3.114e-35	4.207e-34		AO090120000043	5	2785372	2786752	1380	647.73	-3.28	0.26	3.864e-38	5.149e-37
AO090003000711	2	4007592	4008594	1002	810.49	1.29	0.11	3.337e-35	4.503e-34		AO090003000751	2	4111870	4113211	1341	8569.73	-3.96	0.31	3.911e-38	5.207e-37
AO090038000242	6	3024698	3025039	341	488.69	-1.85	0.15	3.703e-35	4.985e-34		AO090005001460	1	2562707	2564406	1699	351.07	2.47	0.19	4.366e-38	5.805e-37
AO090026000277	3	4330805	4331462	657	718.9	1.17	0.1	4.12e-35	5.533e-34		AO090003000022	2	2148844	2150171	1327	1441.73	-2.49	0.2	5.011e-38	6.655e-37
AO090001000684	2	1802748	1803468	720	7320.8	-1.35	0.11	4.529e-35	6.076e-34		AO090206000037	7	2671978	2672999	1021	2815.17	1.98	0.16	5.381e-38	7.138e-37
AO090009000063	1	179199	180216	1017	3057.14	-3.2	0.26	4.839e-35	6.484e-34		AO090001000612	2	1602178	1605089	2911	684.66	-2.46	0.19	5.423e-38	7.185e-37
AO090003001434	2	5953986	5956340	2354	704.74	-1.8	0.15	4.963e-35	6.642e-34		AO090120000067	5	2837716	2839759	2043	5869.49	-1.86	0.15	5.493e-38	7.268e-37
AO090166000096	4	4821983	4822896	913	363.42	-1.8	0.15	5.017e-35	6.706e-34		AO090102000613	4	2871824	2874692	2868	951.07	1.68	0.13	5.808e-38	7.676e-37
AO090012001019	4	2638699	2641066	2367	2823	1.08	0.09	5.394e-35	7.202e-34		AO090020000576	6	357010	358158	1148	1611.69	2.02	0.16	6.96e-38	9.189e-37
AO090005000179	1	5943768	5945031	1263	4663.4	2.3	0.19	5.936e-35	7.917e-34		AO090026000365	3	4077304	4079191	1887	4250.75	6.07	0.48	7.844e-38	1.034e-36
AO090010000166	8	2972480	2973319	839	837.73	2	0.16	6.041e-35	8.047e-34		AO090023000798	3	2071705	2072401	696	30944.1	2.71	0.21	8.683e-38	1.144e-36
AO090003000302	2	2911048	2912870	1822	2656	-1.39	0.11	6.443e-35	8.573e-34		AO090001000153	2	344158	346570	2412	90.57	4.08	0.32	9.022e-38	1.187e-36
AO090166000076	4	4773025	4774908	1883	11884.5	1.66	0.14	7.869e-35	1.043e-33		AO090124000072	5	2505579	2507981	2402	1943.51	-1.73	0.14	9.108e-38	1.197e-36
AO090003000790	2	4212885	4213577	692	114.83	-4.42	0.37	8.359e-35	1.106e-33		AO090003000268	2	2808423	2810097	1674	419.91	6.2	0.49	9.753e-38	1.28e-36
AO090005000392	1	5424489	5425933	1444	137.44	-2.54	0.21	8.352e-35	1.106e-33		AO090701000461	5	1136297	1137251	954	179.55	-6.05	0.48	1.056e-37	1.384e-36
AO090701000071	5	2161974	2162373	399	1438.96	-1.58	0.13	8.985e-35	1.187e-33		AO090026000498	3	3718897	3722748	3851	1740.83	1.44	0.11	1.165e-37	1.525e-36
AO090005000123	1	6111622	6114134	2512	524.47	-3.39	0.28	9.448e-35	1.247e-33		AO090005000091	1	6198939	6200560	1621	3859.65	1.78	0.14	1.18e-37	1.543e-36
AO090010000537	8	1959404	1960307	903	1254.48	-1.86	0.15	1.131e-34	1.491e-33		AO090023000772	3	2016021	2017137	1116	1333.13	3.48	0.28	1.186e-37	1.549e-36
AO090011000688	7	1767871	1768663	792	476.86	1.5	0.12	1.465e-34	1.927e-33		AO090001000474	2	1205532	1206527	995	841.9	-3.08	0.24	1.284e-37	1.676e-36
AO090120000112	5	2959173	2959864	691	117033	1.99	0.16	1.571e-34	2.064e-33		AO090009000009	1	38243	39400	1157	1358.91	5.82	0.46	1.332e-37	1.736e-36
AO090038000282	6	2922705	2924372	1667	1534.9	1.63	0.13	1.67e-34	2.192e-33		AO090038000181	6	3211546	3212549	1003	563.46	-7.33	0.59	1.478e-37	1.924e-36
AO090005000633	1	4760709	4762242	1533	356.83	-1.75	0.14	1.684e-34	2.207e-33		AO090120000411	5	3785702	3787036	1334	2384.97	1.89	0.15	1.491e-37	1.938e-36
AO090005000882	1	4074610	4076525	1915	3706.88	-1.94	0.16	1.703e-34	2.23e-33		AO090026000677	3	3256439	3257734	1295	3420.83	1.8	0.14	1.664e-37	2.161e-36
AO090701000116	5	2039383	2041898	2515	438.49	-1.48	0.12	1.717e-34	2.246e-33		AO090012000563	4	1436320	1436842	522	1149.49	-1.7	0.13	2.014e-37	2.611e-36
AO090020000489	6	576757	577342	585	2257.77	1.65	0.14	1.773e-34	2.317e-33		AO090010000153	8	3002270	3002912	642	661.46	3.36	0.27	2.179e-37	2.823e-36
AO090012000976	4	2530708	2533101	2393	5359.77	1.01	0.08	1.782e-34	2.325e-33		AO090003000690	2	3957619	3958427	808	2380.42	1.82	0.14	2.282e-37	2.953e-36
AO090120000425	5	3819464	3821477	2013	1639.3	-1.81	0.15	1.854e-34	2.417e-33		AO090026000450	3	3854698	3856591	1893	10285.8	2.3	0.18	2.317e-37	2.995e-36
AO090005001180	1	3299193	3299991	798	1382.58	-1.51	0.12	1.981e-34	2.579e-33		AO090012000602	4	1530839	1533169	2330	3795.24	-1.89	0.15	2.574e-37	3.323e-36
AO090011000493	7	1227378	1231787	4409	6379.82	-1.26	0.1	2.231e-34	2.899e-33		AO090026000210	3	4517958	4519251	1293	165.63	-5.62	0.45	2.624e-37	3.383e-36
AO090020000320	6	1026891	1028304	1413	1687.51	1.1	0.09	2.231e-34	2.899e-33		AO090102000594	4	2916698	2917589	891	649.4	1.92	0.15	3.3e-37	4.25e-36
AO090023000470	3	1206165	1208178	2013	450.8	1.94	0.16	2.333e-34	3.027e-33		AO090120000145	5	3039209	3040211	1002	1189.26	1.76	0.14	3.495e-37	4.497e-36
AO090003000180	2	2579955	2581524	1569	4912.59	1.9	0.16	2.414e-34	3.129e-33		AO090023000023	3	62697	64568	1871	286.29	-6.47	0.52	3.855e-37	4.953e-36
AO090023000708	3	1864592	1866215	1623	751.44	-1.25	0.1	2.514e-34	3.256e-33		AO090012000351	4	862119	863561	1442	37556.8	5.57	0.44	5.215e-37	6.693e-36
AO090005001356	1	2808215	2809418	1203	735.15	1.48	0.12	2.756e-34	3.565e-33		AO090038000305	6	2853290	2854401	1111	596.84	2.55	0.2	5.286e-37	6.777e-36
AO090001000265	2	659393	662514	3121	3368.55	1.73	0.14	3.016e-34	3.897e-33		AO090003000773	2	4177359	4179399	2040	987.45	-3.87	0.31	5.613e-37	7.188e-36
AO090005000198	1	5907388	5908993	1605	223.04	-2.02	0.17	3.153e-34	4.069e-33		AO090701000189	5	1837246	1839708	2462	548.91	2.21	0.18	5.706e-37	7.298e-36
AO090005000180	1	5943239	5943714	475	2394.51	2.23	0.18	3.371e-34	4.346e-33		AO090005000560	1	4960071	4961223	1152	193.13	4.34	0.35	5.901e-37	7.538e-36
AO090023000264	3	677862	679055	1193	10771.4	-2.36	0.2	3.459e-34	4.453e-33		AO090005001556	1	2260693	2262760	2067	82155.6	2.88	0.23	6.492e-37	8.285e-36
AO090003000638	2	3816650	3819377	2727	785.7	-1.71	0.14	3.561e-34	4.58e-33		AO090023000726	3	1909798	1913341	3543	849.14	2.69	0.22	6.593e-37	8.403e-36
AO090701000218	5	1762255	1764077	1822	1699.42	-1.43	0.12	3.813e-34	4.899e-33		AO090026000656	3	3315755	3316523	768	18368.7	2.45	0.2	7.588e-37	9.661e-36
AO090012000563	4	1436320	1436842	522	670.48	-2.54	0.21	3.998e-34	5.131e-33		AO090103000265	8	585566	586688	1122	414.37	-5.72	0.46	8.176e-37	1.04e-35
AO090003000105	2	2371223	2373055	1832	3934.83	-1.52	0.13	4.059e-34	5.204e-33		AO090026000669	3	3270077	3273827	3750	8966.89	-2.51	0.2	8.571e-37	1.089e-35
AO090011000486	7	1212780	1214549	1769	36729.9	1.72	0.14	4.174e-34	5.345e-33		AO090011000374	7	954494	955450	956	2180.32	-3.2	0.26	8.668e-37	1.1e-35
AO090005000850	1	4140421	4142117	1696	465	-1.69	0.14	4.207e-34	5.381e-33		AO090701000274	5	1618590	1621549	2959	229.05	-3.16	0.25	9.143e-37	1.159e-35
AO090009000428	1	1127166	1128984	1818	610.53	-1.42	0.12	4.638e-34	5.926e-33		AO090011000469	7	1181899	1182361	462	854.56	1.48	0.12	9.496e-37	1.202e-35
AO090003001467	2	6013818	6016053	2235	458.98	2.24	0.19	4.914e-34	6.272e-33		AO090003000383	2	3117092	3117976	884	29764.2	2.91	0.23	1.063e-36	1.344e-35
AO090120000058	5	2816285	2820334	4049	1565.72	-2.93	0.24	4.978e-34	6.346e-33		AO090020000626	6	221928	223976	2048	1220.92	1.99	0.16	1.101e-36	1.391e-35
AO090023000530	3	1408836	1410339	1503	323.62	-3.66	0.31	5.082e-34	6.472e-33		AO090010000713	8	1543987	1545228	1241	477.82	2.1	0.17	1.12e-36	1.412e-35
AO090026000139	3	4728241	4729340	1099	1002.15	1.99	0.17	5.482e-34	6.974e-33		AO090001000376	2	946665	948835	2170	2297.94	2.41	0.19	1.164e-36	1.466e-35
AO090003000211	2	2652999	2654295	1296	1267.39	-1.79	0.15	5.497e-34	6.985e-33		AO090005000676	1	4642702	4643410	708	665.03	-3.01	0.24	1.23e-36	1.548e-35
AO090701000890	5	41316	41768	452	205.38	-4.11	0.35	5.573e-34	7.074e-33		AO090701000313	5	1523136	1525722	2586	474.07	-5.87	0.47	1.297e-36	1.631e-35
AO090026000357	3	4102357	4102828	471	737.31	2.37	0.2	6.108e-34	7.744e-33		AO090011000367	7	944328	945378	1050	23453.2	2.68	0.22	1.313e-36	1.649e-35
AO090011000670	7	1727661	1728090	429	4346.18	1.17	0.1	6.568e-34	8.318e-33		AO090023000363	3	925627	926834	1207	1088.39	-6.27	0.51	1.417e-36	1.778e-35
AO090001000360	2	902580	906275	3695	258.32	-2.51	0.21	7.078e-34	8.955e-33		AO090010000067	8	3224222	3225020	798	205.63	-3.18	0.26	1.421e-36	1.78e-35
AO090005001229	1	3171621	3172741	1120	3653.77	-2.67	0.22	7.495e-34	9.471e-33		AO090102000053	4	4408359	4410229	1870	186.71	-3.91	0.31	1.56e-36	1.953e-35
AO090038000416	6	2554186	2555322	1136	184.75	-2.99	0.25	7.623e-34	9.612e-33		AO090012000795	4	2043704	2044396	692	241.73	-3.1	0.25	1.656e-36	2.071e-35
AO090038000032	6	3575111	3576734	1623	1172.36	2.03	0.17	8.034e-34	1.012e-32		AO090701000004	5	2346256	2349027	2771	4358.1	1.26	0.1	1.7e-36	2.123e-35
AO090701000114	5	2052564	2053673	1109	976.61	-1.27	0.11	9.27e-34	1.166e-32		AO090023000648	3	1703400	1704402	1002	575.69	1.99	0.16	1.708e-36	2.131e-35
AO090011000419	7	1067383	1068467	1084	1307.22	2.82	0.24	1.015e-33	1.275e-32		AO090012000488	4	1222068	1224216	2148	513.15	1.83	0.15	1.763e-36	2.197e-35
AO090102000040	4	4442675	4443744	1069	531.03	-2.15	0.18	1.067e-33	1.339e-32		AO090003001132	2	5191366	5192521	1155	35088.2	2.67	0.21	1.84e-36	2.29e-35
AO090005000729	1	4477770	4478241	471	4138.88	1.08	0.09	1.078e-33	1.351e-32		AO090012000237	4	586017	587064	1047	284.04	-3.51	0.28	2.049e-36	2.547e-35
AO090113000110	5	4312089	4313094	1005	5445.44	1.42	0.12	1.1e-33	1.377e-32		AO090102000538	4	3064765	3066544	1779	3600.85	-3.35	0.27	2.098e-36	2.606e-35
AO090009000551	1	1449468	1452382	2914	131.25	-3.19	0.27	1.225e-33	1.532e-32		AO090038000455	6	2455975	2458797	2822	2166.23	1.75	0.14	2.141e-36	2.656e-35
AO090003001130	2	5185615	5186301	686	919.8	-2.02	0.17	1.236e-33	1.544e-32		AO090001000373	2	938580	939314	734	2640.22	-4.61	0.37	2.202e-36	2.728e-35
AO090009000282	1	747874	749551	1677	11898.8	-2.69	0.23	1.248e-33	1.557e-32		AO090023000400	3	1027574	1028385	811	281.3	-6.92	0.56	2.25e-36	2.785e-35
AO090003001019	2	4850584	4851246	662	978.53	1.11	0.09	1.448e-33	1.804e-32		AO090001000481	2	1215473	1216277	804	10372.5	1.6	0.13	2.562e-36	3.167e-35
AO090003000081	2	2308459	2309829	1370	4541.16	1.56	0.13	1.476e-33	1.837e-32		AO090020000032	6	1739882	1740685	803	31473.9	2.35	0.19	2.568e-36	3.171e-35
AO090010000638	8	1723058	1723976	918	372.09	-2	0.17	1.536e-33	1.91e-32		AO090023000349	3	890287	891557	1270	7700.62	-2.44	0.2	2.587e-36	3.191e-35
AO090701000541	5	917728	922647	4919	310.57	-3.33	0.28	1.615e-33	2.006e-32		AO090023000863	3	2252861	2253734	873	620.9	2.43	0.2	3.925e-36	4.836e-35
AO090023000083	3	222802	224806	2004	929.46	-2.08	0.17	1.692e-33	2.099e-32		AO090023000476	3	1219281	1219959	678	3065.3	1.69	0.14	4.829e-36	5.943e-35
AO090005000965	1	3840410	3842368	1958	950.61	-1.07	0.09	2.03e-33	2.516e-32		AO090011000590	7	1493492	1494349	857	28312.7	2.49	0.2	5.093e-36	6.261e-35
AO090003001094	2	5068651	5070204	1553	3512.13	1.93	0.16	2.055e-33	2.544e-32		AO090103000008	8	1255998	1257434	1436	4000.99	1.39	0.11	5.609e-36	6.888e-35
AO090005000599	1	4859026	4861280	2254	1252.71	-1.35	0.11	2.064e-33	2.553e-32		AO090003000665	2	3882521	3884645	2124	548.2	2.24	0.18	5.711e-36	7.006e-35
AO090120000286	5	3418133	3418807	674	283.41	-2.46	0.21	2.132e-33	2.634e-32		AO090701000242	5	1705700	1706868	1168	369.65	-2.29	0.19	6.287e-36	7.704e-35
AO090103000167	8	833563	839335	5772	2406.19	-2.32	0.19	2.173e-33	2.682e-32		AO090003000111	2	2392723	2394617	1894	261.91	-2.28	0.19	6.518e-36	7.977e-35
AO090103000436	8	166090	167192	1102	1170.16	-2.14	0.18	2.272e-33	2.801e-32		AO090003001277	2	5554991	5556793	1802	2005.45	-2.72	0.22	6.81e-36	8.326e-35
AO090010000770	8	1388670	1389531	861	1412.47	-2.3	0.19	2.293e-33	2.824e-32		AO090001000712	2	1888437	1888909	472	8684.99	1.67	0.14	7.393e-36	9.028e-35
AO090003000603	2	3705066	3706274	1208	1052.25	1.74	0.15	2.501e-33	3.076e-32		AO090011000878	7	2249701	2250688	987	1164.43	-2.08	0.17	7.514e-36	9.166e-35
AO090701000252	5	1679913	1681445	1532	57.16	3.94	0.34	2.517e-33	3.093e-32		AO090001000589	2	1544850	1545458	608	2553.79	-2.08	0.17	7.577e-36	9.233e-35
AO090003000581	2	3645440	3646091	651	1546.98	-2.03	0.17	2.557e-33	3.139e-32		AO090026000650	3	3331756	3333628	1872	2602.25	1.29	0.1	7.769e-36	9.457e-35
AO090009000310	1	828300	828927	627	1515.56	1.14	0.1	2.593e-33	3.179e-32		AO090701000621	5	726534	728495	1961	985.05	3.45	0.28	7.843e-36	9.536e-35
AO090023000196	3	490504	491547	1043	4142.7	-1.36	0.12	2.701e-33	3.308e-32		AO090026000256	3	4392519	4396253	3734	1615.82	1.35	0.11	1.098e-35	1.334e-34
AO090701000401	5	1283489	1286492	3003	7714.61	1.7	0.14	2.801e-33	3.427e-32		AO090005001478	1	2518434	2520034	1600	1420.41	1.47	0.12	1.147e-35	1.391e-34
AO090038000498	6	2330828	2332772	1944	495.67	-3.37	0.29	2.807e-33	3.431e-32		AO090005001243	1	3127209	3129036	1827	1948.95	-2.02	0.16	1.203e-35	1.458e-34
AO090012000703	4	1781760	1783218	1458	204.34	-2.83	0.24	2.931e-33	3.579e-32		AO090026000396	3	3993089	3994740	1651	339.37	5.02	0.41	1.228e-35	1.486e-34
AO090103000166	8	840162	844146	3984	2015.08	-2.27	0.19	2.964e-33	3.616e-32		AO090010000445	8	2195493	2196517	1024	9398.28	2.69	0.22	1.488e-35	1.799e-34
AO090012000174	4	424042	424507	465	25800.5	2.27	0.19	2.978e-33	3.628e-32		AO090038000439	6	2498036	2500492	2456	267.46	-5.45	0.44	1.53e-35	1.848e-34
AO090005001160	1	3338621	3339450	829	948.79	-2.93	0.25	3.058e-33	3.722e-32		AO090003001547	2	6228897	6229715	818	158.45	-5.29	0.43	1.815e-35	2.19e-34
AO090038000494	6	2344139	2345683	1544	645.21	-1.38	0.12	3.066e-33	3.728e-32		AO090009000691	1	1850193	1851977	1784	8627.13	2.1	0.17	2.161e-35	2.604e-34
AO090012000786	4	2023418	2024057	639	1065.44	-1.63	0.14	3.32e-33	4.033e-32		AO090102000639	4	2802025	2805374	3349	18612.2	-1.66	0.13	2.269e-35	2.732e-34
AO090102000393	4	3449280	3450434	1154	6105.45	-1	0.08	3.415e-33	4.144e-32		AO090012000292	4	725371	725915	544	1031.33	-1.91	0.16	2.511e-35	3.02e-34
AO090023000945	3	2492253	2495630	3377	1697.89	-1.15	0.1	4.362e-33	5.281e-32		AO090005001140	1	3396212	3402138	5926	1538.6	-2.61	0.21	2.601e-35	3.124e-34
AO090010000202	8	2865665	2867343	1678	11136.5	-2.6	0.22	4.5e-33	5.443e-32		AO090023000346	3	881035	882417	1382	373.89	-2.75	0.23	2.855e-35	3.426e-34
AO090001000186	2	425774	426272	498	12512.6	-1.99	0.17	5.145e-33	6.21e-32		AO090011000296	7	751640	753784	2144	630.9	-2.35	0.19	3.093e-35	3.708e-34
AO090701000470	5	1115066	1116218	1152	248.32	-2.02	0.17	5.14e-33	6.21e-32		AO090003001348	2	5744805	5747061	2256	1483.3	1.9	0.15	3.163e-35	3.787e-34
AO090011000768	7	1958435	1959908	1473	2188.94	1.27	0.11	5.162e-33	6.224e-32		AO090103000446	8	140516	141306	790	7469.53	-1.77	0.14	3.239e-35	3.875e-34
AO090012000831	4	2138539	2139916	1377	280.35	1.58	0.13	5.205e-33	6.27e-32		AO090020000575	6	358460	359316	856	2723.69	1.92	0.16	3.282e-35	3.922e-34
AO090005000802	1	4269850	4270596	746	907.36	1.58	0.13	5.597e-33	6.728e-32		AO090011000474	7	1191277	1193253	1976	860.59	-2	0.16	3.509e-35	4.189e-34
AO090003000288	2	2869518	2871453	1935	675.09	1.16	0.1	5.843e-33	7.016e-32		AO090001000495	2	1266175	1267003	828	7399.18	2.48	0.2	4.065e-35	4.847e-34
AO090102000216	4	3980171	3981393	1222	120.75	-2.62	0.22	6.405e-33	7.684e-32		AO090701000729	5	433467	434905	1438	1885.88	3.19	0.26	4.216e-35	5.022e-34
AO090020000396	6	833901	834831	930	3529.11	1.73	0.15	6.939e-33	8.315e-32		AO090701000410	5	1259271	1261080	1809	206.18	-4.52	0.37	4.325e-35	5.146e-34
AO090038000395	6	2622988	2624374	1386	172753	1.83	0.15	7.079e-33	8.474e-32		AO090003000956	2	4681444	4683560	2116	3938.95	1.46	0.12	4.464e-35	5.306e-34
AO090020000063	6	1651638	1652958	1320	814.81	1.41	0.12	7.124e-33	8.519e-32		AO090103000150	8	877082	878069	987	254.7	-2.67	0.22	4.827e-35	5.731e-34
AO090011000043	7	121831	142723	20892	1337.67	-1.09	0.09	7.273e-33	8.688e-32		AO090001000338	2	851514	852064	550	1903.25	1.63	0.13	5.123e-35	6.076e-34
AO090138000058	6	4073526	4074321	795	95.61	2.92	0.25	7.457e-33	8.899e-32		AO090010000385	8	2327340	2328856	1516	521.55	-2.86	0.24	5.27e-35	6.243e-34
AO090012000217	4	540303	541488	1185	2408.71	-1.6	0.14	7.925e-33	9.438e-32		AO090005001498	1	2457056	2459811	2755	2083.11	1.54	0.13	5.947e-35	7.039e-34
AO090120000060	5	2824592	2825667	1075	594.48	-2.27	0.19	8.027e-33	9.55e-32		AO090003000626	2	3772718	3776234	3516	977.6	-2.7	0.22	6.113e-35	7.226e-34
AO090012000784	4	2017966	2020112	2146	2305.45	-1.5	0.13	8.375e-33	9.953e-32		AO090102000298	4	3723048	3724410	1362	4929.54	-2.42	0.2	6.248e-35	7.379e-34
AO090701000508	5	1014034	1016602	2568	2294.54	-2.98	0.25	8.717e-33	1.035e-31		AO090020000595	6	312133	313438	1305	343.68	-2.61	0.22	7.164e-35	8.451e-34
AO090003000789	2	4208233	4210221	1988	3033.62	-2.01	0.17	9.513e-33	1.128e-31		AO090011000518	7	1299269	1300672	1403	2253.62	2.43	0.2	7.187e-35	8.469e-34
AO090103000023	8	1207792	1209189	1397	707.98	1.63	0.14	9.775e-33	1.158e-31		AO090005000379	1	5461911	5463340	1429	834.19	2.23	0.18	7.414e-35	8.727e-34
AO090003001358	2	5776585	5777104	519	179.97	-2.91	0.25	9.904e-33	1.172e-31		AO090005000061	1	6273278	6274141	863	515.09	3.64	0.3	8.134e-35	9.565e-34
AO090023000500	3	1306203	1307211	1008	6196.11	-1.16	0.1	1.004e-32	1.187e-31		AO090026000545	3	3587979	3588988	1009	799.92	2.03	0.17	8.306e-35	9.757e-34
AO090023000382	3	981293	984697	3404	17738.2	-2.68	0.23	1.048e-32	1.238e-31		AO090026000346	3	4122910	4125414	2504	1935.21	1.76	0.14	8.364e-35	9.815e-34
AO090003000392	2	3138062	3140029	1967	6134.12	1.39	0.12	1.059e-32	1.249e-31		AO090003001232	2	5447352	5449826	2474	3656.08	1.69	0.14	8.932e-35	1.047e-33
AO090011000183	7	483032	484646	1614	402.87	-2.87	0.24	1.084e-32	1.277e-31		AO090038000058	6	3517024	3518145	1121	1241.75	-3.4	0.28	1.113e-34	1.304e-33
AO090023000863	3	2252861	2253734	873	1514.6	1.41	0.12	1.094e-32	1.289e-31		AO090120000165	5	3104252	3105630	1378	2530.32	-1.87	0.15	1.166e-34	1.364e-33
AO090166000094	4	4818861	4820102	1241	738.88	2.24	0.19	1.12e-32	1.317e-31		AO090010000224	8	2803151	2803899	748	1102.81	2.42	0.2	1.204e-34	1.406e-33
AO090038000016	6	3624335	3625351	1016	1408.46	-1.49	0.13	1.135e-32	1.334e-31		AO090003000957	2	4684061	4687922	3861	2030.7	1.53	0.13	1.428e-34	1.667e-33
AO090020000416	6	787694	789033	1339	1273.46	-1.15	0.1	1.26e-32	1.479e-31		AO090001000304	2	776106	777009	903	8605.79	3.58	0.3	1.449e-34	1.689e-33
AO090020000705	6	39842	40677	835	926.95	-1.21	0.1	1.331e-32	1.561e-31		AO090038000570	6	2110087	2111249	1162	385.86	-3.9	0.32	1.484e-34	1.728e-33
AO090120000166	5	3106904	3108592	1688	1393.88	1.21	0.1	1.346e-32	1.577e-31		AO090005001568	1	2230377	2231741	1364	2136.13	1.86	0.15	1.626e-34	1.892e-33
AO090005001530	1	2348484	2350195	1711	13043.6	2.25	0.19	1.362e-32	1.594e-31		AO090102000329	4	3651109	3652334	1225	208.73	-5.44	0.45	1.651e-34	1.919e-33
AO090026000772	3	3027297	3027707	410	3914.94	-1.19	0.1	1.384e-32	1.617e-31		AO090120000285	5	3412315	3416304	3989	312.19	2.67	0.22	1.856e-34	2.155e-33
AO090009000635	1	1693782	1695877	2095	901.7	-2.39	0.2	1.399e-32	1.632e-31		AO090701000167	5	1890531	1891302	771	11039.7	1.95	0.16	2.12e-34	2.459e-33
AO090005001088	1	3538983	3540564	1581	1982.05	1.53	0.13	1.603e-32	1.869e-31		AO090010000531	8	1975074	1975911	837	2378.12	-3.21	0.27	2.259e-34	2.618e-33
AO090001000414	2	1043515	1049781	6266	4208.79	-2.08	0.18	1.619e-32	1.885e-31		AO090012000392	4	963724	964549	825	605.51	-2.8	0.23	2.291e-34	2.652e-33
AO090023000893	3	2337724	2339115	1391	10476.7	2.09	0.18	1.643e-32	1.911e-31		AO090012000061	4	140653	141145	492	238.36	-4.41	0.37	2.307e-34	2.667e-33
AO090010000518	8	2007275	2008964	1689	704.2	-3.3	0.28	1.717e-32	1.995e-31		AO090001000143	2	319571	320627	1056	1627.17	-3.48	0.29	2.538e-34	2.931e-33
AO090026000140	3	4725655	4727729	2074	10902.9	1.39	0.12	1.752e-32	2.034e-31		AO090038000124	6	3351259	3351890	631	188.89	-4.29	0.36	2.551e-34	2.943e-33
AO090009000026	1	79368	80473	1105	915.77	-2.18	0.19	2.124e-32	2.463e-31		AO090003000222	2	2678883	2682096	3213	2291.31	2.08	0.17	2.571e-34	2.964e-33
AO090001000423	2	1065532	1067310	1778	328.41	-3.27	0.28	2.153e-32	2.495e-31		AO090012000601	4	1527093	1530160	3067	21513.9	-2.52	0.21	2.606e-34	3e-33
AO090012000353	4	869732	871079	1347	351	1.98	0.17	2.217e-32	2.567e-31		AO090026000251	3	4410744	4414212	3468	2642.03	-2.75	0.23	2.634e-34	3.03e-33
AO090020000056	6	1669507	1671088	1581	4064.4	1.25	0.11	2.355e-32	2.723e-31		AO090020000362	6	927271	928975	1704	214.62	-2.82	0.24	2.989e-34	3.435e-33
AO090003001392	2	5856977	5858466	1489	582.31	-3.77	0.33	2.471e-32	2.855e-31		AO090012000931	4	2399366	2400116	750	1421.34	2.73	0.23	3.107e-34	3.567e-33
AO090005001580	1	2196282	2197412	1130	4156.89	1.02	0.09	2.775e-32	3.203e-31		AO090103000007	8	1258823	1261081	2258	27749.2	2.16	0.18	3.197e-34	3.666e-33
AO090023000279	3	721932	723555	1623	318.45	-2.13	0.18	2.936e-32	3.385e-31		AO090701000226	5	1738879	1740999	2120	1325.38	1.7	0.14	3.267e-34	3.743e-33
AO090120000210	5	3214690	3216262	1572	2242.49	1.42	0.12	2.995e-32	3.45e-31		AO090023000997	3	2636511	2637461	950	3753.74	1.76	0.15	3.694e-34	4.227e-33
AO090026000432	3	3894409	3897214	2805	1493.84	-1.14	0.1	3.219e-32	3.704e-31		AO090102000502	4	3165468	3166797	1329	26703.9	2.82	0.24	3.876e-34	4.431e-33
AO090001000277	2	688719	700560	11841	1316.12	1.26	0.11	3.394e-32	3.902e-31		AO090003000418	2	3197473	3198118	645	1604.26	1.84	0.15	4.127e-34	4.713e-33
AO090701000324	5	1490424	1492599	2175	1211.41	2.32	0.2	3.628e-32	4.167e-31		AO090005000029	1	6352303	6353098	795	465.68	-2.11	0.18	4.287e-34	4.891e-33
AO090020000288	6	1103833	1105769	1936	2288.02	-3.5	0.3	3.801e-32	4.361e-31		AO090009000424	1	1118474	1118928	454	3710.07	1.68	0.14	4.834e-34	5.509e-33
AO090103000442	8	153087	154525	1438	1028.3	-1.45	0.12	3.922e-32	4.495e-31		AO090005001225	1	3183865	3184688	823	37181.9	2.34	0.2	4.905e-34	5.584e-33
AO090102000298	4	3723048	3724410	1362	1173.16	-2.56	0.22	4.022e-32	4.605e-31		AO090005001580	1	2196282	2197412	1130	2778.51	2.15	0.18	5.685e-34	6.466e-33
AO090120000186	5	3152241	3152917	676	2102.22	1.18	0.1	4.178e-32	4.779e-31		AO090011000307	7	779477	780422	945	223.01	-2.52	0.21	5.836e-34	6.631e-33
AO090102000220	4	3963855	3964557	702	785.36	1.13	0.1	4.187e-32	4.784e-31		AO090003000444	2	3274021	3275794	1773	5024.43	-1.99	0.17	7.229e-34	8.205e-33
AO090011000474	7	1191277	1193253	1976	381.79	-2.1	0.18	4.275e-32	4.88e-31		AO090026000057	3	4973404	4975744	2340	44653.8	-2.61	0.22	7.658e-34	8.683e-33
AO090009000392	1	1046545	1046916	371	222.77	-1.97	0.17	4.751e-32	5.419e-31		AO090003000215	2	2659514	2660047	533	2582.29	1.78	0.15	8.316e-34	9.419e-33
AO090011000759	7	1943792	1944668	876	1070.02	1.12	0.1	5.597e-32	6.371e-31		AO090102000525	4	3095389	3097080	1691	4061.28	1.75	0.15	8.363e-34	9.464e-33
AO090005000416	1	5359498	5363052	3554	12325.5	1.6	0.14	5.808e-32	6.592e-31		AO090009000070	1	198725	200379	1654	180.49	-2.95	0.25	8.462e-34	9.565e-33
AO090012000537	4	1368310	1369579	1269	3743.67	1.2	0.1	6.194e-32	7.022e-31		AO090103000285	8	537306	538208	902	271.14	-4.68	0.39	9.538e-34	1.077e-32
AO090005001538	1	2325749	2326723	974	7063.51	-1.79	0.15	6.24e-32	7.068e-31		AO090120000498	5	4016804	4017338	534	1741.42	1.83	0.15	9.891e-34	1.116e-32
AO090701000681	5	578855	581961	3106	901.5	-1.45	0.13	6.309e-32	7.139e-31		AO090102000291	4	3737718	3739402	1684	3740.28	1.75	0.15	1.101e-33	1.241e-32
AO090102000444	4	3321124	3321537	413	791.32	-1.5	0.13	6.467e-32	7.311e-31		AO090005001457	1	2571379	2572547	1168	3204.34	-3.25	0.27	1.113e-33	1.253e-32
AO090011000397	7	1016254	1017416	1162	124.98	-3.35	0.29	6.819e-32	7.701e-31		AO090701000633	5	700352	703073	2721	276.79	-4.53	0.38	1.15e-33	1.293e-32
AO090012000447	4	1120342	1120734	392	6102.15	2.11	0.18	8.631e-32	9.739e-31		AO090012001004	4	2597454	2598333	879	6084.03	1.87	0.16	1.158e-33	1.301e-32
AO090011000164	7	435511	436360	849	547.97	-1.32	0.11	8.976e-32	1.012e-30		AO090003001006	2	4820672	4823042	2370	1763.01	5.27	0.44	1.266e-33	1.421e-32
AO090005000078	1	6225108	6226281	1173	336.86	-1.75	0.15	1.116e-31	1.256e-30		AO090113000195	5	4501652	4504027	2375	159	-6.15	0.52	1.344e-33	1.507e-32
AO090120000007	5	2710088	2711229	1141	711.19	-1.2	0.1	1.155e-31	1.299e-30		AO090001000583	2	1531913	1532415	502	1638.9	2.04	0.17	1.373e-33	1.538e-32
AO090003001538	2	6211848	6212631	783	196.59	-1.98	0.17	1.19e-31	1.337e-30		AO090023000114	3	287495	289444	1949	2328.63	1.35	0.11	1.564e-33	1.75e-32
AO090003001097	2	5076198	5080650	4452	17213.5	1.7	0.15	1.22e-31	1.37e-30		AO090023000307	3	781752	783120	1368	903.07	1.82	0.15	1.632e-33	1.824e-32
AO090009000480	1	1266275	1268185	1910	2319.1	1.73	0.15	1.269e-31	1.424e-30		AO090038000508	6	2303752	2306046	2294	133.57	-4.31	0.36	1.675e-33	1.871e-32
AO090023001003	3	2645904	2647431	1527	3605.29	-1.11	0.1	1.311e-31	1.469e-30		AO090011000267	7	684544	687575	3031	588.66	2.18	0.18	1.739e-33	1.94e-32
AO090023000647	3	1698414	1701724	3310	2810.44	1.36	0.12	1.407e-31	1.573e-30		AO090001000292	2	724895	725715	820	176.13	-4.99	0.42	1.773e-33	1.976e-32
AO090026000559	3	3553096	3554390	1294	389.53	-3.8	0.33	1.57e-31	1.752e-30		AO090005001295	1	2949731	2950845	1114	6897.02	-2.28	0.19	2.003e-33	2.23e-32
AO090003000493	2	3419286	3420123	837	214.46	-2.6	0.23	1.589e-31	1.773e-30		AO090023000850	3	2221664	2222539	875	1489.78	1.74	0.15	2.232e-33	2.482e-32
AO090011000238	7	607706	609373	1667	5574.77	-3.17	0.28	1.737e-31	1.933e-30		AO090005001579	1	2197744	2198494	750	454.81	2.09	0.18	2.236e-33	2.485e-32
AO090038000553	6	2158256	2159618	1362	3499.66	2.4	0.21	1.852e-31	2.06e-30		AO090113000104	5	4301468	4302647	1179	2021.63	1.46	0.12	2.963e-33	3.289e-32
AO090023000272	3	700155	702705	2550	424.32	-1.43	0.12	1.939e-31	2.154e-30		AO090011000619	7	1589056	1589973	917	430.23	-1.68	0.14	3.174e-33	3.52e-32
AO090701000809	5	245518	247216	1698	311.16	-1.56	0.14	1.956e-31	2.171e-30		AO090120000230	5	3280346	3281973	1627	1819.92	-1.8	0.15	3.265e-33	3.617e-32
AO090011000295	7	750194	751218	1024	146.27	-3.21	0.28	1.958e-31	2.171e-30		AO090206000047	7	2696954	2698061	1107	35037.9	2.46	0.21	3.671e-33	4.063e-32
AO090120000272	5	3389919	3392646	2727	1476.89	-1.64	0.14	1.972e-31	2.184e-30		AO090011000954	7	2499731	2500775	1044	49535	3.03	0.26	3.847e-33	4.254e-32
AO090011000802	7	2045091	2046110	1019	5180.53	-2.07	0.18	2.145e-31	2.374e-30		AO090023000213	3	533232	534436	1204	156.17	-4.2	0.36	4.029e-33	4.45e-32
AO090005000447	1	5260732	5261816	1084	299.97	-1.8	0.16	2.195e-31	2.427e-30		AO090005000072	1	6238130	6239893	1763	2109.18	1.22	0.1	4.075e-33	4.497e-32
AO090011000917	7	2392786	2395052	2266	886.94	-1.44	0.13	2.381e-31	2.63e-30		AO090001000480	2	1214391	1215255	864	9573.02	1.52	0.13	4.12e-33	4.536e-32
AO090038000279	6	2936115	2937151	1036	33134.6	1.57	0.14	2.424e-31	2.675e-30		AO090701000367	5	1365960	1366863	903	407.76	-3.21	0.27	4.117e-33	4.536e-32
AO090003000044	2	2207340	2209411	2071	318.61	-2.81	0.24	2.536e-31	2.796e-30		AO090010000386	8	2325303	2326801	1498	327.65	-2.72	0.23	4.435e-33	4.879e-32
AO090102000549	4	3028408	3032227	3819	1509.31	-1.38	0.12	2.638e-31	2.906e-30		AO090011000596	7	1514260	1514951	691	23181.3	2.5	0.21	4.942e-33	5.431e-32
AO090012000626	4	1602265	1603111	846	39482.2	-2.22	0.19	2.716e-31	2.989e-30		AO090005001418	1	2671173	2672606	1433	155.17	-2.8	0.24	5.075e-33	5.572e-32
AO090005000583	1	4899389	4899857	468	62098.2	2.35	0.2	2.886e-31	3.173e-30		AO090003000371	2	3088251	3090106	1855	3211.15	1.73	0.15	5.096e-33	5.589e-32
AO090113000065	5	4206295	4208093	1798	180.71	-2.58	0.22	2.934e-31	3.222e-30		AO090020000501	6	546064	548780	2716	1247.71	2.59	0.22	5.271e-33	5.775e-32
AO090009000593	1	1578255	1579697	1442	1584.44	-3.29	0.29	3.04e-31	3.336e-30		AO090010000466	8	2147953	2148657	704	2546.9	1.26	0.11	5.301e-33	5.802e-32
AO090003001336	2	5713265	5714693	1428	34183.1	-3.24	0.28	3.17e-31	3.475e-30		AO090003000153	2	2507401	2508517	1116	185.76	-2.32	0.2	5.308e-33	5.805e-32
AO090003000253	2	2766429	2768245	1816	8219.58	-1.19	0.1	3.196e-31	3.5e-30		AO090038000295	6	2889698	2890636	938	33353.7	2.35	0.2	5.551e-33	6.065e-32
AO090012000313	4	771967	772884	917	1672.13	-3.28	0.29	3.397e-31	3.716e-30		AO090120000006	5	2705448	2706246	798	192.5	2.3	0.2	5.573e-33	6.083e-32
AO090005000735	1	4460567	4462078	1511	726.05	1.24	0.11	3.422e-31	3.741e-30		AO090005001197	1	3261537	3262931	1394	8870.66	-3.02	0.26	5.648e-33	6.158e-32
AO090003000129	2	2441781	2443721	1940	644.45	-3.06	0.27	4.08e-31	4.455e-30		AO090012000950	4	2470622	2472139	1517	3333.08	1.41	0.12	5.689e-33	6.197e-32
AO090023000337	3	862676	863792	1116	2596.97	-1.38	0.12	4.315e-31	4.708e-30		AO090009000698	1	1864227	1865090	863	29089	2.28	0.19	5.722e-33	6.226e-32
AO090003001170	2	5275182	5277228	2046	1861.76	1.36	0.12	4.705e-31	5.128e-30		AO090103000130	8	921407	923003	1596	205.05	-3.33	0.28	6.506e-33	7.073e-32
AO090010000090	8	3179628	3180076	448	1150.38	-2.91	0.25	4.931e-31	5.369e-30		AO090026000332	3	4169818	4170445	627	648.66	1.69	0.14	6.816e-33	7.403e-32
AO090023000557	3	1470143	1472820	2677	83.58	3.99	0.36	4.979e-31	5.417e-30		AO090701000223	5	1749491	1750640	1149	3128.51	-1.97	0.17	7.008e-33	7.603e-32
AO090012000625	4	1600135	1600478	343	11805.5	-2.23	0.2	5.016e-31	5.452e-30		AO090038000553	6	2158256	2159618	1362	161.1	4.45	0.38	7.654e-33	8.297e-32
AO090010000382	8	2332880	2334030	1150	157.3	-3.23	0.28	5.339e-31	5.798e-30		AO090009000301	1	800324	801275	951	2947.08	1.87	0.16	8.053e-33	8.721e-32
AO090701000346	5	1415744	1416707	963	901.07	-2.81	0.25	5.523e-31	5.992e-30		AO090166000070	4	4750013	4751660	1647	9480.59	9.4	0.82	8.399e-33	9.086e-32
AO090005000536	1	5021570	5024414	2844	2308.07	-1.58	0.14	6.099e-31	6.605e-30		AO090102000220	4	3963855	3964557	702	471.77	1.78	0.15	8.605e-33	9.301e-32
AO090005000125	1	6109651	6110934	1283	1021.87	-3.27	0.29	6.612e-31	7.153e-30		AO090026000174	3	4630812	4631398	586	351.95	-6.16	0.53	8.759e-33	9.457e-32
AO090701000110	5	2070248	2071685	1437	2551.1	-1.49	0.13	6.838e-31	7.391e-30		AO090001000519	2	1351882	1353479	1597	4653.57	2.36	0.2	8.809e-33	9.502e-32
AO090020000315	6	1044017	1045930	1913	1629.02	-2.32	0.2	6.97e-31	7.527e-30		AO090103000165	8	845144	847088	1944	1013.93	4.32	0.37	1.045e-32	1.126e-31
AO090012000317	4	787055	787674	619	3530.75	-2.24	0.2	7.886e-31	8.508e-30		AO090010000065	8	3226871	3229621	2750	427.76	2.71	0.23	1.176e-32	1.267e-31
AO090003001008	2	4825722	4827341	1619	1329.9	-1.51	0.13	8.15e-31	8.784e-30		AO090026000052	3	4986584	4987789	1205	475.64	-5.66	0.49	1.267e-32	1.363e-31
AO090003001446	2	5976639	5977382	743	399.9	1.68	0.15	8.25e-31	8.884e-30		AO090701000430	5	1207582	1208503	921	161	-4.89	0.42	1.374e-32	1.476e-31
AO090023000602	3	1585266	1587665	2399	3004.84	-2.47	0.22	9.213e-31	9.903e-30		AO090009000629	1	1676226	1678762	2536	47569	2.92	0.25	1.497e-32	1.607e-31
AO090020000339	6	982810	984539	1729	7285.61	-1.9	0.17	9.492e-31	1.019e-29		AO090003000867	2	4446550	4448811	2261	1404.57	1.76	0.15	1.645e-32	1.764e-31
AO090012000973	4	2523290	2524456	1166	1338.8	1.64	0.14	9.626e-31	1.033e-29		AO090023000066	3	179395	180157	762	578.28	-1.97	0.17	1.709e-32	1.831e-31
AO090003001007	2	4823588	4824803	1215	12300.9	2.86	0.25	9.774e-31	1.048e-29		AO090012000004	4	17065	17842	777	804.9	-1.65	0.14	1.711e-32	1.832e-31
AO090003000497	2	3427034	3428538	1504	367.56	-1.68	0.15	9.991e-31	1.07e-29		AO090011000651	7	1692150	1693665	1515	901.69	2.35	0.2	1.761e-32	1.883e-31
AO090012000944	4	2437678	2441206	3528	1073.32	-1.24	0.11	1.017e-30	1.089e-29		AO090010000529	8	1977636	1979286	1650	809.4	-4.65	0.4	1.978e-32	2.113e-31
AO090012000536	4	1366813	1367623	810	1615.21	1.47	0.13	1.021e-30	1.091e-29		AO090010000722	8	1523832	1526088	2256	9783.31	-5.58	0.48	2.141e-32	2.285e-31
AO090012000354	4	872957	876667	3710	277.22	-1.94	0.17	1.03e-30	1.1e-29		AO090103000343	8	392003	393184	1181	5224.23	-4.24	0.36	2.294e-32	2.446e-31
AO090012000109	4	267771	270241	2470	411.12	-3.61	0.32	1.042e-30	1.112e-29		AO090005000698	1	4579971	4580970	999	160.44	-4.76	0.41	2.512e-32	2.676e-31
AO090701000343	5	1430679	1431623	944	4197.53	2.44	0.21	1.071e-30	1.141e-29		AO090011000315	7	793908	795792	1884	125.76	-4.96	0.43	2.563e-32	2.728e-31
AO090003000026	2	2159563	2165355	5792	2259.83	-1.03	0.09	1.179e-30	1.255e-29		AO090103000057	8	1101193	1102296	1103	250.59	-3.63	0.31	2.572e-32	2.735e-31
AO090012000987	4	2555330	2558468	3138	930.28	1.04	0.09	1.419e-30	1.508e-29		AO090012000491	4	1227297	1228279	982	479.54	-3.38	0.29	3.012e-32	3.2e-31
AO090701000104	5	2084365	2085091	726	318.83	-2.21	0.2	1.419e-30	1.508e-29		AO090020000491	6	571211	573787	2576	1297.21	1.67	0.14	3.425e-32	3.634e-31
AO090026000164	3	4653619	4655365	1746	2506.11	1.12	0.1	1.437e-30	1.526e-29		AO090009000412	1	1085636	1086575	939	17438.1	2.53	0.22	3.621e-32	3.839e-31
AO090023000654	3	1724208	1725353	1145	24130.8	2.07	0.18	1.453e-30	1.542e-29		AO090701000896	5	26859	28009	1150	571.02	-4.5	0.39	3.671e-32	3.888e-31
AO090102000337	4	3624314	3628744	4430	48.29	3.86	0.35	1.461e-30	1.548e-29		AO090010000627	8	1744296	1744704	408	309.59	-2.25	0.19	3.686e-32	3.9e-31
AO090012000232	4	574277	575237	960	2007.97	-2.88	0.26	1.555e-30	1.647e-29		AO090026000144	3	4714915	4718753	3838	305.65	4.19	0.36	3.721e-32	3.933e-31
AO090166000093	4	4816297	4818149	1852	313.58	2.27	0.2	1.642e-30	1.738e-29		AO090005000479	1	5163412	5165683	2271	1505.66	2.43	0.21	3.803e-32	4.016e-31
AO090009000228	1	610957	612342	1385	1968.44	1.36	0.12	1.703e-30	1.799e-29		AO090038000320	6	2820259	2821084	825	1553.29	-2.4	0.21	4.412e-32	4.655e-31
AO090005001343	1	2834613	2837040	2427	500.77	-2.24	0.2	1.742e-30	1.838e-29		AO090001000446	2	1130714	1132236	1522	1521.33	1.76	0.15	4.577e-32	4.824e-31
AO090138000041	6	4106969	4108681	1712	214.25	-3.68	0.33	1.785e-30	1.88e-29		AO090011000408	7	1044545	1045095	550	385.32	9.19	0.81	4.594e-32	4.838e-31
AO090701000284	5	1595161	1596522	1361	6209.27	-1.08	0.1	1.914e-30	2.014e-29		AO090009000609	1	1627337	1628556	1219	2582.41	1.85	0.16	4.733e-32	4.979e-31
AO090038000331	6	2788773	2792857	4084	834.87	-2.31	0.2	1.956e-30	2.057e-29		AO090023000955	3	2523444	2524969	1525	899.38	2.42	0.21	4.924e-32	5.176e-31
AO090011000264	7	673411	677397	3986	880.1	-3.4	0.3	1.993e-30	2.092e-29		AO090011000043	7	121831	142723	20892	4673.63	-2.27	0.2	5.539e-32	5.817e-31
AO090005001479	1	2517196	2517955	759	403.59	-1.74	0.15	2.141e-30	2.245e-29		AO090012000681	4	1728786	1730607	1821	113.93	-4.57	0.4	6.348e-32	6.659e-31
AO090012000272	4	672909	674164	1255	3392.89	1.17	0.1	2.293e-30	2.402e-29		AO090003000367	2	3077890	3078342	452	730.2	1.57	0.13	6.763e-32	7.088e-31
AO090103000211	8	745835	747553	1718	669.15	-1.68	0.15	2.683e-30	2.808e-29		AO090005001311	1	2918194	2919354	1160	1880.72	1.96	0.17	6.967e-32	7.295e-31
AO090102000316	4	3686844	3687996	1152	580.05	2	0.18	2.712e-30	2.836e-29		AO090026000157	3	4678924	4681200	2276	1402.34	-2.38	0.21	7.123e-32	7.451e-31
AO090003000831	2	4331383	4332925	1542	7372.14	2.24	0.2	2.862e-30	2.99e-29		AO090003000917	2	4582471	4583142	671	35356.8	2.38	0.21	7.869e-32	8.224e-31
AO090026000066	3	4951340	4954462	3122	1154.8	1.14	0.1	2.91e-30	3.035e-29		AO090103000390	8	271040	272481	1441	646.93	-1.98	0.17	8.673e-32	9.056e-31
AO090026000065	3	4954870	4955318	448	58.59	3.44	0.31	3.054e-30	3.182e-29		AO090005001181	1	3297085	3298211	1126	2532.91	-4.4	0.38	9.409e-32	9.815e-31
AO090009000417	1	1099008	1100658	1650	1499.39	-2.65	0.24	3.161e-30	3.291e-29		AO090010000322	8	2483055	2484259	1204	156.53	-5.62	0.49	9.936e-32	1.036e-30
AO090003001501	2	6113124	6114564	1440	662.64	-3.59	0.32	3.356e-30	3.491e-29		AO090701000361	5	1381820	1382939	1119	150.53	-3.42	0.3	1.305e-31	1.359e-30
AO090005000909	1	3990195	3992690	2495	97.58	-4.4	0.4	3.553e-30	3.692e-29		AO090138000114	6	3953871	3956168	2297	506.54	-3.58	0.31	1.311e-31	1.364e-30
AO090012000409	4	1003234	1004395	1161	1747.07	1.26	0.11	3.557e-30	3.693e-29		AO090023000315	3	797648	798857	1209	497.75	1.94	0.17	1.407e-31	1.462e-30
AO090038000529	6	2251044	2254784	3740	2158.43	-1.06	0.09	3.847e-30	3.991e-29		AO090038000524	6	2263270	2266092	2822	755.61	1.55	0.13	1.432e-31	1.487e-30
AO090010000117	8	3095746	3096692	946	1296.51	-1.37	0.12	3.913e-30	4.055e-29		AO090701000603	5	766862	767567	705	356.89	-2.81	0.25	1.537e-31	1.594e-30
AO090003000770	2	4164628	4167038	2410	7083.7	2.74	0.24	4.04e-30	4.183e-29		AO090010000363	8	2387961	2388837	876	637.64	4.66	0.41	1.628e-31	1.687e-30
AO090009000413	1	1087207	1089275	2068	1422.89	1.32	0.12	4.048e-30	4.184e-29		AO090001000284	2	707481	708600	1119	341.88	-4.77	0.42	1.688e-31	1.747e-30
AO090009000590	1	1564107	1566746	2639	10955.3	1.25	0.11	4.204e-30	4.342e-29		AO090003001362	2	5785676	5786707	1031	375.07	-3.77	0.33	1.696e-31	1.754e-30
AO090701000538	5	930833	931710	877	3192.46	-3.2	0.29	4.24e-30	4.37e-29		AO090011000587	7	1488405	1490227	1822	1670.09	2.62	0.23	1.969e-31	2.034e-30
AO090026000660	3	3299181	3303316	4135	2701.85	1.12	0.1	4.474e-30	4.603e-29		AO090001000364	2	919782	920822	1040	3162.58	1.33	0.12	1.985e-31	2.049e-30
AO090023000219	3	549875	551359	1484	631.35	1.13	0.1	4.547e-30	4.675e-29		AO090026000253	3	4406568	4408137	1569	233.92	-3.07	0.27	2.084e-31	2.15e-30
AO090003000289	2	2871824	2874864	3040	1349.01	2.35	0.21	4.565e-30	4.689e-29		AO090005001286	1	2985919	2987696	1777	1247.67	2.06	0.18	2.123e-31	2.188e-30
AO090012000116	4	286591	287471	880	712.65	-2.78	0.25	4.587e-30	4.707e-29		AO090023000640	3	1679654	1680518	864	1795.98	1.81	0.16	2.632e-31	2.71e-30
AO090120000034	5	2768537	2769227	690	3793.16	1.2	0.11	4.608e-30	4.725e-29		AO090009000164	1	435447	437318	1871	113.5	-5.05	0.44	2.688e-31	2.765e-30
AO090003001444	2	5972838	5973648	810	117.88	-2.92	0.26	5.019e-30	5.142e-29		AO090011000291	7	742810	743289	479	786.23	1.68	0.15	2.859e-31	2.938e-30
AO090001000215	2	503316	505102	1786	244.24	-1.71	0.15	5.13e-30	5.251e-29		AO090003000729	2	4056034	4057658	1624	11007.2	2.16	0.19	3.221e-31	3.308e-30
AO090003001365	2	5792072	5793721	1649	2258.97	-3.17	0.28	5.912e-30	6.045e-29		AO090023000362	3	921453	923874	2421	757.68	-5.97	0.53	3.5e-31	3.59e-30
AO090005001429	1	2636013	2637455	1442	8127.16	2.04	0.18	6.594e-30	6.737e-29		AO090026000165	3	4652009	4653391	1382	925.55	1.87	0.16	3.609e-31	3.698e-30
AO090701000738	5	414945	415644	699	5340.79	2.82	0.25	7.753e-30	7.914e-29		AO090038000113	6	3379941	3380443	502	579.57	-5.54	0.49	3.922e-31	4.016e-30
AO090012000988	4	2560207	2566780	6573	53801.4	-2.59	0.23	8.354e-30	8.521e-29		AO090038000620	6	1978278	1979370	1092	1526.93	-2.47	0.22	3.934e-31	4.025e-30
AO090020000332	6	995524	996761	1237	4038.14	-1.32	0.12	8.404e-30	8.564e-29		AO090038000267	6	2966180	2970032	3852	986.56	-3.37	0.3	4.494e-31	4.593e-30
AO090103000328	8	437003	438270	1267	275.73	-2.57	0.23	8.522e-30	8.677e-29		AO090001000524	2	1365867	1366753	886	5411.61	1.62	0.14	4.522e-31	4.617e-30
AO090005000337	1	5568360	5570541	2181	249.43	-2.85	0.26	9.027e-30	9.182e-29		AO090012000486	4	1214407	1219649	5242	3851.4	1.82	0.16	4.955e-31	5.055e-30
AO090020000614	6	255080	256331	1251	431.52	11.56	1.06	9.036e-30	9.184e-29		AO090023000980	3	2589190	2591487	2297	14454.3	-1.86	0.16	4.999e-31	5.095e-30
AO090011000297	7	753875	754691	816	157.78	-3.93	0.36	9.211e-30	9.353e-29		AO090005000382	1	5450317	5452656	2339	150.8	-6.06	0.53	5.247e-31	5.343e-30
AO090005000810	1	4246800	4248475	1675	2449.87	2.12	0.19	1.04e-29	1.055e-28		AO090166000075	4	4771448	4772705	1257	415.6	-3.1	0.27	5.363e-31	5.456e-30
AO090026000217	3	4503873	4505862	1989	279.31	-3.47	0.31	1.074e-29	1.088e-28		AO090038000540	6	2210505	2212689	2184	10819.1	-3.11	0.27	5.663e-31	5.756e-30
AO090023000348	3	886008	887791	1783	104.14	-3.06	0.28	1.09e-29	1.104e-28		AO090005000878	1	4085090	4086168	1078	1113.19	2.16	0.19	5.835e-31	5.926e-30
AO090124000083	5	2476608	2482302	5694	28514	1.42	0.13	1.147e-29	1.16e-28		AO090124000082	5	2482682	2484782	2100	1889.83	1.17	0.1	6.186e-31	6.276e-30
AO090120000196	5	3178957	3181001	2044	145.67	-2.4	0.22	1.156e-29	1.168e-28		AO090003001306	2	5632544	5634257	1713	8017.59	-2.17	0.19	6.303e-31	6.389e-30
AO090701000295	5	1567139	1568090	951	372.39	2.22	0.2	1.229e-29	1.24e-28		AO090003000552	2	3563268	3566352	3084	1064.41	1.72	0.15	6.632e-31	6.716e-30
AO090023000095	3	240360	241809	1449	257.14	-3.05	0.28	1.266e-29	1.277e-28		AO090005000816	1	4233497	4234795	1298	567.45	2.77	0.24	6.9e-31	6.975e-30
AO090701000820	5	221852	222668	816	332.18	1.47	0.13	1.396e-29	1.406e-28		AO090009000236	1	628815	630564	1749	20856.7	-3.93	0.35	6.897e-31	6.975e-30
AO090001000386	2	971339	973838	2499	1406.06	-1.19	0.11	1.473e-29	1.482e-28		AO090003000618	2	3754628	3755632	1004	25023.5	2.36	0.21	7.016e-31	7.085e-30
AO090003000252	2	2762920	2763793	873	1186.8	1.77	0.16	1.497e-29	1.505e-28		AO090026000089	3	4862254	4863985	1731	3614.9	-2.12	0.19	7.202e-31	7.267e-30
AO090102000145	4	4165826	4167368	1542	2676.74	-1.21	0.11	1.521e-29	1.526e-28		AO090120000478	5	3968100	3969213	1113	3072.64	2.04	0.18	7.222e-31	7.28e-30
AO090011000937	7	2458621	2459923	1302	2377.03	-1.98	0.18	1.568e-29	1.571e-28		AO090010000570	8	1887796	1888936	1140	204.16	-3.08	0.27	7.308e-31	7.36e-30
AO090011000473	7	1188891	1190281	1390	547.74	-1.69	0.15	1.605e-29	1.607e-28		AO090012000928	4	2393913	2395406	1493	1984.39	1.37	0.12	8.04e-31	8.091e-30
AO090026000258	3	4385202	4386275	1073	888.47	-1.23	0.11	1.61e-29	1.611e-28		AO090103000240	8	653248	654979	1731	186.64	-6.88	0.61	8.233e-31	8.277e-30
AO090012000463	4	1155611	1156194	583	842.1	2.14	0.19	1.686e-29	1.685e-28		AO090005000536	1	5021570	5024414	2844	17110.4	-2.95	0.26	8.355e-31	8.392e-30
AO090005001060	1	3616873	3617726	853	1968.99	1.7	0.15	1.723e-29	1.721e-28		AO090001000536	2	1399724	1401134	1410	185.64	-3.55	0.31	8.612e-31	8.643e-30
AO090009000595	1	1583046	1585023	1977	4769.71	1.25	0.11	1.724e-29	1.721e-28		AO090023000453	3	1160384	1162177	1793	181.1	-5.82	0.52	1.126e-30	1.129e-29
AO090166000044	4	4665289	4667127	1838	208.14	-1.77	0.16	1.869e-29	1.864e-28		AO090012000581	4	1476617	1478942	2325	6917.23	1.38	0.12	1.165e-30	1.167e-29
AO090005000038	1	6336496	6337842	1346	2064.4	-3.49	0.32	2.125e-29	2.116e-28		AO090038000421	6	2544204	2545485	1281	1318.68	-1.54	0.14	1.169e-30	1.17e-29
AO090012000675	4	1714651	1715971	1320	20373.5	2.95	0.27	2.139e-29	2.129e-28		AO090010000756	8	1426298	1431034	4736	714.28	-2.15	0.19	1.458e-30	1.458e-29
AO090701000066	5	2176463	2179030	2567	8231.69	1.35	0.12	2.301e-29	2.288e-28		AO090003000896	2	4519229	4521941	2712	10816.2	-1.32	0.12	1.571e-30	1.569e-29
AO090020000236	6	1226163	1227759	1596	125.64	-3.71	0.34	2.313e-29	2.298e-28		AO090102000226	4	3938828	3939719	891	23245.3	2.5	0.22	1.659e-30	1.655e-29
AO090012000622	4	1590535	1590956	421	1332.22	-2.1	0.19	2.405e-29	2.387e-28		AO090009000522	1	1391435	1393186	1751	699.66	2.25	0.2	1.728e-30	1.723e-29
AO090102000047	4	4426372	4428829	2457	106.08	-3.19	0.29	2.461e-29	2.441e-28		AO090102000283	4	3754639	3755657	1018	1277.02	-2.29	0.2	1.758e-30	1.751e-29
AO090701000046	5	2229104	2230385	1281	357541	-1.57	0.14	2.467e-29	2.445e-28		AO090103000107	8	994063	995094	1031	552.79	-3.23	0.29	1.988e-30	1.979e-29
AO090003001438	2	5960780	5961560	780	283.29	-3.11	0.28	2.566e-29	2.541e-28		AO090026000421	3	3934312	3935234	922	1597.32	1.96	0.17	2.113e-30	2.102e-29
AO090011000202	7	524616	525867	1251	134844	1.99	0.18	2.617e-29	2.59e-28		AO090009000211	1	566449	568389	1940	5407.43	-2.44	0.22	2.159e-30	2.145e-29
AO090701000363	5	1377011	1377797	786	93.37	-4.11	0.38	2.638e-29	2.608e-28		AO090001000489	2	1236101	1237504	1403	432.56	2.43	0.22	2.242e-30	2.225e-29
AO090005001301	1	2934458	2935121	663	1306.94	1.53	0.14	2.911e-29	2.875e-28		AO090120000132	5	3010794	3011369	575	1908.36	2.23	0.2	2.349e-30	2.33e-29
AO090701000347	5	1413385	1415021	1636	493.28	-3.48	0.32	2.953e-29	2.914e-28		AO090001000063	2	139177	140337	1160	132.04	-5.61	0.5	2.475e-30	2.452e-29
AO090102000016	4	4499714	4500878	1164	1758.5	1.27	0.12	3.333e-29	3.286e-28		AO090005000260	1	5743560	5744983	1423	551.37	2.03	0.18	2.489e-30	2.464e-29
AO090003000183	2	2587897	2588950	1053	2259.18	1.22	0.11	3.341e-29	3.292e-28		AO090003001260	2	5519587	5521145	1558	744.63	-4.08	0.36	2.946e-30	2.914e-29
AO090005001512	1	2409411	2410243	832	420.21	1.39	0.13	3.46e-29	3.406e-28		AO090005001454	1	2584046	2585107	1061	539.73	-2.06	0.18	3.056e-30	3.02e-29
AO090138000105	6	3972864	3975016	2152	384.24	1.96	0.18	3.95e-29	3.885e-28		AO090011000638	7	1645255	1647468	2213	19066.1	2.99	0.27	3.254e-30	3.213e-29
AO090103000333	8	424051	425240	1189	2102.43	1.08	0.1	3.983e-29	3.914e-28		AO090103000301	8	499727	501463	1736	1297.51	2.83	0.25	3.497e-30	3.45e-29
AO090011000307	7	779477	780422	945	214.07	-1.96	0.18	4.256e-29	4.179e-28		AO090005001302	1	2931666	2933258	1592	22188.5	2.4	0.21	3.578e-30	3.527e-29
AO090023000109	3	278912	279556	644	341.29	-1.56	0.14	4.28e-29	4.199e-28		AO090023000429	3	1095582	1096233	651	298.03	2.99	0.27	3.698e-30	3.642e-29
AO090026000628	3	3380685	3382167	1482	695.96	1.22	0.11	4.63e-29	4.538e-28		AO090026000458	3	3833499	3835052	1553	52066.4	2.84	0.25	3.841e-30	3.78e-29
AO090023000411	3	1053861	1055321	1460	5129.74	-2.77	0.25	5.347e-29	5.237e-28		AO090038000592	6	2056536	2057309	773	20756.5	2.11	0.19	3.942e-30	3.876e-29
AO090003000247	2	2747302	2750084	2782	1974.62	1.68	0.15	5.977e-29	5.848e-28		AO090026000812	3	2904455	2906942	2487	78.72	5.61	0.5	4.037e-30	3.965e-29
AO090102000406	4	3415339	3416148	809	636.01	-2.39	0.22	6.304e-29	6.162e-28		AO090012000490	4	1226771	1227187	416	332.81	-3.22	0.29	4.465e-30	4.382e-29
AO090701000798	5	273785	277097	3312	1176.48	-1	0.09	6.308e-29	6.162e-28		AO090038000110	6	3387695	3388348	653	34694.7	2.12	0.19	4.552e-30	4.463e-29
AO090023000682	3	1790838	1792963	2125	5148.34	1.55	0.14	6.354e-29	6.202e-28		AO090026000676	3	3258037	3259771	1734	723.91	1.66	0.15	4.673e-30	4.578e-29
AO090003000216	2	2660904	2662242	1338	903.46	-3.21	0.29	6.692e-29	6.527e-28		AO090011000424	7	1080594	1082220	1626	548.95	1.85	0.16	4.809e-30	4.707e-29
AO090011000296	7	751640	753784	2144	315.23	-3.03	0.28	7.47e-29	7.279e-28		AO090003000895	2	4516988	4517933	945	35311.5	2.52	0.22	4.861e-30	4.754e-29
AO090010000126	8	3069974	3071674	1700	16360.5	2.18	0.2	7.825e-29	7.618e-28		AO090005000432	1	5314986	5317089	2103	2178.8	1.69	0.15	4.902e-30	4.789e-29
AO090009000304	1	809737	810952	1215	2538.59	1.67	0.15	8.281e-29	8.056e-28		AO090011000338	7	862452	864062	1610	31718.5	2.7	0.24	4.954e-30	4.836e-29
AO090003000373	2	3092534	3093911	1377	2653.95	1.14	0.1	8.45e-29	8.213e-28		AO090005000141	1	6063627	6066924	3297	987.63	2.32	0.21	5.221e-30	5.092e-29
AO090026000137	3	4732669	4733354	685	727.63	-2.07	0.19	9.409e-29	9.13e-28		AO090005001065	1	3597465	3597865	400	7176.57	-2.65	0.24	5.288e-30	5.152e-29
AO090010000623	8	1759262	1761736	2474	2579.31	1.16	0.11	1.089e-28	1.056e-27		AO090206000019	7	2633463	2635512	2049	5087.88	-1.52	0.13	5.81e-30	5.656e-29
AO090005000218	1	5859697	5861173	1476	334.49	1.87	0.17	1.204e-28	1.166e-27		AO090010000053	8	3263367	3267069	3702	186.33	-4.43	0.4	6.24e-30	6.07e-29
AO090003000083	2	2311943	2314719	2776	1489.82	-2.26	0.21	1.315e-28	1.272e-27		AO090001000154	2	347039	348681	1642	258.21	2.44	0.22	6.346e-30	6.167e-29
AO090023000032	3	87402	87874	472	279.27	1.44	0.13	1.442e-28	1.393e-27		AO090012000629	4	1607996	1609570	1574	15241.7	1.47	0.13	6.364e-30	6.179e-29
AO090005001078	1	3568106	3569314	1208	1795.65	-1.06	0.1	1.449e-28	1.399e-27		AO090113000164	5	4429590	4431055	1465	205.42	-2.89	0.26	6.517e-30	6.322e-29
AO090026000221	3	4497212	4498045	833	121.55	2.77	0.25	1.471e-28	1.419e-27		AO090009000506	1	1345252	1346672	1420	219.04	2.24	0.2	6.935e-30	6.722e-29
AO090038000421	6	2544204	2545485	1281	465.2	-2.2	0.2	1.652e-28	1.593e-27		AO090120000217	5	3233521	3236231	2710	2691.77	1.94	0.17	7.134e-30	6.909e-29
AO090701000743	5	397780	399459	1679	131.57	2.68	0.25	1.657e-28	1.596e-27		AO090005000021	1	6366423	6368229	1806	105.29	-4.96	0.44	7.165e-30	6.933e-29
AO090005000629	1	4772632	4774093	1461	8283.58	1.58	0.15	1.659e-28	1.597e-27		AO090005000082	1	6218066	6218920	854	3124.25	-3.04	0.27	7.669e-30	7.412e-29
AO090102000517	4	3117707	3118785	1078	6907.92	1.14	0.1	1.668e-28	1.604e-27		AO090701000318	5	1504420	1506509	2089	7141.39	2.62	0.24	7.673e-30	7.412e-29
AO090020000302	6	1069253	1071578	2325	2608.52	-1.08	0.1	1.694e-28	1.627e-27		AO090003000890	2	4504268	4505213	945	1725.1	-2.35	0.21	7.827e-30	7.554e-29
AO090206000049	7	2702645	2705591	2946	2296.95	-1.19	0.11	1.72e-28	1.651e-27		AO090120000326	5	3557635	3560215	2580	1974.57	1.64	0.15	8.786e-30	8.472e-29
AO090023000478	3	1222734	1226277	3543	3958.11	1.82	0.17	1.795e-28	1.722e-27		AO090038000383	6	2670913	2673073	2160	1330.34	1.69	0.15	8.984e-30	8.655e-29
AO090005001506	1	2436281	2437051	770	843.14	-1.96	0.18	1.878e-28	1.8e-27		AO090701000041	5	2246278	2248606	2328	5046.9	1.71	0.15	9.28e-30	8.933e-29
AO090001000009	2	16083	25587	9504	1011.01	-1.38	0.13	1.882e-28	1.802e-27		AO090012000296	4	732190	734008	1818	387.82	-6.49	0.59	9.359e-30	9.001e-29
AO090001000146	2	326184	327831	1647	6683.21	-3.12	0.29	1.916e-28	1.833e-27		AO090003001087	2	5041737	5042966	1229	5467.38	2.72	0.24	9.679e-30	9.3e-29
AO090010000579	8	1867032	1868416	1384	94145.5	-1.23	0.11	1.939e-28	1.854e-27		AO090701000705	5	510020	510812	792	439.89	2.29	0.21	9.751e-30	9.361e-29
AO090102000595	4	2915655	2916417	762	2409.51	1.14	0.1	1.948e-28	1.861e-27		AO090012000934	4	2406405	2407515	1110	919.38	1.8	0.16	9.77e-30	9.372e-29
AO090102000469	4	3248184	3249435	1251	1049.44	1.95	0.18	2.022e-28	1.93e-27		AO090020000093	6	1570854	1571369	515	997.78	-2.06	0.18	1.094e-29	1.048e-28
AO090701000319	5	1501899	1504419	2520	2155.94	-1.01	0.09	2.029e-28	1.934e-27		AO090020000326	6	1011738	1013668	1930	3857.88	-1.27	0.11	1.174e-29	1.124e-28
AO090701000405	5	1273320	1274184	864	279.29	-2.2	0.2	2.053e-28	1.956e-27		AO090003000664	2	3880508	3882248	1740	1924.09	1.65	0.15	1.393e-29	1.333e-28
AO090010000469	8	2138793	2139620	827	20053.1	2.65	0.24	2.117e-28	2.016e-27		AO090005000761	1	4405163	4405772	609	28343.1	2.39	0.22	1.415e-29	1.353e-28
AO090003000873	2	4462591	4463733	1142	10968.1	1.01	0.09	2.256e-28	2.146e-27		AO090005001476	1	2522428	2523009	581	162.85	2.42	0.22	1.418e-29	1.354e-28
AO090138000036	6	4121377	4122674	1297	99.98	-3.61	0.34	2.313e-28	2.198e-27		AO090103000098	8	1010158	1010950	792	1554.96	-4.15	0.38	1.473e-29	1.406e-28
AO090003000396	2	3146684	3147242	558	189.66	2.21	0.2	2.543e-28	2.413e-27		AO090005000341	1	5561425	5562476	1051	123.86	-5.17	0.47	1.52e-29	1.449e-28
AO090023000325	3	830364	831468	1104	110.57	2.48	0.23	2.542e-28	2.413e-27		AO090023000139	3	352368	352836	468	165.06	3.67	0.33	1.525e-29	1.453e-28
AO090003000244	2	2741095	2742116	1021	1026.49	-1.13	0.1	2.625e-28	2.489e-27		AO090003000420	2	3201508	3203575	2067	307.66	-2.68	0.24	1.564e-29	1.488e-28
AO090003001452	2	5990287	5991269	982	143.71	-2.19	0.2	2.645e-28	2.506e-27		AO090010000223	8	2804386	2805402	1016	27559.8	2.46	0.22	1.58e-29	1.502e-28
AO090701000589	5	801560	804589	3029	10679.9	-1	0.09	2.669e-28	2.526e-27		AO090020000298	6	1080718	1081446	728	25442.4	2.65	0.24	1.639e-29	1.557e-28
AO090005000900	1	4015872	4016391	519	2353.57	1.38	0.13	3.09e-28	2.92e-27		AO090003000741	2	4079169	4081460	2291	4843.86	-1.59	0.14	1.7e-29	1.614e-28
AO090012000234	4	577384	578006	622	3027.61	-2.73	0.25	3.137e-28	2.962e-27		AO090011000490	7	1222351	1222874	523	16269.5	2.85	0.26	1.78e-29	1.688e-28
AO090012000044	4	93633	94746	1113	209.8	-3.57	0.33	3.284e-28	3.098e-27		AO090701000090	5	2117632	2118627	995	2717.23	1.55	0.14	1.797e-29	1.703e-28
AO090166000043	4	4661196	4663733	2537	230.02	-1.65	0.15	3.394e-28	3.199e-27		AO090701000557	5	879921	881124	1203	16684	3.46	0.31	2.046e-29	1.937e-28
AO090124000056	5	2547392	2549830	2438	73.38	3.04	0.28	3.857e-28	3.63e-27		AO090012000814	4	2091965	2092938	973	1038.04	1.8	0.16	2.058e-29	1.947e-28
AO090113000079	5	4244266	4245009	743	2510.64	1.42	0.13	3.913e-28	3.68e-27		AO090023000711	3	1875192	1877075	1883	5477.31	-3.05	0.28	2.098e-29	1.984e-28
AO090138000023	6	4150614	4151754	1140	83.32	3.05	0.28	3.949e-28	3.711e-27		AO090120000237	5	3303778	3304222	444	293.66	-2.37	0.21	2.238e-29	2.114e-28
AO090009000346	1	916978	917680	702	13910.9	-1.83	0.17	4.101e-28	3.85e-27		AO090003001036	2	4885880	4887257	1377	33150	-3.79	0.34	2.365e-29	2.232e-28
AO090138000157	6	3819955	3820823	868	4796.66	2.14	0.2	4.182e-28	3.924e-27		AO090005001132	1	3420734	3421401	667	17595.6	2.83	0.26	2.397e-29	2.258e-28
AO090009000036	1	103101	103689	588	173.15	-1.82	0.17	4.611e-28	4.322e-27		AO090206000002	7	2589650	2591756	2106	4400.22	2.42	0.22	2.397e-29	2.258e-28
AO090701000830	5	191746	193429	1683	2002.71	1.44	0.13	5.012e-28	4.694e-27		AO090701000595	5	787251	789993	2742	1192.75	-2.19	0.2	2.566e-29	2.415e-28
AO090023000807	3	2100096	2101240	1144	2702.5	1.51	0.14	5.448e-28	5.098e-27		AO090001000196	2	451430	453493	2063	1059.97	2.01	0.18	2.637e-29	2.48e-28
AO090010000563	8	1904165	1904978	813	448.39	-1.63	0.15	5.72e-28	5.349e-27		AO090020000297	6	1081797	1082670	873	26967.2	2.62	0.24	2.707e-29	2.544e-28
AO090010000082	8	3198343	3199859	1516	688.21	-2.68	0.25	5.87e-28	5.48e-27		AO090001000570	2	1498522	1499806	1284	543.1	2.01	0.18	2.897e-29	2.721e-28
AO090011000222	7	568571	570734	2163	649.79	1.68	0.16	6.144e-28	5.731e-27		AO090026000091	3	4857798	4859309	1511	572.67	-4.22	0.38	2.948e-29	2.766e-28
AO090102000580	4	2961267	2962204	937	1309.08	1.6	0.15	6.856e-28	6.39e-27		AO090003001010	2	4830266	4831331	1065	1480.85	2.22	0.2	3.093e-29	2.899e-28
AO090001000712	2	1888437	1888909	472	8483.61	1.05	0.1	7.171e-28	6.678e-27		AO090003000247	2	2747302	2750084	2782	5537.51	-4.26	0.39	3.117e-29	2.919e-28
AO090012000280	4	694147	695830	1683	573.82	-1.54	0.14	7.355e-28	6.844e-27		AO090001000633	2	1658427	1661420	2993	6730.16	-2.12	0.19	3.132e-29	2.931e-28
AO090012000133	4	324967	325727	760	55.92	4.58	0.44	7.46e-28	6.936e-27		AO090005001059	1	3618096	3618940	844	27341.1	1.75	0.16	3.168e-29	2.963e-28
AO090003001146	2	5226095	5226872	777	4617.88	1.74	0.16	7.625e-28	7.084e-27		AO090102000005	4	4523173	4523898	725	376.85	-3.06	0.28	3.238e-29	3.025e-28
AO090010000221	8	2810194	2811378	1184	4500.61	1.58	0.15	7.782e-28	7.224e-27		AO090005001138	1	3405710	3406637	927	281.57	-3.05	0.28	3.247e-29	3.031e-28
AO090003001005	2	4818448	4820116	1668	45.87	4.38	0.42	7.856e-28	7.287e-27		AO090005001280	1	3022637	3023359	722	24836.4	7.32	0.68	3.459e-29	3.226e-28
AO090206000024	7	2644654	2646256	1602	851.36	1.69	0.16	8.077e-28	7.486e-27		AO090003000997	2	4799970	4801224	1254	638.56	1.65	0.15	3.716e-29	3.463e-28
AO090023000414	3	1058896	1060202	1306	44.63	4.36	0.42	8.651e-28	8.005e-27		AO090005000824	1	4213710	4216711	3001	1243.36	1.43	0.13	4.087e-29	3.805e-28
AO090103000438	8	162613	163315	702	162.44	-2.35	0.22	8.661e-28	8.008e-27		AO090020000047	6	1687344	1688487	1143	1015.48	1.56	0.14	4.312e-29	4.012e-28
AO090005000808	1	4250500	4251070	570	980.23	1.44	0.13	8.898e-28	8.214e-27		AO090701000014	5	2320431	2321277	846	18873.9	2.27	0.21	4.335e-29	4.03e-28
AO090102000599	4	2902687	2904965	2278	9706.29	-1.58	0.15	8.952e-28	8.257e-27		AO090023000068	3	182162	182651	489	343.65	-2.81	0.26	4.536e-29	4.213e-28
AO090012000943	4	2434421	2435574	1153	356.02	-1.32	0.12	1.004e-27	9.255e-27		AO090010000736	8	1487447	1489124	1677	491.27	-5.91	0.54	4.709e-29	4.37e-28
AO090003000888	2	4499530	4500378	848	19180	-2.14	0.2	1.036e-27	9.537e-27		AO090023000854	3	2231041	2232064	1023	9979.39	1.48	0.13	4.936e-29	4.577e-28
AO090138000052	6	4087519	4087849	330	511.76	-1.57	0.15	1.093e-27	1.005e-26		AO090010000010	8	3370542	3374031	3489	791.65	-2.59	0.24	4.974e-29	4.608e-28
AO090009000492	1	1309754	1311808	2054	16789.3	1.51	0.14	1.096e-27	1.007e-26		AO090003000872	2	4460751	4461720	969	29367.7	2.49	0.23	5.493e-29	5.084e-28
AO090010000393	8	2312515	2313220	705	91.92	-3.45	0.32	1.097e-27	1.007e-26		AO090120000131	5	3009018	3009889	871	23723.2	2.16	0.2	5.565e-29	5.147e-28
AO090003001236	2	5454408	5455707	1299	529.95	-1.77	0.16	1.106e-27	1.015e-26		AO090138000035	6	4123806	4125730	1924	1504.62	-4.31	0.39	5.756e-29	5.319e-28
AO090103000047	8	1127437	1131064	3627	2054.6	-1.29	0.12	1.163e-27	1.066e-26		AO090003000910	2	4560635	4561064	429	466.33	-2.59	0.24	5.94e-29	5.485e-28
AO090012000729	4	1860804	1862100	1296	1976.43	1.44	0.13	1.249e-27	1.143e-26		AO090023000918	3	2407634	2408468	834	26904.1	2.62	0.24	6.227e-29	5.745e-28
AO090012000591	4	1502029	1503127	1098	131.45	-2.73	0.25	1.303e-27	1.191e-26		AO090026000211	3	4515943	4517053	1110	101.5	-4.04	0.37	6.691e-29	6.168e-28
AO090138000201	6	3705626	3707696	2070	229.2	-1.89	0.18	1.309e-27	1.196e-26		AO090005000692	1	4599453	4601443	1990	2060.45	-4.51	0.41	6.966e-29	6.415e-28
AO090012000303	4	754605	755573	968	8090.26	2.29	0.21	1.357e-27	1.239e-26		AO090020000116	6	1520809	1521978	1169	1668.04	1.47	0.13	7.352e-29	6.766e-28
AO090005000264	1	5732759	5733370	611	158.3	1.7	0.16	1.36e-27	1.241e-26		AO090011000411	7	1049374	1051191	1817	222.78	6.28	0.58	8.685e-29	7.986e-28
AO090026000789	3	2987724	2988411	687	1425.42	1.18	0.11	1.401e-27	1.277e-26		AO090113000065	5	4206295	4208093	1798	776.43	-2.49	0.23	9.005e-29	8.273e-28
AO090020000602	6	298708	299958	1250	2952.11	1.63	0.15	1.449e-27	1.32e-26		AO090102000330	4	3646589	3650316	3727	867.41	-1.93	0.18	9.894e-29	9.082e-28
AO090020000595	6	312133	313438	1305	336.08	-1.87	0.17	1.475e-27	1.342e-26		AO090020000118	6	1517847	1518750	903	370.71	2.74	0.25	9.97e-29	9.145e-28
AO090003001389	2	5848823	5850362	1539	2471.17	-1.47	0.14	1.584e-27	1.44e-26		AO090020000500	6	549490	551188	1698	4791.29	2.33	0.21	1.003e-28	9.196e-28
AO090701000717	5	464628	465969	1341	2667.68	-1.93	0.18	1.607e-27	1.46e-26		AO090009000591	1	1568336	1573687	5351	45457.3	-4.35	0.4	1.136e-28	1.04e-27
AO090001000573	2	1505032	1505795	763	536.7	1.67	0.16	1.614e-27	1.465e-26		AO090003001100	2	5088542	5090711	2169	425.38	-4.17	0.38	1.14e-28	1.043e-27
AO090102000283	4	3754639	3755657	1018	644.43	-3.11	0.29	1.637e-27	1.485e-26		AO090009000588	1	1558693	1560034	1341	318.65	-2.7	0.25	1.153e-28	1.054e-27
AO090012000239	4	587790	588414	624	834.31	1.64	0.15	1.68e-27	1.523e-26		AO090012000439	4	1095000	1097063	2063	295.22	-2.67	0.25	1.194e-28	1.09e-27
AO090023000609	3	1602126	1602896	770	1293.01	-2.56	0.24	1.704e-27	1.544e-26		AO090009000430	1	1129848	1130996	1148	431.88	1.81	0.17	1.219e-28	1.113e-27
AO090102000291	4	3737718	3739402	1684	5559.24	1.3	0.12	1.744e-27	1.579e-26		AO090011000874	7	2237325	2238629	1304	1581.73	2.29	0.21	1.238e-28	1.129e-27
AO090020000634	6	207126	208049	923	2689.94	1.81	0.17	1.878e-27	1.698e-26		AO090102000368	4	3531632	3532778	1146	2158.9	2.01	0.18	1.31e-28	1.194e-27
AO090023000518	3	1350474	1352066	1592	3918.34	-2.39	0.22	1.955e-27	1.765e-26		AO090103000046	8	1134419	1136377	1958	2548.09	-2.59	0.24	1.782e-28	1.623e-27
AO090701000710	5	492877	497994	5117	15646.5	1.34	0.13	1.975e-27	1.782e-26		AO090023000995	3	2630785	2633339	2554	2020.13	-1.34	0.12	1.966e-28	1.788e-27
AO090026000537	3	3607625	3609478	1853	21624.2	-1.05	0.1	1.987e-27	1.792e-26		AO090003000216	2	2660904	2662242	1338	592.14	-2.18	0.2	2.038e-28	1.852e-27
AO090020000093	6	1570854	1571369	515	251.28	-2.4	0.22	2.04e-27	1.837e-26		AO090020000671	6	123694	125553	1859	284.85	-2.14	0.2	2.06e-28	1.87e-27
AO090701000433	5	1203071	1203485	414	267.8	2.05	0.19	2.067e-27	1.859e-26		AO090701000118	5	2032807	2036522	3715	726.39	1.54	0.14	2.111e-28	1.916e-27
AO090138000135	6	3873393	3874820	1427	648.96	-1.37	0.13	2.07e-27	1.861e-26		AO090012000852	4	2195780	2196884	1104	11542.3	-1.68	0.15	2.126e-28	1.927e-27
AO090001000384	2	967336	968172	836	378.52	-1.64	0.15	2.12e-27	1.904e-26		AO090701000128	5	1999942	2000828	886	2204.99	-2.49	0.23	2.138e-28	1.937e-27
AO090038000537	6	2218419	2220353	1934	24587.8	-2.48	0.23	2.183e-27	1.958e-26		AO090023000003	3	6227	6920	693	206.69	-6.47	0.6	2.161e-28	1.956e-27
AO090701000338	5	1449400	1451127	1727	4524.54	1.65	0.15	2.216e-27	1.985e-26		AO090005000737	1	4456399	4456948	549	18735.2	2.85	0.26	2.259e-28	2.044e-27
AO090023000614	3	1611514	1613421	1907	6649.32	-3.39	0.32	2.221e-27	1.988e-26		AO090011000286	7	731976	733290	1314	529.86	-2.55	0.24	2.32e-28	2.097e-27
AO090005000784	1	4328715	4329341	626	931.84	-1.24	0.12	2.412e-27	2.156e-26		AO090701000236	5	1715754	1717170	1416	1064.03	-3.6	0.33	2.502e-28	2.26e-27
AO090012000245	4	601689	603257	1568	1982.73	1.13	0.11	2.42e-27	2.16e-26		AO090120000174	5	3122908	3123658	750	2885.01	2.54	0.23	2.513e-28	2.267e-27
AO090103000439	8	158066	161596	3530	126.98	-2.17	0.2	2.42e-27	2.16e-26		AO090038000057	6	3518469	3520127	1658	680.19	-1.77	0.16	2.617e-28	2.36e-27
AO090038000256	6	2990929	2993077	2148	419.88	-1.46	0.14	2.423e-27	2.161e-26		AO090005000543	1	5004926	5006304	1378	139.58	3.84	0.36	2.665e-28	2.401e-27
AO090005000934	1	3924369	3927855	3486	9819.39	1.38	0.13	2.458e-27	2.191e-26		AO090009000580	1	1543819	1547059	3240	125.08	-4	0.37	2.695e-28	2.426e-27
AO090138000086	6	4016436	4020967	4531	117.79	-2.73	0.26	2.518e-27	2.242e-26		AO090003000398	2	3149445	3150301	856	1879.95	1.61	0.15	2.754e-28	2.477e-27
AO090010000516	8	2015868	2018982	3114	1922.62	1.28	0.12	2.524e-27	2.246e-26		AO090701000599	5	777342	778599	1257	339	-2.07	0.19	2.904e-28	2.61e-27
AO090038000332	6	2787599	2788500	901	215.29	-2.07	0.19	2.62e-27	2.329e-26		AO090011000664	7	1715342	1716146	804	2002.59	-2.93	0.27	3.002e-28	2.695e-27
AO090012000312	4	770805	771695	890	1932.68	-3.15	0.3	2.639e-27	2.345e-26		AO090003000239	2	2728506	2729208	702	700.63	-4.52	0.42	3.147e-28	2.823e-27
AO090001000036	2	81751	82689	938	154.07	1.96	0.18	2.753e-27	2.444e-26		AO090012000464	4	1156512	1158294	1782	182.99	-2.99	0.28	3.15e-28	2.823e-27
AO090001000165	2	375721	376162	441	679.98	2.53	0.24	2.904e-27	2.574e-26		AO090009000536	1	1426069	1428096	2027	204.68	-6.78	0.63	3.273e-28	2.932e-27
AO090026000147	3	4708532	4709249	717	173.24	-3.25	0.31	2.962e-27	2.623e-26		AO090003000364	2	3069324	3071752	2428	3555.84	1.83	0.17	3.296e-28	2.95e-27
AO090009000140	1	375710	378056	2346	2699.61	2.49	0.23	2.967e-27	2.626e-26		AO090001000535	2	1398730	1399671	941	213.24	-2.85	0.26	3.591e-28	3.212e-27
AO090005000227	1	5837086	5839006	1920	4139.76	2.22	0.21	3.001e-27	2.649e-26		AO090023000373	3	952986	953937	951	122.11	4.2	0.39	3.789e-28	3.385e-27
AO090038000193	6	3171090	3172236	1146	173.38	-1.8	0.17	2.997e-27	2.649e-26		AO090005000128	1	6098053	6099615	1562	4141.62	1.7	0.16	3.879e-28	3.463e-27
AO090166000084	4	4791607	4793604	1997	12457	-2.76	0.26	3.118e-27	2.751e-26		AO090010000172	8	2952947	2956882	3935	298.18	-5.71	0.53	3.884e-28	3.465e-27
AO090020000225	6	1257461	1259017	1556	97.85	-3.84	0.37	3.142e-27	2.77e-26		AO090020000313	6	1047973	1048556	583	24635.4	2.46	0.23	4.005e-28	3.57e-27
AO090011000698	7	1794993	1796550	1557	880.37	1.14	0.11	3.513e-27	3.095e-26		AO090001000619	2	1619678	1621352	1674	2186.83	-2.67	0.25	4.018e-28	3.578e-27
AO090120000204	5	3199189	3200148	959	10262.7	-1.08	0.1	3.622e-27	3.188e-26		AO090138000095	6	3994029	3995809	1780	216.29	2.85	0.26	4.064e-28	3.617e-27
AO090026000181	3	4609219	4609957	738	1125.19	-1.03	0.1	3.85e-27	3.386e-26		AO090023000245	3	620827	622601	1774	5908.97	2.24	0.21	4.11e-28	3.654e-27
AO090012000878	4	2280483	2281779	1296	519.68	-2.22	0.21	4.164e-27	3.657e-26		AO090120000286	5	3418133	3418807	674	2413.31	-2.7	0.25	4.125e-28	3.665e-27
AO090023000951	3	2518120	2519556	1436	425.9	-1.39	0.13	4.547e-27	3.99e-26		AO090020000258	6	1175289	1176057	768	381.08	-4.78	0.44	4.335e-28	3.849e-27
AO090026000367	3	4069122	4071229	2107	361.08	-2.88	0.27	4.549e-27	3.99e-26		AO090701000276	5	1613683	1615315	1632	394.5	-2.95	0.27	4.409e-28	3.911e-27
AO090120000152	5	3058788	3061023	2235	2014.31	-1.77	0.17	4.806e-27	4.212e-26		AO090701000577	5	824574	825528	954	953.69	2.79	0.26	4.497e-28	3.986e-27
AO090012000676	4	1716330	1717059	729	6366.02	-1.72	0.16	4.822e-27	4.223e-26		AO090005001154	1	3360042	3362059	2017	407.74	2.36	0.22	4.57e-28	4.048e-27
AO090701000217	5	1764238	1765963	1725	359.75	1.24	0.12	5.025e-27	4.397e-26		AO090026000524	3	3646623	3649154	2531	11764.3	1.76	0.16	4.698e-28	4.155e-27
AO090701000239	5	1711675	1712791	1116	1216.28	1.5	0.14	5.344e-27	4.673e-26		AO090102000090	4	4312548	4313799	1251	1591.21	-2.92	0.27	4.697e-28	4.155e-27
AO090038000355	6	2737267	2737855	588	809.5	-1.06	0.1	5.552e-27	4.85e-26		AO090001000377	2	949290	951115	1825	3749.97	1.25	0.11	4.844e-28	4.28e-27
AO090009000090	1	256747	257569	822	937.14	-2.79	0.26	5.635e-27	4.919e-26		AO090038000585	6	2071275	2072811	1536	755.38	2.4	0.22	4.9e-28	4.326e-27
AO090003001108	2	5111167	5115088	3921	2607.15	2.27	0.21	5.667e-27	4.943e-26		AO090102000410	4	3404389	3406567	2178	670.49	-2.26	0.21	5.152e-28	4.545e-27
AO090023000346	3	881035	882417	1382	184.37	-2.42	0.23	6.406e-27	5.58e-26		AO090020000411	6	800277	801737	1460	5219.69	2.7	0.25	5.212e-28	4.595e-27
AO090701000440	5	1183026	1183740	714	1576.09	-2.35	0.22	6.477e-27	5.637e-26		AO090003000459	2	3315791	3316335	544	1459.21	-3.71	0.35	5.28e-28	4.65e-27
AO090701000838	5	167107	168038	931	94.64	-3	0.28	6.528e-27	5.678e-26		AO090009000315	1	839912	840554	642	12443.1	-2.53	0.24	5.764e-28	5.073e-27
AO090010000556	8	1920179	1921255	1076	93.34	-4.08	0.4	6.545e-27	5.688e-26		AO090701000528	5	959207	960413	1206	474.24	-5.09	0.47	5.991e-28	5.269e-27
AO090012000639	4	1630929	1632258	1329	1250.09	-1.01	0.1	6.691e-27	5.811e-26		AO090012000304	4	756961	759910	2949	6152.52	-3.29	0.31	7.074e-28	6.216e-27
AO090011000376	7	957160	959545	2385	17354	1.35	0.13	6.878e-27	5.969e-26		AO090102000115	4	4242128	4244183	2055	848.41	1.44	0.13	7.335e-28	6.435e-27
AO090023000312	3	790199	791593	1394	2860.55	1.4	0.13	7.205e-27	6.247e-26		AO090103000037	8	1165574	1168374	2800	997.26	1.65	0.15	7.332e-28	6.435e-27
AO090026000078	3	4914175	4916240	2065	2036.98	-3.04	0.29	7.488e-27	6.488e-26		AO090005000405	1	5394078	5394758	680	1425.03	2.19	0.2	7.564e-28	6.63e-27
AO090003000748	2	4102044	4103047	1003	3691.95	1.36	0.13	7.508e-27	6.501e-26		AO090026000395	3	3997487	4001863	4376	4946.05	-1.67	0.15	7.66e-28	6.709e-27
AO090001000200	2	461689	463782	2093	126.46	-2.2	0.21	8.051e-27	6.966e-26		AO090701000066	5	2176463	2179030	2567	4714.61	1.5	0.14	7.956e-28	6.963e-27
AO090010000652	8	1686867	1688384	1517	862.29	1.09	0.1	8.073e-27	6.974e-26		AO090003001525	2	6179372	6181242	1870	214.57	-2.82	0.26	8.365e-28	7.315e-27
AO090001000187	2	426597	428929	2332	446.07	-1.83	0.17	8.17e-27	7.053e-26		AO090020000130	6	1487621	1488338	717	291.89	-1.99	0.18	8.699e-28	7.602e-27
AO090102000471	4	3245224	3245857	633	619.62	-1.94	0.18	8.232e-27	7.101e-26		AO090010000469	8	2138793	2139620	827	5183.67	4.14	0.39	9.064e-28	7.914e-27
AO090701000367	5	1365960	1366863	903	112.34	-2.49	0.24	8.377e-27	7.221e-26		AO090001000660	2	1739003	1740109	1106	1665.16	1.84	0.17	9.202e-28	8.029e-27
AO090011000723	7	1850704	1852307	1603	168.15	2.54	0.24	8.755e-27	7.541e-26		AO090005000882	1	4074610	4076525	1915	3835.15	-1.35	0.12	9.299e-28	8.107e-27
AO090701000430	5	1207582	1208503	921	80.66	-4.22	0.41	9.012e-27	7.751e-26		AO090012000929	4	2395985	2396599	614	32995.6	2.24	0.21	9.323e-28	8.121e-27
AO090003000357	2	3052342	3054848	2506	721.16	-1.58	0.15	9.081e-27	7.804e-26		AO090005001305	1	2925951	2926956	1005	3826.78	1.19	0.11	9.457e-28	8.232e-27
AO090011000163	7	433703	435180	1477	519.01	-1.47	0.14	9.144e-27	7.853e-26		AO090005001391	1	2733895	2734537	642	6895.05	1.16	0.11	9.6e-28	8.349e-27
AO090102000005	4	4523173	4523898	725	226.6	1.66	0.16	9.187e-27	7.883e-26		AO090103000506	8	18105	19897	1792	123.96	-5.93	0.56	1.012e-27	8.799e-27
AO090012000130	4	313242	314739	1497	2822.07	-3.2	0.31	1.036e-26	8.879e-26		AO090005000342	1	5558610	5560543	1933	143.74	-5.73	0.54	1.018e-27	8.842e-27
AO090010000659	8	1671850	1672845	995	838.12	-1.23	0.12	1.039e-26	8.894e-26		AO090103000284	8	540155	541512	1357	120.1	-5.14	0.48	1.024e-27	8.887e-27
AO090005000122	1	6114680	6116107	1427	451.29	-1.77	0.17	1.048e-26	8.963e-26		AO090026000356	3	4103065	4104819	1754	1101.69	2.12	0.2	1.03e-27	8.931e-27
AO090020000635	6	205296	206516	1220	3985.65	-1.1	0.1	1.15e-26	9.836e-26		AO090023000763	3	1996327	1998186	1859	2375.04	1.1	0.1	1.099e-27	9.524e-27
AO090010000353	8	2412485	2413146	661	393.19	-1.14	0.11	1.169e-26	9.988e-26		AO090011000326	7	823259	826191	2932	15725	-2.25	0.21	1.123e-27	9.725e-27
AO090012000492	4	1228580	1230224	1644	1386.17	1.19	0.11	1.211e-26	1.033e-25		AO090701000292	5	1575797	1576890	1093	819	2.61	0.24	1.13e-27	9.774e-27
AO090138000025	6	4144957	4145365	408	464.01	3.02	0.29	1.234e-26	1.052e-25		AO090102000358	4	3555628	3556739	1111	5356.66	1.36	0.13	1.253e-27	1.083e-26
AO090701000076	5	2153702	2154510	808	891.46	-1.78	0.17	1.263e-26	1.076e-25		AO090026000088	3	4864060	4865917	1857	3528.65	-1.82	0.17	1.391e-27	1.202e-26
AO090012000845	4	2177264	2178215	951	382.02	-1.69	0.16	1.265e-26	1.077e-25		AO090011000046	7	152333	159735	7402	78572.1	3.45	0.32	1.401e-27	1.209e-26
AO090003000632	2	3798995	3799903	908	3857.24	1.26	0.12	1.274e-26	1.083e-25		AO090003000576	2	3633641	3635090	1449	142.9	-4.2	0.39	1.429e-27	1.232e-26
AO090005001021	1	3702670	3704342	1672	2865.62	1.3	0.12	1.345e-26	1.143e-25		AO090010000106	8	3136927	3144296	7369	3429.24	1.84	0.17	1.59e-27	1.37e-26
AO090005000957	1	3873484	3874787	1303	99.67	-2.59	0.25	1.349e-26	1.145e-25		AO090005000438	1	5287972	5289266	1294	34048.8	1.53	0.14	1.601e-27	1.379e-26
AO090003001542	2	6217700	6218477	777	204	-2.18	0.21	1.422e-26	1.207e-25		AO090120000210	5	3214690	3216262	1572	1323.84	1.71	0.16	1.637e-27	1.408e-26
AO090009000355	1	947359	948199	840	1931	1.7	0.16	1.436e-26	1.218e-25		AO090102000303	4	3715874	3716609	735	143.1	-4.03	0.38	1.656e-27	1.424e-26
AO090011000558	7	1410715	1412803	2088	83.74	-3.41	0.33	1.657e-26	1.403e-25		AO090011000850	7	2172317	2172901	584	1590.28	1.86	0.17	1.703e-27	1.463e-26
AO090026000648	3	3335122	3335802	680	480.97	-1.35	0.13	1.678e-26	1.42e-25		AO090026000695	3	3220169	3221221	1052	2432.41	-1.85	0.17	2.018e-27	1.732e-26
AO090003000678	2	3925081	3927397	2316	8218.67	-1.62	0.16	1.801e-26	1.523e-25		AO090020000224	6	1260388	1261638	1250	154.52	-2.9	0.27	2.028e-27	1.739e-26
AO090026000837	3	2828823	2830935	2112	397.85	1.21	0.12	1.84e-26	1.555e-25		AO090003000102	2	2364989	2365574	585	441.06	2.03	0.19	2.05e-27	1.757e-26
AO090026000682	3	3246914	3248377	1463	99.78	-2.63	0.25	1.842e-26	1.555e-25		AO090102000276	4	3772088	3773271	1183	3301.73	2.29	0.21	2.147e-27	1.839e-26
AO090001000592	2	1550814	1551603	789	6529.24	1.6	0.15	2.21e-26	1.865e-25		AO090012000855	4	2203969	2205755	1786	9216.46	1.64	0.15	2.18e-27	1.865e-26
AO090026000668	3	3276714	3277514	800	286.48	-1.62	0.15	2.243e-26	1.891e-25		AO090005001626	1	2079690	2081100	1410	236.93	-3.07	0.29	2.252e-27	1.925e-26
AO090120000105	5	2942532	2944092	1560	1169.62	1.69	0.16	2.256e-26	1.901e-25		AO090005000050	1	6305904	6307371	1467	213.14	10.66	1.04	2.257e-27	1.928e-26
AO090124000052	5	2561017	2562357	1340	3539.33	-1.28	0.12	2.303e-26	1.939e-25		AO090138000086	6	4016436	4020967	4531	281.3	-1.83	0.17	2.288e-27	1.953e-26
AO090005000169	1	5973941	5977656	3715	2487.16	-1.89	0.18	2.359e-26	1.985e-25		AO090005001079	1	3565060	3566868	1808	242.94	-6.67	0.63	2.295e-27	1.957e-26
AO090009000024	1	75760	76364	604	181.5	1.82	0.17	2.371e-26	1.993e-25		AO090011000084	7	240829	241656	827	98.03	-4.27	0.4	2.418e-27	2.061e-26
AO090010000705	8	1558906	1559820	914	1337.97	-1.37	0.13	2.498e-26	2.098e-25		AO090003001382	2	5824453	5825878	1425	1760.85	-3.72	0.35	2.442e-27	2.08e-26
AO090038000337	6	2777763	2780468	2705	239.55	-1.87	0.18	2.593e-26	2.177e-25		AO090009000196	1	527366	527818	452	595.86	1.58	0.15	2.511e-27	2.137e-26
AO090005000871	1	4099237	4099613	376	4285.93	-2.89	0.28	2.714e-26	2.277e-25		AO090023000945	3	2492253	2495630	3377	3603.63	-1.67	0.16	2.529e-27	2.151e-26
AO090003000852	2	4408178	4409355	1177	3344.12	-1.16	0.11	2.735e-26	2.292e-25		AO090009000322	1	856888	857970	1082	119.08	-3.7	0.35	2.639e-27	2.242e-26
AO090012000446	4	1119309	1119900	591	240.75	-2.51	0.24	2.745e-26	2.299e-25		AO090701000642	5	676520	679178	2658	275.7	2.81	0.27	2.713e-27	2.304e-26
AO090113000182	5	4474657	4475984	1327	761.73	-1.53	0.15	2.78e-26	2.327e-25		AO090003000864	2	4439013	4441476	2463	5329.8	-1.72	0.16	2.807e-27	2.382e-26
AO090005000571	1	4942590	4943969	1379	846.85	-1.7	0.16	2.833e-26	2.369e-25		AO090005001304	1	2927524	2928872	1348	594.65	1.8	0.17	2.902e-27	2.46e-26
AO090026000634	3	3368209	3368749	540	287.63	2.01	0.19	2.838e-26	2.372e-25		AO090003000879	2	4480854	4483720	2866	3313.05	2.95	0.28	3.095e-27	2.622e-26
AO090003001525	2	6179372	6181242	1870	182.09	-2.73	0.26	3.285e-26	2.742e-25		AO090308000009	1	6480274	6482625	2351	1928.97	-3.12	0.3	3.101e-27	2.625e-26
AO090010000154	8	3000439	3001893	1454	135.23	-2.11	0.2	3.396e-26	2.832e-25		AO090023000821	3	2139772	2142862	3090	1354.94	1.39	0.13	3.12e-27	2.639e-26
AO090011000651	7	1692150	1693665	1515	2314.12	1.76	0.17	3.47e-26	2.892e-25		AO090009000427	1	1124016	1125638	1622	751.78	-2.79	0.26	3.372e-27	2.85e-26
AO090003000301	2	2909057	2910614	1557	3812.89	1.73	0.17	3.611e-26	3.005e-25		AO090701000774	5	323676	324770	1094	227.09	-2.47	0.23	3.376e-27	2.851e-26
AO090011000760	7	1944794	1945506	712	726.66	1.06	0.1	3.659e-26	3.041e-25		AO090120000141	5	3030949	3032838	1889	875.36	1.71	0.16	3.399e-27	2.868e-26
AO090103000193	8	779735	780553	818	66.84	2.52	0.24	3.657e-26	3.041e-25		AO090011000423	7	1077156	1078473	1317	4305.07	-2.29	0.22	3.451e-27	2.91e-26
AO090010000643	8	1710394	1711129	735	456.17	2.21	0.21	3.814e-26	3.167e-25		AO090005000690	1	4605611	4609448	3837	5687.01	2.46	0.23	3.707e-27	3.124e-26
AO090124000046	5	2573528	2574462	934	856.57	1.24	0.12	3.992e-26	3.313e-25		AO090012000812	4	2085286	2087380	2094	3159.67	2.37	0.22	3.788e-27	3.189e-26
AO090003000633	2	3799976	3801271	1295	6717.75	1.48	0.14	4.006e-26	3.322e-25		AO090005001057	1	3621235	3622900	1665	296.85	2.39	0.23	3.98e-27	3.348e-26
AO090020000546	6	424852	425281	429	142.88	-3.65	0.36	4.045e-26	3.349e-25		AO090010000302	8	2544860	2547372	2512	770.58	-1.41	0.13	4.556e-27	3.83e-26
AO090005000770	1	4363401	4364827	1426	1385.2	1.12	0.11	4.331e-26	3.584e-25		AO090001000485	2	1227678	1228311	633	22426.2	2.42	0.23	4.605e-27	3.869e-26
AO090701000070	5	2163009	2163800	791	2231.83	1.11	0.11	4.518e-26	3.736e-25		AO090003000217	2	2662533	2664263	1730	666.59	-1.83	0.17	4.956e-27	4.161e-26
AO090120000043	5	2785372	2786752	1380	213.69	-1.77	0.17	4.582e-26	3.786e-25		AO090005000527	1	5048146	5048977	831	268.94	-2.66	0.25	5.094e-27	4.273e-26
AO090010000059	8	3245533	3248088	2555	745.65	1.71	0.16	4.83e-26	3.988e-25		AO090026000288	3	4294474	4295629	1155	404.47	-2.43	0.23	5.363e-27	4.495e-26
AO090003000931	2	4622954	4624453	1499	392.25	-2.8	0.27	5.011e-26	4.135e-25		AO090012000787	4	2029064	2030331	1267	30727.1	-1.86	0.17	5.436e-27	4.553e-26
AO090005001492	1	2473983	2475398	1415	886.21	-1	0.1	5.197e-26	4.282e-25		AO090103000065	8	1087787	1091156	3369	690.99	1.9	0.18	5.604e-27	4.69e-26
AO090011000817	7	2075988	2078275	2287	777.14	-1.7	0.16	5.293e-26	4.358e-25		AO090102000007	4	4518239	4519830	1591	203.56	-5.69	0.54	5.756e-27	4.814e-26
AO090011000369	7	947780	949040	1260	1456.2	-1.41	0.14	5.79e-26	4.76e-25		AO090009000644	1	1718237	1719614	1377	11705.1	1.15	0.11	6.124e-27	5.118e-26
AO090003000228	2	2694460	2695140	680	565.36	-1.12	0.11	5.901e-26	4.848e-25		AO090023000746	3	1953409	1954843	1434	801.01	-2.75	0.26	6.338e-27	5.292e-26
AO090701000554	5	888094	888595	501	68675.4	2.72	0.26	5.997e-26	4.923e-25		AO090001000749	2	1992193	1993824	1631	1433.7	2.65	0.25	6.489e-27	5.415e-26
AO090124000027	5	2610975	2612391	1416	258.11	2.26	0.22	6.231e-26	5.105e-25		AO090010000459	8	2164156	2166120	1964	886.98	1.46	0.14	6.564e-27	5.473e-26
AO090701000712	5	478009	479416	1407	389.87	-2.34	0.23	6.591e-26	5.396e-25		AO090120000428	5	3824240	3825113	873	1038.43	2.27	0.21	7.034e-27	5.86e-26
AO090023000258	3	661372	662552	1180	245.66	1.5	0.14	6.757e-26	5.528e-25		AO090701000743	5	397780	399459	1679	325.43	3.96	0.38	7.199e-27	5.993e-26
AO090701000671	5	608171	609837	1666	3068.39	1.57	0.15	6.766e-26	5.531e-25		AO090005001212	1	3216747	3218555	1808	4200.14	2.75	0.26	7.248e-27	6.03e-26
AO090138000053	6	4085468	4086443	975	917.48	-1.54	0.15	7.101e-26	5.797e-25		AO090011000715	7	1828959	1830646	1687	2518.91	4.08	0.39	7.353e-27	6.112e-26
AO090102000293	4	3734338	3736465	2127	1583.22	-1.61	0.16	7.248e-26	5.913e-25		AO090005001328	1	2866960	2869885	2925	188.87	-4.27	0.41	7.534e-27	6.258e-26
AO090026000820	3	2887484	2890471	2987	6452.28	1.17	0.11	7.769e-26	6.334e-25		AO090011000671	7	1730606	1731831	1225	2853.89	-3.4	0.32	7.88e-27	6.541e-26
AO090701000361	5	1381820	1382939	1119	258.82	-3.83	0.38	7.889e-26	6.427e-25		AO090011000525	7	1324907	1325891	984	416	-3.1	0.3	8.019e-27	6.651e-26
AO090011000455	7	1151578	1152245	667	1141.89	-1.09	0.11	8.612e-26	7.011e-25		AO090010000443	8	2200318	2200818	500	5619.46	3.44	0.33	8.372e-27	6.938e-26
AO090005001548	1	2294040	2295325	1285	8877.99	1.37	0.13	9.315e-26	7.572e-25		AO090009000579	1	1539125	1540865	1740	252.69	4.14	0.4	9.148e-27	7.576e-26
AO090023000259	3	664075	666202	2127	1137.92	1.58	0.15	9.356e-26	7.601e-25		AO090020000352	6	952275	954418	2143	804.28	-1.5	0.14	9.441e-27	7.813e-26
AO090012000498	4	1252312	1254466	2154	28222.9	2.54	0.25	9.703e-26	7.876e-25		AO090003000902	2	4539585	4539915	330	603.83	1.48	0.14	9.849e-27	8.145e-26
AO090103000285	8	537306	538208	902	84.7	-3.63	0.36	1.074e-25	8.684e-25		AO090005001392	1	2732435	2733629	1194	596.83	1.6	0.15	1.009e-26	8.34e-26
AO090001000649	2	1713656	1716256	2600	774.53	-2.69	0.26	1.136e-25	9.182e-25		AO090012000600	4	1523841	1525218	1377	4171.97	-1.18	0.11	1.038e-26	8.569e-26
AO090005001458	1	2566900	2570347	3447	1909.72	-3.06	0.3	1.172e-25	9.471e-25		AO090102000058	4	4397323	4400204	2881	2769.32	-2.2	0.21	1.103e-26	9.097e-26
AO090011000630	7	1618455	1622275	3820	22558.7	2.15	0.21	1.187e-25	9.582e-25		AO090011000575	7	1454070	1455182	1112	945.63	-2.88	0.28	1.134e-26	9.353e-26
AO090026000037	3	5025142	5026678	1536	524.47	-1.36	0.13	1.27e-25	1.025e-24		AO090001000066	2	146664	148342	1678	98.66	-4.25	0.41	1.194e-26	9.836e-26
AO090003001006	2	4820672	4823042	2370	7345.91	1.96	0.19	1.336e-25	1.077e-24		AO090026000342	3	4138719	4141584	2865	1573.59	1.43	0.14	1.209e-26	9.949e-26
AO090701000595	5	787251	789993	2742	484.84	-1.27	0.12	1.366e-25	1.1e-24		AO090011000441	7	1120133	1121168	1035	2810.81	1.42	0.13	1.238e-26	1.018e-25
AO090012000141	4	341016	341553	537	163.67	-2.11	0.2	1.388e-25	1.117e-24		AO090005001018	1	3710374	3712616	2242	954.81	1.5	0.14	1.603e-26	1.317e-25
AO090010000480	8	2107363	2109614	2251	19479.2	-1.05	0.1	1.402e-25	1.128e-24		AO090003000338	2	3013898	3014808	910	158.16	-2.62	0.25	1.619e-26	1.33e-25
AO090012000873	4	2263431	2267324	3893	2087.86	2.17	0.21	1.451e-25	1.165e-24		AO090113000165	5	4431480	4432245	765	142.71	-2.87	0.28	1.835e-26	1.506e-25
AO090103000244	8	639193	641045	1852	144.44	-2.17	0.21	1.564e-25	1.255e-24		AO090012000423	4	1052521	1053500	979	276.58	-2.19	0.21	1.842e-26	1.511e-25
AO090005000706	1	4560902	4562450	1548	1658.88	1.92	0.19	1.605e-25	1.286e-24		AO090011000077	7	225865	227706	1841	744.67	-2.01	0.19	1.942e-26	1.591e-25
AO090003001299	2	5609065	5609422	357	115.71	1.85	0.18	1.677e-25	1.343e-24		AO090009000386	1	1030134	1031003	869	217.09	-3.61	0.35	2.072e-26	1.697e-25
AO090701000771	5	328996	330643	1647	324.6	-1.49	0.15	1.787e-25	1.431e-24		AO090003000310	2	2932422	2933543	1121	10804.9	3.8	0.37	2.174e-26	1.779e-25
AO090011000456	7	1152604	1153381	777	2114.58	1.84	0.18	1.841e-25	1.472e-24		AO090038000249	6	3010889	3011784	895	43961.9	2.68	0.26	2.249e-26	1.839e-25
AO090003000602	2	3703950	3704907	957	938.58	1.84	0.18	1.947e-25	1.554e-24		AO090023000370	3	943593	944937	1344	1088.56	-3.66	0.35	2.38e-26	1.945e-25
AO090011000077	7	225865	227706	1841	173.48	-2.56	0.25	2.025e-25	1.616e-24		AO090003001020	2	4851668	4853564	1896	1436.46	1.32	0.13	2.539e-26	2.073e-25
AO090011000062	7	188624	190585	1961	2773.4	-2.63	0.26	2.092e-25	1.668e-24		AO090020000520	6	485685	487045	1360	52949.1	1.5	0.14	2.6e-26	2.121e-25
AO090011000217	7	562248	562886	638	806.67	2.4	0.23	2.242e-25	1.785e-24		AO090001000387	2	977273	978348	1075	2717.72	-3.55	0.34	2.617e-26	2.134e-25
AO090003001455	2	5997082	5997881	799	134.16	3.74	0.37	2.248e-25	1.789e-24		AO090103000059	8	1098752	1099684	932	651.41	-1.73	0.17	2.752e-26	2.242e-25
AO090009000210	1	564651	565394	743	493.72	1.18	0.11	2.452e-25	1.949e-24		AO090005001461	1	2560282	2561910	1628	28006.9	1.52	0.15	3.057e-26	2.489e-25
AO090003000460	2	3319299	3321103	1804	293.08	-1.51	0.15	2.5e-25	1.986e-24		AO090011000889	7	2273805	2274520	715	506.85	-3.31	0.32	3.145e-26	2.558e-25
AO090003001047	2	4907903	4908761	858	20563.5	-1.3	0.13	2.698e-25	2.141e-24		AO090003000244	2	2741095	2742116	1021	1218.24	-1.42	0.14	3.151e-26	2.561e-25
AO090701000899	5	18272	21398	3126	522.74	-3.16	0.31	2.705e-25	2.145e-24		AO090005001471	1	2538652	2540820	2168	1869.3	1.16	0.11	3.215e-26	2.612e-25
AO090003000458	2	3313952	3314978	1026	679.35	1.38	0.14	2.749e-25	2.178e-24		AO090038000291	6	2894996	2897003	2007	1080.4	1.49	0.14	3.301e-26	2.679e-25
AO090026000255	3	4398426	4402871	4445	12612.4	-2.21	0.22	2.758e-25	2.184e-24		AO090003000676	2	3921065	3922135	1070	669.94	1.5	0.14	3.349e-26	2.717e-25
AO090206000016	7	2625952	2628196	2244	5502.74	1.09	0.11	2.895e-25	2.29e-24		AO090012000086	4	208244	208963	719	819.57	3.5	0.34	3.553e-26	2.88e-25
AO090012000945	4	2444684	2446699	2015	137.67	-2.34	0.23	3.027e-25	2.394e-24		AO090120000281	5	3405733	3406508	775	668.23	1.3	0.12	3.896e-26	3.155e-25
AO090020000083	6	1596038	1596893	855	1520.65	1.59	0.16	3.226e-25	2.549e-24		AO090011000661	7	1712053	1712812	759	1503.92	1.56	0.15	4.128e-26	3.341e-25
AO090701000644	5	667158	668182	1024	117.11	1.76	0.17	3.268e-25	2.58e-24		AO090038000125	6	3350571	3351210	639	223.89	-3.62	0.35	4.192e-26	3.39e-25
AO090206000079	7	2793614	2796753	3139	4071.6	-1.74	0.17	3.279e-25	2.587e-24		AO090009000212	1	568964	573246	4282	11681.8	1.57	0.15	4.254e-26	3.438e-25
AO090103000416	8	211573	212502	929	2227.68	2.4	0.24	3.601e-25	2.84e-24		AO090023000350	3	893876	894845	969	418.48	-1.78	0.17	4.326e-26	3.494e-25
AO090001000147	2	329533	330042	509	724.6	-2.59	0.25	3.797e-25	2.992e-24		AO090166000044	4	4665289	4667127	1838	965.24	-1.86	0.18	4.542e-26	3.666e-25
AO090011000420	7	1069062	1070805	1743	487.09	-1.7	0.17	3.825e-25	3.012e-24		AO090012000500	4	1260558	1262335	1777	225.97	2.21	0.21	4.641e-26	3.743e-25
AO090009000235	1	625831	627103	1272	841.92	-1.01	0.1	3.864e-25	3.041e-24		AO090701000662	5	630595	631251	656	684.56	-2.28	0.22	5.022e-26	4.047e-25
AO090005001065	1	3597465	3597865	400	2169.69	-1.7	0.17	3.874e-25	3.046e-24		AO090026000762	3	3046505	3050322	3817	150.06	-6.16	0.6	5.152e-26	4.149e-25
AO090001000130	2	295111	295751	640	814.34	-2.43	0.24	4.237e-25	3.329e-24		AO090023000065	3	177768	178422	654	813.99	-4.72	0.46	5.318e-26	4.28e-25
AO090701000729	5	433467	434905	1438	11278.9	1.49	0.15	4.368e-25	3.431e-24		AO090102000052	4	4411927	4412752	825	423.08	5.63	0.55	5.336e-26	4.291e-25
AO090003000984	2	4768669	4769657	988	28202.4	2.43	0.24	4.624e-25	3.629e-24		AO090003001008	2	4825722	4827341	1619	7126.74	-2.5	0.24	5.515e-26	4.432e-25
AO090026000315	3	4231196	4232243	1047	2838.56	-1.21	0.12	4.808e-25	3.771e-24		AO090038000256	6	2990929	2993077	2148	916.22	-1.39	0.13	5.637e-26	4.526e-25
AO090102000461	4	3278696	3280492	1796	1117.79	-1.04	0.1	4.813e-25	3.772e-24		AO090005000352	1	5538363	5539625	1262	709.55	1.67	0.16	5.936e-26	4.763e-25
AO090020000689	6	80018	81656	1638	655.49	2.05	0.2	4.854e-25	3.802e-24		AO090026000269	3	4350171	4351028	857	1215.42	1.52	0.15	6.101e-26	4.892e-25
AO090012000173	4	416855	423343	6488	5481.96	1.16	0.11	5.057e-25	3.958e-24		AO090026000526	3	3641592	3643133	1541	694.43	2.43	0.24	6.171e-26	4.944e-25
AO090012000350	4	859774	861628	1854	81.55	-4.74	0.49	5.26e-25	4.111e-24		AO090010000365	8	2380251	2381079	828	490.16	-3.39	0.33	6.356e-26	5.089e-25
AO090102000566	4	2988072	2990503	2431	13492.9	1.19	0.12	5.498e-25	4.294e-24		AO090012000815	4	2093243	2093753	510	1981.29	2.34	0.23	6.879e-26	5.504e-25
AO090011000744	7	1901070	1902838	1768	675.54	-3.04	0.3	5.665e-25	4.422e-24		AO090011000118	7	333522	334029	507	122.7	-2.55	0.25	6.991e-26	5.589e-25
AO090011000266	7	683072	683946	874	17885.3	2.2	0.22	5.696e-25	4.443e-24		AO090009000715	1	1909559	1910585	1026	67660.5	2.18	0.21	7.039e-26	5.624e-25
AO090003000506	2	3447240	3448155	915	10907.6	1.71	0.17	5.776e-25	4.502e-24		AO090011000659	7	1708516	1710233	1717	34809.9	1.46	0.14	7.399e-26	5.907e-25
AO090038000350	6	2751938	2752922	984	1434.56	-1.54	0.15	5.855e-25	4.561e-24		AO090701000408	5	1264228	1265413	1185	176.05	-2.57	0.25	7.732e-26	6.168e-25
AO090120000385	5	3698679	3700481	1802	10092.9	2.74	0.27	5.874e-25	4.573e-24		AO090005000198	1	5907388	5908993	1605	475.78	-2.36	0.23	8.71e-26	6.943e-25
AO090038000161	6	3260924	3261463	539	167.69	-1.81	0.18	6.121e-25	4.762e-24		AO090701000304	5	1543945	1544397	452	306.53	-2.66	0.26	1.044e-25	8.32e-25
AO090003001270	2	5537028	5537703	675	289.99	1.85	0.18	6.27e-25	4.875e-24		AO090001000385	2	969148	970922	1774	7591.94	-4.91	0.48	1.091e-25	8.687e-25
AO090011000324	7	819517	820514	997	1884.2	1.32	0.13	6.96e-25	5.403e-24		AO090005001355	1	2810016	2810485	469	985.83	3	0.29	1.121e-25	8.918e-25
AO090003000457	2	3313191	3313671	480	18165.1	2.35	0.23	7.019e-25	5.446e-24		AO090701000478	5	1095770	1096703	933	572.19	-2.57	0.25	1.127e-25	8.961e-25
AO090009000102	1	287490	289032	1542	1738.44	1.35	0.13	7.158e-25	5.55e-24		AO090020000599	6	305436	306375	939	1738.61	1.77	0.17	1.16e-25	9.212e-25
AO090003001055	2	4926466	4930889	4423	40455.9	1.45	0.14	7.292e-25	5.646e-24		AO090003001506	2	6123903	6125908	2005	618.99	-2.86	0.28	1.198e-25	9.506e-25
AO090005000676	1	4642702	4643410	708	112.83	-2.08	0.2	7.289e-25	5.646e-24		AO090012000613	4	1565135	1566289	1154	32026.5	2.38	0.23	1.24e-25	9.839e-25
AO090113000183	5	4476546	4477077	531	336.4	-1.8	0.18	7.379e-25	5.71e-24		AO090003000130	2	2444297	2446191	1894	596.37	-3.13	0.31	1.275e-25	1.011e-24
AO090003000230	2	2700074	2700453	379	1476.82	2.39	0.24	7.436e-25	5.75e-24		AO090005000126	1	6105691	6107125	1434	491.55	-3.12	0.31	1.326e-25	1.05e-24
AO090026000178	3	4618496	4619072	576	4582.49	1.37	0.14	7.973e-25	6.161e-24		AO090009000039	1	108430	109831	1401	831.73	-1.9	0.18	1.342e-25	1.062e-24
AO090010000195	8	2883881	2885658	1777	311.11	1.49	0.15	9.588e-25	7.394e-24		AO090023000034	3	89924	90947	1023	70.09	2.96	0.29	1.406e-25	1.112e-24
AO090023000624	3	1637284	1638454	1170	16296.9	2.01	0.2	9.951e-25	7.67e-24		AO090003000337	2	3010817	3012646	1829	224.93	-2.71	0.27	1.448e-25	1.144e-24
AO090005000459	1	5229354	5229996	642	5135.92	-1.82	0.18	1.002e-24	7.718e-24		AO090102000099	4	4278831	4281213	2382	1144.33	1.72	0.17	1.456e-25	1.15e-24
AO090003001429	2	5942889	5944688	1799	1106.63	-3.01	0.3	1.083e-24	8.337e-24		AO090026000811	3	2908690	2910502	1812	8037.07	1.54	0.15	1.536e-25	1.212e-24
AO090003000271	2	2820469	2823916	3447	2918.53	1.04	0.1	1.106e-24	8.504e-24		AO090026000664	3	3285799	3288238	2439	2298.82	1.2	0.12	1.574e-25	1.242e-24
AO090102000104	4	4263428	4265026	1598	2456.88	-1.08	0.11	1.13e-24	8.69e-24		AO090011000775	7	1971692	1972293	601	30223.8	1.76	0.17	1.601e-25	1.262e-24
AO090012000855	4	2203969	2205755	1786	19356.9	-1.5	0.15	1.216e-24	9.337e-24		AO090102000320	4	3674625	3675393	768	206.31	-3.89	0.38	1.622e-25	1.278e-24
AO090012000590	4	1499189	1500080	891	372.58	-2.2	0.22	1.297e-24	9.954e-24		AO090012000715	4	1821160	1822561	1401	4993.22	-2.36	0.23	1.763e-25	1.387e-24
AO090012000311	4	769998	770726	728	2372.17	-3.03	0.3	1.327e-24	1.018e-23		AO090005000668	1	4663067	4664137	1070	1193.98	2.09	0.2	1.856e-25	1.46e-24
AO090005000120	1	6120537	6122750	2213	1769.31	-1.28	0.13	1.382e-24	1.059e-23		AO090206000102	7	2853256	2854339	1083	634.76	-2.44	0.24	1.985e-25	1.56e-24
AO090003001428	2	5939789	5941819	2030	297.07	-2.61	0.26	1.599e-24	1.223e-23		AO090005000582	1	4903216	4905077	1861	45977	2.16	0.21	2.065e-25	1.622e-24
AO090012000389	4	954749	957837	3088	181.5	-2.97	0.3	1.638e-24	1.252e-23		AO090011000908	7	2370459	2372207	1748	202.85	-3.11	0.31	2.106e-25	1.653e-24
AO090010000717	8	1536133	1536990	857	80.67	3.23	0.32	1.652e-24	1.262e-23		AO090003000505	2	3444442	3446764	2322	1164.26	1.54	0.15	2.246e-25	1.761e-24
AO090701000537	5	931980	933652	1672	8276.42	-3	0.3	1.735e-24	1.323e-23		AO090124000084	5	2467555	2473898	6343	12899.9	1.55	0.15	2.25e-25	1.763e-24
AO090011000765	7	1953514	1953968	454	93.76	1.88	0.19	1.773e-24	1.351e-23		AO090010000725	8	1517239	1517861	622	96.27	3.54	0.35	2.339e-25	1.832e-24
AO090003001377	2	5812084	5813052	968	355.34	-1.26	0.13	1.778e-24	1.354e-23		AO090003000713	2	4010757	4011846	1089	789.6	-3.66	0.36	2.429e-25	1.9e-24
AO090011000788	7	1998484	2000769	2285	244.64	-1.69	0.17	1.786e-24	1.359e-23		AO090011000780	7	1981892	1983197	1305	911.91	1.94	0.19	2.801e-25	2.191e-24
AO090012000646	4	1647942	1650165	2223	3304.6	1.04	0.1	1.848e-24	1.405e-23		AO090038000287	6	2904076	2905158	1082	23428.8	1.99	0.2	3.015e-25	2.356e-24
AO090010000057	8	3253006	3254200	1194	91.3	-3.09	0.31	1.868e-24	1.42e-23		AO090138000034	6	4125804	4126248	444	667.35	-4.57	0.45	3.077e-25	2.403e-24
AO090005000313	1	5612118	5613597	1479	180.85	2.39	0.24	2.058e-24	1.562e-23		AO090001000659	2	1738411	1738906	495	410.99	1.84	0.18	3.108e-25	2.425e-24
AO090102000627	4	2835275	2837167	1892	61341.6	1.52	0.15	2.101e-24	1.594e-23		AO090701000725	5	439915	440965	1050	6737.61	1.7	0.17	3.218e-25	2.509e-24
AO090003001191	2	5334211	5335752	1541	905.2	1.47	0.15	2.121e-24	1.608e-23		AO090003001406	2	5883817	5885749	1932	455.28	2.98	0.29	3.312e-25	2.581e-24
AO090005000050	1	6305904	6307371	1467	923.21	2.51	0.25	2.202e-24	1.667e-23		AO090003001155	2	5247101	5249161	2060	1188.42	2.16	0.21	3.542e-25	2.758e-24
AO090038000419	6	2548332	2548751	419	88.55	-3.03	0.3	2.216e-24	1.676e-23		AO090005001602	1	2131819	2133827	2008	7289.91	-1.36	0.13	3.59e-25	2.794e-24
AO090011000832	7	2117660	2119043	1383	602.73	1.06	0.11	2.337e-24	1.766e-23		AO090023000621	3	1626701	1628378	1677	136.13	-4.01	0.4	3.796e-25	2.952e-24
AO090026000307	3	4254336	4257767	3431	42.3	3.63	0.37	2.443e-24	1.843e-23		AO090023000615	3	1615186	1616776	1590	439.26	-2.11	0.21	3.847e-25	2.99e-24
AO090026000070	3	4943970	4944981	1011	694.62	-2.49	0.25	2.519e-24	1.9e-23		AO090701000580	5	816495	816903	408	137.45	-2.66	0.26	4.38e-25	3.401e-24
AO090009000486	1	1286803	1288782	1979	2486.21	-1.18	0.12	2.543e-24	1.916e-23		AO090102000449	4	3306145	3308482	2337	552.12	-1.99	0.2	4.62e-25	3.585e-24
AO090038000123	6	3352211	3353123	912	74.71	-2.94	0.3	2.672e-24	2.012e-23		AO090701000854	5	122934	124976	2042	159.8	-2.67	0.26	4.625e-25	3.587e-24
AO090038000486	6	2366927	2367547	620	306.8	-1.59	0.16	2.687e-24	2.021e-23		AO090010000218	8	2821028	2824049	3021	3001.38	1.59	0.16	4.665e-25	3.615e-24
AO090023000213	3	533232	534436	1204	74.04	-3.44	0.35	2.825e-24	2.122e-23		AO090005000895	1	4030947	4033879	2932	279.32	-1.78	0.17	4.758e-25	3.685e-24
AO090701000490	5	1066285	1068460	2175	409.93	-2.06	0.21	2.824e-24	2.122e-23		AO090003000772	2	4169694	4173737	4043	888.73	-3.29	0.33	4.784e-25	3.702e-24
AO090003000571	2	3618149	3620453	2304	19242.1	1.57	0.16	2.969e-24	2.229e-23		AO090103000138	8	903699	904757	1058	4603.13	1.89	0.19	4.873e-25	3.768e-24
AO090012000458	4	1146034	1146565	531	77.42	-4.14	0.43	3.056e-24	2.292e-23		AO090120000291	5	3430572	3431937	1365	1365.72	1.31	0.13	5.055e-25	3.906e-24
AO090011000509	7	1274484	1277064	2580	1166.39	1.15	0.12	3.327e-24	2.495e-23		AO090012000940	4	2420367	2421712	1345	1196.6	1.45	0.14	5.77e-25	4.456e-24
AO090011000660	7	1710623	1711970	1347	1547.86	1.05	0.1	3.489e-24	2.615e-23		AO090120000169	5	3113275	3114043	768	13452.6	1.84	0.18	5.925e-25	4.572e-24
AO090102000411	4	3403464	3404325	861	86.64	-2.85	0.29	3.58e-24	2.681e-23		AO090005000990	1	3778919	3781460	2541	376.49	-2.22	0.22	6.06e-25	4.673e-24
AO090003000813	2	4270485	4271553	1068	2215.91	1.47	0.15	3.612e-24	2.703e-23		AO090103000340	8	400855	402886	2031	2744.54	1.63	0.16	6.101e-25	4.702e-24
AO090005000616	1	4819500	4820758	1258	3545.7	1.66	0.17	3.902e-24	2.918e-23		AO090005001071	1	3582956	3585394	2438	1926.09	1.42	0.14	6.965e-25	5.364e-24
AO090012001027	4	2662918	2665696	2778	9679.52	1.4	0.14	4.026e-24	3.008e-23		AO090011000220	7	566156	566735	579	77.79	-4.23	0.42	7.743e-25	5.958e-24
AO090026000478	3	3772389	3772996	607	478.96	1.16	0.12	4.098e-24	3.059e-23		AO090120000415	5	3794369	3794963	594	294.89	-2.28	0.23	7.812e-25	6.007e-24
AO090701000126	5	2002737	2003164	427	712.44	-1.1	0.11	4.097e-24	3.059e-23		AO090102000388	4	3466271	3468049	1778	17116.7	11.07	1.15	8.178e-25	6.285e-24
AO090009000050	1	133766	135017	1251	4178.4	1.17	0.12	4.709e-24	3.51e-23		AO090113000052	5	4169535	4171092	1557	289.3	-5.9	0.59	8.889e-25	6.826e-24
AO090020000540	6	441737	442419	682	9755.18	-2.02	0.2	4.757e-24	3.543e-23		AO090038000466	6	2422023	2425594	3571	5786.59	2.28	0.23	8.921e-25	6.846e-24
AO090102000499	4	3173551	3174538	987	511.04	1.26	0.13	5.152e-24	3.833e-23		AO090012000801	4	2057637	2058605	968	26185.9	2.53	0.25	9.129e-25	7.001e-24
AO090009000581	1	1547685	1549299	1614	72.14	-3.29	0.34	5.264e-24	3.914e-23		AO090102000543	4	3049081	3050609	1528	727.94	1.9	0.19	9.341e-25	7.159e-24
AO090026000207	3	4525919	4527764	1845	1411.65	-3.06	0.31	5.476e-24	4.066e-23		AO090005001116	1	3454972	3456337	1365	1135.85	1.62	0.16	9.527e-25	7.296e-24
AO090005000278	1	5695119	5695860	741	3838.86	1.46	0.15	5.637e-24	4.181e-23		AO090003000422	2	3209553	3212245	2692	35368.6	2.69	0.27	9.982e-25	7.639e-24
AO090005001535	1	2333267	2334380	1113	8112.42	2.58	0.26	5.763e-24	4.269e-23		AO090009000392	1	1046545	1046916	371	507.25	-3.21	0.32	1.022e-24	7.815e-24
AO090005000669	1	4661545	4662067	522	412.63	1.13	0.11	6.017e-24	4.451e-23		AO090120000229	5	3277976	3279693	1717	1139.98	-2.58	0.26	1.029e-24	7.866e-24
AO090103000051	8	1114446	1115863	1417	2608.86	1.36	0.14	6.097e-24	4.507e-23		AO090120000053	5	2801827	2803039	1212	11269.6	2.07	0.21	1.053e-24	8.04e-24
AO090012000602	4	1530839	1533169	2330	1847.31	-1.08	0.11	6.14e-24	4.536e-23		AO090023000571	3	1504746	1507097	2351	4742.53	-1.57	0.16	1.198e-24	9.142e-24
AO090003000583	2	3648767	3649798	1031	4963.86	1.13	0.11	6.147e-24	4.538e-23		AO090003001099	2	5083840	5088094	4254	12788.7	-1.98	0.2	1.259e-24	9.599e-24
AO090023000800	3	2075404	2077240	1836	671.51	-1.43	0.14	6.711e-24	4.952e-23		AO090020000341	6	978786	981388	2602	2294.61	-2.15	0.21	1.269e-24	9.674e-24
AO090003000564	2	3599432	3602504	3072	2780.74	-2.41	0.24	6.955e-24	5.125e-23		AO090701000717	5	464628	465969	1341	948.01	3.2	0.32	1.271e-24	9.679e-24
AO090026000831	3	2855197	2858162	2965	4576.27	-1.02	0.1	7.399e-24	5.449e-23		AO090012000415	4	1019963	1021391	1428	2129.33	1.95	0.19	1.395e-24	1.062e-23
AO090026000547	3	3584906	3586791	1885	225.12	-1.51	0.15	7.832e-24	5.76e-23		AO090113000066	5	4208140	4210467	2327	2219.44	-2.3	0.23	1.399e-24	1.064e-23
AO090124000079	5	2488107	2489440	1333	28810.5	1.21	0.12	7.993e-24	5.875e-23		AO090003000183	2	2587897	2588950	1053	1290.67	1.52	0.15	1.407e-24	1.07e-23
AO090701000459	5	1139320	1139864	544	82.28	-2.59	0.26	8.07e-24	5.927e-23		AO090020000439	6	700741	701938	1197	256.32	-2.24	0.22	1.409e-24	1.07e-23
AO090020000435	6	709394	713289	3895	28078.3	-1.02	0.1	8.16e-24	5.99e-23		AO090701000070	5	2163009	2163800	791	1908.96	1.31	0.13	1.429e-24	1.085e-23
AO090026000355	3	4105197	4107429	2232	4440.17	-2.61	0.26	8.279e-24	6.073e-23		AO090005000729	1	4477770	4478241	471	3492.27	1.28	0.13	1.491e-24	1.131e-23
AO090701000269	5	1637275	1638774	1499	4391.05	1.56	0.16	8.79e-24	6.44e-23		AO090009000265	1	704477	705830	1353	502.64	2.24	0.22	1.498e-24	1.136e-23
AO090011000114	7	319125	323335	4210	5974.05	-2.71	0.28	9.321e-24	6.816e-23		AO090003001289	2	5579978	5582111	2133	132.86	-2.64	0.26	1.542e-24	1.168e-23
AO090701000254	5	1669450	1670620	1170	5822.3	1.5	0.15	9.536e-24	6.969e-23		AO090012000283	4	701204	702760	1556	116.72	-4.77	0.48	1.582e-24	1.197e-23
AO090701000552	5	891000	892934	1934	1783.77	1.27	0.13	9.944e-24	7.258e-23		AO090005000779	1	4340857	4342070	1213	1539.01	-2.55	0.26	1.621e-24	1.226e-23
AO090011000503	7	1261602	1262590	988	633.31	1.29	0.13	1.046e-23	7.623e-23		AO090001000427	2	1073219	1074636	1417	625.02	1.88	0.19	1.716e-24	1.297e-23
AO090023000648	3	1703400	1704402	1002	819.14	1.05	0.11	1.061e-23	7.727e-23		AO090020000008	6	1805968	1807948	1980	17995.7	1.11	0.11	1.807e-24	1.365e-23
AO090003000248	2	2751488	2752454	966	4326.41	1.45	0.15	1.096e-23	7.979e-23		AO090005000265	1	5731754	5732498	744	21255	2.32	0.23	1.953e-24	1.474e-23
AO090005000918	1	3972642	3973573	931	4712.81	1.02	0.1	1.139e-23	8.285e-23		AO090103000085	8	1041149	1043178	2029	1276.99	-2.65	0.27	2.16e-24	1.629e-23
AO090102000492	4	3199751	3201548	1797	786.59	1.74	0.18	1.14e-23	8.286e-23		AO090011000795	7	2020206	2023865	3659	9029.21	1.88	0.19	2.212e-24	1.668e-23
AO090038000162	6	3255893	3260597	4704	832.09	-2.61	0.27	1.173e-23	8.516e-23		AO090009000264	1	702624	704042	1418	33479	2.41	0.24	2.28e-24	1.718e-23
AO090003000431	2	3234842	3235526	684	1876.45	-1.41	0.14	1.179e-23	8.559e-23		AO090103000348	8	374508	377356	2848	1634.02	1.67	0.17	2.605e-24	1.961e-23
AO090003000041	2	2198303	2199179	876	475.58	-1.29	0.13	1.21e-23	8.775e-23		AO090023000443	3	1125762	1127004	1242	354.87	3.42	0.35	2.637e-24	1.984e-23
AO090012000435	4	1087203	1088172	969	521	-1.44	0.15	1.216e-23	8.807e-23		AO090003001356	2	5771984	5773052	1068	1291.92	1.64	0.16	2.664e-24	2.003e-23
AO090103000165	8	845144	847088	1944	4527.57	-1.55	0.16	1.216e-23	8.807e-23		AO090011000261	7	666137	667859	1722	181.69	-4.73	0.48	2.709e-24	2.035e-23
AO090005000103	1	6166366	6168607	2241	8144.16	-2.85	0.29	1.285e-23	9.295e-23		AO090009000377	1	1008663	1009816	1153	28944	2.4	0.24	2.79e-24	2.094e-23
AO090003001422	2	5925283	5926060	777	126.83	-2.5	0.25	1.457e-23	1.053e-22		AO090010000210	8	2841142	2841747	605	11970.3	-1.87	0.19	2.868e-24	2.152e-23
AO090038000109	6	3389456	3392050	2594	500.54	-1.25	0.13	1.472e-23	1.063e-22		AO090005000883	1	4071194	4072783	1589	3371.07	1.05	0.1	2.977e-24	2.232e-23
AO090012000623	4	1591520	1593260	1740	37409.1	-3.22	0.33	1.58e-23	1.14e-22		AO090102000469	4	3248184	3249435	1251	122.13	2.44	0.25	3.065e-24	2.297e-23
AO090011000111	7	311172	312906	1734	252.63	-1.56	0.16	1.673e-23	1.206e-22		AO090005001317	1	2897220	2898834	1614	71.94	5.84	0.59	3.078e-24	2.305e-23
AO090012000137	4	334018	335556	1538	1197.26	-2.37	0.24	1.682e-23	1.212e-22		AO090001000312	2	795389	796624	1235	501.96	1.45	0.14	3.183e-24	2.381e-23
AO090026000396	3	3993089	3994740	1651	1252.32	2.63	0.27	1.719e-23	1.238e-22		AO090020000650	6	172502	174343	1841	438.54	3.58	0.36	3.27e-24	2.445e-23
AO090103000243	8	641618	643934	2316	70.33	-3.37	0.35	1.743e-23	1.253e-22		AO090003000253	2	2766429	2768245	1816	9489.96	1.8	0.18	3.323e-24	2.483e-23
AO090003000672	2	3898501	3901169	2668	2221.52	-1.17	0.12	1.749e-23	1.257e-22		AO090023000830	3	2166062	2166870	808	19359.7	2.12	0.21	3.57e-24	2.666e-23
AO090009000582	1	1549420	1551426	2006	402.79	1.45	0.15	1.824e-23	1.31e-22		AO090003001545	2	6222299	6225365	3066	105.2	-5.03	0.51	3.728e-24	2.782e-23
AO090010000660	8	1669304	1671555	2251	87.75	-2.58	0.26	1.84e-23	1.32e-22		AO090102000588	4	2934891	2935975	1084	8533.98	-3.94	0.4	3.739e-24	2.789e-23
AO090120000372	5	3663311	3664403	1092	1015.32	-2.72	0.28	1.84e-23	1.32e-22		AO090001000455	2	1160941	1162370	1429	1736.47	1.8	0.18	3.759e-24	2.801e-23
AO090023000040	3	103340	105219	1879	658.04	1.04	0.11	1.863e-23	1.336e-22		AO090011000472	7	1187085	1188561	1476	5154.99	-2.82	0.29	3.853e-24	2.869e-23
AO090026000278	3	4327615	4329604	1989	398.98	-1.38	0.14	1.955e-23	1.399e-22		AO090003000636	2	3811928	3813288	1360	19671.6	2.53	0.26	4.123e-24	3.069e-23
AO090011000416	7	1059956	1060664	708	1973.53	1.53	0.16	1.961e-23	1.402e-22		AO090026000557	3	3557358	3557841	483	3129.48	1.74	0.17	4.161e-24	3.095e-23
AO090005000488	1	5140337	5142385	2048	376.76	1.99	0.2	2.155e-23	1.54e-22		AO090003000578	2	3638820	3639279	459	100.57	-2.99	0.3	4.347e-24	3.231e-23
AO090005001197	1	3261537	3262931	1394	1885.03	-2.25	0.23	2.19e-23	1.564e-22		AO090020000702	6	45392	46180	788	261.55	-2.04	0.21	4.417e-24	3.281e-23
AO090001000660	2	1739003	1740109	1106	3215.73	1.26	0.13	2.191e-23	1.564e-22		AO090011000589	7	1492391	1493175	784	2138.85	1.59	0.16	4.443e-24	3.298e-23
AO090005001624	1	2083062	2084218	1156	6955.77	1.25	0.13	2.207e-23	1.573e-22		AO090005000016	1	6376514	6377810	1296	14280.2	-1.34	0.13	4.478e-24	3.322e-23
AO090003000959	2	4692111	4693497	1386	1263.56	1.15	0.12	2.394e-23	1.704e-22		AO090026000480	3	3765962	3769496	3534	1133.91	-1.45	0.14	4.992e-24	3.7e-23
AO090001000167	2	377332	378967	1635	101.31	2.1	0.21	2.42e-23	1.722e-22		AO090011000506	7	1269560	1270058	498	1778.5	1.29	0.13	5.022e-24	3.72e-23
AO090003000325	2	2978903	2980809	1906	1007.24	2.2	0.22	2.477e-23	1.761e-22		AO090026000056	3	4976921	4978419	1498	333.73	3.42	0.35	5.037e-24	3.729e-23
AO090023000222	3	554312	557436	3124	4833.31	1.26	0.13	2.518e-23	1.79e-22		AO090026000051	3	4988058	4989890	1832	679.31	-5.08	0.51	5.222e-24	3.863e-23
AO090005001423	1	2661086	2663204	2118	1874.75	1.3	0.13	2.532e-23	1.798e-22		AO090011000914	7	2386052	2387607	1555	895.53	-1.25	0.12	5.399e-24	3.991e-23
AO090166000107	4	4848412	4850099	1687	682.47	-1.95	0.2	2.585e-23	1.834e-22		AO090009000594	1	1580995	1582515	1520	1172.29	1.59	0.16	5.446e-24	4.024e-23
AO090005000930	1	3938215	3939405	1190	86.67	-3.34	0.35	2.913e-23	2.064e-22		AO090023000531	3	1410682	1411992	1310	992.69	-4.02	0.41	5.462e-24	4.033e-23
AO090103000334	8	421501	422686	1185	113.82	-2.19	0.22	2.914e-23	2.064e-22		AO090011000468	7	1178932	1181534	2602	591.7	1.38	0.14	5.523e-24	4.075e-23
AO090020000508	6	523889	525083	1194	485.67	-3.29	0.34	2.934e-23	2.076e-22		AO090005001069	1	3587188	3588550	1362	2509.05	-1.53	0.15	5.68e-24	4.188e-23
AO090026000101	3	4834307	4836129	1822	265.77	-1.45	0.15	3.188e-23	2.253e-22		AO090138000202	6	3698690	3703192	4502	399.41	-1.79	0.18	5.743e-24	4.231e-23
AO090023000882	3	2309587	2310414	827	1731.46	1.39	0.14	3.202e-23	2.261e-22		AO090023000720	3	1897961	1898755	794	202.36	-4.9	0.5	5.758e-24	4.24e-23
AO090023000327	3	832977	834517	1540	51.99	2.77	0.29	3.33e-23	2.347e-22		AO090012000821	4	2121367	2122474	1107	77202.3	-2.21	0.22	6.254e-24	4.602e-23
AO090023000321	3	816309	817602	1293	962.68	1.34	0.14	3.425e-23	2.413e-22		AO090020000691	6	75837	77039	1202	474.18	-1.53	0.15	6.422e-24	4.722e-23
AO090038000520	6	2270798	2273016	2218	614.55	-1.42	0.15	3.464e-23	2.439e-22		AO090020000551	6	418261	420225	1964	2551.96	1.1	0.11	6.429e-24	4.724e-23
AO090012000073	4	175489	176252	763	171.67	-2.14	0.22	3.571e-23	2.511e-22		AO090001000283	2	706985	707376	391	145.54	-4.46	0.45	6.617e-24	4.86e-23
AO090005000471	1	5192569	5194785	2216	4272.06	-1.82	0.19	3.588e-23	2.522e-22		AO090012000135	4	327270	329907	2637	179.86	-5.53	0.56	7.102e-24	5.212e-23
AO090005001450	1	2598609	2599598	989	6236.63	1.1	0.11	3.889e-23	2.732e-22		AO090113000182	5	4474657	4475984	1327	1356.46	-1.77	0.18	7.108e-24	5.213e-23
AO090005000019	1	6369857	6371850	1993	82.96	-3.89	0.41	4.107e-23	2.883e-22		AO090026000789	3	2987724	2988411	687	995.21	1.62	0.16	7.223e-24	5.293e-23
AO090023000924	3	2427066	2428068	1002	165.35	2.13	0.22	4.243e-23	2.977e-22		AO090138000009	6	4171913	4173401	1488	99.4	-3.5	0.36	7.226e-24	5.293e-23
AO090010000301	8	2547507	2548541	1034	161.59	-1.73	0.18	4.252e-23	2.981e-22		AO090011000756	7	1933988	1934711	723	628.86	2.25	0.23	7.328e-24	5.364e-23
AO090102000043	4	4435533	4437372	1839	248.71	-1.48	0.15	4.287e-23	3.004e-22		AO090026000455	3	3840928	3843173	2245	2175.02	2.97	0.3	7.373e-24	5.393e-23
AO090001000511	2	1315857	1317574	1717	1933.53	-2.44	0.25	4.688e-23	3.283e-22		AO090120000304	5	3482320	3483364	1044	886.11	2.15	0.22	7.396e-24	5.406e-23
AO090113000010	5	4072675	4073690	1015	473.84	-1.18	0.12	4.701e-23	3.29e-22		AO090003000782	2	4195753	4197571	1818	1851.66	-2.39	0.24	7.674e-24	5.606e-23
AO090005000436	1	5292831	5294348	1517	24968.8	1.2	0.12	4.719e-23	3.3e-22		AO090011000872	7	2233866	2234814	948	500.95	1.83	0.18	7.694e-24	5.617e-23
AO090005000837	1	4177413	4178427	1014	1799.35	1.27	0.13	5.019e-23	3.509e-22		AO090001000667	2	1756078	1757085	1007	431.81	1.75	0.18	7.77e-24	5.669e-23
AO090011000076	7	220385	223018	2633	96.73	-2.64	0.27	5.091e-23	3.556e-22		AO090038000353	6	2744415	2745406	991	1403.67	-1.46	0.15	8.284e-24	6.04e-23
AO090001000366	2	923678	925388	1710	3921.6	-1.12	0.12	5.252e-23	3.667e-22		AO090026000135	3	4739405	4741106	1701	1011.11	1.28	0.13	8.599e-24	6.265e-23
AO090023000739	3	1935842	1937017	1175	616.96	-2.69	0.28	5.372e-23	3.744e-22		AO090011000876	7	2245721	2247905	2184	6676.02	3.15	0.32	8.691e-24	6.328e-23
AO090026000760	3	3053093	3054411	1318	450.42	-2.78	0.29	5.578e-23	3.883e-22		AO090103000434	8	169600	170281	681	138.3	2.6	0.26	9.241e-24	6.724e-23
AO090001000221	2	521693	522806	1113	401.53	-1.06	0.11	5.606e-23	3.9e-22		AO090003000738	2	4075652	4076074	422	104.59	-3.03	0.31	9.29e-24	6.755e-23
AO090103000153	8	865804	869557	3753	90.66	-2.49	0.26	5.77e-23	4.012e-22		AO090001000291	2	723349	724381	1032	24543.2	-1.24	0.12	9.495e-24	6.9e-23
AO090012000244	4	599950	601059	1109	712.49	1.3	0.13	5.901e-23	4.1e-22		AO090023000766	3	2003521	2005345	1824	8900.33	1.76	0.18	9.54e-24	6.928e-23
AO090010000739	8	1477281	1478229	948	82.25	-4.11	0.44	5.908e-23	4.103e-22		AO090011000663	7	1714554	1714974	420	998.09	-2.74	0.28	1.006e-23	7.303e-23
AO090009000332	1	875752	877235	1483	1444.13	-1.11	0.11	5.963e-23	4.139e-22		AO090003001065	2	4967079	4968163	1084	6846.59	2.06	0.21	1.107e-23	8.031e-23
AO090010000570	8	1887796	1888936	1140	107.32	-2.3	0.24	6.742e-23	4.673e-22		AO090102000558	4	3007161	3008072	911	38047.1	1.97	0.2	1.115e-23	8.08e-23
AO090020000311	6	1056041	1056590	549	2056.46	-1.21	0.12	6.824e-23	4.727e-22		AO090003000446	2	3285277	3286528	1251	1816.92	-1.82	0.18	1.148e-23	8.314e-23
AO090103000422	8	195291	196773	1482	271.1	-1.33	0.14	7.154e-23	4.95e-22		AO090012000212	4	532710	533802	1092	829.06	3.09	0.32	1.168e-23	8.458e-23
AO090023000664	3	1747589	1751440	3851	335.02	1.1	0.11	7.459e-23	5.155e-22		AO090023000796	3	2069060	2069805	745	3973.92	1.22	0.12	1.203e-23	8.698e-23
AO090103000387	8	277208	278389	1181	634.76	1.02	0.1	8.029e-23	5.542e-22		AO090005001565	1	2240278	2241144	866	1988.09	1.17	0.12	1.212e-23	8.764e-23
AO090010000302	8	2544860	2547372	2512	270.17	-1.89	0.2	8.173e-23	5.638e-22		AO090102000168	4	4104489	4106449	1960	123.22	-3.55	0.36	1.228e-23	8.87e-23
AO090005000433	1	5304076	5308556	4480	20537.7	1.22	0.13	8.221e-23	5.665e-22		AO090012000228	4	566886	567357	471	104.48	2.73	0.28	1.269e-23	9.158e-23
AO090103000150	8	877082	878069	987	269	2.21	0.23	8.592e-23	5.917e-22		AO090012000876	4	2276608	2278102	1494	9973.38	-1.97	0.2	1.31e-23	9.449e-23
AO090012000757	4	1926449	1927733	1284	1490.55	-1.71	0.18	8.612e-23	5.927e-22		AO090102000421	4	3379674	3382963	3289	321.17	-2.44	0.25	1.336e-23	9.629e-23
AO090026000134	3	4741666	4743319	1653	751.32	1.02	0.11	9.481e-23	6.521e-22		AO090026000271	3	4344853	4347277	2424	8257.29	1.18	0.12	1.359e-23	9.792e-23
AO090012000546	4	1389557	1391941	2384	119.22	2.37	0.25	9.629e-23	6.619e-22		AO090113000137	5	4370720	4372388	1668	231.43	2.34	0.24	1.465e-23	1.055e-22
AO090206000065	7	2755668	2756601	933	13588.2	2.46	0.26	9.782e-23	6.72e-22		AO090020000016	6	1784755	1785358	603	2517.09	1.29	0.13	1.534e-23	1.104e-22
AO090005001249	1	3112862	3114423	1561	9052.56	1.79	0.19	1.049e-22	7.193e-22		AO090023000727	3	1913479	1915106	1627	806.89	1.81	0.18	1.619e-23	1.164e-22
AO090001000264	2	657633	658704	1071	1227.92	1.1	0.11	1.167e-22	7.993e-22		AO090120000127	5	2997980	3000177	2197	345.59	-3.99	0.41	1.66e-23	1.193e-22
AO090012000925	4	2387090	2387885	795	2193.11	-1.01	0.1	1.17e-22	8.008e-22		AO090038000465	6	2426598	2427112	514	58.81	5.48	0.56	1.817e-23	1.305e-22
AO090010000610	8	1793448	1794162	714	238.2	-1.52	0.16	1.182e-22	8.084e-22		AO090003000833	2	4337558	4338637	1079	138.18	-5.21	0.54	1.93e-23	1.386e-22
AO090010000160	8	2981773	2983450	1677	171.49	2.14	0.22	1.182e-22	8.085e-22		AO090010000608	8	1795547	1796945	1398	169.85	2.47	0.25	1.98e-23	1.42e-22
AO090009000236	1	628815	630564	1749	2279.25	1.51	0.16	1.238e-22	8.463e-22		AO090102000350	4	3574708	3576345	1637	604.1	-2.86	0.29	2.101e-23	1.506e-22
AO090005000888	1	4049968	4051275	1307	17847.2	1.11	0.12	1.294e-22	8.838e-22		AO090009000285	1	752561	753712	1151	1341.64	-1.77	0.18	2.104e-23	1.507e-22
AO090009000171	1	448148	450410	2262	2500.62	-1.79	0.19	1.356e-22	9.256e-22		AO090020000667	6	134651	136446	1795	5240.23	2.33	0.24	2.15e-23	1.539e-22
AO090012000960	4	2491566	2492358	792	1603.97	-1.49	0.16	1.451e-22	9.898e-22		AO090011000766	7	1954072	1957071	2999	4912.39	-2.33	0.24	2.21e-23	1.581e-22
AO090005000501	1	5111572	5113836	2264	246.77	-2.25	0.23	1.496e-22	1.02e-21		AO090020000299	6	1078284	1080447	2163	2008.82	2.24	0.23	2.311e-23	1.652e-22
AO090103000290	8	525630	527544	1914	75.98	-4.27	0.46	1.693e-22	1.154e-21		AO090003001511	2	6139303	6143724	4421	320.33	-4.07	0.42	2.438e-23	1.742e-22
AO090003000729	2	4056034	4057658	1624	31249.5	1.1	0.11	1.705e-22	1.16e-21		AO090026000265	3	4358325	4359876	1551	1508.01	1.8	0.18	2.477e-23	1.768e-22
AO090120000315	5	3511962	3513574	1612	53.4	2.45	0.26	1.755e-22	1.193e-21		AO090005001590	1	2175829	2177003	1174	5671.67	1.52	0.15	2.504e-23	1.787e-22
AO090009000169	1	446840	447639	799	1118.71	1.22	0.13	1.777e-22	1.207e-21		AO090113000143	5	4386045	4386633	588	1253.34	-2.38	0.24	2.587e-23	1.845e-22
AO090001000304	2	776106	777009	903	77516.2	2.5	0.26	1.8e-22	1.222e-21		AO090011000170	7	455235	456267	1032	1009.46	1.62	0.17	2.634e-23	1.877e-22
AO090701000202	5	1801564	1804258	2694	115.21	-2.23	0.23	1.817e-22	1.233e-21		AO090120000045	5	2788382	2790118	1736	1062.14	-1.65	0.17	2.742e-23	1.953e-22
AO090023000303	3	771086	772316	1230	4545.28	-1.01	0.11	1.896e-22	1.285e-21		AO090103000331	8	428323	429158	835	38926.9	1.98	0.2	2.745e-23	1.954e-22
AO090003001360	2	5779586	5781486	1900	682.67	-2.8	0.29	1.933e-22	1.309e-21		AO090020000523	6	478025	479461	1436	1763.94	1.26	0.13	2.823e-23	2.008e-22
AO090009000290	1	769087	771783	2696	757.03	-1.66	0.17	1.984e-22	1.343e-21		AO090113000106	5	4304916	4305918	1002	96.6	-5.4	0.56	2.885e-23	2.051e-22
AO090026000175	3	4624283	4624663	380	1774.23	-1.79	0.19	2.004e-22	1.355e-21		AO090012000825	4	2125299	2128886	3587	1117.35	-1.34	0.14	2.966e-23	2.107e-22
AO090003000631	2	3797823	3798688	865	17949.9	1.85	0.19	2.211e-22	1.494e-21		AO090012000394	4	970662	972619	1957	6345.31	1.33	0.14	3.345e-23	2.375e-22
AO090026000094	3	4851906	4853596	1690	185.62	-1.51	0.16	2.261e-22	1.527e-21		AO090026000736	3	3102678	3103948	1270	319.03	-3.05	0.32	3.402e-23	2.414e-22
AO090003000961	2	4696182	4699203	3021	465.8	1.28	0.13	2.263e-22	1.528e-21		AO090012000788	4	2030928	2031960	1032	819.28	1.41	0.14	3.431e-23	2.432e-22
AO090011000798	7	2035597	2036866	1269	20353.3	1.24	0.13	2.302e-22	1.553e-21		AO090020000634	6	207126	208049	923	1951.29	1.99	0.2	3.477e-23	2.463e-22
AO090120000313	5	3504798	3505978	1180	4393.74	-1.04	0.11	2.332e-22	1.572e-21		AO090103000311	8	475088	476790	1702	4607.58	2.26	0.23	3.626e-23	2.568e-22
AO090005001331	1	2858630	2859207	577	1795.51	-2.41	0.25	2.692e-22	1.813e-21		AO090010000612	8	1787804	1788572	768	1255.2	2.16	0.22	3.702e-23	2.62e-22
AO090003000332	2	2998687	2999602	915	408.21	2.23	0.23	2.957e-22	1.99e-21		AO090023000493	3	1280066	1281252	1186	1770.61	-2.12	0.22	3.912e-23	2.767e-22
AO090001000445	2	1125240	1128777	3537	2744.11	1.62	0.17	3.045e-22	2.047e-21		AO090005001467	1	2550429	2552877	2448	16603.3	2.52	0.26	3.967e-23	2.804e-22
AO090010000321	8	2484329	2485202	873	182.96	-2.01	0.21	3.077e-22	2.068e-21		AO090011000665	7	1716989	1718157	1168	2148.47	-3	0.31	4.117e-23	2.908e-22
AO090023000763	3	1996327	1998186	1859	3742.96	1.13	0.12	3.15e-22	2.115e-21		AO090120000044	5	2786983	2787814	831	265.36	-1.77	0.18	4.349e-23	3.07e-22
AO090038000418	6	2549574	2550055	481	189.8	-3.08	0.33	3.194e-22	2.142e-21		AO090012000680	4	1723711	1725571	1860	6382.97	1.55	0.16	4.558e-23	3.215e-22
AO090011000488	7	1217566	1219324	1758	2954.69	1.27	0.13	3.254e-22	2.181e-21		AO090001000544	2	1420984	1423692	2708	908.56	-2.35	0.24	4.805e-23	3.387e-22
AO090701000623	5	721217	723040	1823	458.05	-1.27	0.13	3.262e-22	2.185e-21		AO090009000216	1	585397	586207	810	4738.84	-2.57	0.27	5.017e-23	3.535e-22
AO090005000556	1	4968279	4969125	846	313.02	2.09	0.22	3.374e-22	2.259e-21		AO090206000078	7	2790843	2791944	1101	12364.5	-2.67	0.28	5.145e-23	3.623e-22
AO090011000294	7	748064	749753	1689	635.31	-2.62	0.28	3.477e-22	2.326e-21		AO090701000596	5	784349	787133	2784	835.58	-2.18	0.22	5.189e-23	3.651e-22
AO090138000151	6	3836246	3838634	2388	88.69	-2.64	0.28	3.536e-22	2.363e-21		AO090103000222	8	706464	707600	1136	170.32	-2.72	0.28	5.569e-23	3.916e-22
AO090001000403	2	1010371	1011297	926	1893.97	-1.7	0.18	3.669e-22	2.451e-21		AO090012000783	4	2016066	2017197	1131	5933	1.4	0.14	5.695e-23	4.002e-22
AO090003000793	2	4218765	4219548	783	126.8	-1.98	0.21	3.824e-22	2.552e-21		AO090038000195	6	3166836	3168347	1511	4434.37	-3.43	0.36	5.773e-23	4.054e-22
AO090701000837	5	169082	169718	636	500.43	-2.98	0.32	3.823e-22	2.552e-21		AO090701000631	5	703985	705278	1293	130.91	-3.88	0.4	5.904e-23	4.144e-22
AO090011000213	7	554449	555472	1023	1038.77	1.88	0.2	3.84e-22	2.561e-21		AO090038000251	6	3005410	3007034	1624	1864.64	-2.12	0.22	6.23e-23	4.369e-22
AO090005000574	1	4935173	4938743	3570	2210.96	-1.54	0.16	3.992e-22	2.66e-21		AO090102000282	4	3756678	3758135	1457	744.92	-2.27	0.24	6.62e-23	4.641e-22
AO090138000134	6	3878864	3879339	475	292.7	1.37	0.14	4.006e-22	2.668e-21		AO090102000071	4	4361925	4363345	1420	1456.15	8.83	0.95	6.741e-23	4.722e-22
AO090102000585	4	2943099	2944069	970	7299.72	-1.19	0.13	4.035e-22	2.686e-21		AO090005000401	1	5402109	5402844	735	342.42	-1.86	0.19	6.941e-23	4.859e-22
AO090010000385	8	2327340	2328856	1516	106.32	-2.87	0.3	4.14e-22	2.754e-21		AO090023000282	3	731179	731951	772	172.03	-2.65	0.28	7.102e-23	4.968e-22
AO090003000625	2	3769517	3772296	2779	1067.39	1.7	0.18	4.146e-22	2.756e-21		AO090023000546	3	1449208	1450649	1441	303.49	-2.64	0.28	7.282e-23	5.091e-22
AO090038000361	6	2724327	2725433	1106	250.48	1.73	0.18	4.369e-22	2.9e-21		AO090001000186	2	425774	426272	498	22994.7	-1.82	0.19	7.733e-23	5.403e-22
AO090020000354	6	947486	949191	1705	1034.96	-1.17	0.12	4.517e-22	2.997e-21		AO090001000163	2	370772	372264	1492	797.12	3.14	0.33	7.826e-23	5.465e-22
AO090009000467	1	1231238	1231829	591	2122.43	-2.44	0.26	4.619e-22	3.063e-21		AO090010000353	8	2412485	2413146	661	302.63	1.88	0.19	8.003e-23	5.585e-22
AO090010000466	8	2147953	2148657	704	2852.3	1.03	0.11	4.678e-22	3.099e-21		AO090003000947	2	4662223	4662849	626	28048.9	1.86	0.19	8.615e-23	6.008e-22
AO090103000430	8	180849	183869	3020	198.72	1.33	0.14	4.953e-22	3.279e-21		AO090701000302	5	1547641	1552643	5002	141.84	2.42	0.25	8.899e-23	6.202e-22
AO090026000494	3	3729524	3731320	1796	63821.1	1.59	0.17	5.131e-22	3.394e-21		AO090026000790	3	2982720	2984423	1703	276.22	-7.8	0.84	9.399e-23	6.547e-22
AO090038000243	6	3022856	3024074	1218	5117.4	-1.37	0.15	5.173e-22	3.42e-21		AO090038000475	6	2389818	2392184	2366	274	-2.08	0.22	1.034e-22	7.199e-22
AO090005000551	1	4982607	4983276	669	473.56	2.02	0.21	5.275e-22	3.485e-21		AO090120000492	5	4008531	4009608	1077	1411.95	-2.68	0.28	1.053e-22	7.325e-22
AO090138000137	6	3866459	3866896	437	210.73	1.35	0.14	5.489e-22	3.622e-21		AO090005000648	1	4709797	4711076	1279	1958.44	2.06	0.21	1.07e-22	7.442e-22
AO090012000711	4	1812115	1814548	2433	1288.92	1.84	0.19	6.064e-22	3.998e-21		AO090026000248	3	4420645	4421851	1206	1472.63	1.35	0.14	1.144e-22	7.947e-22
AO090003000500	2	3432041	3433913	1872	5499.65	-1.93	0.21	6.852e-22	4.507e-21		AO090138000046	6	4098009	4099041	1032	348.63	-2.1	0.22	1.146e-22	7.959e-22
AO090001000565	2	1483288	1484350	1062	621.97	-1.7	0.18	6.997e-22	4.599e-21		AO090012000590	4	1499189	1500080	891	1070.68	1.82	0.19	1.356e-22	9.409e-22
AO090102000321	4	3672778	3674116	1338	100.67	-2.32	0.25	7.123e-22	4.68e-21		AO090003001323	2	5679820	5680545	725	10264.6	1.39	0.14	1.398e-22	9.695e-22
AO090011000396	7	1015034	1016150	1116	108.75	-2.98	0.32	7.276e-22	4.777e-21		AO090011000812	7	2061922	2062922	1000	1576.04	1.49	0.15	1.551e-22	1.075e-21
AO090102000344	4	3588794	3589622	828	783.9	1.98	0.21	7.613e-22	4.996e-21		AO090701000689	5	547610	549042	1432	4588.09	1.73	0.18	1.56e-22	1.081e-21
AO090001000282	2	704561	706072	1511	120.21	2.19	0.23	8.044e-22	5.273e-21		AO090023000927	3	2434910	2437354	2444	258.56	2.76	0.29	1.591e-22	1.102e-21
AO090038000126	6	3349444	3350119	675	974.26	-1.48	0.16	8.189e-22	5.365e-21		AO090001000504	2	1288565	1289315	750	54.8	3.64	0.38	1.601e-22	1.107e-21
AO090102000425	4	3370921	3371488	567	304.91	1.56	0.17	8.59e-22	5.621e-21		AO090026000393	3	4004698	4005151	453	783.59	1.33	0.14	1.608e-22	1.112e-21
AO090023000801	3	2077612	2081255	3643	43370.5	1.13	0.12	9.361e-22	6.122e-21		AO090023000254	3	650675	652303	1628	991.31	-2.05	0.21	1.617e-22	1.117e-21
AO090138000132	6	3893214	3893739	525	1627.44	-1.11	0.12	9.481e-22	6.197e-21		AO090026000154	3	4684287	4686051	1764	72.58	-3.96	0.42	1.743e-22	1.203e-21
AO090003001237	2	5456632	5461336	4704	4852.98	1	0.11	9.687e-22	6.329e-21		AO090005000201	1	5902467	5903022	555	79.25	-4.18	0.44	1.761e-22	1.215e-21
AO090005000483	1	5153424	5154937	1513	373.04	1.25	0.13	1.04e-21	6.783e-21		AO090103000477	8	79502	80063	561	927.15	2.32	0.24	1.771e-22	1.221e-21
AO090023000069	3	185093	186302	1209	363.04	2.12	0.23	1.064e-21	6.937e-21		AO090023000968	3	2553549	2554083	534	745.43	2.03	0.21	1.778e-22	1.225e-21
AO090120000340	5	3595521	3597339	1818	7367.51	1.2	0.13	1.082e-21	7.045e-21		AO090005001529	1	2350599	2351646	1047	565.84	-2.61	0.27	1.837e-22	1.266e-21
AO090701000322	5	1496258	1497615	1357	2717.24	1.5	0.16	1.192e-21	7.758e-21		AO090020000649	6	175958	177214	1256	381.31	-2.67	0.28	1.841e-22	1.267e-21
AO090023000492	3	1276033	1279351	3318	3289.95	1.19	0.13	1.22e-21	7.933e-21		AO090023000165	3	418612	420029	1417	479.01	-1.61	0.17	1.865e-22	1.283e-21
AO090023000068	3	182162	182651	489	211.17	-2.53	0.27	1.221e-21	7.934e-21		AO090009000295	1	785159	786849	1690	5179.35	1.37	0.14	1.902e-22	1.307e-21
AO090005001092	1	3529452	3530995	1543	11435.8	1.17	0.12	1.266e-21	8.218e-21		AO090011000012	7	25244	28910	3666	614.65	-2.88	0.3	1.982e-22	1.362e-21
AO090009000202	1	540637	541744	1107	6839.42	1.21	0.13	1.29e-21	8.368e-21		AO090026000391	3	4007247	4008620	1373	805.13	1.13	0.12	2.011e-22	1.381e-21
AO090005000106	1	6161543	6162250	707	860.36	-1.33	0.14	1.415e-21	9.166e-21		AO090038000368	6	2701261	2703022	1761	1301.82	1.3	0.13	2.026e-22	1.39e-21
AO090003001294	2	5595741	5597020	1279	580.84	1.35	0.14	1.457e-21	9.432e-21		AO090102000512	4	3131475	3134430	2955	1195.81	1.26	0.13	2.052e-22	1.407e-21
AO090023000697	3	1842459	1844102	1643	14040.6	-1.76	0.19	1.584e-21	1.024e-20		AO090011000642	7	1657377	1659696	2319	14305.7	-1.31	0.14	2.077e-22	1.423e-21
AO090010000096	8	3167257	3168776	1519	495.38	-1.75	0.19	1.622e-21	1.049e-20		AO090103000117	8	963749	965308	1559	666.11	-1.74	0.18	2.123e-22	1.454e-21
AO090009000087	1	250929	251408	479	88.18	2.72	0.29	1.676e-21	1.082e-20		AO090005000719	1	4513484	4515211	1727	2059.72	1.44	0.15	2.188e-22	1.498e-21
AO090023000745	3	1950962	1952195	1233	910.21	1.14	0.12	1.678e-21	1.083e-20		AO090020000591	6	326575	328000	1425	609.04	1.25	0.13	2.236e-22	1.53e-21
AO090003001227	2	5438170	5439066	896	14744.9	-1.12	0.12	1.916e-21	1.236e-20		AO090003000208	2	2647775	2649135	1360	29261.2	-3.33	0.35	2.256e-22	1.542e-21
AO090020000119	6	1511740	1516825	5085	6543.9	1.38	0.15	2.005e-21	1.293e-20		AO090011000054	7	172062	173574	1512	380.36	-2.48	0.26	2.299e-22	1.571e-21
AO090003000756	2	4124205	4127032	2827	2137.8	1.06	0.11	2.024e-21	1.304e-20		AO090023000116	3	290423	291110	687	1184.17	2.3	0.24	2.308e-22	1.576e-21
AO090026000192	3	4571630	4572551	921	4880.75	1.3	0.14	2.159e-21	1.39e-20		AO090102000517	4	3117707	3118785	1078	3753.23	1.6	0.17	2.4e-22	1.638e-21
AO090005000307	1	5627917	5629068	1151	192.61	-1.96	0.21	2.276e-21	1.464e-20		AO090023000965	3	2545650	2547831	2181	819.67	1.41	0.15	2.403e-22	1.639e-21
AO090011000845	7	2162100	2163639	1539	5177.14	1.05	0.11	2.593e-21	1.664e-20		AO090005000583	1	4899389	4899857	468	80621.2	7.96	0.86	2.508e-22	1.71e-21
AO090001000321	2	817271	819368	2097	263.69	-1.39	0.15	2.657e-21	1.704e-20		AO090701000539	5	926964	928726	1762	680.88	2.87	0.3	2.614e-22	1.78e-21
AO090005000987	1	3789730	3790740	1010	371.67	-1.45	0.16	2.817e-21	1.806e-20		AO090020000504	6	539680	540080	400	878.71	-2.02	0.21	2.955e-22	2.011e-21
AO090023000066	3	179395	180157	762	390.35	-1.55	0.17	3.007e-21	1.926e-20		AO090011000774	7	1970192	1971181	989	41718	1.43	0.15	3.013e-22	2.05e-21
AO090001000359	2	899804	901507	1703	156.77	2.14	0.23	3.066e-21	1.962e-20		AO090005000339	1	5564022	5564844	822	96.07	-4.28	0.45	3.156e-22	2.145e-21
AO090038000049	6	3540048	3540499	451	95.39	-2.77	0.3	3.267e-21	2.088e-20		AO090020000349	6	960233	962424	2191	5019.85	1.68	0.18	3.154e-22	2.145e-21
AO090005000547	1	4991081	4991543	462	74.54	-2.46	0.27	3.306e-21	2.112e-20		AO090012000483	4	1202846	1203248	402	145.12	2.35	0.25	3.313e-22	2.25e-21
AO090701000645	5	664262	666161	1899	217.58	3.08	0.33	3.322e-21	2.121e-20		AO090012000234	4	577384	578006	622	4828	-1.65	0.17	3.332e-22	2.261e-21
AO090038000471	6	2400020	2405022	5002	121.3	-2.34	0.25	3.715e-21	2.371e-20		AO090102000625	4	2840957	2842564	1607	18169.2	1.86	0.2	4.09e-22	2.774e-21
AO090038000465	6	2426598	2427112	514	998	1.81	0.2	3.74e-21	2.386e-20		AO090020000290	6	1096539	1099065	2526	3062.24	-1.77	0.19	4.195e-22	2.843e-21
AO090124000051	5	2562899	2564277	1378	2700.15	-1.03	0.11	3.772e-21	2.404e-20		AO090023000185	3	459233	462480	3247	116.02	-2.88	0.31	4.202e-22	2.846e-21
AO090011000363	7	936669	938106	1437	1736.68	-1.02	0.11	3.811e-21	2.426e-20		AO090003000380	2	3110015	3112118	2103	148.11	-3.89	0.41	4.353e-22	2.947e-21
AO090003001343	2	5731066	5733796	2730	1062.55	-1.23	0.13	3.88e-21	2.469e-20		AO090012000267	4	654590	657622	3032	3859.26	-1.38	0.14	4.801e-22	3.248e-21
AO090701000391	5	1307248	1312139	4891	330.79	-1.34	0.15	3.986e-21	2.535e-20		AO090023000937	3	2470689	2472178	1489	8929.05	1.5	0.16	4.982e-22	3.369e-21
AO090003000648	2	3829818	3830658	840	12411.4	1.19	0.13	4.011e-21	2.55e-20		AO090005001150	1	3372544	3374023	1479	8984.94	1.56	0.16	5.21e-22	3.52e-21
AO090102000439	4	3345157	3345632	475	391.72	1.47	0.16	4.043e-21	2.569e-20		AO090003000349	2	3035510	3036953	1443	338.07	-4.22	0.45	5.214e-22	3.521e-21
AO090005001140	1	3396212	3402138	5926	123.09	-2.24	0.24	4.159e-21	2.641e-20		AO090011000230	7	588648	590157	1509	7772.77	2.52	0.27	5.266e-22	3.554e-21
AO090012000948	4	2466555	2467966	1411	29756.6	1.01	0.11	4.23e-21	2.685e-20		AO090009000433	1	1136632	1137391	759	429.96	-1.52	0.16	5.738e-22	3.871e-21
AO090020000259	6	1171204	1174095	2891	443.18	1.69	0.18	4.284e-21	2.717e-20		AO090012000116	4	286591	287471	880	1845.14	-2.74	0.29	5.763e-22	3.885e-21
AO090011000119	7	338251	339073	822	1009.9	-2.04	0.22	4.341e-21	2.752e-20		AO090005000915	1	3980747	3981634	887	412.65	-2.38	0.25	5.998e-22	4.041e-21
AO090020000514	6	510708	511497	789	584.38	1.57	0.17	4.383e-21	2.777e-20		AO090003000312	2	2941022	2941853	831	339.09	1.94	0.21	6.646e-22	4.474e-21
AO090012000800	4	2055996	2056869	873	1555.78	-1.56	0.17	4.493e-21	2.845e-20		AO090005000593	1	4871576	4873219	1643	428.21	-3.35	0.36	7.08e-22	4.764e-21
AO090005001278	1	3029430	3031445	2015	407.06	-1.5	0.16	4.56e-21	2.886e-20		AO090020000119	6	1511740	1516825	5085	8007.06	1.73	0.18	7.422e-22	4.991e-21
AO090023000626	3	1641944	1645822	3878	2994.1	1.95	0.21	4.637e-21	2.933e-20		AO090009000535	1	1424377	1425676	1299	111.6	-6.34	0.68	7.441e-22	5.001e-21
AO090012000975	4	2528704	2529076	372	1030.61	1.75	0.19	4.672e-21	2.954e-20		AO090103000056	8	1104256	1105617	1361	59803.8	1.05	0.11	7.722e-22	5.187e-21
AO090103000329	8	434033	435074	1041	1589.57	1.31	0.14	4.686e-21	2.961e-20		AO090701000398	5	1292209	1293668	1459	9346.37	-1.77	0.19	7.837e-22	5.26e-21
AO090701000557	5	879921	881124	1203	65725.3	1.71	0.18	4.7e-21	2.968e-20		AO090010000635	8	1728708	1729707	999	210	-2.8	0.3	7.875e-22	5.283e-21
AO090001000612	2	1602178	1605089	2911	309.94	-1.43	0.16	5.324e-21	3.349e-20		AO090103000121	8	942735	946489	3754	201.39	-3.11	0.33	7.989e-22	5.356e-21
AO090005000476	1	5177363	5179310	1947	153.64	-1.63	0.18	5.458e-21	3.43e-20		AO090023000010	3	26594	27755	1161	211.67	-3.44	0.37	8.169e-22	5.473e-21
AO090026000452	3	3846340	3847910	1570	5447.99	1.11	0.12	5.489e-21	3.448e-20		AO090001000020	2	48189	49973	1784	122.19	-4.6	0.49	8.296e-22	5.555e-21
AO090001000224	2	540351	541810	1459	20358.5	1.43	0.16	5.589e-21	3.506e-20		AO090102000321	4	3672778	3674116	1338	312.02	-2.56	0.27	8.463e-22	5.664e-21
AO090011000537	7	1345055	1345679	624	2247.77	-1.02	0.11	5.711e-21	3.581e-20		AO090003001146	2	5226095	5226872	777	6793.86	1.52	0.16	8.588e-22	5.744e-21
AO090003000442	2	3268526	3269045	519	1907.48	-1.02	0.11	5.868e-21	3.678e-20		AO090001000252	2	616104	617398	1294	138.05	-2.88	0.31	8.597e-22	5.746e-21
AO090005000093	1	6195703	6197641	1938	5174.79	-1.36	0.15	6.063e-21	3.798e-20		AO090701000404	5	1275001	1277257	2256	462.56	-1.89	0.2	8.645e-22	5.775e-21
AO090010000483	8	2098125	2100651	2526	21238.9	-2.4	0.26	6.258e-21	3.918e-20		AO090009000002	1	9682	14221	4539	562.85	7.64	0.84	9.282e-22	6.197e-21
AO090023000292	3	749088	750451	1363	87.52	-3.29	0.36	6.281e-21	3.93e-20		AO090005000972	1	3823868	3826018	2150	154.46	-3.13	0.34	9.386e-22	6.262e-21
AO090005000532	1	5031887	5034083	2196	335.89	-2.39	0.26	6.321e-21	3.953e-20		AO090009000702	1	1872077	1873874	1797	3354.19	1.51	0.16	9.4e-22	6.268e-21
AO090012000246	4	603488	604107	619	1495.45	1.13	0.12	6.489e-21	4.056e-20		AO090102000296	4	3727126	3728476	1350	239.31	-2.53	0.27	9.491e-22	6.325e-21
AO090009000188	1	504154	505173	1019	2977.18	1.47	0.16	6.849e-21	4.277e-20		AO090026000613	3	3419845	3422529	2684	7599.85	1.27	0.13	9.878e-22	6.579e-21
AO090005000121	1	6116727	6119560	2833	344.44	-1.71	0.19	6.945e-21	4.334e-20		AO090009000592	1	1574993	1575431	438	1775.5	-3.01	0.32	1.003e-21	6.676e-21
AO090009000381	1	1018825	1020707	1882	780.09	-2.02	0.22	7.142e-21	4.449e-20		AO090102000378	4	3491869	3493711	1842	614.29	2.55	0.27	1.01e-21	6.716e-21
AO090138000040	6	4111992	4113391	1399	248.92	-1.26	0.14	7.138e-21	4.449e-20		AO090005000896	1	4029027	4030689	1662	781.26	1.27	0.13	1.065e-21	7.08e-21
AO090003000055	2	2234548	2236118	1570	210460	1.2	0.13	7.166e-21	4.462e-20		AO090010000016	8	3354392	3356796	2404	1371.3	-4.42	0.47	1.104e-21	7.336e-21
AO090011000223	7	571515	573162	1647	124.08	-1.89	0.21	7.52e-21	4.678e-20		AO090003001339	2	5718795	5720618	1823	498.28	1.53	0.16	1.135e-21	7.534e-21
AO090009000553	1	1457183	1457853	670	1787.16	1.54	0.17	7.695e-21	4.779e-20		AO090011000255	7	652193	653662	1469	507.96	-1.73	0.18	1.171e-21	7.77e-21
AO090701000416	5	1245839	1248252	2413	237.23	-1.46	0.16	7.886e-21	4.895e-20		AO090102000065	4	4377099	4378767	1668	6102.03	1.63	0.17	1.214e-21	8.055e-21
AO090010000206	8	2854818	2856605	1787	543.65	-1	0.11	7.975e-21	4.948e-20		AO090010000754	8	1434359	1434980	621	1565.6	1.24	0.13	1.249e-21	8.281e-21
AO090005001646	1	2028268	2030595	2327	40137	1.84	0.2	8.079e-21	5.009e-20		AO090012000915	4	2365061	2365761	700	2184.71	1.82	0.19	1.255e-21	8.314e-21
AO090701000536	5	933992	935072	1080	8421.79	-2.59	0.28	8.226e-21	5.098e-20		AO090003000725	2	4045179	4046453	1274	85933.1	1.5	0.16	1.35e-21	8.935e-21
AO090011000182	7	482274	482943	669	202.49	-2.65	0.29	8.431e-21	5.219e-20		AO090011000551	7	1391242	1392568	1326	578.79	1.28	0.14	1.36e-21	8.999e-21
AO090102000135	4	4197682	4199403	1721	3484.37	2.33	0.25	8.49e-21	5.253e-20		AO090023000219	3	549875	551359	1484	511.12	1.46	0.16	1.419e-21	9.38e-21
AO090102000205	4	4008730	4010831	2101	9565.86	1.38	0.15	8.839e-21	5.466e-20		AO090005000892	1	4039372	4041798	2426	11553.8	1.58	0.17	1.54e-21	1.017e-20
AO090005000026	1	6357717	6358773	1056	149.57	-1.62	0.18	9.908e-21	6.117e-20		AO090038000001	6	3655790	3659284	3494	342.23	-1.65	0.18	1.591e-21	1.051e-20
AO090120000435	5	3852004	3852493	489	342.65	1.89	0.21	1.109e-20	6.842e-20		AO090023000523	3	1372950	1374253	1303	134.78	-3.44	0.37	1.63e-21	1.076e-20
AO090103000230	8	671578	672019	441	62.03	-4.2	0.48	1.181e-20	7.273e-20		AO090701000829	5	194388	195183	795	51.16	3.74	0.4	1.741e-21	1.148e-20
AO090701000451	5	1155286	1156391	1105	91.55	1.73	0.19	1.181e-20	7.273e-20		AO090701000145	5	1952449	1953580	1131	733.74	1.72	0.18	1.757e-21	1.158e-20
AO090023000632	3	1662137	1662795	658	3103.59	1.01	0.11	1.213e-20	7.465e-20		AO090003000616	2	3750322	3751447	1125	653.12	1.8	0.19	1.759e-21	1.159e-20
AO090011000892	7	2280658	2282911	2253	9840.53	1.69	0.19	1.263e-20	7.767e-20		AO090003001456	2	5998335	5999475	1140	533.47	-2.31	0.25	1.77e-21	1.166e-20
AO090124000039	5	2587187	2590336	3149	139.38	-1.76	0.19	1.267e-20	7.786e-20		AO090005001049	1	3636089	3636961	872	196.8	-2.89	0.31	1.846e-21	1.215e-20
AO090012000725	4	1848076	1850180	2104	1245.3	2.24	0.25	1.291e-20	7.935e-20		AO090120000354	5	3631246	3632487	1241	1119.79	1.6	0.17	1.847e-21	1.215e-20
AO090005000231	1	5824072	5824646	574	103.13	-3.33	0.37	1.295e-20	7.951e-20		AO090005000931	1	3935759	3937845	2086	125.95	-2.43	0.26	1.876e-21	1.233e-20
AO090003001440	2	5963354	5965290	1936	65.82	-3.15	0.35	1.353e-20	8.299e-20		AO090102000042	4	4439491	4440439	948	373.75	-2.5	0.27	1.99e-21	1.307e-20
AO090023000722	3	1903557	1904812	1255	385.08	-1.51	0.17	1.356e-20	8.311e-20		AO090701000433	5	1203071	1203485	414	166.98	5.21	0.56	2.081e-21	1.367e-20
AO090010000345	8	2436260	2438108	1848	276.17	-2.28	0.25	1.375e-20	8.422e-20		AO090001000321	2	817271	819368	2097	355.94	-1.82	0.2	2.099e-21	1.378e-20
AO090005000029	1	6352303	6353098	795	112.02	-1.76	0.19	1.449e-20	8.871e-20		AO090009000617	1	1644906	1646492	1586	16720.4	1.52	0.16	2.101e-21	1.378e-20
AO090011000070	7	208119	209757	1638	146.67	-1.89	0.21	1.519e-20	9.293e-20		AO090701000273	5	1621931	1623768	1837	2267.44	1.38	0.15	2.158e-21	1.414e-20
AO090023000386	3	996580	997135	555	60.23	-4.05	0.46	1.591e-20	9.728e-20		AO090020000241	6	1212660	1213761	1101	1256.45	1.39	0.15	2.312e-21	1.514e-20
AO090026000718	3	3159639	3160631	992	170.37	2.8	0.31	1.624e-20	9.926e-20		AO090003001143	2	5220369	5221696	1327	1814.34	-2.46	0.27	2.371e-21	1.552e-20
AO090003001309	2	5641547	5642304	757	107.55	2.36	0.26	1.636e-20	9.995e-20		AO090005000253	1	5761623	5762439	816	138.26	-6.37	0.7	2.394e-21	1.566e-20
AO090012000607	4	1546015	1548935	2920	396.06	-1.18	0.13	1.681e-20	1.026e-19		AO090003001215	2	5414448	5416266	1818	8608.73	3.1	0.34	2.47e-21	1.615e-20
AO090038000500	6	2328413	2329015	602	181.07	-2.17	0.24	1.764e-20	1.076e-19		AO090020000189	6	1349455	1350406	951	144.37	-2.91	0.32	2.556e-21	1.67e-20
AO090010000367	8	2374844	2377613	2769	818.3	-2.74	0.3	1.872e-20	1.14e-19		AO090038000427	6	2531303	2531951	648	1769.26	2.33	0.25	2.594e-21	1.694e-20
AO090102000042	4	4439491	4440439	948	297.23	-1.43	0.16	1.957e-20	1.192e-19		AO090005000251	1	5763858	5766417	2559	93.37	-5.23	0.57	2.668e-21	1.741e-20
AO090023000316	3	803983	805764	1781	2580.22	-1.62	0.18	2.035e-20	1.238e-19		AO090026000542	3	3600231	3601869	1638	3312.19	1.97	0.21	2.782e-21	1.814e-20
AO090023000110	3	279719	281375	1656	1901.04	-1.31	0.14	2.32e-20	1.407e-19		AO090102000556	4	3011869	3013445	1576	1968.58	1.3	0.14	2.849e-21	1.858e-20
AO090001000670	2	1760343	1761163	820	2821.04	-1.14	0.13	2.486e-20	1.507e-19		AO090001000525	2	1367071	1369474	2403	1947.21	1.69	0.18	2.898e-21	1.888e-20
AO090023000972	3	2566852	2567863	1011	5146.54	-1.3	0.14	2.544e-20	1.541e-19		AO090012000773	4	1988467	1992519	4052	7205.65	1.33	0.14	3.266e-21	2.127e-20
AO090001000161	2	365130	366882	1752	289.5	1.95	0.22	2.879e-20	1.74e-19		AO090103000235	8	661260	664067	2807	229.68	-2.56	0.28	3.354e-21	2.182e-20
AO090012000344	4	843546	843952	406	88.17	2.45	0.27	2.984e-20	1.802e-19		AO090701000235	5	1720426	1722032	1606	2308.09	1.62	0.17	3.372e-21	2.193e-20
AO090005001473	1	2533622	2535029	1407	2003.41	-2.61	0.29	3.284e-20	1.979e-19		AO090005000905	1	4003025	4006329	3304	607.94	-2.2	0.24	3.621e-21	2.353e-20
AO090701000642	5	676520	679178	2658	118.8	-1.68	0.19	3.283e-20	1.979e-19		AO090005000129	1	6096943	6097684	741	745.84	1.99	0.22	3.67e-21	2.384e-20
AO090701000639	5	687888	690138	2250	174.85	1.55	0.17	3.312e-20	1.995e-19		AO090001000262	2	638747	655090	16343	124.68	-3.9	0.43	3.971e-21	2.578e-20
AO090026000573	3	3518622	3519398	776	193.26	1.6	0.18	3.477e-20	2.092e-19		AO090138000120	6	3938605	3939892	1287	89.39	-3.74	0.41	4.003e-21	2.598e-20
AO090026000640	3	3354454	3355311	857	258.07	-1.16	0.13	3.521e-20	2.118e-19		AO090005001291	1	2965488	2967173	1685	7066.08	1.5	0.16	4.053e-21	2.628e-20
AO090003001548	2	6232582	6233326	744	302.4	-2.18	0.24	3.709e-20	2.23e-19		AO090012000888	4	2301906	2302770	864	362.93	-2.35	0.26	4.199e-21	2.721e-20
AO090012000170	4	405287	407077	1790	804.46	-1.55	0.17	3.95e-20	2.372e-19		AO090003000191	2	2603423	2604480	1057	362.45	-1.52	0.16	4.233e-21	2.742e-20
AO090003000780	2	4191642	4192073	431	503.9	1.89	0.21	4.262e-20	2.555e-19		AO090003000254	2	2771207	2772888	1681	354.63	-3.3	0.36	4.343e-21	2.812e-20
AO090026000316	3	4227953	4230023	2070	1626.79	-1.16	0.13	4.409e-20	2.64e-19		AO090102000377	4	3495864	3496479	615	59.3	3.31	0.36	4.372e-21	2.829e-20
AO090011000750	7	1919764	1920535	771	182.63	-1.43	0.16	4.425e-20	2.648e-19		AO090005000987	1	3789730	3790740	1010	1683.02	-4.23	0.46	4.449e-21	2.877e-20
AO090001000385	2	969148	970922	1774	300.11	-1.7	0.19	4.464e-20	2.671e-19		AO090020000055	6	1671972	1673221	1249	1396.02	1.54	0.17	4.456e-21	2.88e-20
AO090009000134	1	364365	365618	1253	679.66	2.66	0.3	5.053e-20	3.017e-19		AO090005000921	1	3963332	3964350	1018	82.83	-3.25	0.36	4.517e-21	2.917e-20
AO090005000942	1	3907558	3908406	848	868.55	-2.01	0.22	5.198e-20	3.101e-19		AO090102000567	4	2986912	2987947	1035	2191.84	2.21	0.24	4.647e-21	3e-20
AO090010000399	8	2307580	2308316	736	82.82	-2.79	0.31	5.519e-20	3.288e-19		AO090003000430	2	3228391	3228917	526	406.12	-1.95	0.21	4.799e-21	3.096e-20
AO090010000360	8	2391041	2391604	563	34.33	3.51	0.4	5.72e-20	3.404e-19		AO090005000765	1	4381539	4382511	972	772.6	-2.56	0.28	4.882e-21	3.148e-20
AO090011000334	7	852926	853649	723	56.37	-3.37	0.38	5.837e-20	3.47e-19		AO090005001242	1	3129354	3130255	901	389.08	-1.77	0.19	4.903e-21	3.159e-20
AO090023000401	3	1031379	1032605	1226	213.11	-1.39	0.15	5.837e-20	3.47e-19		AO090003001096	2	5074315	5075566	1251	7874.64	7.45	0.83	5.004e-21	3.221e-20
AO090011000854	7	2180830	2184996	4166	7099.3	-1.84	0.21	5.894e-20	3.503e-19		AO090701000293	5	1569507	1572798	3291	747.63	3.2	0.35	5.002e-21	3.221e-20
AO090001000159	2	361638	362496	858	324	1.89	0.21	5.922e-20	3.517e-19		AO090011000838	7	2132591	2139573	6982	10566.9	2.12	0.23	5.048e-21	3.247e-20
AO090206r00001	7	2922896	2924695	1799	12809.5	1.67	0.19	6.666e-20	3.955e-19		AO090005000897	1	4028170	4028816	646	2449.19	-1.32	0.14	5.182e-21	3.331e-20
AO090010000176	8	2947434	2948525	1091	81.09	-3.3	0.37	6.715e-20	3.982e-19		AO090012000652	4	1659718	1660123	405	2266.33	1.73	0.19	5.21e-21	3.347e-20
AO090010000742	8	1469325	1473191	3866	224.59	-3.4	0.39	6.763e-20	4.009e-19		AO090701000815	5	235785	237000	1215	666.32	2.2	0.24	5.401e-21	3.468e-20
AO090011000046	7	152333	159735	7402	27236	-2.1	0.23	6.794e-20	4.025e-19		AO090026000798	3	2955919	2959564	3645	559.23	-2.84	0.31	5.525e-21	3.546e-20
AO090001000564	2	1480575	1482669	2094	2412.49	-1.87	0.21	7.302e-20	4.324e-19		AO090005001383	1	2753734	2755285	1551	620.94	-1.89	0.2	5.618e-21	3.601e-20
AO090003000540	2	3530381	3531686	1305	2056.82	1.06	0.12	7.344e-20	4.347e-19		AO090701000417	5	1242794	1244723	1929	362.86	-3.08	0.34	5.615e-21	3.601e-20
AO090005000684	1	4629699	4631547	1848	427.12	-1.47	0.17	7.577e-20	4.482e-19		AO090026000067	3	4949470	4950413	943	361.65	-2.14	0.23	5.868e-21	3.759e-20
AO090003000720	2	4033805	4034858	1053	291.9	1.5	0.17	8.419e-20	4.967e-19		AO090020000259	6	1171204	1174095	2891	812.71	-3.1	0.34	5.927e-21	3.795e-20
AO090003001427	2	5937613	5938881	1268	65.1	-2.97	0.34	9.1e-20	5.364e-19		AO090001000203	2	471847	473056	1209	1305.88	-2.37	0.26	6.333e-21	4.052e-20
AO090005000075	1	6229339	6231268	1929	812.43	-1	0.11	9.253e-20	5.451e-19		AO090038000596	6	2040199	2043496	3297	1717.09	1.38	0.15	6.792e-21	4.343e-20
AO090010000642	8	1711295	1713632	2337	1873.42	2.25	0.25	9.288e-20	5.466e-19		AO090701000047	5	2223761	2226846	3085	3053.42	1.12	0.12	6.892e-21	4.405e-20
AO090026000202	3	4538378	4539944	1566	466.17	1.13	0.13	9.867e-20	5.804e-19		AO090005001399	1	2715518	2716607	1089	489.46	1.78	0.19	6.972e-21	4.453e-20
AO090005000812	1	4242340	4243126	786	16504.8	1.85	0.21	1.033e-19	6.066e-19		AO090038000333	6	2784685	2785399	714	3995.85	1.67	0.18	7.202e-21	4.598e-20
AO090026000507	3	3695876	3696939	1063	237.33	1.97	0.22	1.04e-19	6.103e-19		AO090005000081	1	6220000	6220808	808	185.76	-3.81	0.42	7.413e-21	4.73e-20
AO090005001117	1	3450657	3451906	1249	22311.1	1.56	0.18	1.07e-19	6.275e-19		AO090023000977	3	2583567	2584961	1394	9426.55	1.01	0.11	7.463e-21	4.759e-20
AO090701000458	5	1140075	1140654	579	89.42	-2.33	0.26	1.083e-19	6.349e-19		AO090011000852	7	2176222	2177718	1496	103.72	-3.74	0.41	7.754e-21	4.942e-20
AO090023000034	3	89924	90947	1023	254.69	2.01	0.23	1.132e-19	6.623e-19		AO090001000555	2	1452923	1454299	1376	6466.76	-2.06	0.22	7.806e-21	4.972e-20
AO090003000808	2	4250308	4251752	1444	4291.42	-1.55	0.17	1.162e-19	6.793e-19		AO090701000067	5	2172659	2174819	2160	1145.13	1.74	0.19	7.869e-21	5.009e-20
AO090124000067	5	2515131	2516898	1767	102.51	-2.49	0.28	1.164e-19	6.8e-19		AO090003001361	2	5783613	5785344	1731	16773.2	-6.6	0.73	8.183e-21	5.206e-20
AO090012000365	4	899697	900900	1203	134.81	-2.48	0.28	1.313e-19	7.66e-19		AO090026000307	3	4254336	4257767	3431	191.67	-2.72	0.3	8.187e-21	5.206e-20
AO090701000286	5	1590315	1591821	1506	504.63	-1.16	0.13	1.38e-19	8.042e-19		AO090103000021	8	1212905	1214480	1575	1545.35	-1	0.11	8.212e-21	5.218e-20
AO090005000805	1	4261531	4262725	1194	311.09	1.22	0.14	1.42e-19	8.266e-19		AO090206000131	7	2918841	2922536	3695	105.16	2.89	0.32	8.657e-21	5.498e-20
AO090009000579	1	1539125	1540865	1740	448.46	-1.74	0.2	1.457e-19	8.477e-19		AO090102000426	4	3367922	3369052	1130	49.13	4.41	0.49	8.815e-21	5.596e-20
AO090011000692	7	1783450	1784950	1500	4357.87	-1.15	0.13	1.467e-19	8.532e-19		AO090038000623	6	1968853	1971795	2942	5932.63	1.16	0.13	8.839e-21	5.607e-20
AO090701000013	5	2322628	2324058	1430	51455.4	-1.25	0.14	1.682e-19	9.775e-19		AO090001000608	2	1588149	1592652	4503	144.92	-5.1	0.56	9.411e-21	5.967e-20
AO090020000659	6	150480	151267	787	1331.75	-2.37	0.27	1.694e-19	9.837e-19		AO090023000528	3	1386058	1400399	14341	4822.99	-2.64	0.29	9.527e-21	6.037e-20
AO090023000883	3	2312558	2313466	908	19220.1	1.65	0.19	1.75e-19	1.016e-18		AO090701000548	5	901064	902724	1660	281.71	-3.8	0.42	9.795e-21	6.203e-20
AO090701000115	5	2043479	2048200	4721	1004.03	1.04	0.12	1.79e-19	1.038e-18		AO090003001389	2	5848823	5850362	1539	2598.14	-2.15	0.24	1.046e-20	6.623e-20
AO090010000354	8	2404758	2405774	1016	833.65	1.74	0.2	1.848e-19	1.071e-18		AO090023000490	3	1267458	1270900	3442	727.53	-4.59	0.51	1.047e-20	6.623e-20
AO090010000683	8	1622758	1623862	1104	117.88	-2.22	0.25	1.852e-19	1.073e-18		AO090005000728	1	4478327	4478903	576	2814.5	1.26	0.14	1.053e-20	6.656e-20
AO090010000040	8	3301992	3303278	1286	100.78	-1.85	0.21	1.956e-19	1.132e-18		AO090005001601	1	2134477	2135625	1148	37668.5	2.27	0.25	1.102e-20	6.962e-20
AO090020000683	6	93127	93958	831	171.62	-1.44	0.16	1.996e-19	1.154e-18		AO090023000143	3	366303	367115	812	209.9	-3.38	0.37	1.108e-20	7e-20
AO090038000441	6	2494328	2495757	1429	16622.8	1.18	0.13	2.184e-19	1.261e-18		AO090009000436	1	1140116	1141218	1102	591.74	1.59	0.17	1.175e-20	7.418e-20
AO090012000080	4	186699	188195	1496	192.22	-2.53	0.29	2.232e-19	1.288e-18		AO090009000635	1	1693782	1695877	2095	988.67	-2.1	0.23	1.186e-20	7.481e-20
AO090701000748	5	390116	391097	981	1289.67	-1.32	0.15	2.278e-19	1.314e-18		AO090102000599	4	2902687	2904965	2278	3778.15	1.8	0.2	1.212e-20	7.641e-20
AO090009000071	1	201611	211057	9446	406.28	-1.08	0.12	2.291e-19	1.321e-18		AO090020000391	6	843748	846247	2499	83.64	-4.35	0.48	1.24e-20	7.815e-20
AO090005001313	1	2911052	2914661	3609	280.44	1.14	0.13	2.312e-19	1.332e-18		AO090009000232	1	622793	623397	604	1007.63	1.64	0.18	1.295e-20	8.157e-20
AO090005001364	1	2787062	2788052	990	3330.16	-1.78	0.2	2.347e-19	1.351e-18		AO090005001504	1	2438025	2438814	789	1957.24	1.13	0.12	1.332e-20	8.381e-20
AO090005000958	1	3870841	3872322	1481	199.46	-1.89	0.22	2.416e-19	1.39e-18		AO090012000606	4	1542865	1544576	1711	139.09	-2.44	0.27	1.338e-20	8.416e-20
AO090005001491	1	2476576	2477470	894	3105.68	-1.91	0.22	2.438e-19	1.402e-18		AO090001000384	2	967336	968172	836	7175.25	-4.56	0.5	1.347e-20	8.465e-20
AO090003000795	2	4221287	4222436	1149	404.69	-1.31	0.15	2.483e-19	1.426e-18		AO090102000114	4	4244378	4245099	721	644.72	1.74	0.19	1.389e-20	8.725e-20
AO090010000621	8	1764726	1765875	1149	131.53	-2.65	0.3	2.524e-19	1.449e-18		AO090026000270	3	4348524	4349737	1213	722.3	1.26	0.14	1.401e-20	8.797e-20
AO090010000728	8	1511739	1513059	1320	199.74	1.23	0.14	2.584e-19	1.483e-18		AO090012000475	4	1182948	1183937	989	1613.4	1.8	0.2	1.448e-20	9.087e-20
AO090005001642	1	2041338	2042658	1320	12320	-1.21	0.14	2.597e-19	1.49e-18		AO090026000757	3	3057361	3058275	914	88.5	-4.11	0.46	1.465e-20	9.189e-20
AO090005000456	1	5236847	5238286	1439	32964.5	1.59	0.18	2.622e-19	1.503e-18		AO090009000354	1	945663	947044	1381	413.31	-2.56	0.28	1.535e-20	9.625e-20
AO090701000582	5	811195	812461	1266	904.71	-1.19	0.14	2.624e-19	1.504e-18		AO090701000542	5	913503	916793	3290	78.14	-5.43	0.6	1.573e-20	9.857e-20
AO090023000653	3	1723171	1723723	552	272.01	1.08	0.12	3.06e-19	1.751e-18		AO090124000063	5	2524700	2526431	1731	120.58	-5.86	0.65	1.58e-20	9.893e-20
AO090023000035	3	92046	93000	954	186.11	1.22	0.14	3.071e-19	1.756e-18		AO090701000381	5	1330533	1331122	589	2171.65	-1.05	0.11	1.582e-20	9.901e-20
AO090003000107	2	2386180	2387242	1062	2073.15	1.11	0.13	3.281e-19	1.874e-18		AO090005000428	1	5324044	5327430	3386	61424.4	1.41	0.15	1.593e-20	9.963e-20
AO090003000853	2	4410246	4410836	590	1728.04	-1.4	0.16	3.313e-19	1.891e-18		AO090023000991	3	2622344	2624055	1711	5169.68	1.56	0.17	1.702e-20	1.064e-19
AO090012000183	4	452411	454619	2208	2688.89	-1.43	0.16	3.323e-19	1.896e-18		AO090003001180	2	5309642	5310620	978	392.63	2.21	0.24	1.753e-20	1.095e-19
AO090120000183	5	3146073	3146666	593	15885	1.62	0.19	3.383e-19	1.929e-18		AO090102000499	4	3173551	3174538	987	351.06	1.66	0.18	1.786e-20	1.115e-19
AO090023000063	3	171409	173352	1943	96.81	-2.01	0.23	3.463e-19	1.973e-18		AO090005000639	1	4743500	4745303	1803	9431.53	-1.19	0.13	1.833e-20	1.144e-19
AO090005000995	1	3762449	3763790	1341	9115.75	1.63	0.19	3.533e-19	2.01e-18		AO090003000752	2	4114203	4115211	1008	4617.8	-3.09	0.34	1.863e-20	1.162e-19
AO090011000012	7	25244	28910	3666	154.99	-2.01	0.23	3.536e-19	2.01e-18		AO090011000578	7	1464697	1465526	829	6870.11	1.5	0.16	1.913e-20	1.192e-19
AO090701000422	5	1228426	1229949	1523	411.16	-1.21	0.14	3.984e-19	2.263e-18		AO090012000436	4	1088554	1090227	1673	22271.1	1.76	0.19	1.959e-20	1.221e-19
AO090023000611	3	1607232	1607846	614	859.53	1.64	0.19	4.01e-19	2.277e-18		AO090020000192	6	1336623	1338346	1723	989.87	1.67	0.18	1.983e-20	1.234e-19
AO090010000018	8	3353141	3353616	475	19892	1.69	0.19	4.166e-19	2.364e-18		AO090102000581	4	2955312	2960061	4749	13067.9	-1.61	0.18	1.983e-20	1.234e-19
AO090023000392	3	1005757	1007738	1981	194.31	-2.43	0.28	4.228e-19	2.397e-18		AO090003000904	2	4543805	4544621	816	2126.36	2.32	0.26	1.997e-20	1.242e-19
AO090701000423	5	1224511	1227576	3065	185.35	-1.95	0.22	4.281e-19	2.424e-18		AO090003000121	2	2421701	2423750	2049	51769.2	1.34	0.15	2e-20	1.243e-19
AO090012000522	4	1332845	1333378	533	245.78	1.68	0.19	4.305e-19	2.437e-18		AO090103000467	8	92979	94476	1497	107.69	-6.29	0.71	2.044e-20	1.27e-19
AO090124000074	5	2501636	2502748	1112	15364.2	-1.29	0.15	4.448e-19	2.517e-18		AO090120000414	5	3790889	3792655	1766	1543.95	1.58	0.17	2.088e-20	1.296e-19
AO090011000195	7	502760	503368	608	90.46	-3.4	0.4	4.472e-19	2.529e-18		AO090103t00011	8	276503	276575	72	512.63	-2.39	0.27	2.123e-20	1.318e-19
AO090009000293	1	780315	780758	443	520.12	1.37	0.16	4.836e-19	2.731e-18		AO090038000367	6	2703465	2704367	902	1030.99	1.53	0.17	2.127e-20	1.319e-19
AO090010000101	8	3156643	3158679	2036	184	-3.52	0.41	4.957e-19	2.798e-18		AO090003000466	2	3342604	3348114	5510	8151.08	1.5	0.16	2.158e-20	1.337e-19
AO090003001375	2	5806830	5808150	1320	2094.43	-1.44	0.17	5.165e-19	2.911e-18		AO090701000530	5	948434	954509	6075	244.8	-5.5	0.61	2.335e-20	1.446e-19
AO090003001099	2	5083840	5088094	4254	7446.17	-2.23	0.26	5.214e-19	2.937e-18		AO090026000047	3	4997193	4997702	509	89.31	-5.45	0.61	2.361e-20	1.462e-19
AO090010000668	8	1648937	1650076	1139	229.84	3.36	0.39	5.455e-19	3.071e-18		AO090001000231	2	557225	559313	2088	341.84	3.1	0.35	2.375e-20	1.47e-19
AO090103000048	8	1120175	1124477	4302	7338.16	-1.6	0.18	5.509e-19	3.1e-18		AO090026000175	3	4624283	4624663	380	213150	-3.22	0.36	2.417e-20	1.495e-19
AO090011000575	7	1454070	1455182	1112	425.03	-1.04	0.12	5.708e-19	3.211e-18		AO090011000145	7	397025	398417	1392	493.57	1.55	0.17	2.474e-20	1.529e-19
AO090001000150	2	336474	337424	950	267.43	-1.21	0.14	5.771e-19	3.245e-18		AO090113000107	5	4307773	4308910	1137	359.31	-2.2	0.24	2.557e-20	1.579e-19
AO090010000342	8	2444104	2445022	918	184.37	-1.69	0.19	5.929e-19	3.327e-18		AO090005001503	1	2440453	2442110	1657	1844.29	1.25	0.14	2.603e-20	1.607e-19
AO090005000092	1	6197881	6198869	988	1697.49	1.21	0.14	6.012e-19	3.372e-18		AO090012000593	4	1506388	1506838	450	658.21	1.63	0.18	2.658e-20	1.64e-19
AO090020000544	6	429332	431518	2186	123.83	2.05	0.24	6.208e-19	3.48e-18		AO090012000642	4	1634772	1635681	909	859.53	-1.38	0.15	2.663e-20	1.643e-19
AO090124000084	5	2467555	2473898	6343	23931.3	1.19	0.14	6.27e-19	3.513e-18		AO090005001643	1	2038107	2040808	2701	5669.55	1.07	0.12	2.691e-20	1.659e-19
AO090001000572	2	1503996	1504833	837	1782.84	1.1	0.13	6.339e-19	3.55e-18		AO090009000590	1	1564107	1566746	2639	3954.91	1.67	0.18	2.761e-20	1.701e-19
AO090003000153	2	2507401	2508517	1116	75	-2.36	0.27	6.369e-19	3.565e-18		AO090005000482	1	5155981	5158057	2076	648.16	-3.43	0.38	2.823e-20	1.738e-19
AO090005000990	1	3778919	3781460	2541	233.43	-1.73	0.2	6.527e-19	3.652e-18		AO090103000425	8	191228	191660	432	56.23	3.95	0.44	2.987e-20	1.838e-19
AO090012000830	4	2136223	2137813	1590	1236.55	1.07	0.12	6.574e-19	3.676e-18		AO090005000057	1	6281869	6282985	1116	290.18	2.02	0.22	3.009e-20	1.851e-19
AO090011000694	7	1787587	1788355	768	152.12	1.39	0.16	6.953e-19	3.879e-18		AO090102000448	4	3309578	3310605	1027	77.69	-3.68	0.41	3.194e-20	1.963e-19
AO090701000077	5	2152407	2153012	605	1010.36	-1.2	0.14	7.235e-19	4.034e-18		AO090012000505	4	1282169	1285525	3356	12045.8	1.35	0.15	3.281e-20	2.015e-19
AO090120000001	5	2694190	2696221	2031	135.47	-2.47	0.29	7.288e-19	4.062e-18		AO090011000853	7	2177945	2179832	1887	1348.58	1.6	0.18	3.36e-20	2.063e-19
AO090102000362	4	3544103	3545090	987	181.72	-1.47	0.17	7.538e-19	4.199e-18		AO090113000183	5	4476546	4477077	531	611.54	-1.82	0.2	3.374e-20	2.071e-19
AO090012000565	4	1438780	1440792	2012	4344.24	-2.67	0.31	7.992e-19	4.45e-18		AO090003001340	2	5725366	5727355	1989	3384.24	-1.33	0.15	3.384e-20	2.075e-19
AO090010000145	8	3017279	3018731	1452	881.71	-1.2	0.14	8.08e-19	4.495e-18		AO090011000718	7	1835924	1836480	556	345.27	-1.8	0.2	3.404e-20	2.087e-19
AO090005000986	1	3790943	3793340	2397	271.01	1.15	0.13	8.327e-19	4.623e-18		AO090701000173	5	1878289	1880153	1864	5513.33	1.27	0.14	3.478e-20	2.131e-19
AO090012000240	4	589938	590730	792	2108.66	1.24	0.14	8.562e-19	4.751e-18		AO090010000462	8	2157886	2159242	1356	652.32	1.62	0.18	3.783e-20	2.316e-19
AO090020000562	6	394841	395554	713	96.06	1.88	0.22	8.662e-19	4.804e-18		AO090005001379	1	2761420	2761860	440	1010.78	-2.41	0.27	3.958e-20	2.422e-19
AO090103000132	8	915979	917547	1568	240.76	-1.36	0.16	8.742e-19	4.847e-18		AO090012000574	4	1457195	1457782	587	646.36	1.78	0.2	4.161e-20	2.545e-19
AO090012000437	4	1090873	1091674	801	3956.6	-1.7	0.2	9.092e-19	5.038e-18		AO090005000585	1	4895877	4896801	924	72.21	4.9	0.55	4.178e-20	2.554e-19
AO090120000179	5	3132538	3135143	2605	9140.45	1.58	0.18	9.368e-19	5.186e-18		AO090011000438	7	1111938	1112758	820	3828.45	-1.64	0.18	4.241e-20	2.591e-19
AO090102000185	4	4054861	4055858	997	387.59	-1.14	0.13	1.027e-18	5.679e-18		AO090001000075	2	170616	171579	963	280.69	-2.13	0.24	4.342e-20	2.651e-19
AO090012000493	4	1230849	1231855	1006	549.74	1.02	0.12	1.059e-18	5.853e-18		AO090120000408	5	3781802	3783012	1210	8838.99	-1.49	0.16	4.7e-20	2.869e-19
AO090003001421	2	5921564	5924717	3153	117.43	-3	0.35	1.064e-18	5.88e-18		AO090120000142	5	3033323	3035231	1908	233.41	1.59	0.18	4.825e-20	2.943e-19
AO090120000187	5	3153844	3154951	1107	442.86	-1.66	0.19	1.077e-18	5.949e-18		AO090023001001	3	2643138	2644347	1209	1411.7	1.38	0.15	5.094e-20	3.105e-19
AO090012000341	4	835158	836200	1042	105.74	-3.3	0.39	1.13e-18	6.237e-18		AO090001000317	2	807511	808267	756	623.14	-1.96	0.22	5.146e-20	3.135e-19
AO090026000295	3	4276381	4277082	701	600.47	-1.3	0.15	1.197e-18	6.599e-18		AO090010000448	8	2191732	2192368	636	4276.43	2.9	0.33	5.17e-20	3.148e-19
AO090113000130	5	4353884	4354878	994	301.01	1.81	0.21	1.207e-18	6.652e-18		AO090009000021	1	67532	68195	663	97.82	-4.45	0.5	5.377e-20	3.272e-19
AO090012000657	4	1672879	1674855	1976	956.05	1.27	0.15	1.262e-18	6.943e-18		AO090102000139	4	4179346	4180918	1572	340.84	-2.26	0.25	5.657e-20	3.441e-19
AO090001000257	2	628005	628813	808	192.53	-1.75	0.2	1.263e-18	6.947e-18		AO090012000890	4	2305171	2307022	1851	4863.34	3.67	0.41	5.675e-20	3.45e-19
AO090701000789	5	293529	295763	2234	163.74	-1.58	0.18	1.328e-18	7.297e-18		AO090001000618	2	1618516	1619329	813	432.96	-1.86	0.21	5.811e-20	3.531e-19
AO090011000913	7	2382402	2384365	1963	5342.92	1.26	0.15	1.344e-18	7.382e-18		AO090038000563	6	2129564	2130705	1141	670.92	1.52	0.17	6.016e-20	3.653e-19
AO090001000029	2	65675	67216	1541	60.58	-2.78	0.32	1.348e-18	7.401e-18		AO090003001058	2	4942262	4943530	1268	174.06	-3.14	0.36	6.543e-20	3.971e-19
AO090001000343	2	860107	861646	1539	1456.46	1.35	0.16	1.408e-18	7.724e-18		AO090005000104	1	6164032	6165824	1792	8608.32	2.01	0.23	7.102e-20	4.308e-19
AO090026000488	3	3742485	3746314	3829	387.62	2.2	0.26	1.452e-18	7.96e-18		AO090001000563	2	1478312	1479154	842	56.93	4.72	0.53	7.114e-20	4.313e-19
AO090005000054	1	6291480	6292942	1462	74.99	2.25	0.26	1.464e-18	8.018e-18		AO090010000687	8	1612486	1613067	581	196.4	-2.21	0.25	8.019e-20	4.859e-19
AO090011000773	7	1967262	1969086	1824	4085.88	1.42	0.17	1.554e-18	8.499e-18		AO090023000223	3	558566	560033	1467	490.97	1.89	0.21	8.135e-20	4.927e-19
AO090003000444	2	3274021	3275794	1773	1244.23	-1.37	0.16	1.58e-18	8.64e-18		AO090003000747	2	4099108	4100854	1746	2003.19	-1.54	0.17	8.294e-20	5.02e-19
AO090003000175	2	2570991	2572006	1015	202.95	-1.43	0.17	1.613e-18	8.816e-18		AO090102000258	4	3849884	3852387	2503	629.78	1.36	0.15	8.594e-20	5.199e-19
AO090003000849	2	4400813	4401467	654	51.8	2.32	0.27	1.624e-18	8.872e-18		AO090020000148	6	1439007	1439962	955	1461.75	-1.34	0.15	8.968e-20	5.423e-19
AO090005000309	1	5621885	5623659	1774	68.97	-2.62	0.31	1.631e-18	8.908e-18		AO090003001015	2	4837853	4839668	1815	63.76	-4.81	0.55	9.21e-20	5.566e-19
AO090010000390	8	2318764	2319787	1023	404.98	-1.73	0.2	1.678e-18	9.159e-18		AO090120000109	5	2951576	2953116	1540	12458	1.25	0.14	9.639e-20	5.822e-19
AO090026000633	3	3368935	3369647	712	39.3	2.65	0.31	1.739e-18	9.483e-18		AO090005000697	1	4582875	4585139	2264	12891.1	1.57	0.18	9.968e-20	6.017e-19
AO090120000018	5	2729226	2729959	733	102.43	-2.23	0.26	1.81e-18	9.864e-18		AO090003000243	2	2738232	2739812	1580	5337.66	-2.69	0.31	1.003e-19	6.051e-19
AO090010000504	8	2042707	2043906	1199	174.5	-1.61	0.19	1.851e-18	1.008e-17		AO090038000331	6	2788773	2792857	4084	1433.74	-1.38	0.15	1.032e-19	6.225e-19
AO090011000609	7	1560994	1563949	2955	204.39	-1.46	0.17	1.928e-18	1.049e-17		AO090012000802	4	2058950	2059917	967	3354.2	1.18	0.13	1.053e-19	6.348e-19
AO090026000279	3	4324590	4325671	1081	210.63	-1.72	0.2	1.928e-18	1.049e-17		AO090701000204	5	1797175	1798156	981	1509.6	-1.17	0.13	1.128e-19	6.797e-19
AO090023000634	3	1666938	1667623	685	1210.56	-1.68	0.2	1.947e-18	1.058e-17		AO090012000945	4	2444684	2446699	2015	426.09	-2.08	0.23	1.139e-19	6.859e-19
AO090113000103	5	4295947	4300853	4906	254.26	-1.25	0.15	1.959e-18	1.064e-17		AO090102000411	4	3403464	3404325	861	196.18	-2.17	0.25	1.18e-19	7.102e-19
AO090023000900	3	2355749	2356361	612	2651.82	-2.06	0.24	2.154e-18	1.169e-17		AO090012000449	4	1125633	1126875	1242	1726.05	-1.09	0.12	1.185e-19	7.129e-19
AO090020000623	6	230820	231867	1047	3872.3	1.06	0.12	2.18e-18	1.183e-17		AO090003000603	2	3705066	3706274	1208	674.09	1.19	0.13	1.204e-19	7.239e-19
AO090011000344	7	882133	883099	966	7667.14	1.32	0.16	2.301e-18	1.248e-17		AO090011000666	7	1718780	1720521	1741	539.77	1.61	0.18	1.27e-19	7.63e-19
AO090005000166	1	5986432	5988381	1949	13882.3	-1.09	0.13	2.319e-18	1.257e-17		AO090026000228	3	4478815	4480077	1262	1307.67	1.48	0.17	1.276e-19	7.658e-19
AO090701000526	5	964027	966029	2002	20846.8	-1.14	0.13	2.341e-18	1.268e-17		AO090026000100	3	4838955	4839817	862	1397.83	4.16	0.47	1.286e-19	7.717e-19
AO090023000689	3	1816403	1817149	746	1128.97	1.23	0.14	2.377e-18	1.286e-17		AO090001000588	2	1541902	1542784	882	160.96	-2.23	0.25	1.398e-19	8.387e-19
AO090001000296	2	759206	761708	2502	1705.82	1.08	0.13	2.567e-18	1.387e-17		AO090701000754	5	373774	374595	821	1533.24	1.37	0.15	1.428e-19	8.559e-19
AO090023000395	3	1014665	1016216	1551	26335.1	1.26	0.15	2.642e-18	1.426e-17		AO090005001076	1	3573880	3576058	2178	572.97	1.39	0.16	1.457e-19	8.729e-19
AO090012000890	4	2305171	2307022	1851	10401.3	1.45	0.17	2.658e-18	1.434e-17		AO090120000234	5	3292440	3294597	2157	5162.75	2.85	0.33	1.494e-19	8.947e-19
AO090020000504	6	539680	540080	400	199.95	-2.07	0.24	2.672e-18	1.441e-17		AO090103000266	8	584835	585348	513	162.81	-6.81	0.79	1.51e-19	9.034e-19
AO090103000359	8	337853	338867	1014	102.05	-3.77	0.46	2.759e-18	1.487e-17		AO090009000640	1	1712691	1713108	417	229.22	1.67	0.19	1.566e-19	9.368e-19
AO090026000160	3	4664070	4665222	1152	2145.96	-2.06	0.24	2.973e-18	1.602e-17		AO090003000335	2	3006032	3007061	1029	202.67	-2.85	0.33	1.622e-19	9.699e-19
AO090010000746	8	1450562	1452601	2039	227.67	-1.51	0.18	3.041e-18	1.637e-17		AO090009000020	1	66922	67430	508	76.17	-4.17	0.48	1.64e-19	9.801e-19
AO090701000581	5	812898	814532	1634	72.48	-2.3	0.27	3.076e-18	1.656e-17		AO090020000050	6	1681378	1684164	2786	46365.5	-1.07	0.12	1.641e-19	9.802e-19
AO090010000324	8	2474250	2478648	4398	750.84	-1.03	0.12	3.134e-18	1.685e-17		AO090120000246	5	3325678	3326575	897	450.68	2.33	0.26	1.68e-19	1.003e-18
AO090003000494	2	3420173	3420578	405	74.55	-2.48	0.29	3.26e-18	1.752e-17		AO090023000206	3	518375	520514	2139	15694	1.34	0.15	1.771e-19	1.056e-18
AO090011000430	7	1088948	1089715	767	252.59	-2.49	0.29	3.345e-18	1.797e-17		AO090103000129	8	923370	925232	1862	116.84	-2.72	0.31	1.834e-19	1.093e-18
AO090012000332	4	815843	817489	1646	162.83	-2.1	0.25	3.348e-18	1.798e-17		AO090003000863	2	4436583	4438157	1574	160.36	-2.51	0.29	1.844e-19	1.098e-18
AO090038000625	6	1963148	1963826	678	1852.97	1.06	0.12	3.429e-18	1.84e-17		AO090005000099	1	6176450	6177869	1419	842.68	1.95	0.22	1.849e-19	1.1e-18
AO090012000656	4	1672054	1672740	686	249.26	-1.78	0.21	3.609e-18	1.934e-17		AO090009000187	1	502635	504027	1392	313.48	1.79	0.2	1.92e-19	1.142e-18
AO090003000587	2	3660319	3661162	843	698.64	-1.93	0.23	3.707e-18	1.986e-17		AO090026000039	3	5013844	5016724	2880	233.86	-2.22	0.25	1.94e-19	1.153e-18
AO090005001464	1	2557462	2558322	860	3387.73	-1.03	0.12	3.731e-18	1.998e-17		AO090010000654	8	1681412	1683164	1752	720.25	2.74	0.31	2.015e-19	1.198e-18
AO090103000417	8	208612	210938	2326	192.12	1.83	0.22	3.784e-18	2.025e-17		AO090003001050	2	4917445	4918853	1408	799.31	1.62	0.18	2.066e-19	1.227e-18
AO090003001297	2	5604768	5605728	960	2016.99	1.22	0.14	4.019e-18	2.149e-17		AO090020000684	6	89186	90932	1746	301.51	3	0.34	2.096e-19	1.244e-18
AO090166000081	4	4786898	4788746	1848	181	-3.18	0.38	4.048e-18	2.164e-17		AO090001000375	2	942998	945020	2022	4284.76	1.5	0.17	2.111e-19	1.253e-18
AO090020000627	6	220592	221635	1043	1857.06	-1.76	0.21	4.289e-18	2.291e-17		AO090012000971	4	2518557	2519910	1353	2109.87	-1.1	0.12	2.139e-19	1.268e-18
AO090023000608	3	1599580	1600405	825	122.86	-2.84	0.34	4.294e-18	2.293e-17		AO090003000080	2	2306562	2308033	1471	834.56	1.5	0.17	2.152e-19	1.275e-18
AO090005000598	1	4861538	4861961	423	772.57	1.09	0.13	4.431e-18	2.365e-17		AO090009000121	1	329299	329902	603	191.78	2.64	0.3	2.161e-19	1.28e-18
AO090001000176	2	395520	396327	807	93.75	2.12	0.25	4.614e-18	2.461e-17		AO090103000026	8	1200297	1202542	2245	3081.88	-2.02	0.23	2.168e-19	1.283e-18
AO090009000483	1	1279731	1280909	1178	583.9	1.16	0.14	4.668e-18	2.489e-17		AO090120000189	5	3156731	3157508	777	589.75	-2.29	0.26	2.215e-19	1.311e-18
AO090001000634	2	1667478	1669829	2351	559.86	-1.46	0.17	4.841e-18	2.578e-17		AO090012000288	4	711323	713248	1925	246.39	1.94	0.22	2.26e-19	1.337e-18
AO090003000919	2	4587804	4588632	828	8634.44	2.12	0.25	4.873e-18	2.594e-17		AO090005000250	1	5770029	5771683	1654	128.53	2.91	0.33	2.374e-19	1.403e-18
AO090701000527	5	960885	962539	1654	52.59	-3.01	0.36	4.913e-18	2.614e-17		AO090026000087	3	4865976	4867596	1620	2442.58	-1.89	0.21	2.435e-19	1.439e-18
AO090009000179	1	480964	481582	618	567.52	1.62	0.19	5.076e-18	2.699e-17		AO090001000666	2	1754241	1755637	1396	1099.56	1.32	0.15	2.472e-19	1.46e-18
AO090020000107	6	1534282	1536625	2343	6269.87	1.38	0.16	5.167e-18	2.746e-17		AO090003001268	2	5533101	5533878	777	154.97	-5.52	0.63	2.514e-19	1.484e-18
AO090020000571	6	370557	371625	1068	103.14	-2.2	0.26	5.359e-18	2.847e-17		AO090011000564	7	1424455	1426171	1716	107.63	-4.24	0.49	2.546e-19	1.502e-18
AO090023000370	3	943593	944937	1344	203.94	-1.32	0.16	5.396e-18	2.865e-17		AO090003000302	2	2911048	2912870	1822	3693.97	-1.3	0.15	2.582e-19	1.522e-18
AO090701000042	5	2242824	2245541	2717	409.08	-1.64	0.2	5.628e-18	2.987e-17		AO090026000198	3	4560341	4561531	1190	46.44	3.45	0.4	2.669e-19	1.572e-18
AO090003000443	2	3270187	3272161	1974	4726.88	-1.35	0.16	5.818e-18	3.085e-17		AO090001000541	2	1410168	1410590	422	72.53	-4.8	0.55	2.892e-19	1.702e-18
AO090009000148	1	399352	400935	1583	4823.02	1.29	0.15	5.854e-18	3.103e-17		AO090113000192	5	4495592	4496759	1167	94.18	-5.48	0.63	2.892e-19	1.702e-18
AO090023000114	3	287495	289444	1949	3208.58	1.42	0.17	6.056e-18	3.207e-17		AO090011000324	7	819517	820514	997	740.17	2.25	0.26	2.986e-19	1.756e-18
AO090206000025	7	2648746	2651143	2397	12676.6	1.63	0.19	6.255e-18	3.309e-17		AO090120000397	5	3743352	3743989	637	2557.57	1.25	0.14	3.038e-19	1.786e-18
AO090003000829	2	4324753	4326293	1540	4232.53	-1.81	0.22	6.297e-18	3.33e-17		AO090011000512	7	1283219	1284147	928	2337.62	-1.86	0.21	3.457e-19	2.031e-18
AO090701000590	5	800205	801330	1125	495.22	-1.27	0.15	6.326e-18	3.344e-17		AO090102000414	4	3397364	3399340	1976	548.28	-2.02	0.23	3.465e-19	2.035e-18
AO090001000090	2	200914	202508	1594	828.18	-1.8	0.21	6.456e-18	3.411e-17		AO090026000708	3	3183583	3184022	439	16826.1	3	0.35	3.759e-19	2.206e-18
AO090011000112	7	314111	315630	1519	680.82	-2.1	0.25	6.477e-18	3.42e-17		AO090009000117	1	322403	323845	1442	39846.8	2.23	0.26	3.835e-19	2.25e-18
AO090011000459	7	1160840	1161944	1104	172.61	-1.79	0.21	6.499e-18	3.431e-17		AO090012000988	4	2560207	2566780	6573	17030.3	1.64	0.19	3.849e-19	2.257e-18
AO090103000235	8	661260	664067	2807	60.05	-3	0.36	6.784e-18	3.579e-17		AO090010000214	8	2833252	2834401	1149	324.54	1.52	0.17	3.876e-19	2.272e-18
AO090009000225	1	605112	605895	783	2757.05	1.05	0.12	7e-18	3.691e-17		AO090009000333	1	877538	879442	1904	2685.94	1.41	0.16	4.45e-19	2.605e-18
AO090138000063	6	4066452	4068851	2399	115.16	-1.64	0.2	7.557e-18	3.977e-17		AO090012000450	4	1130365	1131742	1377	2174.66	1.46	0.17	4.449e-19	2.605e-18
AO090003001441	2	5965868	5968140	2272	116.44	-3.21	0.39	8.245e-18	4.337e-17		AO090003001364	2	5790555	5791446	891	154.54	-4.58	0.53	4.59e-19	2.686e-18
AO090020000694	6	68678	70152	1474	122.77	-3.31	0.4	8.538e-18	4.489e-17		AO090003001502	2	6115249	6116710	1461	1567.27	-2.87	0.33	4.597e-19	2.689e-18
AO090001000488	2	1233467	1235377	1910	8270.2	1	0.12	8.576e-18	4.506e-17		AO090023000939	3	2475253	2476518	1265	1190.31	-1.1	0.13	4.675e-19	2.733e-18
AO090003000935	2	4633279	4634206	927	315.67	1.39	0.17	9.131e-18	4.794e-17		AO090005000803	1	4267867	4268592	725	164516	-1.47	0.17	4.684e-19	2.736e-18
AO090003001204	2	5368637	5369948	1311	2110.27	1.99	0.24	9.209e-18	4.832e-17		AO090012000970	4	2515680	2517536	1856	5262.98	-1.34	0.15	4.775e-19	2.788e-18
AO090003001283	2	5571516	5572011	495	293.89	-1.64	0.2	9.35e-18	4.904e-17		AO090120000267	5	3378437	3380213	1776	730.18	-1.88	0.22	4.875e-19	2.845e-18
AO090003001506	2	6123903	6125908	2005	132.8	-1.62	0.19	9.423e-18	4.94e-17		AO090012000604	4	1538860	1539792	932	60.05	2.92	0.34	4.969e-19	2.899e-18
AO090023000147	3	373830	374673	843	30529.2	2.31	0.28	9.725e-18	5.094e-17		AO090026000839	3	2826078	2826918	840	4702.34	-1.58	0.18	5.018e-19	2.925e-18
AO090012000900	4	2324728	2325562	834	205.34	2.05	0.24	9.918e-18	5.193e-17		AO090701000086	5	2126073	2127561	1488	4113.75	-1.58	0.18	5.247e-19	3.058e-18
AO090010000763	8	1407252	1408941	1689	4972.81	-1.39	0.17	1.042e-17	5.447e-17		AO090023000956	3	2526039	2526834	795	1182.7	1.45	0.16	5.4e-19	3.145e-18
AO090038000339	6	2773522	2775245	1723	6504.77	1.46	0.18	1.05e-17	5.49e-17		AO090005000330	1	5585431	5586538	1107	876.99	4.67	0.54	5.768e-19	3.357e-18
AO090003001322	2	5676231	5677630	1399	310438	1.25	0.15	1.075e-17	5.618e-17		AO090011000371	7	950599	951034	435	266.62	-1.7	0.19	5.784e-19	3.365e-18
AO090011000203	7	527348	528182	834	1656.49	1.78	0.21	1.096e-17	5.724e-17		AO090011000725	7	1858856	1861451	2595	482.83	-2.01	0.23	6.415e-19	3.73e-18
AO090009000431	1	1131504	1132171	667	402.59	-1.39	0.17	1.133e-17	5.907e-17		AO090010000327	8	2469360	2471558	2198	432.11	-1.43	0.16	6.441e-19	3.744e-18
AO090701000730	5	431376	433085	1709	12737.9	-1.16	0.14	1.146e-17	5.973e-17		AO090038000248	6	3012042	3013305	1263	771.75	1.48	0.17	6.527e-19	3.791e-18
AO090138000090	6	4004606	4007163	2557	132.8	-1.92	0.23	1.151e-17	5.993e-17		AO090120000495	5	4013381	4014268	887	856.4	1.38	0.16	6.599e-19	3.831e-18
AO090010000086	8	3184420	3185166	746	129.22	-1.78	0.21	1.183e-17	6.156e-17		AO090001000113	2	260435	261683	1248	132.49	-2.98	0.35	7.163e-19	4.157e-18
AO090012001016	4	2630929	2632829	1900	3498.61	1.03	0.12	1.261e-17	6.556e-17		AO090012000410	4	1004774	1006994	2220	424.75	1.6	0.18	7.243e-19	4.201e-18
AO090102000033	4	4461431	4463296	1865	52.73	-3.42	0.42	1.312e-17	6.816e-17		AO090005000625	1	4790977	4792631	1654	897.79	1.19	0.14	7.947e-19	4.607e-18
AO090023000637	3	1671289	1672716	1427	2603.78	1.96	0.24	1.341e-17	6.961e-17		AO090010000476	8	2116368	2117433	1065	766.33	2.32	0.27	8.446e-19	4.893e-18
AO090001000539	2	1407714	1408257	543	160.07	-1.59	0.19	1.361e-17	7.058e-17		AO090701000184	5	1852135	1854418	2283	6152.44	-1.4	0.16	8.902e-19	5.155e-18
AO090005000360	1	5516884	5517928	1044	46.18	3.18	0.39	1.401e-17	7.258e-17		AO090005001443	1	2613261	2614542	1281	954.44	1.2	0.14	9.282e-19	5.372e-18
AO090026000611	3	3424658	3426879	2221	395.2	-1.2	0.14	1.43e-17	7.407e-17		AO090010000336	8	2456198	2457452	1254	1966.18	-2.07	0.24	9.478e-19	5.483e-18
AO090038000112	6	3381637	3382751	1114	455.14	-2.49	0.3	1.442e-17	7.467e-17		AO090003001067	2	4971735	4973633	1898	15571.2	-2.02	0.23	9.58e-19	5.539e-18
AO090012000608	4	1549882	1550794	912	144.13	-1.53	0.18	1.53e-17	7.915e-17		AO090102000535	4	3073174	3073808	634	1183.46	1.66	0.19	9.962e-19	5.756e-18
AO090005000568	1	4949625	4950250	625	488.3	1.09	0.13	1.566e-17	8.084e-17		AO090026000408	3	3970341	3971015	674	140.71	-3.16	0.37	1.001e-18	5.779e-18
AO090003001273	2	5543432	5544170	738	2239.3	-1.34	0.16	1.567e-17	8.086e-17		AO090003000924	2	4604242	4607225	2983	1029.4	1.38	0.16	1.007e-18	5.815e-18
AO090011000866	7	2215599	2218285	2686	1323.76	-1.14	0.14	1.627e-17	8.383e-17		AO090005001506	1	2436281	2437051	770	1137.54	-1.66	0.19	1.056e-18	6.088e-18
AO090026000343	3	4129915	4132513	2598	3506	1.19	0.14	1.736e-17	8.94e-17		AO090102000633	4	2818258	2820553	2295	7343.82	-1.42	0.16	1.056e-18	6.088e-18
AO090020000710	6	30588	31374	786	466.84	1.45	0.17	1.853e-17	9.535e-17		AO090026000636	3	3362460	3363493	1033	222.72	1.63	0.19	1.062e-18	6.124e-18
AO090010000062	8	3239011	3240814	1803	545.86	-1.15	0.14	1.928e-17	9.904e-17		AO090003000001	2	2099054	2099548	494	1414.35	1.17	0.13	1.116e-18	6.432e-18
AO090103000217	8	721449	722511	1062	120.6	1.75	0.21	1.927e-17	9.904e-17		AO090120000503	5	4026916	4027690	774	678.15	1.16	0.13	1.119e-18	6.442e-18
AO090001000379	2	953429	954437	1008	372.53	1.28	0.15	1.986e-17	1.02e-16		AO090005000425	1	5334440	5335703	1263	821.65	1.95	0.23	1.161e-18	6.68e-18
AO090103000152	8	872300	874178	1878	1624.62	-1.13	0.14	2.011e-17	1.032e-16		AO090010000613	8	1786599	1787678	1079	774.32	2.33	0.27	1.172e-18	6.741e-18
AO090010000216	8	2826395	2829976	3581	2663.51	-1.06	0.13	2.151e-17	1.103e-16		AO090011000343	7	880339	880987	648	1540.49	1.75	0.2	1.178e-18	6.769e-18
AO090023000871	3	2275048	2276325	1277	776.47	2.2	0.27	2.176e-17	1.115e-16		AO090023000912	3	2393898	2395167	1269	2400.59	1.52	0.17	1.178e-18	6.769e-18
AO090010000081	8	3200581	3201747	1166	115.91	-2.48	0.3	2.216e-17	1.134e-16		AO090023000504	3	1312908	1315698	2790	1404.92	1.06	0.12	1.218e-18	6.992e-18
AO090011000358	7	916340	918020	1680	892.63	1.42	0.17	2.255e-17	1.153e-16		AO090011000771	7	1962531	1965061	2530	466.11	1.46	0.17	1.24e-18	7.115e-18
AO090009000250	1	663004	663520	516	741.08	-1.03	0.12	2.3e-17	1.176e-16		AO090038000377	6	2687586	2688764	1178	888.89	1.51	0.17	1.255e-18	7.199e-18
AO090026000501	3	3713085	3713564	479	1388.9	1.29	0.16	2.307e-17	1.179e-16		AO090020000211	6	1292961	1294868	1907	324.69	-1.43	0.16	1.36e-18	7.8e-18
AO090010000443	8	2200318	2200818	500	13908.7	1.83	0.22	2.335e-17	1.192e-16		AO090001000553	2	1445137	1446109	972	7428.16	1.19	0.14	1.531e-18	8.774e-18
AO090023000600	3	1582499	1583453	954	950.01	-1.19	0.14	2.389e-17	1.218e-16		AO090010000620	8	1766331	1767735	1404	235.56	-3.06	0.36	1.552e-18	8.888e-18
AO090138000150	6	3839123	3840451	1328	57.59	-2.49	0.3	2.432e-17	1.239e-16		AO090012000806	4	2068522	2069671	1149	901.98	1.18	0.14	1.597e-18	9.142e-18
AO090005000809	1	4249534	4250405	871	1329.86	1.34	0.16	2.45e-17	1.248e-16		AO090023001009	3	2654074	2654654	580	26718.7	-1.85	0.22	1.63e-18	9.319e-18
AO090103000495	8	36701	38483	1782	452.1	-2.22	0.27	2.469e-17	1.256e-16		AO090038000482	6	2372753	2373303	550	567.78	4.42	0.52	1.629e-18	9.319e-18
AO090011000156	7	422422	424448	2026	149.75	1.78	0.22	2.53e-17	1.287e-16		AO090012000689	4	1747405	1750854	3449	88	5.27	0.62	1.632e-18	9.328e-18
AO090701000742	5	401603	403010	1407	12061.9	1.6	0.19	2.635e-17	1.34e-16		AO090103000027	8	1195881	1198677	2796	6310.73	-1.63	0.19	1.666e-18	9.516e-18
AO090003001359	2	5777168	5777645	477	136.61	-2.94	0.36	2.65e-17	1.347e-16		AO090120000175	5	3124584	3125223	639	2882.63	2.03	0.24	1.691e-18	9.655e-18
AO090012000082	4	189819	191984	2165	94.3	1.66	0.2	2.655e-17	1.349e-16		AO090009000643	1	1716041	1717821	1780	1455.74	1.14	0.13	1.707e-18	9.743e-18
AO090023000529	3	1402801	1404872	2071	276.54	-2.48	0.3	3.017e-17	1.53e-16		AO090701000122	5	2015382	2018700	3318	1787.06	1.07	0.12	1.836e-18	1.047e-17
AO090038000300	6	2875920	2877311	1391	174.24	1.52	0.18	3.024e-17	1.533e-16		AO090011000726	7	1861852	1862788	936	811.52	-2.31	0.27	1.844e-18	1.051e-17
AO090120000221	5	3250476	3255908	5432	4463.25	-1.52	0.19	3.087e-17	1.563e-16		AO090003001165	2	5267320	5268920	1600	5875.21	2.03	0.24	1.894e-18	1.079e-17
AO090026000378	3	4038631	4041847	3216	90.25	2.16	0.26	3.236e-17	1.637e-16		AO090012000561	4	1432713	1434311	1598	1511.98	-1.67	0.19	1.904e-18	1.085e-17
AO090003001345	2	5738192	5739418	1226	451.5	1.06	0.13	3.324e-17	1.681e-16		AO090010000351	8	2418956	2420373	1417	358.83	4.2	0.5	1.983e-18	1.129e-17
AO090011000198	7	508648	511435	2787	89.33	-3.18	0.39	3.46e-17	1.749e-16		AO090023000689	3	1816403	1817149	746	800.34	1.48	0.17	2.092e-18	1.19e-17
AO090023000925	3	2428852	2429773	921	994.25	2.01	0.24	3.624e-17	1.831e-16		AO090012000210	4	527297	528617	1320	6375.13	1.48	0.17	2.129e-18	1.211e-17
AO090012000883	4	2291202	2292123	921	208.79	1.96	0.24	3.633e-17	1.835e-16		AO090003000851	2	4402621	4403654	1033	380.32	-1.67	0.19	2.211e-18	1.257e-17
AO090020000293	6	1088253	1089324	1071	90.75	2.31	0.28	3.78e-17	1.907e-16		AO090103000401	8	247063	249224	2161	1627.53	-1.7	0.2	2.257e-18	1.282e-17
AO090701000797	5	278039	279404	1365	3704.29	-1.58	0.19	3.859e-17	1.946e-16		AO090003000288	2	2869518	2871453	1935	485	1.71	0.2	2.26e-18	1.283e-17
AO090103000321	8	451393	451951	558	1123.77	1	0.12	3.967e-17	2e-16		AO090012000098	4	237693	239568	1875	112.34	3.78	0.45	2.26e-18	1.283e-17
AO090005000838	1	4173705	4176570	2865	21259.5	1.83	0.22	4.008e-17	2.02e-16		AO090003000722	2	4036454	4037384	930	1895.87	1.64	0.19	2.377e-18	1.348e-17
AO090001000481	2	1215473	1216277	804	8666.95	1.28	0.16	4.028e-17	2.029e-16		AO090005000297	1	5651749	5652517	768	66.36	-4.72	0.56	2.381e-18	1.35e-17
AO090010000481	8	2105724	2106491	767	17455.5	1.02	0.12	4.264e-17	2.145e-16		AO090026000824	3	2881929	2883609	1680	5665.85	-1.37	0.16	2.425e-18	1.374e-17
AO090010000463	8	2156268	2157582	1314	40516	1.49	0.18	4.635e-17	2.33e-16		AO090003000940	2	4641419	4642791	1372	533.67	1.74	0.2	2.511e-18	1.422e-17
AO090010000699	8	1573880	1575807	1927	148.55	1.53	0.19	4.762e-17	2.392e-16		AO090003000294	2	2887207	2888397	1190	720.08	1.48	0.17	2.516e-18	1.424e-17
AO090023000916	3	2401264	2404081	2817	21441.3	1.39	0.17	4.777e-17	2.398e-16		AO090011000764	7	1950070	1951989	1919	24341	3.01	0.36	2.521e-18	1.426e-17
AO090701000183	5	1857053	1858664	1611	610.98	-1.18	0.14	4.906e-17	2.46e-16		AO090701000238	5	1713356	1713791	435	358.19	-2.28	0.27	2.539e-18	1.436e-17
AO090010000687	8	1612486	1613067	581	81.96	-1.94	0.24	5.113e-17	2.563e-16		AO090012001022	4	2648595	2652049	3454	20295.2	-1.72	0.2	2.621e-18	1.481e-17
AO090026000187	3	4594841	4597160	2319	195.9	-2.98	0.37	5.187e-17	2.6e-16		AO090001000394	2	991136	993860	2724	83.35	-2.54	0.3	2.627e-18	1.484e-17
AO090010000593	8	1831025	1833135	2110	83.75	-2.84	0.35	5.208e-17	2.609e-16		AO090701000177	5	1869391	1871091	1700	151.88	-3.19	0.38	2.808e-18	1.586e-17
AO090001000092	2	203834	205543	1709	248.55	1.11	0.14	5.46e-17	2.732e-16		AO090005001109	1	3480143	3482411	2268	120.72	-2.38	0.28	2.863e-18	1.616e-17
AO090003000067	2	2269871	2270518	647	81.66	1.89	0.23	5.467e-17	2.735e-16		AO090102000183	4	4059194	4059950	756	455.47	1.37	0.16	2.934e-18	1.655e-17
AO090701000214	5	1770998	1772351	1353	34069.7	1.1	0.13	5.797e-17	2.899e-16		AO090003000214	2	2658150	2658825	675	710.51	-1.93	0.23	2.937e-18	1.656e-17
AO090001000297	2	761792	763682	1890	2663.66	1.13	0.14	5.992e-17	2.995e-16		AO090012000983	4	2545545	2546950	1405	1142.46	1.26	0.15	3.006e-18	1.694e-17
AO090005001593	1	2169125	2170253	1128	4156.32	-2.13	0.26	6.473e-17	3.234e-16		AO090005001122	1	3437400	3438832	1432	6364.99	1.33	0.15	3.019e-18	1.7e-17
AO090011000890	7	2275094	2277266	2172	229.2	1.13	0.14	6.564e-17	3.278e-16		AO090102000079	4	4332954	4334676	1722	2095.31	-1.92	0.23	3.052e-18	1.718e-17
AO090701000625	5	713422	717163	3741	2617.81	-1.23	0.15	6.625e-17	3.307e-16		AO090701000626	5	712167	712956	789	756.4	-1.88	0.22	3.225e-18	1.815e-17
AO090038000404	6	2584739	2586183	1444	4137.09	1.31	0.16	6.883e-17	3.429e-16		AO090023000314	3	796640	797352	712	1666.76	1.29	0.15	3.294e-18	1.852e-17
AO090120000471	5	3952521	3953775	1254	342.3	-1.11	0.14	6.99e-17	3.48e-16		AO090009000104	1	291653	292907	1254	130.32	-2.13	0.25	3.503e-18	1.969e-17
AO090011000427	7	1084416	1084908	492	9841.9	-1.8	0.22	7.469e-17	3.714e-16		AO090005001276	1	3038867	3042185	3318	10780.8	1.03	0.12	3.508e-18	1.97e-17
AO090005000817	1	4230315	4231513	1198	5257.69	-3.41	0.43	7.855e-17	3.903e-16		AO090038000542	6	2196436	2202974	6538	638.25	-1.47	0.17	3.544e-18	1.99e-17
AO090023000643	3	1686331	1688481	2150	227.22	-1.27	0.16	8.097e-17	4.021e-16		AO090011000372	7	951272	953009	1737	555.35	-1.69	0.2	3.648e-18	2.047e-17
AO090001000273	2	682447	683787	1340	978.76	-1.14	0.14	8.204e-17	4.071e-16		AO090701000415	5	1248404	1249651	1247	100.4	-6.16	0.74	3.838e-18	2.153e-17
AO090103000448	8	136273	137557	1284	90.74	-1.73	0.21	8.22e-17	4.077e-16		AO090026000120	3	4779097	4780315	1218	136.56	4.14	0.49	3.891e-18	2.181e-17
AO090001000313	2	800151	803968	3817	869.04	-1.87	0.23	8.559e-17	4.243e-16		AO090138000055	6	4083906	4085029	1123	602.96	-4.43	0.53	3.977e-18	2.229e-17
AO090026000480	3	3765962	3769496	3534	779.38	1.09	0.13	8.576e-17	4.25e-16		AO090009000215	1	581499	583949	2450	5952.25	1.24	0.15	4.095e-18	2.293e-17
AO090012000432	4	1080513	1081775	1262	52.23	2.58	0.32	8.596e-17	4.258e-16		AO090026000668	3	3276714	3277514	800	809.59	-2.05	0.24	4.316e-18	2.416e-17
AO090102000361	4	3546840	3549185	2345	9192.84	-1.63	0.2	8.609e-17	4.263e-16		AO090023000665	3	1751701	1752627	926	2697.81	1.26	0.15	4.362e-18	2.44e-17
AO090026000069	3	4945172	4945851	679	429.25	-2.74	0.34	8.634e-17	4.273e-16		AO090701000466	5	1126848	1128310	1462	55.54	-4.21	0.5	4.596e-18	2.57e-17
AO090005000131	1	6093762	6095002	1240	535.42	-1.06	0.13	8.707e-17	4.307e-16		AO090010000015	8	3357497	3359215	1718	6400.3	-3.01	0.36	4.618e-18	2.581e-17
AO090113000061	5	4193803	4195860	2057	48.07	-2.92	0.36	8.731e-17	4.317e-16		AO090026000369	3	4061818	4062673	855	710.88	1.15	0.13	4.774e-18	2.667e-17
AO090011000356	7	911862	913174	1312	1535.24	1.15	0.14	8.99e-17	4.444e-16		AO090003000798	2	4226578	4229235	2657	1207.51	2.22	0.26	4.977e-18	2.779e-17
AO090102000015	4	4501661	4503590	1929	3339.15	1.07	0.13	9.002e-17	4.448e-16		AO090005000584	1	4897554	4898340	786	50.42	5.11	0.61	5.065e-18	2.827e-17
AO090026000775	3	3017602	3019486	1884	4588.58	-1.21	0.15	9.197e-17	4.542e-16		AO090102000389	4	3460242	3464337	4095	5641.64	1.62	0.19	5.171e-18	2.885e-17
AO090003001145	2	5224344	5225310	966	439.55	1.63	0.2	9.985e-17	4.929e-16		AO090023000127	3	320581	322624	2043	4178	1.85	0.22	5.325e-18	2.969e-17
AO090103000125	8	934223	936433	2210	118.38	-1.53	0.19	1.008e-16	4.973e-16		AO090005001412	1	2687808	2688798	990	7502.86	1.1	0.13	5.758e-18	3.209e-17
AO090026000250	3	4415278	4416932	1654	953.06	1.17	0.14	1.048e-16	5.167e-16		AO090011000679	7	1744590	1746152	1562	17564.4	2.23	0.27	5.776e-18	3.217e-17
AO090120000106	5	2945022	2946786	1764	263.65	-1.66	0.21	1.095e-16	5.4e-16		AO090003000429	2	3226111	3226751	640	178.92	-1.85	0.22	5.826e-18	3.243e-17
AO090038000505	6	2311978	2312738	760	630.61	-2.18	0.27	1.104e-16	5.441e-16		AO090012000158	4	378284	380142	1858	301.19	-2.18	0.26	6.212e-18	3.456e-17
AO090023000141	3	357872	359126	1254	10808.7	1.6	0.2	1.169e-16	5.752e-16		AO090012000073	4	175489	176252	763	245.32	-1.76	0.21	6.221e-18	3.46e-17
AO090011000230	7	588648	590157	1509	26062.2	1.85	0.23	1.219e-16	5.993e-16		AO090001000453	2	1155476	1158603	3127	2772.39	1.15	0.13	6.322e-18	3.514e-17
AO090005001634	1	2062639	2065603	2964	5876.76	1.52	0.19	1.231e-16	6.049e-16		AO090023000125	3	315903	317351	1448	4953.09	1.49	0.18	6.41e-18	3.561e-17
AO090026000681	3	3248477	3249233	756	45.01	-3.26	0.41	1.236e-16	6.069e-16		AO090701000469	5	1116969	1118750	1781	104.28	-3.35	0.4	6.465e-18	3.59e-17
[truncated: 2,554 more rows]

## Sheet: Table S2
Table S2
Ferulic acid
1 h											24 h
Gene	chr	start	end	length	baseMean	log2FoldChange	lfcSE	pvalue	padj		Gene	chr	start	end	length	baseMean	log2FoldChange	lfcSE	pvalue	padj
AO090001000377	2	949290	951115	1825	9827.02	2.35	0.06	0	0		AO090001000406	2	1014837	1016349	1512	7600.3	5.3	0.13	0	0
AO090001000415	2	1051300	1052636	1336	28156.5	3.1	0.08	0	0		AO090001000549	2	1431881	1433768	1887	7508.14	-5.87	0.15	0	0
AO090003000241	2	2733174	2734189	1015	25732.2	2.77	0.06	0	0		AO090003000077	2	2297826	2299770	1944	19544.1	-11.43	0.3	0	0
AO090003000398	2	3149445	3150301	856	35343.7	4.34	0.07	0	0		AO090003000661	2	3868579	3870542	1963	177004	9.27	0.25	0	0
AO090003000481	2	3384500	3386955	2455	22105.9	3.59	0.07	0	0		AO090003000831	2	4331383	4332925	1542	8572.48	7.76	0.18	0	0
AO090003000644	2	3825098	3826367	1269	7777.72	3.86	0.1	0	0		AO090003001507	2	6130841	6131798	957	22394.8	-10.15	0.26	0	0
AO090003000839	2	4357394	4359605	2211	9968.06	4.28	0.07	0	0		AO090005000125	1	6109651	6110934	1283	12183.2	-6.53	0.15	0	0
AO090003000996	2	4797812	4799495	1683	6799.55	2.42	0.06	0	0		AO090005000962	1	3847623	3849625	2002	70868.4	-11.81	0.24	0	0
AO090003001032	2	4876447	4877736	1289	5056.9	-2.59	0.07	0	0		AO090005001458	1	2566900	2570347	3447	19298.9	-5.33	0.12	0	0
AO090003001250	2	5491379	5492446	1067	6672.06	3.63	0.08	0	0		AO090005001567	1	2232243	2234034	1791	4116.15	3.82	0.09	0	0
AO090005000099	1	6176450	6177869	1419	3275.65	3.39	0.08	0	0		AO090009000036	1	103101	103689	588	4952.37	-7.15	0.18	0	0
AO090005000414	1	5365160	5365661	501	6007.18	5.81	0.11	0	0		AO090009000055	1	159675	164008	4333	19241.7	6.52	0.12	0	0
AO090005000534	1	5029090	5030560	1470	5682.6	-5.9	0.14	0	0		AO090009000314	1	837656	839475	1819	34062.2	-4.96	0.12	0	0
AO090005000739	1	4451701	4452360	659	35131.7	4.23	0.09	0	0		AO090009000356	1	948748	951639	2891	75430.4	-5.72	0.15	0	0
AO090005000804	1	4263257	4265819	2562	4011.86	3.68	0.09	0	0		AO090009000634	1	1692244	1693446	1202	128469	5.36	0.13	0	0
AO090005000817	1	4230315	4231513	1198	4703.07	-5.75	0.14	0	0		AO090010000746	8	1450562	1452601	2039	6892.82	-5.25	0.14	0	0
AO090005001149	1	3374622	3376029	1407	8898.41	6.33	0.1	0	0		AO090011000119	7	338251	339073	822	187927	-9.17	0.17	0	0
AO090005001183	1	3291750	3293338	1588	2570.37	-4.57	0.12	0	0		AO090011000352	7	903352	905295	1943	9297.15	-7.81	0.2	0	0
AO090005001280	1	3022637	3023359	722	40474.4	3.51	0.08	0	0		AO090011000598	7	1517315	1520107	2792	6707	6.75	0.17	0	0
AO090005001339	1	2846333	2846826	493	1318.61	4.11	0.1	0	0		AO090012000174	4	424042	424507	465	12770	4.92	0.11	0	0
AO090005001529	1	2350599	2351646	1047	4935.26	3.62	0.09	0	0		AO090012000623	4	1591520	1593260	1740	22434.9	10.28	0.19	0	0
AO090005001652	1	2003854	2005030	1176	10293.6	2.75	0.06	0	0		AO090012000624	4	1594699	1598460	3761	151143	11.99	0.14	0	0
AO090009000063	1	179199	180216	1017	2796.01	-3.8	0.1	0	0		AO090020000216	6	1282636	1284253	1617	17430.3	-9.04	0.23	0	0
AO090009000094	1	271779	272312	533	1033.91	5.58	0.14	0	0		AO090023000599	3	1578633	1579104	471	60857.7	9.5	0.18	0	0
AO090009000153	1	413318	414260	942	1322.92	6.17	0.16	0	0		AO090023000799	3	2073297	2073768	471	19839.2	-7.83	0.17	0	0
AO090009000289	1	767044	768241	1197	83542.7	4.12	0.09	0	0		AO090026000175	3	4624283	4624663	380	190211	-5.4	0.12	0	0
AO090009000465	1	1224145	1225075	930	1791.87	5.55	0.12	0	0		AO090026000183	3	4606561	4607388	827	2423.49	5.59	0.15	0	0
AO090009000637	1	1699448	1701480	2032	2675.18	2.74	0.07	0	0		AO090026000494	3	3729524	3731320	1796	57970.2	9.82	0.18	0	0
AO090010000363	8	2387961	2388837	876	1881.1	4.41	0.11	0	0		AO090026000606	3	3433746	3435916	2170	2941.6	3.95	0.1	0	0
AO090010000427	8	2241690	2243093	1403	2485.61	-3.78	0.09	0	0		AO090038000471	6	2400020	2405022	5002	31017.7	-9.35	0.18	0	0
AO090010000448	8	2191732	2192368	636	18518.1	4.51	0.1	0	0		AO090103000465	8	101827	102528	701	5529.1	-4.54	0.12	0	0
AO090010000669	8	1648055	1648879	824	2780.7	-5.16	0.13	0	0		AO090120000052	5	2797912	2801326	3414	23857.2	-5.16	0.12	0	0
AO090010000722	8	1523832	1526088	2256	22762.6	7.15	0.09	0	0		AO090120000196	5	3178957	3181001	2044	5131.59	-7.58	0.19	0	0
AO090011000114	7	319125	323335	4210	5590.03	-2.78	0.07	0	0		AO090701000685	5	568158	569661	1503	11612.2	5.14	0.12	0	0
AO090011000235	7	603016	604952	1936	6777.72	-4.95	0.12	0	0		AO090701000738	5	414945	415644	699	1718.64	7.31	0.2	9.659e-304	3.127e-301
AO090011000275	7	706504	707971	1467	3360.89	4.22	0.09	0	0		AO090102000470	4	3245946	3247785	1839	11316.5	-3.82	0.1	5.258e-303	1.655e-300
AO090011000381	7	973978	975500	1522	10234.6	2.82	0.07	0	0		AO090102000360	4	3550577	3551808	1231	197858	4.54	0.12	1.105e-302	3.384e-300
AO090011000472	7	1187085	1188561	1476	16234.2	-5.5	0.12	0	0		AO090010000524	8	1989476	1991103	1627	5528.27	-7.11	0.19	7.352e-298	2.192e-295
AO090012000247	4	604544	605108	564	24445.2	5.99	0.09	0	0		AO090003001247	2	5485703	5487288	1585	8321.86	-7.45	0.2	6.363e-293	1.849e-290
AO090012000371	4	917722	918142	420	708.32	4.77	0.12	0	0		AO090012000998	4	2585926	2587307	1381	24247.1	4.99	0.14	1.721e-292	4.874e-290
AO090012000452	4	1134660	1136178	1518	8188.45	3.62	0.08	0	0		AO090003001390	2	5850804	5853273	2469	16098.2	3.21	0.09	1.902e-291	5.257e-289
AO090012000768	4	1967507	1969089	1582	7982.77	3.01	0.08	0	0		AO090020000573	6	362208	364330	2122	3697.51	-6.3	0.17	4.741e-291	1.279e-288
AO090012000949	4	2468301	2469918	1617	3500.86	3.92	0.09	0	0		AO090005000447	1	5260732	5261816	1084	13624.1	-7.29	0.2	2.388e-287	6.293e-285
AO090020000109	6	1530564	1531575	1011	6710.15	3.48	0.09	0	0		AO090003000638	2	3816650	3819377	2727	19278.6	-5.57	0.15	4.47e-285	1.151e-282
AO090020000191	6	1340355	1341156	801	3906.57	3.67	0.09	0	0		AO090012000109	4	267771	270241	2470	6358.44	-5.91	0.16	7.747e-284	1.951e-281
AO090020000351	6	955157	956970	1813	7922.98	-3.34	0.07	0	0		AO090011000052	7	167015	168338	1323	5568.17	-8.63	0.24	2.324e-277	5.725e-275
AO090020000424	6	767689	768583	894	91666.9	6.95	0.14	0	0		AO090102000538	4	3064765	3066544	1779	3270.52	-4.6	0.13	4.683e-277	1.129e-274
AO090020000603	6	295044	296856	1812	7583.02	4.2	0.08	0	0		AO090005001411	1	2689450	2690712	1262	11861.5	-6.94	0.2	2.776e-276	6.554e-274
AO090020000687	6	82961	83637	676	6180.65	3.91	0.1	0	0		AO090103000448	8	136273	137557	1284	7448.83	-7.18	0.2	1.509e-275	3.489e-273
AO090023000200	3	500033	501327	1294	1732	3.71	0.1	0	0		AO090012000328	4	802188	806884	4696	14633.1	-6.72	0.19	1.95e-275	4.42e-273
AO090023000260	3	669259	670320	1061	1230.72	5.77	0.12	0	0		AO090023000944	3	2488463	2490507	2044	5475.33	-7.36	0.21	2.169e-273	4.818e-271
AO090023000335	3	858081	858990	909	5774.22	5.02	0.11	0	0		AO090009000417	1	1099008	1100658	1650	6864.89	-3.73	0.11	3.191e-273	6.953e-271
AO090023000443	3	1125762	1127004	1242	5610.78	4.16	0.09	0	0		AO090005001107	1	3485096	3486255	1159	3954.06	7.34	0.21	1.369e-270	2.927e-268
AO090023000581	3	1537374	1539054	1680	4315.72	5.71	0.09	0	0		AO090701000752	5	380941	382419	1478	6431.61	8.44	0.24	1.369e-268	2.874e-266
AO090023000592	3	1567352	1568399	1047	7337.97	2.78	0.07	0	0		AO090206000001	7	2587704	2589522	1818	14701.5	3.98	0.11	9.788e-267	2.016e-264
AO090023000614	3	1611514	1613421	1907	6163.68	-3.73	0.09	0	0		AO090009000566	1	1487943	1488845	902	7803.55	-4.54	0.13	1.556e-265	3.148e-263
AO090023000687	3	1806771	1807770	999	6365.51	3.39	0.09	0	0		AO090020000495	6	561891	564533	2642	11116.8	-6.01	0.17	3.664e-265	7.285e-263
AO090023000756	3	1978780	1980611	1831	7894.52	2.25	0.06	0	0		AO090023000951	3	2518120	2519556	1436	3067.55	-3.96	0.11	1.781e-262	3.479e-260
AO090023000832	3	2170598	2172005	1407	2013.07	4	0.1	0	0		AO090003000045	2	2211195	2211962	767	6965.27	-4.44	0.13	4.477e-262	8.599e-260
AO090023000857	3	2237413	2238653	1240	8249.61	3.3	0.09	0	0		AO090001000162	2	369132	370660	1528	10615.7	-3.53	0.1	1.824e-259	3.444e-257
AO090026000697	3	3214545	3215331	786	3233.37	3.02	0.07	0	0		AO090701000347	5	1413385	1415021	1636	3501.33	-5.52	0.16	1.624e-255	3.017e-253
AO090026000719	3	3156914	3158751	1837	8317.99	2.94	0.08	0	0		AO090023000318	3	809834	810977	1143	2884.74	9.45	0.28	7.906e-253	1.445e-250
AO090026000741	3	3093106	3094738	1632	6955.08	-4.69	0.11	0	0		AO090038000395	6	2622988	2624374	1386	141648	4.62	0.14	2.851e-250	5.127e-248
AO090026000812	3	2904455	2906942	2487	8942.12	-5.43	0.11	0	0		AO090020000639	6	199282	200960	1678	1998.61	9.05	0.27	9.07e-246	1.606e-243
AO090038000108	6	3392481	3393699	1218	5000.02	-5.41	0.12	0	0		AO090003000666	2	3885346	3887151	1805	2018.21	4.24	0.13	5.593e-242	9.749e-240
AO090102000065	4	4377099	4378767	1668	4738.49	3	0.07	0	0		AO090672000001	3	2666763	2667659	896	9269.23	-4.57	0.14	1.044e-239	1.792e-237
AO090102000173	4	4087278	4088668	1390	9367.33	3.66	0.09	0	0		AO090102000473	4	3243572	3244293	721	4865.66	-3.67	0.11	2.475e-239	4.186e-237
AO090102000246	4	3883695	3884497	802	55957.7	-5.49	0.1	0	0		AO090003000208	2	2647775	2649135	1360	25967.5	-6.92	0.21	5.054e-239	8.422e-237
AO090102000339	4	3604260	3605719	1459	36833.8	4.11	0.09	0	0		AO090102000092	4	4309554	4310337	783	15342.1	-4.04	0.12	3.633e-238	5.967e-236
AO090102000525	4	3095389	3097080	1691	6812.53	3.27	0.09	0	0		AO090023000624	3	1637284	1638454	1170	6550.04	6.34	0.19	6.528e-238	1.057e-235
AO090102000538	4	3064765	3066544	1779	23798.3	6.2	0.14	0	0		AO090020000635	6	205296	206516	1220	1535.88	5.46	0.17	2.119e-235	3.382e-233
AO090102000539	4	3061004	3062483	1479	7731.04	2.8	0.07	0	0		AO090701000359	5	1385153	1386797	1644	83870.2	4.8	0.15	7.872e-234	1.239e-231
AO090102000588	4	2934891	2935975	1084	14214.1	-5.3	0.11	0	0		AO090005000817	1	4230315	4231513	1198	21492.7	-5.25	0.16	1.434e-232	2.225e-230
AO090103000133	8	914563	915392	829	2259.97	3.96	0.1	0	0		AO090038000281	6	2925321	2927010	1689	9874.65	6.98	0.22	3.627e-231	5.554e-229
AO090113000007	5	4062870	4066616	3746	4582.07	-3.69	0.08	0	0		AO090166000076	4	4773025	4774908	1883	16144.6	7.74	0.24	7.891e-231	1.192e-228
AO090113000109	5	4310461	4311524	1063	5863.2	3.53	0.07	0	0		AO090005001239	1	3137858	3138299	441	6389.14	7.54	0.23	1.074e-227	1.601e-225
AO090120000022	5	2738080	2738971	891	1363.35	5.1	0.13	0	0		AO090120000106	5	2945022	2946786	1764	17481.7	-8.28	0.26	2.408e-227	3.543e-225
AO090120000068	5	2840738	2843209	2471	82000.7	4.82	0.1	0	0		AO090003000548	2	3552362	3553172	810	884.92	4.48	0.14	2.145e-224	3.116e-222
AO090120000112	5	2959173	2959864	691	156174	2.66	0.06	0	0		AO090038000108	6	3392481	3393699	1218	16276.7	-7.45	0.23	9.37e-224	1.344e-221
AO090120000370	5	3660114	3661319	1205	7258.95	-6.14	0.12	0	0		AO090026000794	3	2974288	2976287	1999	5517.82	4.47	0.14	2.65e-223	3.754e-221
AO090120000371	5	3661942	3663103	1161	7414.01	-5.47	0.12	0	0		AO090005001300	1	2935544	2937309	1765	56686.8	4.26	0.13	1.238e-222	1.731e-220
AO090120000396	5	3740549	3742624	2075	77397.2	5.59	0.11	0	0		AO090020000109	6	1530564	1531575	1011	3356.42	4.95	0.16	2.71e-222	3.744e-220
AO090120000504	5	4029357	4030599	1242	1293.29	6.43	0.15	0	0		AO090023000614	3	1611514	1613421	1907	15622	-5.42	0.17	1.171e-221	1.598e-219
AO090138000059	6	4072491	4073171	680	1983.01	5.08	0.13	0	0		AO090010000621	8	1764726	1765875	1149	2100.04	-7.21	0.23	1.045e-219	1.409e-217
AO090138000084	6	4023713	4024182	469	786.92	5.04	0.13	0	0		AO090023000099	3	247704	249339	1635	11201	3.63	0.12	2.005e-219	2.672e-217
AO090166000084	4	4791607	4793604	1997	11478.4	-3.08	0.08	0	0		AO090005001192	1	3274106	3275198	1092	22687.3	3.55	0.11	5.148e-218	6.782e-216
AO090166000087	4	4798825	4800712	1887	3977.41	6.73	0.11	0	0		AO090012000809	4	2075512	2076739	1227	20858.3	-3.09	0.1	6e-218	7.815e-216
AO090206000080	7	2796991	2799027	2036	3011.94	-4.04	0.1	0	0		AO090023000467	3	1198894	1200455	1561	69386.3	-4.94	0.16	4.432e-217	5.706e-215
AO090701000127	5	2001444	2001814	370	2897.45	3.15	0.07	0	0		AO090011000917	7	2392786	2395052	2266	2647.13	-4.23	0.14	9.684e-217	1.233e-214
AO090701000360	5	1383960	1385016	1056	13102.8	-6.08	0.1	0	0		AO090003000475	2	3367993	3371814	3821	1239.08	-4.58	0.15	3.726e-215	4.692e-213
AO090701000398	5	1292209	1293668	1459	33558.9	-4.95	0.11	0	0		AO090005000228	1	5830465	5832366	1901	6117.18	-8.86	0.28	1.537e-214	1.914e-212
AO090701000429	5	1208958	1210191	1233	1698.63	4.26	0.09	0	0		AO090023000033	3	88576	89245	669	3200.99	9.27	0.3	5.596e-212	6.892e-210
AO090701000579	5	818012	820402	2390	12925.4	-3.35	0.08	0	0		AO090012000169	4	402636	403530	894	1682.98	8.25	0.27	4.873e-211	5.937e-209
AO090701000601	5	770098	774234	4136	3464.58	-3.57	0.09	0	0		AO090003000175	2	2570991	2572006	1015	9873.59	-8.65	0.28	5.421e-211	6.535e-209
AO090701000682	5	576196	578259	2063	10775.4	4.71	0.07	0	0		AO090023000140	3	356160	357504	1344	14044.8	4.31	0.14	6.194e-211	7.388e-209
AO090701000752	5	380941	382419	1478	14809.5	2.51	0.06	0	0		AO090010000444	8	2197556	2200018	2462	26460.7	3.44	0.11	1.294e-208	1.527e-206
AO090012000311	4	769998	770726	728	2180.55	-3.47	0.09	5.401e-305	6.467e-303		AO090010000289	8	2607694	2608228	534	2607.87	-7.14	0.23	2.676e-208	3.126e-206
AO090012000395	4	973701	974882	1181	1076.42	3.71	0.1	3.769e-304	4.467e-302		AO090010000714	8	1540591	1541935	1344	887.98	7.25	0.24	1.874e-206	2.166e-204
AO090010000445	8	2195493	2196517	1024	21415.7	5.6	0.15	1.213e-302	1.423e-300		AO090001000141	2	314331	315876	1545	754.83	6.73	0.22	3.426e-204	3.921e-202
AO090009000282	1	747874	749551	1677	10564.9	-3.75	0.1	1.339e-300	1.555e-298		AO090023000412	3	1055420	1056278	858	1088.46	6.19	0.21	1.425e-201	1.614e-199
AO090003000439	2	3261088	3262015	927	8677.02	3.79	0.1	2.425e-300	2.789e-298		AO090020000493	6	566387	568008	1621	6920.86	-3.79	0.13	8.969e-201	1.006e-198
AO090001000500	2	1283602	1285534	1932	4213.45	2.33	0.06	3.056e-300	3.479e-298		AO090011000649	7	1685837	1687535	1698	1456.91	8.91	0.3	1.036e-200	1.151e-198
AO090010000340	8	2447299	2449114	1815	3406.44	-5.89	0.16	1.038e-298	1.171e-296		AO090003000090	2	2327788	2328830	1042	320429	4.08	0.14	4.438e-198	4.882e-196
AO090102000613	4	2871824	2874692	2868	2547.28	2.65	0.07	1.283e-297	1.433e-295		AO090009000405	1	1073624	1074930	1306	157736	2.94	0.1	2.031e-195	2.213e-193
AO090009000468	1	1234018	1235040	1022	985.47	4.15	0.11	2.74e-295	3.031e-293		AO090003001259	2	5515531	5517736	2205	6545.61	-9.57	0.32	3.744e-194	4.04e-192
AO090020000048	6	1686334	1687039	705	3237.34	2.63	0.07	1.125e-294	1.233e-292		AO090012000137	4	334018	335556	1538	18452.6	-7.18	0.24	1.139e-193	1.217e-191
AO090012000511	4	1302024	1305927	3903	6337.75	2.59	0.07	1.163e-294	1.262e-292		AO090005001315	1	2903478	2905672	2194	9258.96	4.56	0.16	4.535e-191	4.802e-189
AO090026000708	3	3183583	3184022	439	85107.5	2.97	0.08	6.645e-292	7.145e-290		AO090003000211	2	2652999	2654295	1296	14253.3	-7.34	0.25	9.023e-191	9.466e-189
AO090038000427	6	2531303	2531951	648	4001.12	3.09	0.09	1.148e-290	1.224e-288		AO090138000201	6	3705626	3707696	2070	1111.72	-3.72	0.13	3.323e-190	3.454e-188
AO090120000256	5	3350388	3351030	642	80108.9	2.96	0.08	1.962e-288	2.071e-286		AO090701000314	5	1517639	1519815	2176	6217.94	-8.74	0.3	8.836e-190	9.101e-188
AO090023000382	3	981293	984697	3404	16667	-2.66	0.07	2.198e-286	2.3e-284		AO090003000571	2	3618149	3620453	2304	14004.6	3.05	0.1	6.541e-188	6.677e-186
AO090026000571	3	3520950	3523224	2274	13974	2.81	0.08	1.385e-285	1.436e-283		AO090023000518	3	1350474	1352066	1592	18921.6	-2.91	0.1	7.16e-187	7.244e-185
AO090001000684	2	1802748	1803468	720	5868.36	-2.82	0.08	1.516e-282	1.558e-280		AO090003000547	2	3550023	3551537	1514	611.79	5.25	0.18	1.847e-186	1.852e-184
AO090026000179	3	4616230	4616785	555	4690.78	3.28	0.09	5.769e-281	5.878e-279		AO090102000076	4	4345845	4347202	1357	1709.34	-5.3	0.18	5.274e-186	5.242e-184
AO090012000312	4	770805	771695	890	1761.09	-3.87	0.11	5.355e-279	5.408e-277		AO090003000354	2	3046012	3047591	1579	56702.4	-5	0.17	1.333e-185	1.313e-183
AO090010000644	8	1708315	1709569	1254	92127.4	-3.01	0.08	2.99e-278	2.993e-276		AO090003001171	2	5278396	5280020	1624	28773.2	3.79	0.13	1.558e-185	1.522e-183
AO090011000231	7	592016	593680	1664	3079.97	-3.13	0.09	1.756e-277	1.743e-275		AO090023000896	3	2345727	2347975	2248	13564	6.44	0.22	7.386e-182	7.153e-180
AO090102000290	4	3740533	3741723	1190	5199.22	3.23	0.09	8.682e-277	8.545e-275		AO090166000107	4	4848412	4850099	1687	742.36	3.99	0.14	2.156e-178	2.07e-176
AO090103000206	8	753177	754181	1004	2980.28	-4.54	0.13	1.206e-275	1.177e-273		AO090003001096	2	5074315	5075566	1251	2361.83	6.24	0.22	7.302e-178	6.953e-176
AO090005000692	1	4599453	4601443	1990	4236.64	-7.58	0.21	1.583e-275	1.532e-273		AO090026000394	3	4002799	4004349	1550	5550.42	5.66	0.2	2.037e-177	1.923e-175
AO090023001002	3	2644965	2645593	628	6802.16	2.51	0.07	1.902e-274	1.825e-272		AO090001000555	2	1452923	1454299	1376	5490.9	-3.71	0.13	4.067e-177	3.808e-175
AO090003001482	2	6050663	6053467	2804	1691.66	-3.77	0.11	2.08e-274	1.98e-272		AO090103000447	8	138211	139807	1596	4025.43	-7.72	0.27	8.744e-177	8.121e-175
AO090003000135	2	2457262	2460057	2795	4539.3	-2.7	0.08	1.272e-273	1.201e-271		AO090010000219	8	2814512	2819239	4727	1740.03	3.55	0.13	3.097e-176	2.853e-174
AO090023000625	3	1640663	1641268	605	807.42	3.42	0.1	5.237e-273	4.905e-271		AO090001000431	2	1083566	1084736	1170	3067.52	-5.43	0.19	1.798e-175	1.643e-173
AO090001000146	2	326184	327831	1647	6200.99	-3.37	0.1	2.835e-268	2.634e-266		AO090005001282	1	3012957	3015081	2124	23259	-3.67	0.13	2.131e-175	1.932e-173
AO090010000726	8	1515509	1516844	1335	772.63	3.78	0.11	8.593e-268	7.92e-266		AO090012000465	4	1160372	1162294	1922	11554.5	-11.04	0.39	1.046e-174	9.403e-173
AO090038000255	6	2993413	2995831	2418	1413.55	-3.56	0.1	1.047e-267	9.574e-266		AO090012000555	4	1408184	1409681	1497	1246.78	-4.23	0.15	1.494e-174	1.333e-172
AO090012000998	4	2585926	2587307	1381	55721	3.66	0.11	8.345e-267	7.572e-265		AO090701000046	5	2229104	2230385	1281	24533.5	-7.52	0.27	1.54e-174	1.363e-172
AO090020000288	6	1103833	1105769	1936	2067.86	-4.86	0.14	8.623e-264	7.763e-262		AO090005000758	1	4411837	4412601	764	1780.87	3.93	0.14	4.884e-174	4.29e-172
AO090023000467	3	1198894	1200455	1561	37952.1	-4.16	0.12	9.225e-262	8.241e-260		AO090003000210	2	2650980	2652488	1508	16243.5	-7.97	0.28	1.819e-173	1.585e-171
AO090003000250	2	2755413	2756292	879	822.98	3.46	0.1	4.221e-261	3.742e-259		AO090001000590	2	1547450	1548328	878	4751.26	-4.02	0.14	1.442e-172	1.238e-170
AO090701000069	5	2164456	2164873	417	2497.01	2.8	0.08	1.191e-260	1.048e-258		AO090023000949	3	2509741	2510691	950	517.42	4.39	0.16	1.435e-172	1.238e-170
AO090012000212	4	532710	533802	1092	1855.95	3.01	0.09	5.785e-260	5.051e-258		AO090011000630	7	1618455	1622275	3820	15406.2	4.42	0.16	5.018e-172	4.275e-170
AO090005001442	1	2614719	2615968	1249	7559.64	2.36	0.07	1.863e-259	1.615e-257		AO090005000616	1	4819500	4820758	1258	2796.69	3.42	0.12	2.681e-171	2.267e-169
AO090011000209	7	544257	545169	912	820.41	3.72	0.11	5.328e-258	4.583e-256		AO090023000749	3	1959680	1961031	1351	844.25	-4.22	0.15	3.097e-171	2.599e-169
AO090005000830	1	4193081	4195329	2248	5509.42	2.84	0.08	3.253e-257	2.778e-255		AO090103000020	8	1214991	1216273	1282	1550.06	-4.17	0.15	2.246e-170	1.871e-168
AO090023000021	3	55158	56100	942	3497.37	4.2	0.12	6.599e-257	5.594e-255		AO090102000627	4	2835275	2837167	1892	32579.1	3.28	0.12	1.006e-168	8.323e-167
AO090023000909	3	2382527	2385104	2577	7051.71	2.13	0.06	1.3e-256	1.094e-254		AO090102000471	4	3245224	3245857	633	4844.69	-3.87	0.14	9.561e-168	7.85e-166
AO090026000355	3	4105197	4107429	2232	4028.34	-3.16	0.09	1.438e-256	1.202e-254		AO090011000513	7	1284916	1286908	1992	5012.57	3.9	0.14	1.123e-167	9.156e-166
AO090701000359	5	1385153	1386797	1644	65649.9	2.95	0.09	5.029e-255	4.172e-253		AO090005000818	1	4229513	4230260	747	2490.13	-5.36	0.2	4.559e-167	3.69e-165
AO090009000129	1	345725	346765	1040	738.47	6.14	0.18	5.443e-255	4.484e-253		AO090011000870	7	2223308	2225253	1945	9653.1	-5.33	0.19	8.862e-167	7.122e-165
AO090009000314	1	837656	839475	1819	19854.5	-4.15	0.12	3.92e-254	3.206e-252		AO090020000314	6	1046383	1047582	1199	11038.6	3.51	0.13	1.224e-166	9.771e-165
AO090020000558	6	405771	406790	1019	4261.33	-2.56	0.08	1.163e-250	9.445e-249		AO090038000537	6	2218419	2220353	1934	13402.9	-3.23	0.12	1.755e-166	1.391e-164
AO090011000922	7	2409945	2413810	3865	2117.66	-3.36	0.1	3.271e-250	2.638e-248		AO090023000919	3	2409082	2411066	1984	8464.37	-6.75	0.25	3.756e-165	2.956e-163
AO090003000661	2	3868579	3870542	1963	501754	3.85	0.11	2.485e-249	1.99e-247		AO090003001248	2	5487772	5489178	1406	2706.29	-7.58	0.28	5.215e-164	4.075e-162
AO090020000688	6	81898	82725	827	11137.5	4.62	0.14	2.759e-249	2.194e-247		AO090102000152	4	4145489	4147231	1742	2932.32	-3.41	0.13	6.161e-164	4.781e-162
AO090012000809	4	2075512	2076739	1227	4280.12	-4.14	0.12	3.819e-249	3.017e-247		AO090102000514	4	3127614	3128788	1174	1190.48	-4.18	0.15	1.175e-163	9.056e-162
AO090009000304	1	809737	810952	1215	4645.03	2.92	0.09	1.478e-248	1.16e-246		AO090023000910	3	2385848	2387890	2042	1628.72	3.14	0.12	2.572e-163	1.969e-161
AO090102000497	4	3178374	3180484	2110	7395.72	2.42	0.07	1.368e-247	1.066e-245		AO090005001084	1	3549772	3552746	2974	7149.64	-4.96	0.18	1.259e-162	9.575e-161
AO090701000318	5	1504420	1506509	2089	5173.33	2.49	0.07	6.587e-247	5.1e-245		AO090011000744	7	1901070	1902838	1768	49469	-8.06	0.3	2.109e-162	1.593e-160
AO090012000447	4	1120342	1120734	392	9225.45	2.99	0.09	1.34e-245	1.031e-243		AO090003001417	2	5911733	5913030	1297	1323.92	-7.06	0.26	2.168e-162	1.627e-160
AO090003000207	2	2646939	2647407	468	2642.28	4.16	0.13	6.128e-242	4.683e-240		AO090012000029	4	60880	62392	1512	6419.15	-10.32	0.38	2.834e-162	2.112e-160
AO090005000631	1	4767004	4767808	804	9250.99	5.09	0.15	1.035e-241	7.854e-240		AO090001000224	2	540351	541810	1459	12089.8	3.89	0.14	3.338e-162	2.472e-160
AO090120000058	5	2816285	2820334	4049	1411.13	-3.77	0.11	2.072e-241	1.563e-239		AO090012000944	4	2437678	2441206	3528	18211.9	-5.8	0.21	4.134e-162	3.042e-160
AO090012000130	4	313242	314739	1497	2624.54	-3.42	0.1	4.073e-240	3.052e-238		AO090011000869	7	2220902	2222027	1125	2283.87	-4.38	0.16	6.108e-162	4.466e-160
AO090005000688	1	4613020	4616376	3356	7654.14	-2.51	0.08	4.602e-240	3.426e-238		AO090005000828	1	4201334	4203068	1734	799.51	7.03	0.26	7.25e-162	5.266e-160
AO090023000591	3	1564577	1565772	1195	1495.26	2.68	0.08	2.029e-239	1.501e-237		AO090026000520	3	3665243	3667193	1950	11316	2.73	0.1	1.668e-159	1.204e-157
AO090003001129	2	5184089	5185286	1197	1721.37	-3.66	0.11	2.69e-239	1.978e-237		AO090011000747	7	1911699	1914721	3022	2978.87	-6.45	0.24	2.386e-159	1.711e-157
AO090009000520	1	1387004	1389377	2373	3977.56	2.36	0.07	5.068e-239	3.702e-237		AO090012000399	4	981047	982423	1376	3565.89	5.75	0.22	2.272e-158	1.619e-156
AO090020000493	6	566387	568008	1621	3440.26	-3.15	0.1	8.512e-239	6.178e-237		AO090009000294	1	783272	784877	1605	2944.03	2.8	0.1	1.233e-157	8.732e-156
AO090010000533	8	1968500	1969486	986	16093.1	5.36	0.16	5.127e-238	3.698e-236		AO090102000388	4	3466271	3468049	1778	1239.87	8.49	0.32	2.374e-157	1.671e-155
AO090011000781	7	1983920	1984976	1056	2667.5	-3.23	0.1	3.09e-237	2.215e-235		AO090166000077	4	4775113	4777699	2586	1316.44	6.91	0.26	3.712e-157	2.596e-155
AO090026000555	3	3563606	3565164	1558	1514.14	-3.84	0.12	4.113e-237	2.931e-235		AO090102000173	4	4087278	4088668	1390	6095.03	4.05	0.15	6.329e-157	4.399e-155
AO090026000139	3	4728241	4729340	1099	1780.93	3.14	0.1	1.502e-236	1.064e-234		AO090001000265	2	659393	662514	3121	4267.25	5.75	0.22	8.904e-157	6.152e-155
AO090020000703	6	42441	44775	2334	7661.42	-3.45	0.11	2.485e-236	1.749e-234		AO090012000051	4	113983	116038	2055	1856.2	2.49	0.09	1.385e-156	9.514e-155
AO090011000062	7	188624	190585	1961	2582.44	-2.75	0.08	4.919e-236	3.442e-234		AO090005000121	1	6116727	6119560	2833	2301.68	-3.31	0.12	3.73e-156	2.546e-154
AO090012000208	4	522399	523438	1039	5611.66	2.69	0.08	9.256e-236	6.437e-234		AO090023000349	3	890287	891557	1270	6755.16	-3.75	0.14	5.442e-156	3.692e-154
AO090005001044	1	3644866	3646019	1153	8005.87	-3.27	0.1	7.789e-235	5.385e-233		AO090138000096	6	3990442	3992611	2169	1866.59	-3.84	0.15	4.505e-155	3.039e-153
AO090102000167	4	4107276	4107683	407	1252.47	3.14	0.1	1.069e-234	7.347e-233		AO090003001250	2	5491379	5492446	1067	2783.32	3.5	0.13	4.825e-155	3.235e-153
AO090010000444	8	2197556	2200018	2462	51658.8	4.26	0.13	1.496e-234	1.022e-232		AO090023000728	3	1915635	1917205	1570	1559.26	3.98	0.15	7e-155	4.666e-153
AO090003000384	2	3118311	3120042	1731	4619.67	-4.61	0.14	5.113e-234	3.473e-232		AO090102000339	4	3604260	3605719	1459	6173.09	8.16	0.31	1.898e-154	1.258e-152
AO090005000583	1	4899389	4899857	468	104352	3.38	0.1	2.172e-233	1.467e-231		AO090103000134	8	913286	914138	852	6107.9	-3.25	0.12	2.564e-154	1.689e-152
AO090001000481	2	1215473	1216277	804	11474.4	2.02	0.06	5.245e-233	3.521e-231		AO090026000559	3	3553096	3554390	1294	2618.62	-8.84	0.34	2.992e-154	1.96e-152
AO090003000751	2	4111870	4113211	1341	1578.73	-3.63	0.11	6.674e-233	4.455e-231		AO090005001117	1	3450657	3451906	1249	24162.1	3.82	0.15	5.476e-153	3.566e-151
AO090005000038	1	6336496	6337842	1346	1857.24	-5.15	0.16	9.33e-233	6.192e-231		AO090001000152	2	341068	342305	1237	706.53	6.6	0.25	6.996e-153	4.53e-151
AO090020000667	6	134651	136446	1795	5955	2.46	0.08	1.313e-231	8.665e-230		AO090011000715	7	1828959	1830646	1687	2157.29	4	0.15	8.704e-153	5.604e-151
AO090012000671	4	1707949	1709107	1158	1566.56	-3.56	0.11	2.497e-231	1.639e-229		AO090023000756	3	1978780	1980611	1831	5413.95	4.44	0.17	1.757e-152	1.125e-150
AO090011000848	7	2170269	2171322	1053	3038.7	-3.12	0.1	1.122e-230	7.318e-229		AO090206000077	7	2788988	2790047	1059	2005.76	3.35	0.13	2.5e-152	1.592e-150
AO090701000193	5	1820331	1821984	1653	9296.08	2.18	0.07	1.162e-230	7.538e-229		AO090005000446	1	5265059	5267163	2104	7743.53	-7.06	0.27	3.618e-152	2.29e-150
AO090010000202	8	2865665	2867343	1678	10245.5	-2.88	0.09	1.849e-230	1.193e-228		AO090003001036	2	4885880	4887257	1377	30217.6	-5.59	0.21	1.134e-151	7.137e-150
AO090102000580	4	2961267	2962204	937	1954.77	2.51	0.08	1.378e-229	8.845e-228		AO090023000641	3	1680885	1683038	2153	3281.3	3	0.11	1.165e-151	7.29e-150
AO090012001027	4	2662918	2665696	2778	14343.2	2.32	0.07	1.787e-229	1.14e-227		AO090023000280	3	724802	726791	1989	1537.67	-5.41	0.21	1.307e-151	8.14e-150
AO090005001147	1	3380017	3381052	1035	18965.1	4.12	0.13	8.497e-228	5.393e-226		AO090701000489	5	1068866	1071845	2979	1285.79	-5.59	0.21	2.334e-151	1.445e-149
AO090206000077	7	2788988	2790047	1059	3492.05	2.79	0.09	2.879e-227	1.817e-225		AO090009000682	1	1831188	1832448	1260	5484.41	4.14	0.16	2.709e-151	1.668e-149
AO090001000239	2	584615	585335	720	833.82	4.66	0.15	2.936e-226	1.843e-224		AO090003001097	2	5076198	5080650	4452	11156.8	4.19	0.16	1.498e-150	9.172e-149
AO090005000871	1	4099237	4099613	376	3882.24	-3.61	0.11	2.204e-225	1.376e-223		AO090009000063	1	179199	180216	1017	3700.58	-3.55	0.14	1.306e-149	7.954e-148
AO090005000977	1	3816856	3818584	1728	4037.11	2.24	0.07	2.419e-225	1.502e-223		AO090038000235	6	3043828	3045226	1398	1706.38	-2.78	0.11	1.499e-149	9.083e-148
AO090005001244	1	3124625	3126639	2014	4872.73	3.19	0.1	9.068e-225	5.602e-223		AO090003000050	2	2219966	2222319	2353	2466.65	-5.7	0.22	1.658e-149	9.992e-148
AO090011000154	7	418656	419745	1089	2756.54	2.77	0.09	1.079e-224	6.633e-223		AO090005000692	1	4599453	4601443	1990	1898.51	-6.97	0.27	2.405e-149	1.442e-147
AO090003000045	2	2211195	2211962	767	1998.24	-5.26	0.17	1.702e-223	1.04e-221		AO090003000144	2	2475741	2477840	2099	2952.01	2.8	0.11	5.139e-149	3.065e-147
AO090124000052	5	2561017	2562357	1340	2774.83	-2.98	0.09	6.297e-223	3.829e-221		AO090005001647	1	2024296	2026083	1787	4808.53	-5.4	0.21	5.188e-149	3.078e-147
AO090011000920	7	2403696	2404810	1114	3306.65	3.32	0.1	1.907e-222	1.154e-220		AO090010000623	8	1759262	1761736	2474	3017.22	3.89	0.15	7.39e-149	4.361e-147
AO090010000470	8	2136403	2138174	1771	1011.01	4	0.13	2.183e-222	1.314e-220		AO090023000348	3	886008	887791	1783	726	-4.51	0.17	1.538e-148	9.027e-147
AO090011000344	7	882133	883099	966	11265.5	2.25	0.07	2.832e-222	1.695e-220		AO090023000488	3	1262485	1264377	1892	973.29	-4.01	0.16	3.042e-148	1.777e-146
AO090010000612	8	1787804	1788572	768	942.39	-4.87	0.15	6.413e-222	3.819e-220		AO090103000105	8	997487	998744	1257	3252.42	-8.89	0.34	6.127e-148	3.56e-146
AO090001000487	2	1230958	1233104	2146	3950.64	2.36	0.07	5.657e-221	3.352e-219		AO090001000383	2	965090	966435	1345	1835.19	4.17	0.16	4.105e-147	2.373e-145
AO090103000085	8	1041149	1043178	2029	1879.49	-5.37	0.17	6.965e-221	4.106e-219		AO090701000235	5	1720426	1722032	1606	4098.71	2.81	0.11	4.919e-147	2.829e-145
AO090003000831	2	4331383	4332925	1542	11079.4	3.09	0.1	1.494e-220	8.761e-219		AO090003001204	2	5368637	5369948	1311	4125.56	-3.84	0.15	5.15e-147	2.947e-145
AO090011000446	7	1126660	1127925	1265	2942.25	-2.96	0.09	8.802e-220	5.137e-218		AO090010000176	8	2947434	2948525	1091	1287.26	-6.71	0.26	1.784e-146	1.016e-144
AO090003001467	2	6013818	6016053	2235	728.23	3.18	0.1	3.6e-219	2.09e-217		AO090009000362	1	968507	970104	1597	1165.45	3.65	0.14	5.021e-146	2.845e-144
AO090011000687	7	1766535	1767654	1119	1296.91	2.52	0.08	7.451e-218	4.305e-216		AO090102000483	4	3217559	3219762	2203	6946.65	-7.69	0.3	1.079e-145	6.082e-144
AO090120000084	5	2879531	2881063	1532	1827.32	-3.87	0.12	7.901e-218	4.543e-216		AO090011000202	7	524616	525867	1251	55469.6	6.46	0.25	1.289e-145	7.233e-144
AO090005000886	1	4056449	4058903	2454	8666.68	2.45	0.08	3.831e-217	2.192e-215		AO090023000696	3	1836335	1837499	1164	9544.51	-2.65	0.1	1.79e-145	9.994e-144
AO090005001250	1	3104427	3107425	2998	2826.88	-2.27	0.07	1.129e-216	6.43e-215		AO090023000856	3	2235942	2237061	1119	7504.85	3.49	0.14	1.478e-144	8.212e-143
AO090026000078	3	4914175	4916240	2065	1881.74	-3.38	0.11	1.63e-216	9.234e-215		AO090020000686	6	84812	86202	1390	392.62	4.39	0.17	2.916e-144	1.612e-142
AO090001000070	2	159559	160372	813	7829.08	1.91	0.06	2.263e-216	1.27e-214		AO090001000539	2	1407714	1408257	543	1521.28	-4.57	0.18	5.194e-143	2.857e-141
AO090701000273	5	1621931	1623768	1837	9241.51	3.58	0.11	2.258e-216	1.27e-214		AO090026000775	3	3017602	3019486	1884	71249.9	-3.89	0.15	7.902e-143	4.325e-141
AO090020000176	6	1381580	1383475	1895	1765.92	-5.25	0.17	4.352e-216	2.43e-214		AO090005000455	1	5241303	5243177	1874	4966.23	5.04	0.2	1.979e-142	1.078e-140
AO090102000026	4	4482255	4483749	1494	1418.63	-2.81	0.09	1.317e-215	7.32e-214		AO090023000383	3	984890	986294	1404	696.83	7.44	0.3	6.576e-141	3.565e-139
AO090023000570	3	1503688	1504524	836	24311.9	2.99	0.1	1.518e-214	8.393e-213		AO090003000212	2	2654470	2655172	702	3818.12	-8.6	0.34	1.035e-140	5.586e-139
AO090023000893	3	2337724	2339115	1391	16969.9	3.07	0.1	1.266e-213	6.968e-212		AO090011000152	7	414921	415990	1069	1534.57	10.17	0.41	9.271e-140	4.979e-138
AO090120000113	5	2962064	2962860	796	2687.2	2.29	0.07	1.85e-210	1.013e-208		AO090010000102	8	3154203	3155214	1011	1264.33	-5.6	0.22	1.214e-139	6.488e-138
AO090010000483	8	2098125	2100651	2526	20012.8	-2.37	0.08	1.179e-209	6.43e-208		AO090009000129	1	345725	346765	1040	13746.6	-9.91	0.4	2.353e-139	1.252e-137
AO090026000373	3	4050331	4053920	3589	28564.9	1.89	0.06	1.223e-209	6.637e-208		AO090003000984	2	4768669	4769657	988	18430.6	7.23	0.29	2.76e-138	1.461e-136
AO090038000537	6	2218419	2220353	1934	22521.2	-2.82	0.09	4.264e-209	2.303e-207		AO090023000837	3	2184550	2187077	2527	143952	3	0.12	6.139e-138	3.235e-136
AO090005000278	1	5695119	5695860	741	5169.63	2.2	0.07	7.863e-209	4.228e-207		AO090003000135	2	2457262	2460057	2795	6837.96	-2.42	0.1	3.183e-137	1.669e-135
AO090010000401	8	2303412	2304284	872	424.83	6.01	0.2	1.781e-208	9.533e-207		AO090003000180	2	2579955	2581524	1569	4445.08	4.76	0.19	3.51e-137	1.833e-135
AO090701000131	5	1993766	1995110	1344	1831.66	2.72	0.09	5.643e-208	3.006e-206		AO090003000023	2	2150778	2154484	3706	8190.73	-3.59	0.14	3.604e-137	1.873e-135
AO090701000307	5	1536836	1539010	2174	2216.82	-4.09	0.13	6.203e-208	3.29e-206		AO090026000084	3	4894384	4895224	840	466.69	4.83	0.2	6.111e-137	3.162e-135
AO090009000179	1	480964	481582	618	1369.06	3.34	0.11	7.229e-208	3.816e-206		AO090120000286	5	3418133	3418807	674	2230.7	-3.06	0.12	4.161e-136	2.143e-134
AO090038000582	6	2080719	2082679	1960	8533.55	2.39	0.08	1.238e-207	6.504e-206		AO090103000132	8	915979	917547	1568	1328.31	-4.12	0.17	1.067e-135	5.471e-134
AO090003000205	2	2641669	2643260	1591	20600.9	2.7	0.09	1.285e-207	6.722e-206		AO090010000463	8	2156268	2157582	1314	44008	4.07	0.17	3.752e-135	1.915e-133
AO090005001300	1	2935544	2937309	1765	103111	2.34	0.08	2.708e-207	1.411e-205		AO090026000299	3	4268080	4269578	1498	329.89	4.7	0.19	6.84e-135	3.475e-133
AO090020000107	6	1534282	1536625	2343	9392.32	2.33	0.08	5.377e-207	2.788e-205		AO090102000298	4	3723048	3724410	1362	4266.44	-4.09	0.17	7.104e-135	3.594e-133
AO090003000980	2	4757841	4759676	1835	29034.7	3.35	0.11	6.345e-207	3.275e-205		AO090124000079	5	2488107	2489440	1333	18451.8	2.79	0.11	2.006e-134	1.01e-132
AO090026000357	3	4102357	4102828	471	1444.72	3.63	0.12	1.181e-206	6.068e-205		AO090026000180	3	4611323	4614763	3440	4992.16	-3.85	0.16	4.237e-134	2.124e-132
AO090113000110	5	4312089	4313094	1005	6224.55	1.84	0.06	3.355e-206	1.717e-204		AO090020000650	6	172502	174343	1841	490.07	3.91	0.16	5.957e-134	2.974e-132
AO090701000602	5	768214	769613	1399	6125.88	-2.3	0.08	1.397e-205	7.115e-204		AO090120000195	5	3175547	3177031	1484	2157.34	-3.46	0.14	2.558e-133	1.271e-131
AO090701000710	5	492877	497994	5117	17330.9	1.71	0.06	1.522e-205	7.719e-204		AO090005001234	1	3148476	3150225	1749	1577.43	3.19	0.13	3.399e-133	1.682e-131
AO090010000541	8	1950287	1951081	794	6577.82	4.12	0.14	2.705e-205	1.366e-203		AO090003000477	2	3377601	3380260	2659	4926.74	3.48	0.14	3.657e-133	1.802e-131
AO090023000241	3	612381	613147	766	6857.83	1.98	0.07	3.922e-205	1.972e-203		AO090005000988	1	3784079	3785499	1420	9289.29	-11.42	0.47	4.597e-133	2.255e-131
AO090026000714	3	3168019	3169352	1333	2441.22	-2.99	0.1	4.71e-205	2.358e-203		AO090103000477	8	79502	80063	561	3199.15	4.46	0.18	7.116e-133	3.475e-131
AO090009000590	1	1564107	1566746	2639	14585.1	1.99	0.07	1.494e-204	7.445e-203		AO090011000456	7	1152604	1153381	777	1022.8	2.8	0.11	1.367e-132	6.648e-131
AO090011000488	7	1217566	1219324	1758	4288.64	2.17	0.07	2.598e-204	1.29e-202		AO090120000370	5	3660114	3661319	1205	3404.79	-4.37	0.18	1.455e-132	7.045e-131
AO090012000719	4	1831479	1836489	5010	2580.67	-2.61	0.09	1.479e-203	7.31e-202		AO090011000845	7	2162100	2163639	1539	3401.19	2.91	0.12	1.855e-132	8.946e-131
AO090020000699	6	50951	51983	1032	1116.82	-5.2	0.17	1.719e-203	8.459e-202		AO090038000569	6	2112185	2113034	849	48715.1	-6.73	0.28	2.192e-132	1.053e-130
AO090003000602	2	3703950	3704907	957	1383.79	2.7	0.09	2.063e-203	1.011e-201		AO090010000363	8	2387961	2388837	876	471.34	4.37	0.18	3.239e-132	1.549e-130
AO090011000679	7	1744590	1746152	1562	41725.5	3.54	0.12	3.931e-203	1.918e-201		AO090003001024	2	4861466	4862804	1338	1262.18	2.44	0.1	5.853e-132	2.787e-130
AO090011000456	7	1152604	1153381	777	2726.06	2.47	0.08	9.248e-203	4.494e-201		AO090011000638	7	1645255	1647468	2213	19439	3.15	0.13	1.641e-131	7.782e-130
AO090023000883	3	2312558	2313466	908	27769.4	2.5	0.08	1.686e-202	8.16e-201		AO090003001008	2	4825722	4827341	1619	6183.14	-4.31	0.18	2.013e-131	9.504e-130
AO090026000661	3	3292675	3295581	2906	3255.21	2.75	0.09	5.496e-202	2.648e-200		AO090003001504	2	6119409	6120144	735	526.17	-4.12	0.17	3.133e-131	1.473e-129
AO090005000125	1	6109651	6110934	1283	934.12	-3.95	0.13	6.58e-202	3.158e-200		AO090003000629	2	3785232	3789195	3963	4919.81	2.98	0.12	4.91e-131	2.299e-129
AO090003001320	2	5670011	5670476	465	1687.71	3.57	0.12	7.783e-202	3.72e-200		AO090103000287	8	532763	533750	987	870.46	-4.77	0.2	6.46e-130	3.012e-128
AO090113000104	5	4301468	4302647	1179	4540.63	2.46	0.08	1.671e-201	7.951e-200		AO090003000854	2	4412355	4414723	2368	4145.33	6.33	0.26	1.844e-129	8.564e-128
AO090023000319	3	812227	813046	819	2343.81	2.48	0.08	3.47e-201	1.645e-199		AO090023000680	3	1781648	1783329	1681	325.01	4.59	0.19	1.874e-129	8.665e-128
AO090011000876	7	2245721	2247905	2184	18205.1	2.96	0.1	8.134e-201	3.84e-199		AO090120000112	5	2959173	2959864	691	20651.1	4.6	0.19	3.306e-129	1.523e-127
AO090012000988	4	2560207	2566780	6573	51839.6	-2.29	0.08	7.377e-200	3.468e-198		AO090138000132	6	3893214	3893739	525	8297.02	-3.35	0.14	4.415e-129	2.025e-127
AO090003001092	2	5063650	5065118	1468	2452.85	3.26	0.11	3.719e-199	1.742e-197		AO090026000639	3	3355620	3356740	1120	6841.29	-4.6	0.19	5.224e-129	2.387e-127
AO090003000666	2	3885346	3887151	1805	3554.37	2.29	0.08	1.118e-198	5.215e-197		AO090012000996	4	2582273	2583570	1297	4840.11	3.06	0.13	1.647e-128	7.495e-127
AO090020000489	6	576757	577342	585	3134.16	2.42	0.08	1.408e-198	6.54e-197		AO090011000524	7	1321444	1322609	1165	766.29	-6.45	0.27	7.511e-128	3.404e-126
AO090701000830	5	191746	193429	1683	2692.96	2.17	0.07	3.459e-198	1.601e-196		AO090005000709	1	4557293	4558503	1210	1115.32	-4.95	0.21	8.576e-128	3.872e-126
AO090701000600	5	774848	776289	1441	3514.39	-4.94	0.17	2.353e-197	1.084e-195		AO090120000287	5	3418874	3421231	2357	23985.6	-3.05	0.13	1.463e-127	6.58e-126
AO090701000235	5	1720426	1722032	1606	6433.39	2.18	0.07	2.534e-197	1.163e-195		AO090020000347	6	966907	967893	986	3105.09	4.57	0.19	7.094e-127	3.177e-125
AO090005001530	1	2348484	2350195	1711	16274.2	2.79	0.09	4.331e-197	1.981e-195		AO090005001561	1	2247458	2248740	1282	6402.2	3.12	0.13	7.711e-127	3.44e-125
AO090009000369	1	991255	993591	2336	3164.83	-2.62	0.09	9.985e-197	4.548e-195		AO090020000489	6	576757	577342	585	2078.29	2.67	0.11	1.227e-126	5.454e-125
AO090020000083	6	1596038	1596893	855	2153.16	2.4	0.08	1.612e-196	7.312e-195		AO090003000761	2	4139638	4140743	1105	364.53	3.9	0.16	1.82e-126	8.057e-125
AO090011000654	7	1698088	1699624	1536	2807.83	-3.59	0.12	1.976e-196	8.931e-195		AO090701000684	5	570196	573010	2814	1509.92	2.67	0.11	2.192e-126	9.665e-125
AO090009000294	1	783272	784877	1605	4614.99	2.68	0.09	2.588e-196	1.163e-194		AO090026000842	3	2812159	2813899	1740	12168.6	2.31	0.1	3.401e-126	1.494e-124
AO090009000593	1	1578255	1579697	1442	1430.68	-4.42	0.15	2.593e-196	1.163e-194		AO090005000246	1	5780085	5781956	1871	2819.46	-5.86	0.25	3.608e-126	1.578e-124
AO090012000777	4	1999604	2002845	3241	1800.63	2.09	0.07	2.424e-195	1.083e-193		AO090701000600	5	774848	776289	1441	714.54	-4.37	0.18	9.489e-126	4.135e-124
AO090701000399	5	1290521	1291505	984	1087.29	-3.33	0.11	9.407e-195	4.186e-193		AO090020000259	6	1171204	1174095	2891	756.55	-3.44	0.14	1.275e-125	5.534e-124
AO090003000779	2	4191134	4191565	431	1028.56	3.42	0.12	9.573e-195	4.243e-193		AO090012000948	4	2466555	2467966	1411	21716.3	3.17	0.13	2.133e-125	9.223e-124
AO090010000462	8	2157886	2159242	1356	2275.95	2.64	0.09	1.281e-194	5.657e-193		AO090003000855	2	4417550	4420419	2869	1863.01	2.29	0.1	3.142e-125	1.354e-123
AO090011000773	7	1967262	1969086	1824	7142.82	2.64	0.09	2.26e-194	9.944e-193		AO090038000463	6	2436489	2436964	475	408.9	6.98	0.3	8.922e-125	3.829e-123
AO090001000590	2	1547450	1548328	878	1606.49	-3.77	0.13	5.007e-194	2.194e-192		AO090001000200	2	461689	463782	2093	1186.9	-4.97	0.21	1.121e-124	4.792e-123
AO090011000342	7	874862	878504	3642	1750.52	2.62	0.09	2.968e-193	1.296e-191		AO090103000146	8	889375	891134	1759	1377.11	-3.84	0.16	1.492e-124	6.354e-123
AO090026000787	3	2994712	2995786	1074	1371	3.24	0.11	5.723e-193	2.49e-191		AO090009000302	1	801886	803423	1537	382.99	3.3	0.14	1.79e-124	7.596e-123
AO090005001544	1	2307352	2307867	515	2894.12	2.77	0.09	1.937e-192	8.396e-191		AO090010000350	8	2421028	2425025	3997	1134.16	6.76	0.29	2.472e-124	1.045e-122
AO090020000024	6	1766484	1768110	1626	6038.49	2.31	0.08	2.38e-192	1.027e-190		AO090103000449	8	134498	135162	664	3070.34	-6.73	0.29	4.696e-124	1.978e-122
AO090012000975	4	2528704	2529076	372	1675.39	2.79	0.09	2.454e-192	1.056e-190		AO090038000460	6	2441173	2444006	2833	692.43	-5.13	0.22	1.372e-123	5.76e-122
AO090701000538	5	930833	931710	877	2998.63	-3.2	0.11	2.63e-192	1.127e-190		AO090009000049	1	130570	132170	1600	5119.99	-6.29	0.27	1.756e-123	7.342e-122
AO090120000045	5	2788382	2790118	1736	1571.91	-2.76	0.09	6.778e-192	2.894e-190		AO090009000589	1	1561731	1563083	1352	1527.21	5.09	0.22	3.654e-123	1.522e-121
AO090001000592	2	1550814	1551603	789	8906.35	2.34	0.08	7.197e-192	3.062e-190		AO090003000256	2	2774469	2775053	584	2124.79	-3.17	0.14	7.646e-123	3.162e-121
AO090020000412	6	797713	799197	1484	6030.66	2.45	0.08	1.239e-191	5.253e-190		AO090010000101	8	3156643	3158679	2036	1002.55	-7.1	0.3	7.619e-123	3.162e-121
AO090020000259	6	1171204	1174095	2891	815.97	2.95	0.1	1.829e-191	7.723e-190		AO090020000301	6	1072143	1074393	2250	1197.4	-3.57	0.15	9.297e-123	3.831e-121
AO090120000341	5	3598112	3599489	1377	4991.25	-2.05	0.07	2.901e-190	1.221e-188		AO090701000388	5	1321172	1321916	744	1203.39	-5.65	0.24	1.049e-122	4.307e-121
AO090701000508	5	1014034	1016602	2568	2156.43	-2.96	0.1	4.628e-190	1.94e-188		AO090020000492	6	568385	570234	1849	9778.3	-3.64	0.16	1.059e-122	4.33e-121
AO090001000164	2	372876	373462	586	51071.3	4.38	0.15	1.155e-189	4.826e-188		AO090003001277	2	5554991	5556793	1802	1840.08	-3.22	0.14	1.317e-122	5.367e-121
AO090005000357	1	5523794	5524556	762	671.23	3.62	0.12	1.341e-189	5.584e-188		AO090020000170	6	1390910	1392663	1753	3249.29	-3.33	0.14	2.657e-122	1.079e-120
AO090003000043	2	2203902	2206473	2571	17905.3	4.7	0.16	2.344e-189	9.721e-188		AO090023000095	3	240360	241809	1449	1759.5	-3.91	0.17	4.866e-122	1.969e-120
AO090701000401	5	1283489	1286492	3003	11445.7	2.58	0.09	6.032e-189	2.493e-187		AO090010000679	8	1627893	1628574	681	1478.42	-5.34	0.23	9.626e-122	3.882e-120
AO090003000247	2	2747302	2750084	2782	2793.71	2.48	0.08	8.346e-189	3.437e-187		AO090023000158	3	400392	401206	814	392.48	5.75	0.25	1.524e-121	6.122e-120
AO090005001453	1	2587041	2588300	1259	947.57	-4.24	0.15	1.551e-188	6.365e-187		AO090010000032	8	3322996	3323953	957	518.34	4.89	0.21	1.799e-121	7.204e-120
AO090003001184	2	5316696	5318040	1344	1264.46	2.96	0.1	2.31e-188	9.448e-187		AO090001000196	2	451430	453493	2063	1700.09	2.98	0.13	2.208e-121	8.808e-120
AO090701000311	5	1528704	1530734	2030	3538.74	-3.81	0.13	3.011e-187	1.227e-185		AO090012000166	4	394767	395256	489	1711.31	-8.06	0.35	3.324e-121	1.321e-119
AO090003000768	2	4159080	4160417	1337	373.21	5.23	0.18	7.984e-187	3.242e-185		AO090003001501	2	6113124	6114564	1440	2138.25	-3.13	0.13	6.425e-121	2.545e-119
AO090012000928	4	2393913	2395406	1493	4194.49	2.08	0.07	1.907e-186	7.718e-185		AO090011000292	7	743779	745278	1499	5019.5	4.02	0.17	8.31e-121	3.281e-119
AO090003000083	2	2311943	2314719	2776	1350.72	-2.67	0.09	2.636e-186	1.063e-184		AO090005001074	1	3577456	3578625	1169	386.67	7.07	0.3	1.13e-120	4.446e-119
AO090001000511	2	1315857	1317574	1717	1786.16	-2.66	0.09	3.523e-186	1.416e-184		AO090001000449	2	1138210	1140589	2379	6446.4	-3.57	0.15	3.154e-120	1.237e-118
AO090026000833	3	2845886	2848843	2957	3406.84	2.42	0.08	4.089e-186	1.637e-184		AO090026000056	3	4976921	4978419	1498	432.85	3.98	0.17	3.685e-120	1.44e-118
AO090011000521	7	1313671	1315209	1538	1810.07	-3.04	0.1	4.797e-186	1.914e-184		AO090102000052	4	4411927	4412752	825	1779.5	7.93	0.34	4.368e-120	1.701e-118
AO090113000132	5	4362181	4362684	503	2834.21	-4.56	0.16	4.85e-186	1.929e-184		AO090026000826	3	2874119	2876420	2301	12043.1	-6.72	0.29	4.597e-120	1.784e-118
AO090003000741	2	4079169	4081460	2291	2748.48	-2.59	0.09	5.542e-186	2.197e-184		AO090005000445	1	5268297	5269477	1180	803.64	2.83	0.12	7.912e-120	3.06e-118
AO090003000624	2	3766104	3769024	2920	1092.56	3.56	0.12	6.525e-186	2.578e-184		AO090120000008	5	2712149	2713808	1659	3220.29	-5.56	0.24	1.206e-119	4.648e-118
AO090009000015	1	53558	54571	1013	751.36	3.18	0.11	6.85e-186	2.697e-184		AO090038000416	6	2554186	2555322	1136	734.65	-3.72	0.16	1.762e-119	6.767e-118
AO090003000564	2	3599432	3602504	3072	2567.97	-2.62	0.09	7.97e-186	3.127e-184		AO090102000135	4	4197682	4199403	1721	341.21	5.88	0.26	2.359e-119	9.031e-118
AO090011000425	7	1082410	1083379	969	3285.31	-2.51	0.09	8.775e-186	3.431e-184		AO090012000634	4	1619701	1621366	1665	426	6.85	0.3	3.69e-119	1.408e-117
AO090102000148	4	4155124	4156375	1251	2012.19	2.35	0.08	9.217e-186	3.592e-184		AO090038000223	6	3075942	3078446	2504	846.26	-6.48	0.28	4.05e-119	1.54e-117
AO090103000420	8	201884	205870	3986	1223.87	-4.57	0.16	1.635e-185	6.351e-184		AO090003001385	2	5833914	5838690	4776	939.67	9.28	0.4	5.277e-119	2e-117
AO090038000626	6	1959606	1962995	3389	7615.55	-2.62	0.09	3.4e-185	1.316e-183		AO090038000455	6	2455975	2458797	2822	2388.32	2.06	0.09	5.838e-119	2.205e-117
AO090020000492	6	568385	570234	1849	4450.85	-2.97	0.1	4.271e-185	1.648e-183		AO090020000339	6	982810	984539	1729	2260.17	4.53	0.2	6.207e-119	2.337e-117
AO090023001009	3	2654074	2654654	580	26521.6	2.16	0.07	7.068e-185	2.718e-183		AO090010000743	8	1461454	1463596	2142	258474	-2.83	0.12	7.639e-119	2.866e-117
AO090010000443	8	2200318	2200818	500	22460.7	2.86	0.1	7.094e-185	2.719e-183		AO090026000264	3	4361047	4361962	915	1628.62	2.25	0.1	1.216e-118	4.547e-117
AO090011000132	7	366419	367441	1022	1514.94	3.66	0.13	2.251e-184	8.601e-183		AO090012000502	4	1268401	1273189	4788	10247.3	3.24	0.14	1.505e-118	5.609e-117
AO090010000090	8	3179628	3180076	448	1037.14	-3.74	0.13	1.726e-183	6.573e-182		AO090003000912	2	4564308	4565780	1472	1174.92	3.79	0.16	4.025e-118	1.495e-116
AO090026000832	3	2848904	2851961	3057	5514.31	2.81	0.1	6.162e-183	2.339e-181		AO090023000123	3	311996	313254	1258	9194.91	5.3	0.23	3.279e-117	1.214e-115
AO090012000313	4	771967	772884	917	1527.69	-3.98	0.14	9.099e-183	3.442e-181		AO090011000415	7	1057793	1059707	1914	1656.23	8.3	0.36	3.531e-117	1.303e-115
AO090012000304	4	756961	759910	2949	1432.52	3.08	0.11	6.344e-182	2.392e-180		AO090701000246	5	1693893	1694926	1033	1510.61	-4.98	0.22	4.032e-117	1.483e-115
AO090011000598	7	1517315	1520107	2792	13943.1	2.09	0.07	4.439e-181	1.668e-179		AO090005001442	1	2614719	2615968	1249	2632.65	3.79	0.17	5.638e-117	2.067e-115
AO090009000634	1	1692244	1693446	1202	332996	3.41	0.12	4.73e-181	1.772e-179		AO090010000532	8	1971779	1972487	708	949.06	-4.7	0.21	7.552e-117	2.76e-115
AO090701000539	5	926964	928726	1762	2228.21	-3.88	0.14	5.474e-181	2.044e-179		AO090003000268	2	2808423	2810097	1674	517.21	6.7	0.29	7.885e-117	2.873e-115
AO090011000370	7	949388	950269	881	1716.38	-3.74	0.13	6.409e-181	2.386e-179		AO090102000476	4	3238855	3241116	2261	6006.05	3.3	0.14	3.371e-116	1.224e-114
AO090038000281	6	2925321	2927010	1689	50014.9	4.04	0.14	7.393e-181	2.743e-179		AO090003000705	2	3995822	3996360	538	2286.52	-3.55	0.16	4.452e-116	1.612e-114
AO090120000145	5	3039209	3040211	1002	4485.03	2.58	0.09	2.206e-180	8.16e-179		AO090011000818	7	2078778	2079732	954	5421.74	-6.56	0.29	1.112e-115	4.011e-114
AO090010000708	8	1552451	1553339	888	410.15	4.59	0.16	3.553e-180	1.31e-178		AO090020000180	6	1375475	1376703	1228	2825.41	2.04	0.09	1.354e-115	4.869e-114
AO090001000177	2	399567	400542	975	3318.34	2.46	0.09	1.116e-179	4.1e-178		AO090005001450	1	2598609	2599598	989	5759.57	2.56	0.11	2.029e-115	7.277e-114
AO090701000172	5	1882361	1884417	2056	5602.25	2.11	0.07	1.297e-179	4.75e-178		AO090103000082	8	1047816	1049618	1802	1417.66	2.69	0.12	2.415e-115	8.633e-114
AO090001000186	2	425774	426272	498	11626.2	-2.07	0.07	1.574e-179	5.749e-178		AO090020000053	6	1675665	1676790	1125	1206.4	2.81	0.12	3.671e-115	1.308e-113
AO090010000166	8	2972480	2973319	839	1003.15	2.47	0.09	6.155e-179	2.241e-177		AO090003000241	2	2733174	2734189	1015	8950.58	3.41	0.15	4.125e-115	1.465e-113
AO090003001537	2	6210284	6211700	1416	1067.47	-3.17	0.11	2.541e-178	9.222e-177		AO090020000699	6	50951	51983	1032	1424.1	-4.55	0.2	4.786e-115	1.695e-113
AO090005001160	1	3338621	3339450	829	830.67	-4.93	0.17	2.752e-178	9.957e-177		AO090003000205	2	2641669	2643260	1591	14205	6.83	0.3	5.601e-115	1.977e-113
AO090023000141	3	357872	359126	1254	16405.5	2.55	0.09	3.113e-178	1.123e-176		AO090701000100	5	2091887	2094141	2254	2648.63	3.41	0.15	6.691e-115	2.355e-113
AO090010000361	8	2389491	2390748	1257	5173.46	4.02	0.14	1.127e-177	4.053e-176		AO090005000456	1	5236847	5238286	1439	14835.5	3.87	0.17	1.36e-114	4.77e-113
AO090003001549	2	6234561	6236592	2031	30023.7	-3.69	0.13	2.562e-177	9.183e-176		AO090026000443	3	3873934	3874939	1005	1289.38	-2.53	0.11	1.387e-114	4.849e-113
AO090003000483	2	3389474	3391148	1674	3363.28	1.87	0.07	3.798e-177	1.357e-175		AO090001000559	2	1464145	1465163	1018	1507.84	3.32	0.15	2.202e-114	7.678e-113
AO090701000269	5	1637275	1638774	1499	5333.92	2.1	0.07	5.067e-177	1.805e-175		AO090020000138	6	1467531	1468209	678	552.2	-3.61	0.16	2.444e-114	8.494e-113
AO090010000613	8	1786599	1787678	1079	1110.96	-3.6	0.13	5.9e-177	2.095e-175		AO090701000470	5	1115066	1116218	1152	3367.95	-5.02	0.22	3.809e-114	1.32e-112
AO090038000282	6	2922705	2924372	1667	1905.8	2.2	0.08	2.553e-176	9.038e-175		AO090003000713	2	4010757	4011846	1089	727.52	-4.57	0.2	6.8e-114	2.349e-112
AO090124000053	5	2557968	2560575	2607	3158.91	-2.31	0.08	2.848e-176	1.005e-174		AO090010000021	8	3348400	3349933	1533	827.36	-4.92	0.22	1.414e-113	4.871e-112
AO090003000024	2	2155178	2157191	2013	4229.82	2.45	0.09	4.371e-176	1.538e-174		AO090012000217	4	540303	541488	1185	4588.92	-3.6	0.16	3.044e-113	1.045e-111
AO090701000598	5	779413	780730	1317	7162.77	-3.14	0.11	9.642e-176	3.383e-174		AO090005001321	1	2882542	2883343	801	741.08	-3.58	0.16	3.333e-113	1.141e-111
AO090011000875	7	2239352	2241603	2251	7697.35	1.67	0.06	1.325e-175	4.636e-174		AO090011000043	7	121831	142723	20892	4314.8	-2.55	0.11	4.111e-113	1.403e-111
AO090003000206	2	2645270	2646710	1440	4071.72	3.3	0.12	3.495e-175	1.219e-173		AO090005000166	1	5986432	5988381	1949	9119.71	6.07	0.27	4.201e-113	1.429e-111
AO090005001429	1	2636013	2637455	1442	12882.5	3	0.11	5.97e-175	2.076e-173		AO090023000469	3	1204630	1205452	822	2371.44	3.12	0.14	4.958e-113	1.682e-111
AO090005001060	1	3616873	3617726	853	2929.81	2.58	0.09	6.25e-175	2.167e-173		AO090005001231	1	3161692	3166027	4335	1114.3	3.51	0.16	8.403e-113	2.842e-111
AO090138000035	6	4123806	4125730	1924	898.63	-4.48	0.16	1.075e-174	3.717e-173		AO090701000172	5	1882361	1884417	2056	4435.55	3.24	0.14	2.21e-112	7.453e-111
AO090701000071	5	2161974	2162373	399	1150.32	-3.51	0.12	1.194e-174	4.114e-173		AO090001000358	2	895955	897850	1895	6599.92	5.27	0.24	5.692e-112	1.914e-110
AO090102000166	4	4108474	4115764	7290	5497.86	3.67	0.13	1.304e-174	4.479e-173		AO090005001065	1	3597465	3597865	400	6603.29	-3.07	0.14	7.47e-112	2.504e-110
AO090103000347	8	379723	385023	5300	7640.04	-1.86	0.07	2.111e-174	7.233e-173		AO090003001046	2	4904964	4906425	1461	5317.78	3.82	0.17	2.006e-111	6.703e-110
AO090020000216	6	1282636	1284253	1617	806.45	-5	0.18	7.021e-174	2.398e-172		AO090003000925	2	4607544	4607983	439	1547.53	2.63	0.12	8.711e-111	2.903e-109
AO090023000658	3	1734070	1734868	798	968.87	-3.72	0.13	3.248e-173	1.106e-171		AO090003000070	2	2280288	2281412	1124	4054.36	2.42	0.11	1.009e-110	3.353e-109
AO090011000838	7	2132591	2139573	6982	43742.7	3.11	0.11	4.038e-173	1.371e-171		AO090011000664	7	1715342	1716146	804	1837.69	-3.53	0.16	1.04e-110	3.447e-109
AO090003000413	2	3182416	3185385	2969	2256.31	2.24	0.08	4.781e-173	1.619e-171		AO090009000579	1	1539125	1540865	1740	338.85	4.74	0.21	1.068e-110	3.527e-109
AO090120000364	5	3651335	3652679	1344	2466.84	2.09	0.07	5.02e-173	1.695e-171		AO090026000555	3	3563606	3565164	1558	1288.39	-2.94	0.13	3.414e-110	1.125e-108
AO090120000183	5	3146073	3146666	593	29084.2	2.88	0.1	6.735e-173	2.267e-171		AO090020000618	6	246783	248297	1514	3183.82	3.74	0.17	4.663e-110	1.531e-108
AO090003000252	2	2762920	2763793	873	1964.24	2.83	0.1	1.021e-172	3.427e-171		AO090026000640	3	3354454	3355311	857	1252.12	-3.97	0.18	6.579e-110	2.155e-108
AO090701000175	5	1872620	1874524	1904	14191.1	-2.05	0.07	1.256e-172	4.204e-171		AO090166000060	4	4717569	4720497	2928	4293.19	-3.21	0.14	1.029e-109	3.361e-108
AO090005000165	1	5992190	5995613	3423	2972.63	2.59	0.09	1.486e-172	4.96e-171		AO090012000418	4	1031888	1034730	2842	1357.31	3.45	0.16	2.133e-109	6.946e-108
AO090701000129	5	1998363	1999655	1292	4250.17	2.23	0.08	1.88e-172	6.257e-171		AO090701000838	5	167107	168038	931	1269.05	-5.3	0.24	4.845e-109	1.573e-107
AO090009000055	1	159675	164008	4333	3949.47	2.42	0.09	9.231e-172	3.063e-170		AO090102000606	4	2885717	2886542	825	3002.1	2.23	0.1	1.409e-108	4.56e-107
AO090120000499	5	4018184	4018792	608	2193.42	3.13	0.11	2.076e-171	6.87e-170		AO090011000300	7	758270	759664	1394	8090.85	-6.19	0.28	1.478e-108	4.771e-107
AO090103000023	8	1207792	1209189	1397	1180.57	2.72	0.1	2.549e-171	8.411e-170		AO090011000558	7	1410715	1412803	2088	639.19	-3.93	0.18	1.962e-108	6.317e-107
AO090010000755	8	1432293	1434152	1859	2240.83	3.73	0.13	2.565e-171	8.438e-170		AO090020000332	6	995524	996761	1237	9703.11	-2.62	0.12	4.412e-108	1.416e-106
AO090011000641	7	1652983	1653736	753	1257.6	-2.55	0.09	2.793e-171	9.164e-170		AO090012000154	4	368755	369912	1157	7229.54	-2.66	0.12	2.158e-107	6.907e-106
AO090102000298	4	3723048	3724410	1362	1051.28	-3.29	0.12	1.111e-170	3.635e-169		AO090005000886	1	4056449	4058903	2454	8550.97	4.12	0.19	3.927e-107	1.254e-105
AO090124000043	5	2578738	2579383	645	1081.37	-4.17	0.15	2.341e-170	7.638e-169		AO090026000219	3	4500526	4502171	1645	825.93	-2.81	0.13	4.783e-107	1.522e-105
AO090003000469	2	3358335	3360149	1814	2552.21	-1.97	0.07	2.376e-170	7.731e-169		AO090005001102	1	3501869	3503197	1328	4138.1	-3.94	0.18	8.207e-107	2.605e-105
AO090005000037	1	6338516	6340263	1747	754.77	-4.69	0.17	2.42e-170	7.851e-169		AO090005000630	1	4770131	4772059	1928	3135.92	2.77	0.13	9.245e-107	2.926e-105
AO090003001096	2	5074315	5075566	1251	17842.7	3.56	0.13	3.292e-170	1.065e-168		AO090005000436	1	5292831	5294348	1517	15995.2	2.53	0.12	9.57e-107	3.02e-105
AO090020000602	6	298708	299958	1250	3788.89	2.25	0.08	7.397e-170	2.386e-168		AO090011000540	7	1355293	1358565	3272	18732.2	-3.7	0.17	1.41e-106	4.439e-105
AO090003000465	2	3336935	3338526	1591	645.37	3.9	0.14	8.781e-170	2.825e-168		AO090009000022	1	68906	70742	1836	1676.76	-3.56	0.16	1.441e-106	4.524e-105
AO090009000496	1	1316981	1319950	2969	7175.45	3.24	0.12	1.245e-169	3.994e-168		AO090113000103	5	4295947	4300853	4906	4286.39	-5.2	0.24	1.515e-106	4.741e-105
AO090038000241	6	3026581	3028129	1548	1834.03	-2.53	0.09	1.982e-169	6.341e-168		AO090005001451	1	2597201	2598071	870	1633.01	2.51	0.11	1.858e-106	5.799e-105
AO090701000537	5	931980	933652	1672	7978.78	-2.63	0.1	2.327e-169	7.425e-168		AO090003001357	2	5774503	5775202	699	408.36	4.01	0.18	2.17e-106	6.756e-105
AO090003000847	2	4398827	4399529	702	1390.3	-2.23	0.08	1.526e-168	4.856e-167		AO090005000411	1	5371850	5373110	1260	1569.79	2.87	0.13	2.519e-106	7.819e-105
AO090003001249	2	5490149	5491040	891	1527.29	2.35	0.09	1.966e-168	6.238e-167		AO090010000592	8	1833927	1835288	1361	626.47	-3.85	0.18	2.767e-106	8.566e-105
AO090026000736	3	3102678	3103948	1270	785.59	-5.12	0.19	2.392e-168	7.569e-167		AO090012000354	4	872957	876667	3710	887.37	-3.01	0.14	3.022e-106	9.33e-105
AO090005001458	1	2566900	2570347	3447	1742.47	-3.7	0.13	4.511e-168	1.424e-166		AO090011000620	7	1590170	1592000	1830	3007.59	-3.87	0.18	3.718e-106	1.145e-104
AO090026000133	3	4744673	4746840	2167	2766.48	2.33	0.08	8.919e-168	2.807e-166		AO090103000421	8	197963	200845	2882	1546.3	10.77	0.5	5.323e-106	1.635e-104
AO090011000766	7	1954072	1957071	2999	1146.37	2.43	0.09	9.074e-168	2.848e-166		AO090003000044	2	2207340	2209411	2071	1571.05	-4.69	0.22	6.75e-106	2.067e-104
AO090701000671	5	608171	609837	1666	4734.1	2.53	0.09	1.59e-167	4.977e-166		AO090005000706	1	4560902	4562450	1548	1077.3	2.99	0.14	1.093e-105	3.339e-104
AO090023000900	3	2355749	2356361	612	2479.08	-2.11	0.08	1.865e-167	5.822e-166		AO090003001081	2	5027834	5029539	1705	4412.8	-3.67	0.17	1.685e-105	5.133e-104
AO090023000321	3	816309	817602	1293	1530.94	2.4	0.09	2.106e-167	6.556e-166		AO090020000289	6	1101041	1103538	2497	9591.28	-11.57	0.54	2.694e-105	8.183e-104
AO090124000083	5	2476608	2482302	5694	39380.3	2.21	0.08	3.456e-167	1.073e-165		AO090005000781	1	4337994	4339184	1190	1368.26	2.33	0.11	3.857e-105	1.168e-103
AO090011000264	7	673411	677397	3986	816.28	-3.69	0.13	5.206e-167	1.612e-165		AO090012000193	4	477324	478413	1089	6852.68	-4.64	0.21	4.06e-105	1.227e-103
AO090012000551	4	1401812	1403037	1225	16012.4	3.54	0.13	2.932e-166	9.056e-165		AO090010000742	8	1469325	1473191	3866	693.95	-5.31	0.25	5.73e-105	1.727e-103
AO090003001336	2	5713265	5714693	1428	31068.3	-4.08	0.15	4.784e-166	1.474e-164		AO090005000897	1	4028170	4028816	646	1984.89	-2.7	0.12	5.758e-105	1.731e-103
AO090701000343	5	1430679	1431623	944	6924.12	3.43	0.13	5.04e-166	1.548e-164		AO090003000706	2	3996810	4000132	3322	2742.79	-4.91	0.23	6.07e-105	1.819e-103
AO090012000234	4	577384	578006	622	2882.11	-2.55	0.09	5.94e-166	1.82e-164		AO090001000615	2	1611644	1613466	1822	815.27	2.61	0.12	6.261e-105	1.872e-103
AO090120000287	5	3418874	3421231	2357	3230.11	-2.95	0.11	7.497e-166	2.291e-164		AO090038000016	6	3624335	3625351	1016	6843.39	-2.53	0.12	1.044e-104	3.113e-103
AO090001000716	2	1897445	1899066	1621	10806	3.63	0.13	1.18e-165	3.598e-164		AO090010000391	8	2315613	2317527	1914	1204.73	-3.62	0.17	2.991e-104	8.896e-103
AO090011000716	7	1832219	1833243	1024	1775.53	2.02	0.07	1.329e-165	4.041e-164		AO090120000077	5	2858443	2859700	1257	992.12	2.66	0.12	5.063e-104	1.502e-102
AO090120000372	5	3663311	3664403	1092	941.01	-2.92	0.11	1.639e-165	4.971e-164		AO090103000206	8	753177	754181	1004	313.85	6.41	0.3	6.039e-104	1.786e-102
AO090003001130	2	5185615	5186301	686	754.51	-4.36	0.16	3.267e-165	9.88e-164		AO090010000355	8	2400245	2401830	1585	815.86	-3.92	0.18	6.595e-104	1.946e-102
AO090026000248	3	4420645	4421851	1206	719.25	2.67	0.1	1.41e-164	4.255e-163		AO090003001444	2	5972838	5973648	810	1476.35	-4	0.19	9.296e-104	2.736e-102
AO090011000802	7	2045091	2046110	1019	4865.24	-2.05	0.08	3.33e-164	1.002e-162		AO090003001340	2	5725366	5727355	1989	2983.7	-1.83	0.09	9.608e-104	2.82e-102
AO090102000581	4	2955312	2960061	4749	4525.2	-2.09	0.08	1.001e-163	3.004e-162		AO090011000203	7	527348	528182	834	799.42	4.3	0.2	2.011e-103	5.866e-102
AO090012000585	4	1488814	1489654	840	6375.39	2.56	0.09	1.172e-163	3.508e-162		AO090023000133	3	339614	340259	645	2931.69	2.53	0.12	2.014e-103	5.866e-102
AO090001000310	2	787236	788442	1206	462.05	4.44	0.16	1.302e-163	3.889e-162		AO090102000125	4	4214534	4215763	1229	2492.64	-4.64	0.22	2.011e-103	5.866e-102
AO090701000738	5	414945	415644	699	12481.9	4.33	0.16	2.38e-163	7.087e-162		AO090005001211	1	3221746	3223128	1382	1832.25	4.23	0.2	5.016e-103	1.457e-101
AO090003000023	2	2150778	2154484	3706	1825.76	-2.28	0.08	2.704e-163	8.031e-162		AO090005000575	1	4933521	4934253	732	822.74	2.34	0.11	8.45e-103	2.449e-101
AO090012000977	4	2533755	2534558	803	6487.76	3.65	0.13	4.15e-163	1.23e-161		AO090003000055	2	2234548	2236118	1570	161381	3.11	0.15	1.156e-102	3.34e-101
AO090026000506	3	3697588	3699424	1836	1028.24	2.34	0.09	1.32e-162	3.9e-161		AO090005001467	1	2550429	2552877	2448	22244.1	3.15	0.15	1.327e-102	3.827e-101
AO090102000393	4	3449280	3450434	1154	5004.56	-1.88	0.07	1.422e-162	4.191e-161		AO090001000704	2	1860081	1861875	1794	584.51	3.18	0.15	2.222e-102	6.389e-101
AO090005001238	1	3139514	3141933	2419	6213.37	-2.17	0.08	1.521e-162	4.471e-161		AO090005000217	1	5863879	5865484	1605	2471.27	-9.78	0.46	4.503e-102	1.292e-100
AO090012000593	4	1506388	1506838	450	1552.31	2.51	0.09	3.407e-162	9.991e-161		AO090124000068	5	2512468	2514635	2167	676.9	-6.9	0.32	5.179e-102	1.482e-100
AO090701000669	5	613479	615033	1554	1300.43	3.21	0.12	5.842e-162	1.709e-160		AO090012000708	4	1803472	1803993	521	1380.44	-4.99	0.23	5.503e-102	1.571e-100
AO090011000885	7	2264418	2265035	617	2088.64	3.49	0.13	7.294e-162	2.128e-160		AO090020000267	6	1154679	1156618	1939	552.05	-4.55	0.21	8.007e-102	2.28e-100
AO090038000395	6	2622988	2624374	1386	217915	2.4	0.09	1.283e-161	3.735e-160		AO090003001556	2	6254239	6256001	1762	636.57	-3.96	0.19	8.637e-102	2.453e-100
AO090001000163	2	370772	372264	1492	4482.44	-3.13	0.12	1.824e-161	5.295e-160		AO090010000555	8	1921427	1922220	793	632.08	-5.9	0.28	9.046e-102	2.563e-100
AO090005001117	1	3450657	3451906	1249	28822.7	2.22	0.08	2.782e-161	8.057e-160		AO090005000638	1	4750251	4751202	951	8494.83	-5.11	0.24	1.006e-101	2.843e-100
AO090206000078	7	2790843	2791944	1101	3465.47	2.42	0.09	3.542e-161	1.023e-159		AO090012000376	4	928073	929659	1586	954.93	-7.41	0.35	1.281e-101	3.611e-100
AO090701000206	5	1790572	1792253	1681	17300.8	-3.59	0.13	1.084e-160	3.125e-159		AO090010000654	8	1681412	1683164	1752	1227.35	3.75	0.18	1.439e-101	4.046e-100
AO090012000129	4	312120	313055	935	3775.28	2.68	0.1	1.305e-160	3.752e-159		AO090009000522	1	1391435	1393186	1751	1324.33	3.45	0.16	2.253e-101	6.318e-100
AO090023000654	3	1724208	1725353	1145	30452.1	2.64	0.1	3.588e-160	1.029e-158		AO090138000173	6	3776680	3780007	3327	493.77	-3.99	0.19	3.017e-101	8.441e-100
AO090001000598	2	1563663	1564519	856	1142.98	-3.27	0.12	4.22e-160	1.207e-158		AO090009000628	1	1673706	1675731	2025	5499.27	-4.51	0.21	6.336e-101	1.768e-99
AO090012000463	4	1155611	1156194	583	1556.54	3.34	0.12	5.089e-160	1.452e-158		AO090026000207	3	4525919	4527764	1845	10093.9	-4.66	0.22	7.175e-101	1.998e-99
AO090023000602	3	1585266	1587665	2399	2827.32	-2.43	0.09	8.226e-160	2.342e-158		AO090005001631	1	2070577	2071469	892	1040.74	2.54	0.12	1.008e-100	2.8e-99
AO090003000866	2	4443211	4446407	3196	2492.45	-2.19	0.08	1.5e-159	4.258e-158		AO090038000258	6	2989017	2990053	1036	4927.41	-2.85	0.13	1.468e-100	4.066e-99
AO090020000119	6	1511740	1516825	5085	10485.9	2.45	0.09	2.037e-159	5.77e-158		AO090701000026	5	2282355	2283573	1218	6218.5	2.07	0.1	1.531e-100	4.232e-99
AO090005000828	1	4201334	4203068	1734	7026.59	3.49	0.13	2.628e-159	7.427e-158		AO090001000625	2	1634828	1637037	2209	614.11	-5.86	0.28	2.015e-100	5.555e-99
AO090038000553	6	2158256	2159618	1362	5470.05	3.3	0.12	5.121e-159	1.444e-157		AO090026000284	3	4312188	4314513	2325	4620.42	3.36	0.16	5.778e-100	1.589e-98
AO090023000626	3	1641944	1645822	3878	5431.74	3.15	0.12	1.017e-158	2.859e-157		AO090005000100	1	6174735	6175231	496	1354.87	2.21	0.1	6.014e-100	1.65e-98
AO090010000461	8	2159511	2160288	777	683.58	3.26	0.12	1.278e-158	3.586e-157		AO090023000812	3	2113597	2115132	1535	924.94	2.99	0.14	7.512e-100	2.056e-98
AO090020000315	6	1044017	1045930	1913	1460.65	-2.91	0.11	1.566e-158	4.383e-157		AO090038000629	6	1950014	1951045	1031	1008.12	-2.7	0.13	9.12e-100	2.49e-98
AO090011000374	7	954494	955450	956	2461.45	-3.93	0.15	6.546e-158	1.827e-156		AO090005000767	1	4369042	4370083	1041	1031.72	-7.07	0.34	1.23e-99	3.349e-98
AO090011000720	7	1845218	1846824	1606	1769.77	2.11	0.08	1.237e-157	3.444e-156		AO090003000497	2	3427034	3428538	1504	1315.37	-3.58	0.17	2.111e-99	5.736e-98
AO090011000302	7	761830	762769	939	2518.9	-4.25	0.16	1.499e-157	4.165e-156		AO090023000245	3	620827	622601	1774	10025.6	3.27	0.16	3.387e-99	9.181e-98
AO090005000551	1	4982607	4983276	669	801.63	3.1	0.12	2.328e-157	6.452e-156		AO090003001508	2	6133255	6134958	1703	2944.61	-2.63	0.13	8.311e-99	2.248e-97
AO090102000205	4	4008730	4010831	2101	12483.4	2.07	0.08	3.118e-157	8.622e-156		AO090005001457	1	2571379	2572547	1168	2904.87	-4.46	0.21	8.91e-99	2.404e-97
AO090011000376	7	957160	959545	2385	23329.8	2.1	0.08	4.31e-157	1.189e-155		AO090026000157	3	4678924	4681200	2276	1259.24	-3.11	0.15	1.128e-98	3.035e-97
AO090026000487	3	3747188	3748389	1201	6808.05	2.48	0.09	4.437e-157	1.221e-155		AO090023000800	3	2075404	2077240	1836	1013.87	-3.33	0.16	1.275e-98	3.424e-97
AO090102000535	4	3073174	3073808	634	3574.7	2.61	0.1	5.244e-157	1.44e-155		AO090012000034	4	71301	72969	1668	2752.97	-9.7	0.46	1.639e-98	4.392e-97
AO090124000051	5	2562899	2564277	1378	2080.23	-2.6	0.1	5.978e-157	1.637e-155		AO090102000121	4	4223579	4224738	1159	2891.57	2.28	0.11	2.443e-98	6.528e-97
AO090003000029	2	2174181	2174764	583	2271.08	2.03	0.08	1.056e-156	2.886e-155		AO090011000154	7	418656	419745	1089	548.79	3.63	0.17	2.466e-98	6.575e-97
AO090103000108	8	991280	992031	751	286.48	4.78	0.18	1.445e-156	3.941e-155		AO090011000447	7	1128937	1131777	2840	3650.2	-3.08	0.15	1.011e-97	2.689e-96
AO090010000018	8	3353141	3353616	475	36307.4	2.93	0.11	2.436e-156	6.625e-155		AO090003001017	2	4843350	4844662	1312	685.94	-3.67	0.18	1.102e-97	2.924e-96
AO090138000060	6	4071513	4072193	680	618.34	3.2	0.12	3.158e-156	8.569e-155		AO090005000086	1	6205403	6206688	1285	6268.92	3.2	0.15	1.106e-97	2.929e-96
AO090020000479	6	600534	602414	1880	328.75	4.67	0.18	3.809e-156	1.031e-154		AO090010000153	8	3002270	3002912	642	831.42	3.84	0.18	1.163e-97	3.072e-96
AO090001000390	2	982114	983932	1818	3989.51	-2.03	0.08	5.852e-156	1.581e-154		AO090003000159	2	2522296	2523359	1063	453.65	-4.64	0.22	1.395e-97	3.677e-96
AO090038000279	6	2936115	2937151	1036	44186.9	2.27	0.09	6.355e-156	1.713e-154		AO090103000025	8	1203033	1204803	1770	7399.47	-4.21	0.2	2.045e-97	5.377e-96
AO090103000150	8	877082	878069	987	418.85	3.14	0.12	1.708e-155	4.593e-154		AO090023000491	3	1273860	1275585	1725	417.48	-3.98	0.19	2.422e-97	6.352e-96
AO090138000024	6	4145418	4148850	3432	7683.57	4.34	0.16	4.426e-155	1.187e-153		AO090005001124	1	3433559	3435188	1629	4142.66	2.04	0.1	2.54e-97	6.646e-96
AO090012000122	4	297557	298426	869	999.71	-4.55	0.17	4.602e-155	1.231e-153		AO090005000909	1	3990195	3992690	2495	1417.95	-8.56	0.41	2.669e-97	6.968e-96
AO090138000093	6	4000223	4001032	809	1157.86	2.58	0.1	5.611e-155	1.498e-153		AO090012000626	4	1602265	1603111	846	22076.3	12.08	0.59	1.22e-96	3.178e-95
AO090005001212	1	3216747	3218555	1808	5128.63	-1.99	0.08	7.135e-155	1.901e-153		AO090010000541	8	1950287	1951081	794	1595.79	4.34	0.21	2.25e-96	5.847e-95
AO090023000648	3	1703400	1704402	1002	1435.77	2.34	0.09	7.544e-155	2.005e-153		AO090038000357	6	2733877	2735348	1471	35119.3	3	0.14	3.22e-96	8.349e-95
AO090120000435	5	3852004	3852493	489	577.36	2.97	0.11	9.536e-155	2.529e-153		AO090020000085	6	1591187	1592607	1420	1998.1	2.69	0.13	4.748e-96	1.228e-94
AO090005000488	1	5140337	5142385	2048	552.75	2.83	0.11	2.366e-154	6.259e-153		AO090026000066	3	4951340	4954462	3122	819.04	3.5	0.17	5.248e-96	1.355e-94
AO090011000341	7	869720	872800	3080	8339.97	1.68	0.06	5.821e-154	1.537e-152		AO090005001355	1	2810016	2810485	469	825.22	2.83	0.14	1.886e-95	4.858e-94
AO090012000399	4	981047	982423	1376	5597.43	2.02	0.08	9.496e-154	2.501e-152		AO090003000704	2	3995054	3995516	462	1631.11	-3.44	0.17	2.074e-95	5.329e-94
AO090010000211	8	2838795	2840190	1395	4391.37	2.37	0.09	1.242e-153	3.263e-152		AO090001000717	2	1906296	1910386	4090	70658.4	-4.23	0.21	5.271e-95	1.351e-93
AO090012000701	4	1778987	1779944	957	715.74	-3.45	0.13	1.338e-153	3.507e-152		AO090005001564	1	2241722	2243340	1618	3655.41	-3.3	0.16	5.367e-95	1.373e-93
AO090005001075	1	3576141	3576900	759	882.73	2.4	0.09	1.366e-153	3.574e-152		AO090003000729	2	4056034	4057658	1624	22782.5	3.51	0.17	8.056e-95	2.056e-93
AO090003000216	2	2660904	2662242	1338	843.03	-3.35	0.13	1.549e-153	4.043e-152		AO090012000197	4	483634	489237	5603	2997.47	2.44	0.12	8.6e-95	2.19e-93
AO090023000807	3	2100096	2101240	1144	4178.21	2.49	0.09	4.249e-153	1.106e-151		AO090020000499	6	552760	554986	2226	602.48	-4.11	0.2	1.018e-94	2.587e-93
AO090038000314	6	2834610	2836334	1724	33782.4	-3.73	0.14	8.015e-153	2.083e-151		AO090010000385	8	2327340	2328856	1516	478.2	-3.4	0.17	1.452e-94	3.68e-93
AO090103000212	8	743459	744432	973	4903.06	-2.22	0.08	1.783e-152	4.622e-151		AO090701000363	5	1377011	1377797	786	1149.81	-5.96	0.29	2.768e-94	7e-93
AO090023000646	3	1695636	1697414	1778	1653.1	3.21	0.12	3.535e-152	9.144e-151		AO090003000611	2	3734901	3736510	1609	6119.23	3.49	0.17	3.105e-94	7.835e-93
AO090009000293	1	780315	780758	443	902.61	2.58	0.1	4.341e-152	1.12e-150		AO090038000224	6	3070619	3072633	2014	9288.32	2.95	0.14	1.462e-93	3.682e-92
AO090026000192	3	4571630	4572551	921	6494.59	2.04	0.08	5.057e-152	1.302e-150		AO090003000261	2	2785342	2786628	1286	22332.8	-11.58	0.57	1.655e-93	4.158e-92
AO090003000876	2	4464880	4466788	1908	3639.05	-2.62	0.1	8.699e-152	2.235e-150		AO090206000037	7	2671978	2672999	1021	3559.66	2.53	0.12	1.779e-93	4.46e-92
AO090005001301	1	2934458	2935121	663	1766.13	2.26	0.09	2.466e-151	6.322e-150		AO090103000343	8	392003	393184	1181	4909.34	-4.48	0.22	2.042e-93	5.107e-92
AO090023000487	3	1260345	1262073	1728	3792.1	1.55	0.06	2.577e-151	6.593e-150		AO090138000033	6	4128160	4130190	2030	837.14	2.32	0.11	2.111e-93	5.269e-92
AO090020000396	6	833901	834831	930	4745.2	2.43	0.09	2.625e-151	6.701e-150		AO090011000876	7	2245721	2247905	2184	7179.66	3.41	0.17	2.215e-93	5.515e-92
AO090701000424	5	1222119	1223072	953	393.37	7.03	0.27	8.377e-151	2.133e-149		AO090005000337	1	5568360	5570541	2181	633.43	-3.1	0.15	4.506e-93	1.12e-91
AO090005000456	1	5236847	5238286	1439	45210.1	2.35	0.09	1.165e-150	2.962e-149		AO090011000012	7	25244	28910	3666	550.5	-4.17	0.21	4.632e-93	1.148e-91
AO090003000047	2	2213453	2214995	1542	1526.31	1.9	0.07	1.224e-150	3.103e-149		AO090103000085	8	1041149	1043178	2029	1123.06	-4.19	0.21	5.653e-93	1.399e-91
AO090005000460	1	5223664	5228425	4761	7509.25	2.36	0.09	2.34e-150	5.92e-149		AO090001000381	2	957547	960460	2913	2612.89	-4.54	0.22	7.856e-93	1.939e-91
AO090011000419	7	1067383	1068467	1084	1722.72	3.43	0.13	4.996e-150	1.261e-148		AO090023000335	3	858081	858990	909	1679.5	3.79	0.19	8.084e-93	1.991e-91
AO090003000180	2	2579955	2581524	1569	5479.58	2.25	0.09	5.554e-150	1.399e-148		AO090005000135	1	6079830	6081083	1253	3714.54	4.13	0.2	1.008e-92	2.478e-91
AO090001000750	2	1995552	1996741	1189	5393.69	1.99	0.08	1.326e-149	3.333e-148		AO090003000081	2	2308459	2309829	1370	3338.23	3.28	0.16	1.276e-92	3.129e-91
AO090009000355	1	947359	948199	840	3208.45	2.78	0.11	1.803e-149	4.522e-148		AO090012000843	4	2172232	2172655	423	3651.87	-2.34	0.12	1.309e-92	3.203e-91
AO090012000239	4	587790	588414	624	1156.46	2.41	0.09	4.789e-149	1.199e-147		AO090701000042	5	2242824	2245541	2717	945.68	-2.84	0.14	1.721e-92	4.202e-91
AO090012000680	4	1723711	1725571	1860	1250.22	-2.73	0.11	8.118e-149	2.028e-147		AO090001000311	2	790971	794672	3701	519.53	-4.18	0.21	2.558e-92	6.234e-91
AO090001000166	2	376220	376808	588	1556.34	3.87	0.15	9.926e-149	2.474e-147		AO090003001421	2	5921564	5924717	3153	1198.26	-3.92	0.19	2.625e-92	6.383e-91
AO090010000615	8	1784111	1785816	1705	766.67	-3.45	0.13	1.331e-148	3.31e-147		AO090010000020	8	3350173	3350812	639	941.79	-4.07	0.2	3.15e-92	7.644e-91
AO090003000154	2	2509335	2511109	1774	2375.45	1.8	0.07	2.153e-148	5.343e-147		AO090011000768	7	1958435	1959908	1473	1223.26	2.77	0.14	3.415e-92	8.269e-91
AO090005000416	1	5359498	5363052	3554	12846.1	1.83	0.07	4.699e-148	1.164e-146		AO090701000035	5	2262830	2264714	1884	701.56	-4.61	0.23	6.155e-92	1.487e-90
AO090026000613	3	3419845	3422529	2684	18823.5	2.12	0.08	4.959e-148	1.225e-146		AO090023000781	3	2029881	2034078	4197	2741.74	2.02	0.1	1.137e-91	2.74e-90
AO090003000603	2	3705066	3706274	1208	1520.55	2.57	0.1	5.447e-148	1.343e-146		AO090701000510	5	1010769	1011531	762	1627.21	-4.24	0.21	1.33e-91	3.2e-90
AO090011000041	7	117021	117666	645	850.23	-3.18	0.12	8.656e-148	2.13e-146		AO090011000275	7	706504	707971	1467	293.14	5.88	0.29	1.365e-91	3.276e-90
AO090012000623	4	1591520	1593260	1740	34686.6	-3.53	0.14	1.132e-147	2.779e-146		AO090038000195	6	3166836	3168347	1511	4118.98	-3.92	0.19	1.396e-91	3.344e-90
AO090003000722	2	4036454	4037384	930	2688.55	1.65	0.06	1.456e-147	3.568e-146		AO090023000476	3	1219281	1219959	678	3519.36	2.08	0.1	1.78e-91	4.255e-90
AO090023000908	3	2379593	2380897	1304	4273.93	1.59	0.06	7.482e-147	1.829e-145		AO090005000031	1	6349785	6351099	1314	3493.05	2.09	0.1	1.883e-91	4.491e-90
AO090005000449	1	5253044	5254970	1926	277.3	5.84	0.23	2.293e-146	5.596e-145		AO090026000187	3	4594841	4597160	2319	3201.95	-7.41	0.37	2.058e-91	4.898e-90
AO090020000070	6	1629667	1632099	2432	1443.19	2.46	0.1	2.4e-146	5.843e-145		AO090026000111	3	4801558	4806432	4874	1031	-5.5	0.27	2.271e-91	5.394e-90
AO090001000224	2	540351	541810	1459	29450.6	2.3	0.09	3.184e-146	7.737e-145		AO090001000484	2	1222574	1225064	2490	6220.55	3.48	0.17	2.954e-91	7.002e-90
AO090010000518	8	2007275	2008964	1689	644.76	-3.92	0.15	3.426e-146	8.307e-145		AO090011000663	7	1714554	1714974	420	906.14	-3.49	0.17	3.231e-91	7.644e-90
AO090023000518	3	1350474	1352066	1592	3656.73	-2.46	0.1	4.285e-146	1.037e-144		AO090009000301	1	800324	801275	951	3410.92	2.27	0.11	3.297e-91	7.783e-90
AO090011000607	7	1546398	1547376	978	2070.59	2.04	0.08	6.967e-146	1.682e-144		AO090003000514	2	3461381	3463435	2054	1461.76	2.06	0.1	3.689e-91	8.691e-90
AO090026000293	3	4278704	4280228	1524	4511.65	1.93	0.08	5.893e-145	1.42e-143		AO090003001082	2	5030094	5030915	821	6999.71	2.2	0.11	4.836e-91	1.137e-89
AO090103000220	8	709556	712315	2759	276.67	5.02	0.2	6.572e-145	1.58e-143		AO090005001072	1	3580138	3582493	2355	1860.61	2.85	0.14	5.491e-91	1.288e-89
AO090012000626	4	1602265	1603111	846	38557.1	-1.85	0.07	1.397e-144	3.351e-143		AO090012000044	4	93633	94746	1113	1153.58	-5.11	0.25	5.595e-91	1.31e-89
AO090001000525	2	1367071	1369474	2403	2722.29	1.86	0.07	1.579e-144	3.781e-143		AO090120000371	5	3661942	3663103	1161	2885.4	-2.65	0.13	5.661e-91	1.323e-89
AO090038000465	6	2426598	2427112	514	1395.86	2.58	0.1	1.923e-144	4.595e-143		AO090026000138	3	4729842	4731723	1881	3540.39	2.21	0.11	6.024e-91	1.405e-89
AO090005000556	1	4968279	4969125	846	649.67	3.49	0.14	2.933e-144	6.994e-143		AO090020000403	6	814773	817836	3063	194024	2.67	0.13	7.63e-91	1.775e-89
AO090023000688	3	1811685	1812789	1104	4842.07	6.99	0.28	3.229e-144	7.686e-143		AO090026000267	3	4353179	4354066	887	24820.8	3.14	0.16	8.652e-91	2.009e-89
AO090026000299	3	4268080	4269578	1498	616.82	-4.32	0.17	8.257e-144	1.961e-142		AO090701000069	5	2164456	2164873	417	1088.03	2.18	0.11	9.414e-91	2.181e-89
AO090005000810	1	4246800	4248475	1675	4211.88	3.2	0.13	8.985e-144	2.13e-142		AO090026000131	3	4750602	4752566	1964	922.11	-5.91	0.3	1.173e-90	2.713e-89
AO090003000457	2	3313191	3313671	480	30211.3	3.36	0.13	9.968e-144	2.358e-142		AO090012000392	4	963724	964549	825	552.33	-3.41	0.17	1.292e-90	2.981e-89
AO090003000770	2	4164628	4167038	2410	12191.9	3.78	0.15	1.165e-143	2.75e-142		AO090005001181	1	3297085	3298211	1126	2353.83	-5.44	0.27	1.301e-90	2.996e-89
AO090009000066	1	186297	187301	1004	645.92	-4.99	0.2	1.679e-143	3.955e-142		AO090026000741	3	3093106	3094738	1632	2390.91	-2.75	0.14	1.558e-90	3.581e-89
AO090005001622	1	2086983	2087756	773	25270	2.16	0.08	2.367e-143	5.565e-142		AO090012000001	4	272	2039	1767	1617.37	-8.56	0.43	1.643e-90	3.769e-89
AO090003001501	2	6113124	6114564	1440	603.23	-4.68	0.18	3.71e-143	8.704e-142		AO090005001050	1	3635029	3635836	807	4914.17	-10.72	0.54	1.861e-90	4.26e-89
AO090026000635	3	3364294	3366496	2202	8664.16	1.7	0.07	6.056e-143	1.418e-141		AO090023000854	3	2231041	2232064	1023	11675.4	1.92	0.1	2.619e-90	5.984e-89
AO090003000243	2	2738232	2739812	1580	2896.01	-3.42	0.13	6.589e-143	1.54e-141		AO090026000648	3	3335122	3335802	680	5216.99	-3.4	0.17	3.152e-90	7.185e-89
AO090005001331	1	2858630	2859207	577	1671.33	-2.52	0.1	7.399e-143	1.725e-141		AO090023000726	3	1909798	1913341	3543	835.93	2.78	0.14	3.239e-90	7.37e-89
AO090206r00001	7	2922896	2924695	1799	17610.7	2.42	0.1	1.122e-142	2.611e-141		AO090005000274	1	5705933	5708245	2312	10244.5	2.99	0.15	3.678e-90	8.351e-89
AO090005001315	1	2903478	2905672	2194	6881.23	1.76	0.07	1.334e-142	3.1e-141		AO090701000729	5	433467	434905	1438	4673.9	4.72	0.24	6.276e-90	1.422e-88
AO090003001429	2	5942889	5944688	1799	1022.52	-3.33	0.13	1.501e-142	3.48e-141		AO090010000469	8	2138793	2139620	827	3630.98	3.73	0.19	1.106e-89	2.502e-88
AO090120000350	5	3623775	3626392	2617	7870.71	2.94	0.12	1.812e-142	4.192e-141		AO090003001505	2	6120336	6121001	665	458.12	-4.54	0.23	1.523e-89	3.439e-88
AO090012000712	4	1815867	1816886	1019	425.85	3.21	0.13	2.534e-142	5.852e-141		AO090023000685	3	1799895	1801959	2064	1998.02	2.08	0.1	1.645e-89	3.706e-88
AO090010000350	8	2421028	2425025	3997	2050.22	2.48	0.1	2.947e-142	6.791e-141		AO090005000534	1	5029090	5030560	1470	3817.55	-4.36	0.22	1.976e-89	4.442e-88
AO090701000896	5	26859	28009	1150	1384.31	-7.44	0.3	3.76e-142	8.647e-141		AO090124000047	5	2570943	2572695	1752	6445.19	-2.72	0.14	2.827e-89	6.343e-88
AO090005000808	1	4250500	4251070	570	1619.51	2.55	0.1	5.392e-142	1.238e-140		AO090001000418	2	1056617	1058071	1454	559.99	3.18	0.16	3.941e-89	8.824e-88
AO090010000517	8	2013757	2015098	1341	2657.05	2.34	0.09	1.114e-141	2.551e-140		AO090011000376	7	957160	959545	2385	15044.7	2.47	0.12	4.376e-89	9.78e-88
AO090023000995	3	2630785	2633339	2554	1513.74	-2.34	0.09	1.161e-141	2.654e-140		AO090026000050	3	4989985	4992080	2095	606.31	-6.41	0.32	4.483e-89	9.998e-88
AO090003000129	2	2441781	2443721	1940	582.57	-3.92	0.16	1.227e-141	2.799e-140		AO090023000131	3	335944	337498	1554	383.46	-4.19	0.21	8.564e-89	1.906e-87
AO090020000458	6	657374	658309	935	1715.61	2.46	0.1	1.755e-141	3.997e-140		AO090001000649	2	1713656	1716256	2600	1555.62	-2.57	0.13	1.406e-88	3.123e-87
AO090003000105	2	2371223	2373055	1832	3439.18	-2.08	0.08	2.53e-141	5.749e-140		AO090005001148	1	3376496	3378526	2030	2721.6	2.32	0.12	1.456e-88	3.228e-87
AO090026000057	3	4973404	4975744	2340	3260.82	-2.4	0.1	4.974e-141	1.128e-139		AO090001000636	2	1677780	1679583	1803	1749.86	2.86	0.14	3.14e-88	6.949e-87
AO090011000937	7	2458621	2459923	1302	2049.66	-2.98	0.12	1.868e-140	4.23e-139		AO090011000077	7	225865	227706	1841	671.94	-2.51	0.13	4.076e-88	9.003e-87
AO090012000729	4	1860804	1862100	1296	3139.07	2.48	0.1	1.999e-140	4.516e-139		AO090102000604	4	2891645	2893091	1446	693.78	2.98	0.15	5.082e-88	1.12e-86
AO090005001087	1	3541688	3543894	2206	6552.1	1.68	0.07	5.267e-140	1.188e-138		AO090003000932	2	4625009	4626041	1032	1043.15	-4.48	0.23	6.17e-88	1.358e-86
AO090012000727	4	1854985	1857951	2966	2328.58	-2.34	0.09	7.894e-140	1.777e-138		AO090120000194	5	3171652	3173400	1748	2037.38	1.72	0.09	8.675e-88	1.905e-86
AO090023000264	3	677862	679055	1193	10315.4	-2.14	0.09	3.421e-139	7.684e-138		AO090026000332	3	4169818	4170445	627	906.07	2.44	0.12	8.9e-88	1.951e-86
AO090003001270	2	5537028	5537703	675	439.2	2.75	0.11	3.939e-139	8.824e-138		AO090026000530	3	3629549	3631403	1854	1252.32	-3.93	0.2	1.626e-87	3.556e-86
AO090701000442	5	1180995	1181706	711	1688.33	2.22	0.09	3.943e-139	8.824e-138		AO090005001361	1	2793667	2794950	1283	8014.11	2.46	0.12	1.763e-87	3.841e-86
AO090009000622	1	1656050	1657583	1533	3425.33	1.7	0.07	3.976e-139	8.88e-138		AO090701000311	5	1528704	1530734	2030	3090.24	-3.47	0.18	1.76e-87	3.841e-86
AO090005000812	1	4242340	4243126	786	18871.7	2.26	0.09	4.601e-139	1.026e-137		AO090023000098	3	245426	247033	1607	449.55	2.78	0.14	1.927e-87	4.19e-86
AO090003000789	2	4208233	4210221	1988	2677.78	-2.68	0.11	5.856e-139	1.303e-137		AO090103000359	8	337853	338867	1014	807.55	-6.36	0.32	2.043e-87	4.434e-86
AO090001000414	2	1043515	1049781	6266	3888.25	-2.23	0.09	8.13e-139	1.805e-137		AO090005001275	1	3042552	3043800	1248	651.02	2.44	0.12	4.197e-87	9.093e-86
AO090701000709	5	499552	501552	2000	4084.21	1.78	0.07	9.383e-139	2.08e-137		AO090102000588	4	2934891	2935975	1084	7859.45	-5.11	0.26	4.23e-87	9.148e-86
AO090011000238	7	607706	609373	1667	5046.69	-4.1	0.16	9.629e-139	2.13e-137		AO090026000421	3	3934312	3935234	922	1761.68	2.27	0.12	4.258e-87	9.191e-86
AO090701000536	5	933992	935072	1080	8428.97	-1.93	0.08	1.498e-138	3.308e-137		AO090023000206	3	518375	520514	2139	20502.2	2.02	0.1	9.867e-87	2.126e-85
AO090003000324	2	2976177	2976837	660	2107	1.81	0.07	1.903e-138	4.195e-137		AO090010000472	8	2127442	2131258	3816	23178.3	2.34	0.12	1.054e-86	2.266e-85
AO090003000919	2	4587804	4588632	828	19967.5	3.69	0.15	4.072e-138	8.956e-137		AO090026000641	3	3352911	3354160	1249	4047.8	-3.44	0.18	1.063e-86	2.281e-85
AO090020000084	6	1593296	1595117	1821	13843.6	1.3	0.05	8.307e-138	1.824e-136		AO090026000141	3	4723401	4725125	1724	7841.01	3.67	0.19	1.334e-86	2.857e-85
AO090113000073	5	4226446	4227746	1300	803.74	3.63	0.15	4.004e-137	8.774e-136		AO090103000075	8	1063484	1065370	1886	336.02	7.18	0.37	1.76e-86	3.762e-85
AO090009000492	1	1309754	1311808	2054	29456.2	2.71	0.11	4.098e-137	8.963e-136		AO090005001197	1	3261537	3262931	1394	7963	-4.37	0.22	2.136e-86	4.558e-85
AO090005000482	1	5155981	5158057	2076	438.14	3.63	0.15	2.859e-136	6.242e-135		AO090005000768	1	4368054	4368978	924	865.22	-7.53	0.39	2.149e-86	4.578e-85
AO090026000164	3	4653619	4655365	1746	3235.06	1.81	0.07	2.975e-136	6.483e-135		AO090005001230	1	3166942	3169138	2196	15293.3	2.12	0.11	2.39e-86	5.08e-85
AO090012000415	4	1019963	1021391	1428	2309	2.04	0.08	4.785e-136	1.041e-134		AO090701000082	5	2138431	2139139	708	719.59	2.83	0.14	3.918e-86	8.314e-85
AO090701000408	5	1264228	1265413	1185	811.12	-5.94	0.24	1.782e-135	3.868e-134		AO090012000590	4	1499189	1500080	891	1707.66	2.79	0.14	4.9e-86	1.038e-84
AO090011000553	7	1395770	1397527	1757	4704.72	-2.16	0.09	2.762e-135	5.984e-134		AO090012000796	4	2044765	2046675	1910	6214.02	2.67	0.14	7.423e-86	1.569e-84
AO090701000110	5	2070248	2071685	1437	2164.62	-2.35	0.1	3.465e-135	7.494e-134		AO090020000151	6	1430584	1433569	2985	1144.35	-3.98	0.2	1.22e-85	2.574e-84
AO090005000629	1	4772632	4774093	1461	8846.08	1.86	0.08	6.445e-135	1.391e-133		AO090001000443	2	1119049	1121707	2658	416.21	2.75	0.14	1.445e-85	3.044e-84
AO090023000050	3	130012	130996	984	812.5	-6.08	0.25	9.953e-135	2.145e-133		AO090005000476	1	5177363	5179310	1947	391.92	-4.12	0.21	2.143e-85	4.506e-84
AO090009000434	1	1137508	1138493	985	1148.69	2.39	0.1	1.014e-134	2.181e-133		AO090001000327	2	833655	835238	1583	11690.6	2.61	0.13	2.42e-85	5.078e-84
AO090120000305	5	3484498	3487238	2740	6917.37	1.77	0.07	1.264e-134	2.714e-133		AO090005000672	1	4652973	4655265	2292	898.35	-6.63	0.34	3.02e-85	6.325e-84
AO090009000397	1	1058592	1059744	1152	3354.69	2.25	0.09	1.803e-134	3.864e-133		AO090011000036	7	98544	100674	2130	1469.22	-6.88	0.35	3.201e-85	6.692e-84
AO090020000091	6	1574227	1578187	3960	2968.54	1.98	0.08	3.679e-134	7.87e-133		AO090124000067	5	2515131	2516898	1767	738.68	-3.96	0.2	3.609e-85	7.531e-84
AO090023000273	3	711630	712632	1002	985.27	2.57	0.1	4.361e-134	9.31e-133		AO090026000663	3	3288779	3290972	2193	3495.24	1.91	0.1	4.228e-85	8.806e-84
AO090023000500	3	1306203	1307211	1008	5090.39	-2.13	0.09	4.471e-134	9.527e-133		AO090701000127	5	2001444	2001814	370	1540.73	2.41	0.12	4.372e-85	9.089e-84
AO090011000854	7	2180830	2184996	4166	6658.57	-1.85	0.08	1.197e-133	2.546e-132		AO090010000019	8	3351264	3352060	796	1243.26	-3.19	0.16	4.606e-85	9.558e-84
AO090701000057	5	2193835	2196313	2478	3725.96	1.76	0.07	1.459e-133	3.098e-132		AO090003000444	2	3274021	3275794	1773	4530.98	-2.48	0.13	5.923e-85	1.227e-83
AO090012000521	4	1327630	1328115	485	3149.83	3.17	0.13	1.487e-133	3.152e-132		AO090023000602	3	1585266	1587665	2399	29106.2	-3.68	0.19	6.006e-85	1.242e-83
AO090010000463	8	2156268	2157582	1314	53678.2	2.2	0.09	1.648e-133	3.486e-132		AO090026000252	3	4408510	4409964	1454	1499.69	-3.32	0.17	6.297e-85	1.3e-83
AO090023000501	3	1307530	1308153	623	1184.32	2.4	0.1	1.968e-133	4.155e-132		AO090701000449	5	1162731	1164498	1767	677.06	-6.27	0.32	6.994e-85	1.441e-83
AO090138000056	6	4079037	4080024	987	1483.24	3.17	0.13	2.053e-133	4.328e-132		AO090001000498	2	1281492	1281985	493	4895.49	2.05	0.11	2.111e-84	4.341e-83
AO090038000167	6	3241468	3243097	1629	1336.22	4.04	0.17	2.828e-133	5.95e-132		AO090023000752	3	1967553	1969721	2168	2228.96	3.21	0.17	2.176e-84	4.466e-83
AO090012000303	4	754605	755573	968	11420	3.04	0.12	3.521e-133	7.395e-132		AO090311000002	6	1880387	1883542	3155	3113.13	1.93	0.1	5.002e-84	1.025e-82
AO090009000285	1	752561	753712	1151	934.28	-2.54	0.1	5.939e-133	1.245e-131		AO090011000396	7	1015034	1016150	1116	383.21	-3.11	0.16	6.346e-84	1.298e-82
AO090003000861	2	4429777	4431183	1406	2100.73	-1.92	0.08	6.84e-133	1.431e-131		AO090009000068	1	193648	195604	1956	787.15	-2.4	0.12	8.901e-84	1.817e-82
AO090012000353	4	869732	871079	1347	584.8	3.02	0.12	1.39e-132	2.904e-131		AO090020000095	6	1563287	1563848	561	4831.37	-11.31	0.59	1.021e-83	2.082e-82
AO090009000228	1	610957	612342	1385	2687.8	2.13	0.09	1.399e-132	2.918e-131		AO090701000406	5	1269100	1272651	3551	32440.4	-2.69	0.14	1.114e-83	2.266e-82
AO090005000995	1	3762449	3763790	1341	12252.5	2.35	0.1	1.62e-132	3.373e-131		AO090701000189	5	1837246	1839708	2462	685.1	2.72	0.14	1.171e-83	2.377e-82
AO090023000114	3	287495	289444	1949	5461.08	2.59	0.11	2.251e-132	4.676e-131		AO090003000823	2	4306187	4307275	1088	1103.95	-6.31	0.33	1.889e-83	3.83e-82
AO090011000221	7	567036	568429	1393	854.92	2.52	0.1	4.468e-132	9.267e-131		AO090103000470	8	87959	88579	620	401.82	-3.43	0.18	3.756e-83	7.6e-82
AO090011000447	7	1128937	1131777	2840	1558.79	-2.96	0.12	7.233e-132	1.497e-130		AO090020000404	6	812003	813228	1225	644.02	2.31	0.12	3.847e-83	7.771e-82
AO090102000515	4	3122862	3127140	4278	6767.86	1.5	0.06	1.034e-131	2.137e-130		AO090010000336	8	2456198	2457452	1254	1730.27	-2.99	0.16	4.877e-83	9.832e-82
AO090701000743	5	397780	399459	1679	301.41	4.18	0.17	3.239e-131	6.681e-130		AO090020000611	6	271592	274965	3373	2174.94	-3.11	0.16	7.298e-83	1.469e-81
AO090003000495	2	3420889	3423157	2268	1970.38	-3.75	0.15	3.717e-131	7.655e-130		AO090026000149	3	4696779	4704262	7483	552.11	-3.96	0.21	9.122e-83	1.833e-81
AO090120000273	5	3393882	3394567	685	2187.17	1.84	0.08	8.566e-131	1.761e-129		AO090102000099	4	4278831	4281213	2382	1313.19	2.11	0.11	1.684e-82	3.377e-81
AO090020000354	6	947486	949191	1705	795.24	-3.03	0.13	8.968e-131	1.84e-129		AO090020000337	6	987476	988325	849	572.68	3.36	0.18	1.93e-82	3.865e-81
AO090124000050	5	2564443	2566787	2344	1214.36	-2.64	0.11	9.015e-131	1.846e-129		AO090012000934	4	2406405	2407515	1110	1056.3	2.19	0.11	2.009e-82	4.015e-81
AO090023000312	3	790199	791593	1394	3312.76	1.85	0.08	3.134e-130	6.408e-129		AO090005001248	1	3116240	3117723	1483	8481.97	-1.99	0.1	2.83e-82	5.646e-81
AO090012000232	4	574277	575237	960	1817.49	-3.6	0.15	3.668e-130	7.487e-129		AO090005001476	1	2522428	2523009	581	273.19	3.41	0.18	3.373e-82	6.717e-81
AO090701000047	5	2223761	2226846	3085	2600.01	1.64	0.07	6.679e-130	1.361e-128		AO090102000091	4	4310588	4312079	1491	1263.88	-3.57	0.19	4.185e-82	8.319e-81
AO090012000329	4	809724	810978	1254	1421.6	-2.15	0.09	7.295e-130	1.484e-128		AO090003000418	2	3197473	3198118	645	1803.16	2.18	0.11	4.728e-82	9.383e-81
AO090023000011	3	29812	31114	1302	591.91	3.11	0.13	1.006e-129	2.043e-128		AO090103000008	8	1255998	1257434	1436	4195.15	1.62	0.08	5.469e-82	1.083e-80
AO090005000216	1	5865825	5866545	720	564.96	3.03	0.13	1.036e-129	2.101e-128		AO090010000556	8	1920179	1921255	1076	573.24	-5.73	0.3	8.573e-82	1.695e-80
AO090102000639	4	2802025	2805374	3349	15949.8	-1.63	0.07	1.063e-129	2.151e-128		AO090005001140	1	3396212	3402138	5926	1352.08	-4.1	0.22	1.581e-81	3.121e-80
AO090001000587	2	1539427	1541233	1806	2497.42	2.19	0.09	1.128e-129	2.278e-128		AO090009000009	1	38243	39400	1157	755.35	5.13	0.27	2.21e-81	4.355e-80
AO090012000156	4	372956	374470	1514	2833.05	2.79	0.12	1.158e-129	2.336e-128		AO090026000481	3	3765117	3765647	530	2119.52	-2.41	0.13	2.503e-81	4.924e-80
AO090005001074	1	3577456	3578625	1169	1515.2	2.01	0.08	1.509e-129	3.036e-128		AO090005001312	1	2915894	2917454	1560	3643.96	2.6	0.14	3.673e-81	7.212e-80
AO090023000242	3	613812	615283	1471	1158.85	-2.9	0.12	1.618e-129	3.252e-128		AO090020000547	6	423878	424291	413	583.7	-7.11	0.38	4.811e-81	9.432e-80
AO090011000068	7	203318	205072	1754	518.75	-3.19	0.13	3.066e-129	6.15e-128		AO090120000224	5	3260457	3262358	1901	10156.6	3.33	0.18	5.103e-81	9.986e-80
AO090103000390	8	271040	272481	1441	695.69	-2.7	0.11	3.103e-129	6.214e-128		AO090012000323	4	796608	797241	633	582.15	-6.61	0.35	5.15e-81	1.006e-79
AO090003000070	2	2280288	2281412	1124	6120.13	1.48	0.06	3.268e-129	6.534e-128		AO090701000004	5	2346256	2349027	2771	4480.73	1.45	0.08	6.303e-81	1.229e-79
AO090005000497	1	5120446	5121520	1074	1089.19	2.42	0.1	4.104e-129	8.189e-128		AO090011000717	7	1834394	1835484	1090	3127.83	2.05	0.11	6.941e-81	1.351e-79
AO090026000558	3	3554939	3556543	1604	2280.17	1.68	0.07	4.167e-129	8.301e-128		AO090003001350	2	5753336	5754549	1213	828.86	2.42	0.13	1.016e-80	1.975e-79
AO090003000506	2	3447240	3448155	915	14711.4	2.42	0.1	4.234e-129	8.42e-128		AO090103000107	8	994063	995094	1031	508.46	-3.89	0.21	1.027e-80	1.992e-79
AO090102000637	4	2808920	2810009	1089	4992.67	2.81	0.12	5.156e-129	1.024e-127		AO090038000305	6	2853290	2854401	1111	867.97	3.29	0.17	1.206e-80	2.336e-79
AO090003000332	2	2998687	2999602	915	586.53	3.01	0.13	6.417e-129	1.272e-127		AO090011000066	7	200099	201653	1554	756.14	-2.62	0.14	2.49e-80	4.815e-79
AO090020000170	6	1390910	1392663	1753	1154.51	-3.12	0.13	9.563e-129	1.892e-127		AO090023000159	3	403257	404219	962	230.7	6.95	0.37	3.073e-80	5.933e-79
AO090026000718	3	3159639	3160631	992	408.13	4.38	0.18	1.063e-128	2.101e-127		AO090701000658	5	636899	638603	1704	1409.87	-3.83	0.2	3.43e-80	6.611e-79
AO090009000211	1	566449	568389	1940	7928.67	-2.53	0.11	1.33e-128	2.622e-127		AO090003001431	2	5947616	5949051	1435	713.82	-5.39	0.29	3.713e-80	7.143e-79
AO090009000486	1	1286803	1288782	1979	1979.92	-2.52	0.1	1.333e-128	2.624e-127		AO090023000141	3	357872	359126	1254	1075.94	4.62	0.25	4.227e-80	8.118e-79
AO090003000302	2	2911048	2912870	1822	2376.49	-1.71	0.07	1.961e-128	3.853e-127		AO090003000825	2	4313997	4316154	2157	2949.07	-7.01	0.37	4.375e-80	8.389e-79
AO090701000839	5	162132	165191	3059	9314.88	-2.14	0.09	4.646e-128	9.115e-127		AO090011000444	7	1124114	1125088	974	2756.13	-2.25	0.12	4.39e-80	8.402e-79
AO090009000244	1	651220	656113	4893	9013.35	-1.96	0.08	6.382e-128	1.25e-126		AO090003000997	2	4799970	4801224	1254	738	2.06	0.11	5.108e-80	9.761e-79
AO090005001229	1	3171621	3172741	1120	3484.26	-2.46	0.1	6.896e-128	1.348e-126		AO090026000199	3	4555105	4560196	5091	389.22	-5.36	0.29	7.075e-80	1.35e-78
AO090009000417	1	1099008	1100658	1650	1428.94	-2.46	0.1	1.002e-127	1.956e-126		AO090003000828	2	4321124	4324399	3275	2182.28	2.5	0.13	8.607e-80	1.639e-78
AO090023000945	3	2492253	2495630	3377	1423.8	-1.93	0.08	1.015e-127	1.978e-126		AO090003000209	2	2649229	2650570	1341	3197.28	-4.51	0.24	1.168e-79	2.22e-78
AO090102000316	4	3686844	3687996	1152	705.08	2.51	0.1	1.466e-127	2.852e-126		AO090005000833	1	4188541	4190217	1676	1096.93	3.21	0.17	1.38e-79	2.619e-78
AO090009000630	1	1680414	1682325	1911	15644.4	2.22	0.09	1.489e-127	2.892e-126		AO090005000159	1	6007121	6008211	1090	1027.36	2.63	0.14	2.707e-79	5.13e-78
AO090001000681	2	1795486	1797997	2511	3174.85	-1.98	0.08	1.93e-127	3.742e-126		AO090003001270	2	5537028	5537703	675	1911.64	-4.75	0.25	3.457e-79	6.54e-78
AO090023000863	3	2252861	2253734	873	1752.74	1.86	0.08	2.103e-127	4.071e-126		AO090103000376	8	300092	303453	3361	824.26	-2.67	0.14	3.828e-79	7.229e-78
AO090038000215	6	3088887	3089673	786	334.05	3.21	0.13	2.221e-127	4.292e-126		AO090011000249	7	639925	641844	1919	492.68	-4.71	0.25	4.671e-79	8.806e-78
AO090113000008	5	4067710	4069175	1465	558.24	-4.75	0.2	2.784e-127	5.372e-126		AO090005000301	1	5642272	5643493	1221	255.36	4.11	0.22	5.448e-79	1.026e-77
AO090003001108	2	5111167	5115088	3921	4915.32	3.49	0.15	4.095e-127	7.887e-126		AO090005000352	1	5538363	5539625	1262	820.79	2.08	0.11	7.114e-79	1.337e-77
AO090012000966	4	2505507	2507496	1989	1329.57	-2.47	0.1	5.062e-127	9.734e-126		AO090012000579	4	1467802	1469746	1944	626.24	-6.85	0.37	1.007e-78	1.89e-77
AO090005000897	1	4028170	4028816	646	1541.48	2.52	0.11	5.473e-127	1.051e-125		AO090026000650	3	3331756	3333628	1872	2921.49	1.66	0.09	1.078e-78	2.019e-77
AO090120000042	5	2782163	2783089	926	3805.06	-1.93	0.08	6.057e-127	1.161e-125		AO090103000469	8	88776	90457	1681	860.13	-3.01	0.16	1.32e-78	2.467e-77
AO090005001249	1	3112862	3114423	1561	10487.9	2.22	0.09	2.223e-126	4.253e-125		AO090005001308	1	2923396	2924508	1112	669.27	-6.55	0.35	1.438e-78	2.684e-77
AO090026000820	3	2887484	2890471	2987	9333.75	2.08	0.09	2.545e-126	4.861e-125		AO090011000538	7	1345923	1347711	1788	8052.43	-2.79	0.15	1.488e-78	2.773e-77
AO090023000033	3	88576	89245	669	2064.7	1.92	0.08	2.669e-126	5.089e-125		AO090005001254	1	3091012	3092575	1563	1908.13	-6.25	0.34	1.495e-78	2.782e-77
AO090701000725	5	439915	440965	1050	19734.4	2.23	0.09	3.325e-126	6.33e-125		AO090001000378	2	951563	952488	925	3366.41	2.25	0.12	2.029e-78	3.769e-77
AO090102000413	4	3399726	3401147	1421	1584.69	-2.35	0.1	3.532e-126	6.715e-125		AO090005001008	1	3735478	3736696	1218	2347.86	2.94	0.16	2.202e-78	4.084e-77
AO090005000834	1	4185007	4185760	753	2841.52	1.67	0.07	3.675e-126	6.974e-125		AO090005001077	1	3572382	3573214	832	8436.88	2.32	0.12	2.433e-78	4.505e-77
AO090009000568	1	1494693	1496210	1517	4639.73	-2.19	0.09	4.087e-126	7.743e-125		AO090020000491	6	571211	573787	2576	1579.92	2.17	0.12	2.506e-78	4.632e-77
AO090011000614	7	1573459	1574580	1121	4726.62	-2.51	0.11	4.479e-126	8.472e-125		AO090120000264	5	3372470	3373548	1078	10792.1	1.43	0.08	3.206e-78	5.916e-77
AO090020000540	6	441737	442419	682	9383.63	-1.8	0.08	5.148e-126	9.722e-125		AO090120000498	5	4016804	4017338	534	1995.5	2.21	0.12	1.062e-77	1.957e-76
AO090009000360	1	962320	965368	3048	2788.26	1.74	0.07	6.225e-126	1.174e-124		AO090009000472	1	1243383	1244643	1260	3583.87	1.8	0.1	1.228e-77	2.258e-76
AO090001000573	2	1505032	1505795	763	1019.03	2.97	0.13	8.229e-126	1.549e-124		AO090010000208	8	2843739	2846485	2746	2278.26	-1.8	0.1	2.173e-77	3.99e-76
AO090023000412	3	1055420	1056278	858	1242.45	2.94	0.12	1.035e-125	1.945e-124		AO090023000429	3	1095582	1096233	651	820.38	4.69	0.25	2.648e-77	4.855e-76
AO090003001392	2	5856977	5858466	1489	527.83	-5.29	0.22	1.199e-125	2.251e-124		AO090001000509	2	1308567	1312121	3554	8943.06	-2.41	0.13	3.223e-77	5.9e-76
AO090124000084	5	2467555	2473898	6343	32903.3	2	0.08	1.461e-125	2.737e-124		AO090005000824	1	4213710	4216711	3001	1552.59	2.01	0.11	4.59e-77	8.388e-76
AO090005000433	1	5304076	5308556	4480	25772.9	1.85	0.08	1.537e-125	2.875e-124		AO090038000291	6	2894996	2897003	2007	1339.13	2.04	0.11	4.696e-77	8.569e-76
AO090003000513	2	3460236	3460939	703	1600.17	1.74	0.07	1.546e-125	2.886e-124		AO090701000133	5	1985686	1986578	892	572.96	2.43	0.13	5.296e-77	9.648e-76
AO090001000193	2	439438	444011	4573	2360.67	-2.28	0.1	3.413e-125	6.363e-124		AO090011000040	7	109145	115780	6635	6074.83	-2.24	0.12	5.477e-77	9.961e-76
AO090120000008	5	2712149	2713808	1659	940.58	-6.38	0.27	3.524e-125	6.559e-124		AO090026000051	3	4988058	4989890	1832	636.73	-5.87	0.32	5.786e-77	1.051e-75
AO090001000184	2	421593	422928	1335	1538.43	-3.28	0.14	3.733e-125	6.937e-124		AO090020000608	6	281827	282520	693	1711.05	3.2	0.17	5.799e-77	1.051e-75
AO090009000169	1	446840	447639	799	1417.72	1.87	0.08	4.697e-125	8.715e-124		AO090701000041	5	2246278	2248606	2328	6452.84	2.3	0.12	6.997e-77	1.267e-75
AO090010000447	8	2193989	2194656	667	5132.57	1.96	0.08	5.348e-125	9.906e-124		AO090020000093	6	1570854	1571369	515	907.44	-2.47	0.13	9.792e-77	1.769e-75
AO090005001616	1	2101689	2103113	1424	6044.91	1.39	0.06	5.925e-125	1.096e-123		AO090023000821	3	2139772	2142862	3090	1793.63	2.08	0.11	1.121e-76	2.023e-75
AO090023000870	3	2272631	2274248	1617	3880.07	1.99	0.08	6.664e-125	1.23e-123		AO090023000483	3	1238035	1244821	6786	6285.05	3.47	0.19	1.136e-76	2.047e-75
AO090011000368	7	945779	947110	1331	3144.42	-1.88	0.08	6.768e-125	1.248e-123		AO090009000410	1	1082193	1084068	1875	1390.5	-3.85	0.21	1.151e-76	2.07e-75
AO090701000552	5	891000	892934	1934	2410.16	2.03	0.09	7.599e-125	1.399e-123		AO090003000992	2	4788660	4790338	1678	3547.07	2.26	0.12	1.162e-76	2.087e-75
[truncated: 4,507 more rows]

## Sheet: Table S3
Table S3
Vanillin
1 h											3 h											5 h											24 h
[truncated: 3,758 more rows]

## Sheet: Table S4
Table S4
[truncated: 3,940 more rows]

[truncated: 7 more sheets: Table S5, Table S6, Table S7, Table S8, Table S9, Table S10, Table S11]
